# Supplementary material for: Ruthenium-catalyzed three-component tandem remote C–H functionalization of naphthalenes: modular and concise synthesis of multifunctional naphthalenes
Source: Royal Society of Chemistry journal article supplement (doi:10.1039/d4sc06846g), 2024-12-12

## Supporting Information

### Three-component tandem remote C-H functionalization of naphthalenes by ruthenium catalysis: Modular and concise synthesis of multifunctional naphthalenes

Mao-Gui Huang,<sup>[a]</sup> Yue-Liu-Ting Fu,<sup>[a]</sup> Jia-Wei Li,<sup>[b]</sup> Yue-Jin Liu,<sup>\*,[a]</sup>

<sup>[a]</sup> M.-G. Huang, Y.-L.-T. Fu, Y.-J. Liu. Hubei Collaborative Innovation Center for Advanced Organic Chemical Materials, Ministry of Education Key Laboratory for the Synthesis and Application of Organic Functional Molecules. College of Chemistry and Chemical Engineering, Hubei University, Wuhan 430062, P. R. China. E-mail: liuyuejin@hubu.edu.cn.

<sup>[b]</sup> J.-W. Li. Institute of Medicinal Development and Application for Aquatic Disease Control, Zhoukou Key Laboratory of Small Molecule Drug Development and Application. School of Chemistry and Chemical Engineering, Zhoukou Normal University, Zhoukou 466001, P. R. China.

## Table of Contents

|                                                                                                                       |     |
|-----------------------------------------------------------------------------------------------------------------------|-----|
| 1. General Information .....                                                                                          | S2  |
| 2. Experimental procedures .....                                                                                      | S3  |
| 2.1 Synthesis of substrates .....                                                                                     | S3  |
| 2.2 Optimization studies .....                                                                                        | S3  |
| 2.3 General procedure for Ru(II)-catalyzed three-component reaction of naphthalenes, olefins and alkyl bromides ..... | S6  |
| 2.4 Synthetic application .....                                                                                       | S6  |
| 2.5 General procedures for Phosphine-Promoted Pd-catalyzed Suzuki-Miyaura Coupling .....                              | S9  |
| 2.6 Mechanism studies .....                                                                                           | S9  |
| 3. Characterization data .....                                                                                        | S17 |
| 4. Crystallographic Data .....                                                                                        | S55 |
| 5. References .....                                                                                                   | S56 |
| 6. NMRspectra .....                                                                                                   | S57 |

## 1. General Information

Unless otherwise noted, all reactions were carried out in a flamedried, sealed Schlenk reaction tube under an atmosphere of argon. Materials were purchased from Alfa-Aesar, LaaJoo, Macklin, Adamas, Bidepharm and Aladdin and used as received. All the solvents were purchased from commercial suppliers and purified by standard procedures as specified in *Purification of Laboratory Chemicals*, 4th Ed (W. L. F. Armarego, D. D. Perrin, Butterworth-Heinemann: 1997). Analytical thin layer chromatography (TLC) was performed on silica gel plates with F-254 indicator and compounds were visualized by irradiation with UV light. Flash column chromatography was carried out using silica gel (200-300 mesh) at increased pressure. The  $^1\text{H}$ ,  $^{13}\text{C}$ ,  $^{31}\text{P}$  and  $^{19}\text{F}$  NMR spectroscopic data were recorded on Bruker Mercury Plus 400 MHz or 500 MHz NMR spectrometers. Chemical shifts ( $\delta$ ) for  $^1\text{H}$  and  $^{13}\text{C}$  are referenced to internal solvent resonances and reported relative to  $\text{SiMe}_4$ . Chemical shifts for  $^{31}\text{P}$  are reported relative to an external 85%  $\text{H}_3\text{PO}_4$  standard.  $^1\text{H}$  NMR coupling constants were reported in Hz, and multiplicity was indicated as follows: s (singlet); d (doublet); t (triplet); q (quartet); m (multiplet); dd (doublet of doublets); dt (doublet of triplets); td (triplet of doublets); tt (triplet of triplets). The diffraction data of crystals were collected on a Rigaku XtaLAB Synergy CCD diffractometer with graphite monochromated Cu-K $\alpha$  radiation ( $\lambda = 1.54184 \text{ \AA}$ ) at 293 K. The ellipsoid contour is 50% probability in the caption for the image of the 4f. Absorption corrections were applied by SADABS. All the structures were solved by direct methods and refined by full-matrix least-squares method on  $F^2$  using SHELXTL-2014. All non-hydrogen atoms were refined with anisotropic displacement parameters. The hydrogen atoms of the ligand were generated geometrically. High resolution mass spectra (HRMS) were recorded on the Thermo Scientific Exactive Plus equipped with ESI ionization source. (naphthalen-1-yl-8-d)diphenylphosphane, (naphthalen-1-yl-5-d)diphenylphosphane were synthesized according to the published procedures.<sup>[3]</sup>

## 2. Experimental procedures

### 2.1 Synthesis of substrates

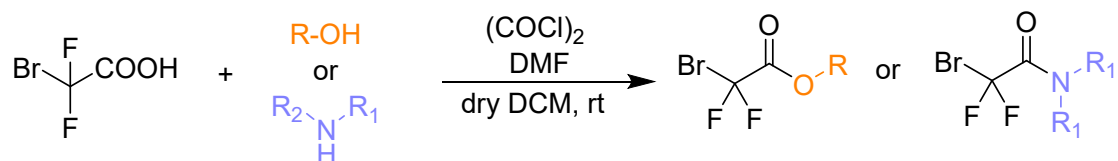

#### General procedure for substrates 3<sup>[1]</sup>

2-bromo-2,2-difluoroacetic acid (1 equiv.) was dissolved in dry DCM in a dry round bottom flask under an atmosphere of nitrogen. Oxalyl chloride (1.1 equiv) was then added followed by two drops of DMF. The solution was then stirred at room temperature for 2 hours or until no more gas evolved. The corresponding alcohol (2 equiv.) or amine (2 equiv.) and triethylamine (1.1 equiv.) were then added dropwise as a solution in DCM at 0 °C over 20 min. The cooling was removed and stirring was continued for 2 hours. The crude reaction was then diluted with water and extracted three times with DCM. The combined organic phases were washed with saturated bicarbonate and dried over Na<sub>2</sub>SO<sub>4</sub>, filtered and concentrated in vacuo. The resulting residue was then filtered through a short plug of silica and the fractions containing product were concentrated to afford the corresponding product.

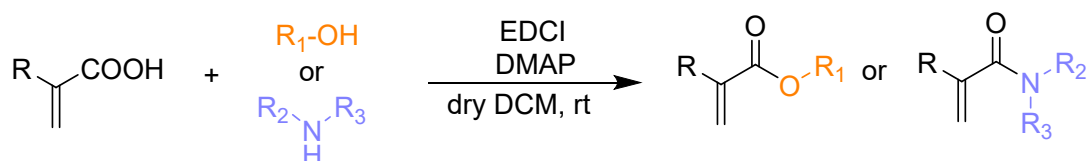

#### General procedure for substrates 2<sup>[2]</sup>

To a solution of acrylic acid (2 mmol) in CH<sub>2</sub>Cl<sub>2</sub> (5 mL) at 0 °C was added the corresponding alcohol (equiv.) or amine (1.1 eq, 2.2 mmol), followed by EDC·HCl (1.2 eq, 2.4 mmol), and DMAP (0.2 eq, 0.4 mmol). The mixture was allowed to warm up to room temperature and continued stirring for 12 hrs. Saturated aqueous solution of NaHCO<sub>3</sub> (15 mL) was added to quench the reaction, and the resulting mixture was extracted with CH<sub>2</sub>Cl<sub>2</sub> several times (3 x 15 mL). The combined organic extracts were washed with brine, and dried over Na<sub>2</sub>SO<sub>4</sub>, filtered and concentrated in vacuo. The resulting residue was then filtered through a short plug of silica and the fractions containing product were concentrated to afford the corresponding products.

### 2.2 Optimization studies

**Table S1:** Investigation of solvent

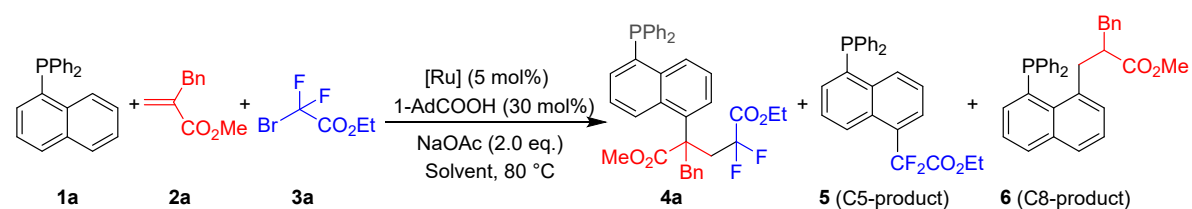

| Entry <sup>a</sup> | Solvent           | yield <b>4a</b> (%) <sup>b</sup> | yield <b>5</b> (%) <sup>b</sup> | yield <b>6</b> (%) <sup>b</sup> |
|--------------------|-------------------|----------------------------------|---------------------------------|---------------------------------|
| 1                  | PhCF <sub>3</sub> | 82                               | 0                               | 0                               |
| 2                  | Cyclohexane       | 60                               | 0                               | 0                               |
| 3                  | MeCN              | 22                               | 0                               | 0                               |
| 4                  | PhMe              | 78                               | 0                               | 0                               |
| 5                  | <i>t</i> -BuOMe   | 80                               | 0                               | 0                               |
| 6                  | EA                | 30                               | 0                               | 0                               |
| 7                  | EtOH              | 28                               | 0                               | 0                               |

<sup>a</sup>Reaction conditions: **1** (0.1 mmol), **2a** (0.3 mmol), **3a** (0.3 mmol),  $[RuCl_2(p\text{-cymene})]_2$  (5.0 mol %), 1-AdCOOH (30 mol%), NaOAc (0.2 mmol), Solvent (1 mL), 12 h, under Ar. <sup>b</sup>Yields were determined by <sup>1</sup>H NMR.

**Table S2:** Influence of base

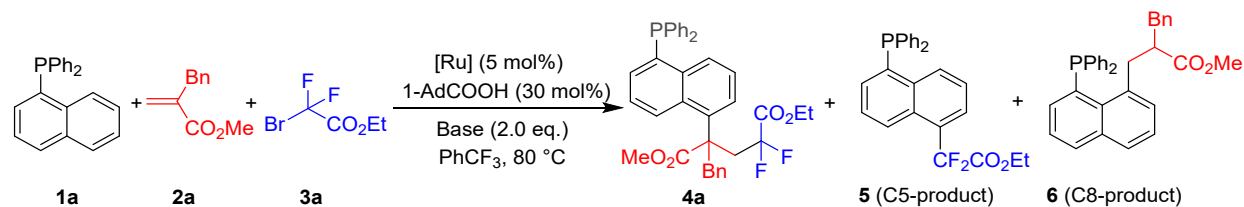

| Entry <sup>a</sup> | Base                             | yield <b>4a</b> (%) <sup>b</sup> | yield <b>5</b> (%) <sup>b</sup> | yield <b>6</b> (%) <sup>b</sup> |
|--------------------|----------------------------------|----------------------------------|---------------------------------|---------------------------------|
| 1                  | NaOAc                            | 82                               | 0                               | 0                               |
| 2                  | NaH <sub>2</sub> PO <sub>4</sub> | 15                               | 0                               | 0                               |
| 3                  | Na <sub>2</sub> HPO <sub>4</sub> | 50                               | 0                               | 0                               |
| 4                  | Na <sub>2</sub> CO <sub>3</sub>  | 70                               | 0                               | 0                               |
| 5                  | <i>t</i> -BuONa                  | 10                               | 0                               | 0                               |
| 6                  | CF <sub>3</sub> COONa            | trace                            | 0                               | 0                               |
| 7                  | PivONa                           | 71                               | 0                               | 0                               |
| 8                  | NaHCO <sub>3</sub>               | 75                               | 0                               | 0                               |

<sup>a</sup>Reaction conditions: **1** (0.1 mmol), **2a** (0.3 mmol), **3a** (0.3 mmol),  $[RuCl_2(p\text{-cymene})]_2$  (5.0 mol %), 1-AdCOOH (30 mol%), Base (0.2 mmol), PhCF<sub>3</sub> (1 mL), 12 h, under Ar. <sup>b</sup>Yields were determined by <sup>1</sup>H NMR.

**Table S3:** Influence of Ligand



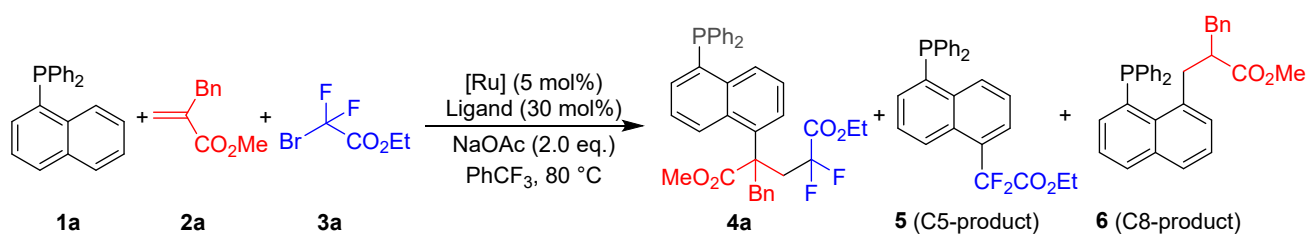

| Entry <sup>a</sup> | Ligand                            | yield <b>4a</b> (%) <sup>b</sup> | yield <b>5</b> (%) <sup>b</sup> | yield <b>6</b> (%) <sup>b</sup> |
|--------------------|-----------------------------------|----------------------------------|---------------------------------|---------------------------------|
| 1                  | 1-AdCOOH                          | 82                               | 0                               | 0                               |
| 2                  | MesCOOH                           | 80                               | 0                               | 0                               |
| 3                  | N-Ac-L-Ala-OH                     | 79                               | 0                               | 0                               |
| 4                  | N-Boc-L-Ala-OH                    | 80                               | 0                               | 0                               |
| 5                  | L-Ala-OH                          | 70                               | 0                               | 0                               |
| 6                  | DPPE                              | trace                            | 0                               | 0                               |
| 7                  | ( <i>p</i> -OMePh) <sub>3</sub> P | 78                               | 0                               | 0                               |
| 8                  | no                                | 85                               | 0                               | 0                               |

<sup>a</sup>Reaction conditions: **1** (0.1 mmol), **2a** (0.3 mmol), **3a** (0.3 mmol), [RuCl<sub>2</sub>(*p*-cymene)]<sub>2</sub> (5.0 mol %), Ligand (30 mol%), NaOAc (0.2 mmol), PhCF<sub>3</sub> (1 mL), 12 h, under Ar. <sup>b</sup>Yields were determined by <sup>1</sup>H NMR.

## 2.3 General procedure for Ru(II)-catalyzed three-component reaction of naphthalenes, olefins and alkyl bromides.

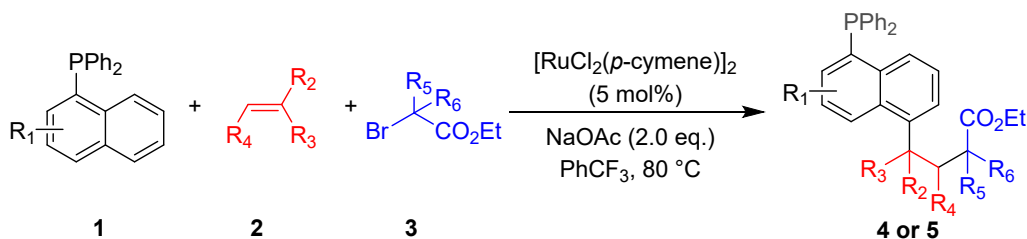

**General procedure A:** To a 25 mL Schlenk tube was added **1** (0.1 mmol, 1.0 equiv), **2** (0.3 mmol, 3.0 equiv), **3** (0.3 mmol, 3.0 equiv),  $[\text{RuCl}_2(p\text{-cymene})]_2$  (3.0 mg, 5 mol%), NaOAc (16.4 mg, 2.0 equiv). The tube was purged with Ar three times, followed by addition of  $\text{PhCF}_3$  (1 mL). The mixture was stirred at 80 °C in heating module for 12 h. The solution was then cooled to room temperature and the solvent was removed under vacuum directly. The crude product was purified by column chromatography on silica gel affording the products.

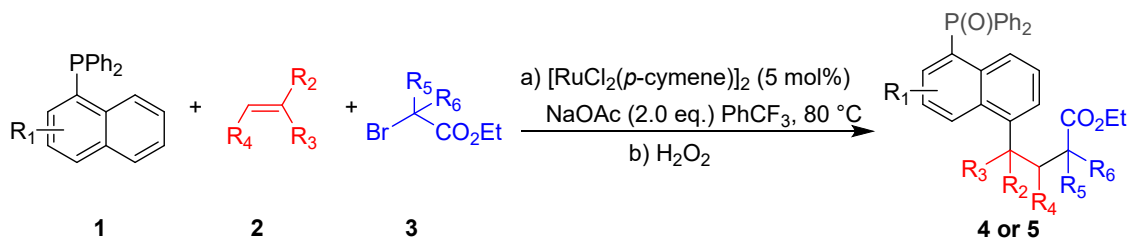

**General procedure B:** To a 25 mL Schlenk tube was added **1** (0.1 mmol, 1.0 equiv), **2** (0.3 mmol, 3.0 equiv), **3** (0.3 mmol, 3.0 equiv),  $[\text{RuCl}_2(p\text{-cymene})]_2$  (3.0 mg, 5 mol%), NaOAc (16.4 mg, 2.0 equiv). The tube was purged with Ar three times, followed by addition of  $\text{PhCF}_3$  (1 mL). The mixture was stirred at 80 °C in heating module for 12 h. The solution was then cooled to room temperature and the solvent was removed under vacuum directly. The crude product was purified by column chromatography on silica gel affording the products. The obtained product was dissolved by DCM, and 1 mL  $\text{H}_2\text{O}_2$  was added to obtain the oxidized product.

## 2.4 Synthetic applications

a) Gram-scale reaction

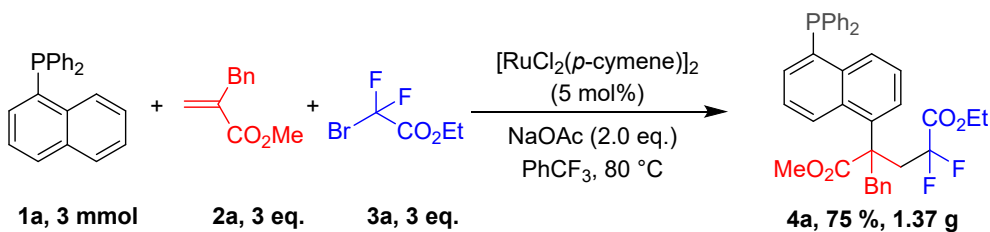

To a 50 mL Schlenk tube was added 1-naphthalenyldiphenylphosphane **1a** (3 mmol, 936 mg, 1.0 equiv), methyl 2-benzylacrylate **2a** (9 mmol, 1.5 mL, 3.0 equiv), ethyl 2-bromo-2,2-difluoroacetate **3a** (9 mmol, 1.2 mL, 3.0 equiv),  $[\text{RuCl}_2(p\text{-cymene})]_2$  (90 mg, 5 mol%), NaOAc (492 mg, 2.0 equiv). The tube was

purged with Ar three times, followed by addition of PhCF<sub>3</sub> (20 mL). The mixture was stirred at 80 °C in an oil bath for 18 h. The solution was then cooled to room temperature and the solvent was removed under vacuum directly. The crude product was purified by column chromatography on silica gel (*R*<sub>f</sub> = 0.5, PE/DCM/EA = 10/1/1) affording the product **4a** (white solid, 1.37 g, 75% yield).

## b) Derivatization of product

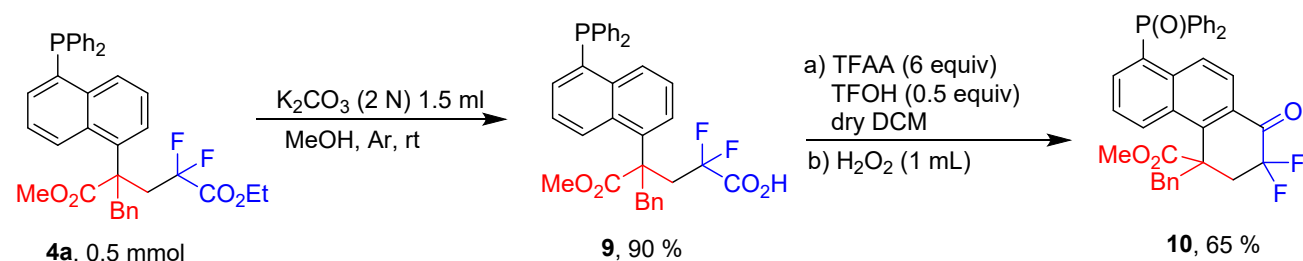

To a 50 mL Schlenk tube was added **4a** (305mg, 0.5 mmol), K<sub>2</sub>CO<sub>3</sub> (1.5 mL, 2N). The tube was purged with Ar three times, followed by the addition of MeOH (3 mL). The mixture was stirred at room temperature for 2 h and poured into 5% HCl (3.0 mL), and successively extracted with EtOAc (10 mL × 3). The combined organic phase was washed with brine and dried over anhydrous Na<sub>2</sub>SO<sub>4</sub>. The crude product was purified by column chromatography on silica gel (DCM/MeOH: 4/1) affording the pure product **9** (white solid, 262 mg, 90 %).<sup>[3]</sup> The obtained product was dissolved by DCM, and 1mL H<sub>2</sub>O<sub>2</sub> was added to obtain the oxidized product. <sup>1</sup>H NMR (400 MHz, CDOD<sub>3</sub>) δ 8.44 (d, *J* = 8.6 Hz, 1H), 8.29 (d, *J* = 8.8 Hz, 1H), 7.67 - 7.44 (m, 12H), 7.36 - 7.26 (m, 2H), 7.16 - 7.03 (m, 3H), 6.96 - 6.66 (m, 2H), 3.95 (d, *J* = 13.2 Hz, 1H), 3.69 (d, *J* = 13.2 Hz, 1H), 3.59 (s, 3H), 3.14 - 2.84 (m, 2H). <sup>13</sup>C NMR (126 MHz, CDOD<sub>3</sub>) δ 177.9, 140.3, 137.7, 135.7 (d, *J* = 7.6 Hz), 134.7 (d, *J* = 11.3 Hz), 133.8, 133.7, 133.5 (d, *J* = 6.3 Hz), 133.2, 133.1, 133.0, 132.6 (d, *J* = 2.5 Hz), 131.9, 130.4 (d, *J* = 1.3 Hz), 130.3 (d, *J* = 103.3 Hz), 130.1, 130.0, 128.8, 128.3 (d, *J* = 6.3 Hz), 127.7, 127.4, 127.3, 125.5 (d, *J* = 15.1 Hz), 119.2, 53.5, 52.9, 42.8, 39.2 (t, *J* = 21.4 Hz). <sup>31</sup>P NMR (202 MHz, CDOD<sub>3</sub>) δ 36.0. <sup>19</sup>F NMR (471 MHz, CDOD<sub>3</sub>) δ -102.5 (d, *J* = 249.6 Hz), -104.7 (d, *J* = 244.9 Hz). HRMS (ESI) *m/z*: [M-H]<sup>-</sup> calcd for C<sub>35</sub>H<sub>27</sub>F<sub>2</sub>O<sub>5</sub>P<sup>-</sup> 597.1648; found 597.1643.

A solution of 4-benzyl-4-(5-(diphenylphosphanyl)naphthalen-1-yl)-2,2-difluoro-5-methoxy-5-oxopentanoic acid (0.1 mmol), TFAA (6 equiv), triflic acid (0.5 equiv) in dry dichloromethane (1 mL) was stirred for 12 h at room temperature. The reaction mixture was evaporated under reduced pressure, and after quenching with water, the residue was redissolved in dichloromethane (10 mL), washed with 5% NaHCO<sub>3</sub> (2 × 3 mL), water (2 × 3 mL), and dried over Na<sub>2</sub>SO<sub>4</sub>. The solvent was removed in vacuum, and the crude reaction mixture was purified by silica gel chromatography (*R*<sub>f</sub> = 0.5, EA/PE = 1/15) affording the pure product.<sup>[4]</sup> The obtained product was dissolved by DCM, and 1mL H<sub>2</sub>O<sub>2</sub> was added to obtain the oxidized product **10** (white solid, 37.7 mg, 65 %). <sup>1</sup>H NMR (400 MHz, CDCl<sub>3</sub>) δ 8.69 (d, *J* = 8.6 Hz, 1H), 8.07 - 7.98 (m, 2H), 7.74 - 7.66 (m, 5H), 7.74 - 7.66 (m, 5H), 7.60 - 7.53 (m, 6H), 7.42 - 7.37 (m, 1H), 7.25 - 7.31 (m, 1H), 7.19 (d, *J* = 7.6 Hz, 1H), 4.40 (d, *J* = 14.2 Hz, 1H), 3.79 - 3.64 (m, 2H), 3.36 (s, 3H), 2.86

(ddd,  $J = 15.4, 13.6, 10.8$  Hz, 1H).  $^{13}\text{C}$  NMR (101 MHz,  $\text{CDCl}_3$ )  $\delta$  189.6 (t,  $J = 25.3$  Hz), 175.6, 139.6, 135.2 (d,  $J = 8.1$  Hz), 134.3, 133.6, 133.5, 133.2 (d,  $J = 22.2$  Hz), 132.4, 132.3, 132.2, 132.1, 132.0, 131.5 (d,  $J = 8.1$  Hz), 131.5, 130.6, 130.5, 129.0, 128.9, 128.8, 128.6 (d,  $J = 6.1$  Hz), 128.3, 127.9, 126.8, 125.2 (d,  $J = 14.1$  Hz), 124.0, 116.6 (t,  $J = 48.5$  Hz), 53.0, 50.2 (d,  $J = 11.1$  Hz), 41.7 (d,  $J = 6.1$  Hz), 41.4 (d,  $J = 4.0$  Hz).  $^{31}\text{P}$  NMR (162 MHz,  $\text{CDCl}_3$ )  $\delta$  33.2.  $^{19}\text{F}$  NMR (377 MHz,  $\text{CDCl}_3$ )  $\delta$  -94.2 (d,  $J = 275.2$  Hz), -101.8 (d,  $J = 275.2$  Hz). HRMS (ESI)  $m/z$ :  $[\text{M}+\text{H}]^+$  calcd for  $\text{C}_{35}\text{H}_{28}\text{F}_2\text{O}_4\text{P}^+$  581.1688; found 581.1680.

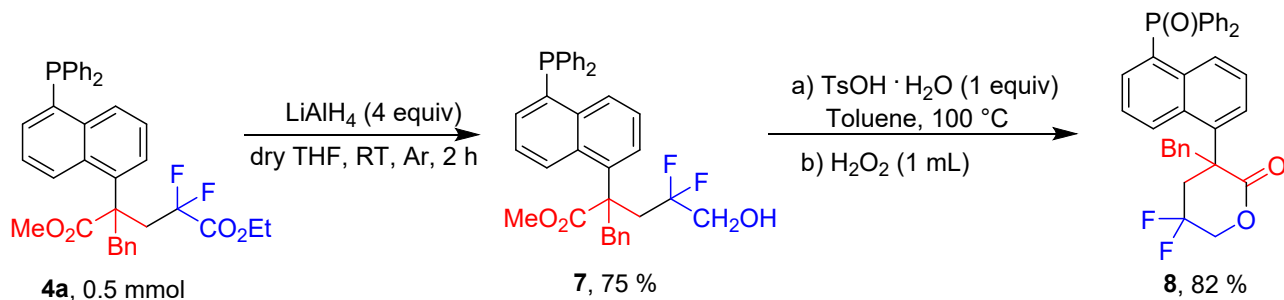

Into a dry 50 mL round bottom flask charged with a PTFE-coated magnetic stir bar were added **4a** (305 mg, 0.2 mmol, 1.0 equiv) and 10 mL of THF. The solution was chilled in an ice bath and purged with argon. To this mixture, lithium aluminum hydride (0.8 mmol, 4.0 equiv) was added in four approximately equal portions over 10 minutes. The reaction was allowed to warm to room temperature and stir for an additional 2 h. The flask was returned to an ice bath and quenched with 10 mL of 1 M aqueous HCl. The primary alcohol product was extracted with EtOAc (3 x 20 mL). The combined organic layers were dried over anhydrous  $\text{Na}_2\text{SO}_4$ , filtered, and concentrated under reduced pressure. the residue was purified by prepared column chromatography ( $R_f = 0.5$ , PE/EA=15:1) on silica gel to afford the pure product **7** (white solid, 213 mg, 75%).<sup>[5]</sup>  $^1\text{H}$  NMR (400 MHz,  $\text{CDCl}_3$ )  $\delta$  8.49 (dd,  $J = 8.4, 5.2$  Hz, 1H), 7.96 (d,  $J = 8.6$  Hz, 1H), 7.49 - 7.26 (m, 13H), 7.23 - 7.13 (m, 13H), 7.04 - 6.70 (m, 3H), 3.96 (d,  $J = 13.2$  Hz, 1H), 3.72 - 3.65 (m, 1H), 3.61 (s, 3H), 3.40 - 2.72 (m, 4H).  $^{13}\text{C}$  NMR (101 MHz,  $\text{CDCl}_3$ )  $\delta$  176.4, 137.8 (d,  $J = 2.0$  Hz), 136.6 (d,  $J = 14.1$  Hz), 136.4 (d,  $J = 4.1$  Hz), 136.3, 136.2 (d,  $J = 15.2$  Hz), 134.5, 134.3, 131.6, 131.5, 130.8, 129.1, 128.8, 128.7, 128.1, 127.1, 126.8, 126.2, 125.5 (d,  $J = 2.0$  Hz), 125.3, 124.4, 123.3, 65.2 (t,  $J = 32.3$  Hz), 52.6, 52.0, 41.9.  $^{31}\text{P}$  NMR (162 MHz,  $\text{CDCl}_3$ )  $\delta$  -12.4.  $^{19}\text{F}$  NMR (377 MHz,  $\text{CDCl}_3$ )  $\delta$  -106.6 (m), -107.2 (m). HRMS (ESI)  $m/z$ :  $[\text{M}-\text{H}]^-$  calcd for  $\text{C}_{35}\text{H}_{30}\text{F}_2\text{O}_3\text{P}^-$  567.1906; found 567.1904. A solution of compound **7** (56.8 mg, 0.1 mmol) and *p*-toluenesulfonic acid monohydrate (19 mg, 0.1 mmol) in toluene (1 mL) was stirred under an atmosphere of dry argon and heated to 100°C for 12 hours. The cooled solution was filtered and concentrated under reduced pressure. the residue was purified by prepared column chromatography ( $R_f = 0.5$ , PE/EA=15:1) on silica gel to afford the pure product.<sup>[6]</sup> The obtained product was dissolved by DCM, and 1mL  $\text{H}_2\text{O}_2$  was added to obtain the oxidized product **8** (45 mg, 82 %).  $^1\text{H}$  NMR (400 MHz,  $\text{CDCl}_3$ )  $\delta$  8.85 - 8.77 (m, 2H), 7.72 - 7.65 (m, 4H), 7.63 - 7.55 (m, 2H), 7.54 - 7.47 (m, 5H), 7.36 - 7.27 (m, 2H), 7.17- 7.12 (m, 1H), 7.08 - 7.04 (m, 3H), 6.46 (d,  $J = 7.2$  Hz, 2H), 4.07 (dd,  $J = 15.6, 12.8$  Hz, 1H), 3.85 - 3.71 (m, 2H), 3.41 - 3.29 (m, 2H), 2.59 - 2.46 (m, 1H).  $^{13}\text{C}$

**NMR** (101 MHz, CDCl<sub>3</sub>)  $\delta$  174.6, 135.5 (d,  $J$  = 8.1 Hz), 134.7, 134.1 (d,  $J$  = 6.1 Hz), 133.1 (d,  $J$  = 8.1 Hz), 132.3, 132.2, 132.1, 132.0, 131.9 (d,  $J$  = 9.1 Hz), 130.8 (t,  $J$  = 43.4 Hz), 130.7, 129.6 (d,  $J$  = 7.1 Hz), 128.9, 128.8, 128.5 (d,  $J$  = 2.0 Hz), 128.1, 127.4 (d,  $J$  = 4.0 Hz), 127.3, 126.1, 125.5 (d,  $J$  = 14.1 Hz), 119.6 (t,  $J$  = 247.5 Hz), 69.2 (dd,  $J$  = 39.4, 30.3 Hz), 51.4 (d,  $J$  = 6.1 Hz), 44.6, 41.0 (dd,  $J$  = 28.3, 24.2 Hz). **<sup>31</sup>P NMR** (162 MHz, CDCl<sub>3</sub>)  $\delta$  33.3. **<sup>19</sup>F NMR** (377 MHz, CDCl<sub>3</sub>)  $\delta$  -85.6 (d,  $J$  = 252.6 Hz), -96.8 (dt,  $J$  = 252.6, 15.1 Hz). **HRMS** (ESI)  $m/z$ : [M+H]<sup>+</sup> calcd for C<sub>34</sub>H<sub>28</sub>F<sub>2</sub>O<sub>3</sub>P<sup>+</sup> 553.1739; found 553.1734.

## 2.5 General procedures for Phosphine-Promoted Pd-catalyzed Suzuki-Miyaura Coupling

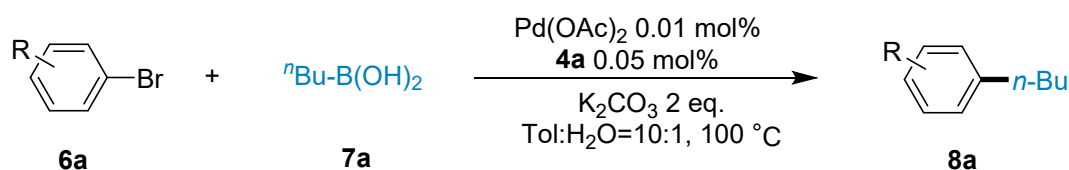

First, catalyst stock solutions were prepared by dissolving Pd(OAc)<sub>2</sub> (2.3 mg) and **4a** (20.6 mg) in DCM (10 mL) under nitrogen atmosphere at room temperature with continuous stirring for 5 min. Add 0.1 mL of the stock solution to a 25 mL Schlenk tube and remove the solvent under vacuum. Aryl bromide **6a** (1 mmol, 1.0 equiv), *n*-butylboronic acid **7a** (1.3 mmol, 1.3 equiv), K<sub>2</sub>CO<sub>3</sub> (276.0 mg, 2 equiv) were added to a Schlenk tube. The tube was then purged 3 times with Ar followed by addition of toluene and water (10:1, 2 mL). The mixture was stirred at 100 °C for 12 h. The solution was then cooled to room temperature and the yields were determined by GC-MS.

## 2.6 Mechanism studies

### 2.6.1 Radical trapping experiment

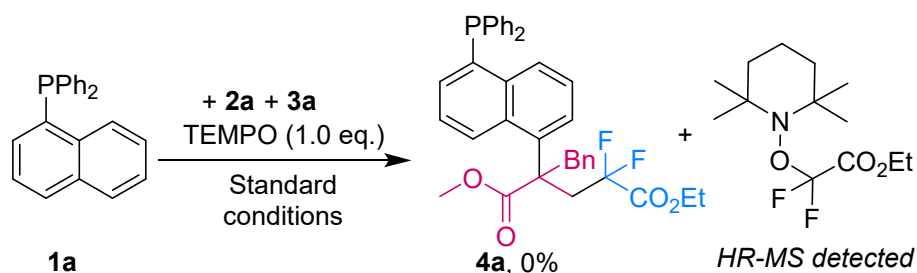

To a 25 mL Schlenk tube was added **1** (0.1 mmol, 1.0 equiv), **2a** (0.3 mmol, 51  $\mu$ L, 3.0 equiv), **3a** (0.3 mmol, 39  $\mu$ L, 3.0 equiv), [RuCl<sub>2</sub>(*p*-cymene)]<sub>2</sub> (3.0 mg, 5 mol%), NaOAc (16.4 mg, 2.0 equiv), TEMPO (15.6 mg, 1.0 equiv). The tube was purged with Ar three times, followed by addition of PhCF<sub>3</sub> (1 mL). The mixture was stirred at 80 °C in heating module for 12 h. After cooling to room temperature, Take out the appropriate reaction solution for HR-MS test.

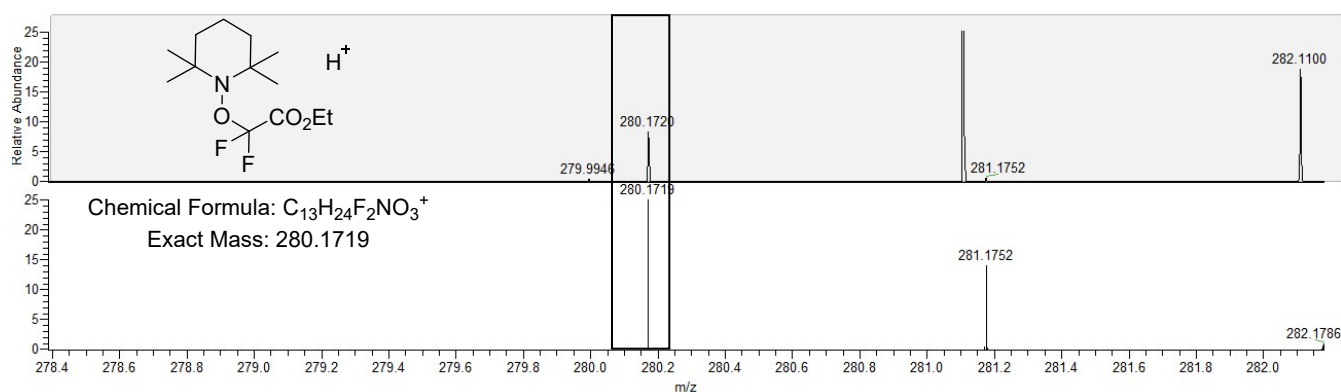

**Figure S1** Radical trapping experiment of HRMS in-situ capture spectrogram

## 2.6.2 Synthesis of ruthenium complexes

### Synthesis of ruthenium(II) **Int A**<sup>[3]</sup>

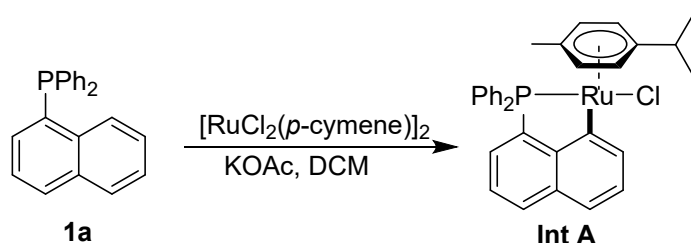

To a 50 mL Schlenk flask was added 1-naphthalenyldiphenylphosphane **1a** (2 mmol, 625 mg, 1.0 equiv),  $[RuCl_2(p\text{-cymene})]_2$  (1 mmol, 612 mg, 0.5 equiv), KOAc (4 mmol, 392 mg, 2.0 equiv). The tube was purged with Ar three times, followed by addition of 30 mL DCM. The mixture was stirred vigorously in room temperature for 48 h. The solvent was then removed under vacuum directly. The crude product was purified by neutral alumina ( $Al_2O_3$ ) column chromatography ( $R_f = 0.5$ , EA/hexane = 1/2) affording the product **Int A** as pale yellow powder (583 mg, 50% yield).

**Int A** as the catalyst

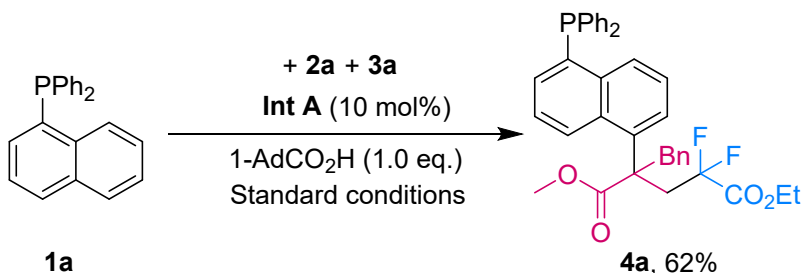

To a 25 mL Schlenk tubes were added naphthalen-1-ylidiphenylphosphane **1a** (0.1 mmol, 31.2 mg, 1.0 equiv), **2a** (0.3 mmol, 51  $\mu$ L, 3.0 equiv), **3a** (0.3 mmol, 39  $\mu$ L, 3.0 equiv), **Int A** (11.7 mg, 10 mol%), 1-AdCOOH (5.4 mg, 30 mol%), and NaOAc (16.4 mg, 2.0 equiv). The tube was purged with Ar three times, followed by addition of  $PhCF_3$  (1 mL). The mixture was stirred at 120  $^\circ$ C in heating module for 12 h. The solution was then cooled to room temperature and the solvent was removed under vacuum directly. The yield of alkylated product **3a** was 62% by  $^1H$  NMR yield analyzed.

Int A as the substrate

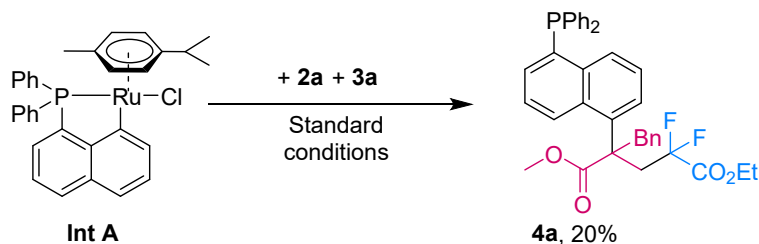

To a 25 mL Schlenk tubes were added **Int A** (0.1 mmol, 58.3 mg, 1.0 equiv), **2a** (0.3 mmol, 51  $\mu$ L, 3.0 equiv), **3a** (0.3 mmol, 39  $\mu$ L, 3.0 equiv), **1a** (0.1 mmol, 31.2 mg, 1.0 equiv) and NaOAc (16.4 mg, 2.0 equiv). The tube was purged with Ar three times, followed by addition of PhCF<sub>3</sub> (1 mL). The mixture was stirred at 80 °C in heating module for 12 h. The solution was then cooled to room temperature and the solvent was removed under vacuum directly. The yield of alkylated product **4a** was 20% by <sup>1</sup>H NMR yield analyzed.

## 2.6.3 H/D exchange experiment

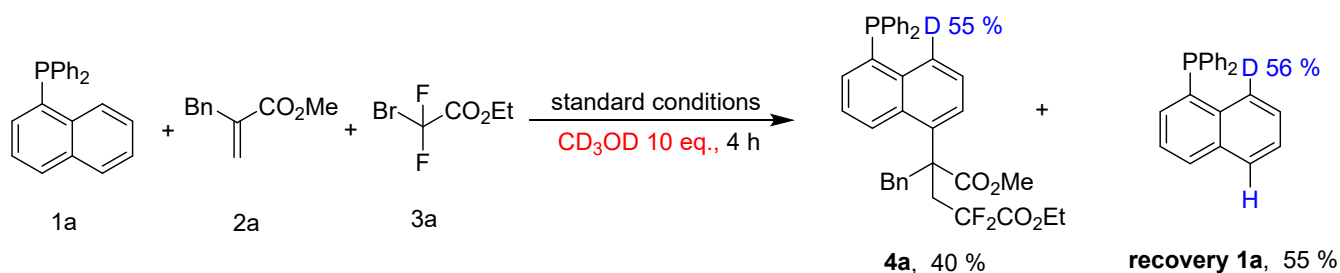

A mixture of 1-naphthalenyldiphenylphosphane **1a** (31.2mg, 0.1 mmol, 1.0 equiv), **2a** (0.3 mmol, 51  $\mu$ L, 3.0 equiv), **3a** (0.3 mmol, 39  $\mu$ L, 3.0 equiv), [RuCl<sub>2</sub>(*p*-cymene)]<sub>2</sub> (3.0 mg, 5.0 mol%), CD<sub>3</sub>OD (37mg, 1.0 mmol, 10.0 equiv), NaOAc (16.4 mg, 2.0 equiv) in PhCF<sub>3</sub> (1.0 mL) was stirred at 80 °C in heating mantle for 4 h under an atmosphere of argon. At ambient temperature, EtOAc (15 mL) was added, and the mixture was filtered through a short pad of silica gel. The solvent was removed in vacuo and the residue was purified by prepared column chromatography to afford the mixture products **4a-D8** in 40% yield and recovery 1a-D in 55% yield, which was analyzed by <sup>1</sup>H NMR spectroscopy.

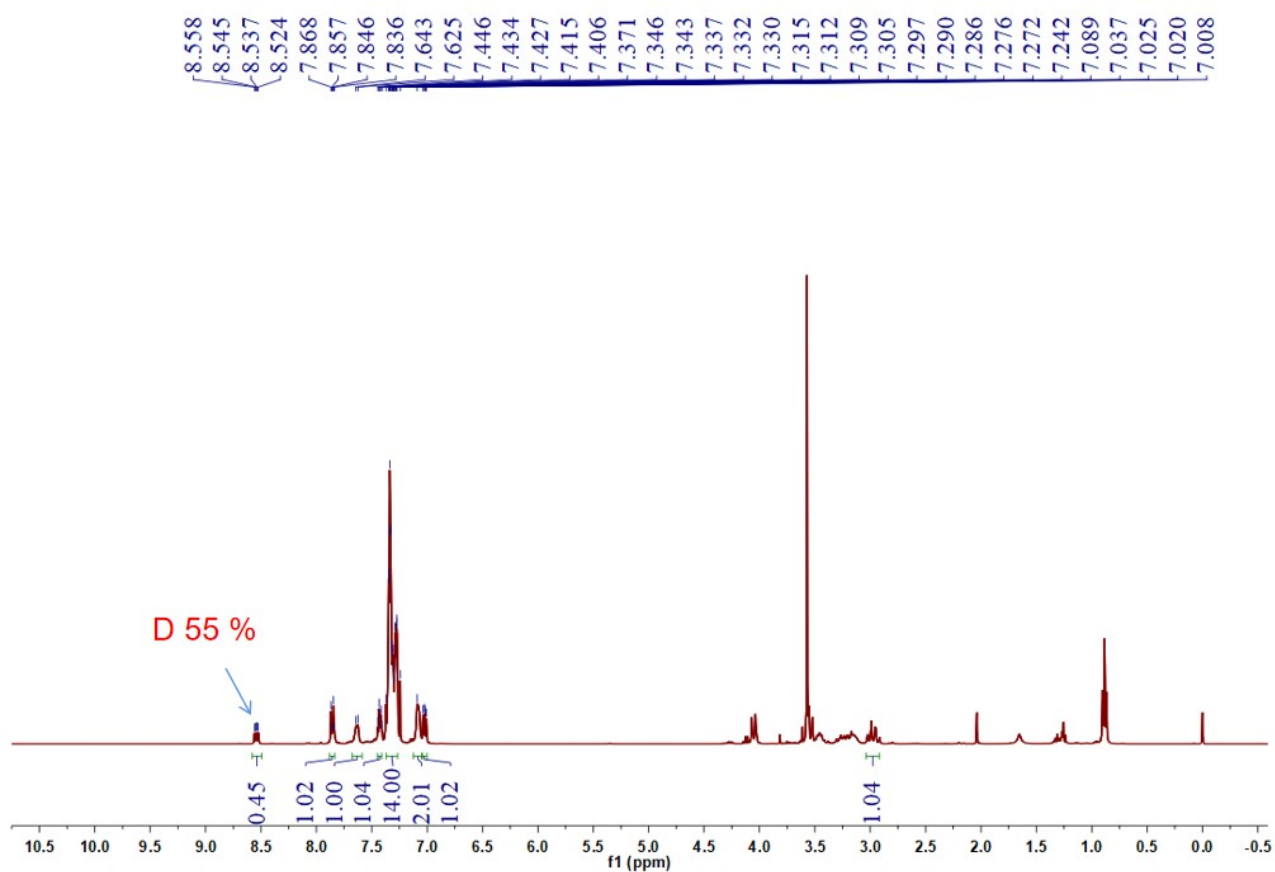

**Figure S2**  $^1\text{H}$  NMR spectroscopy of 4a-D8

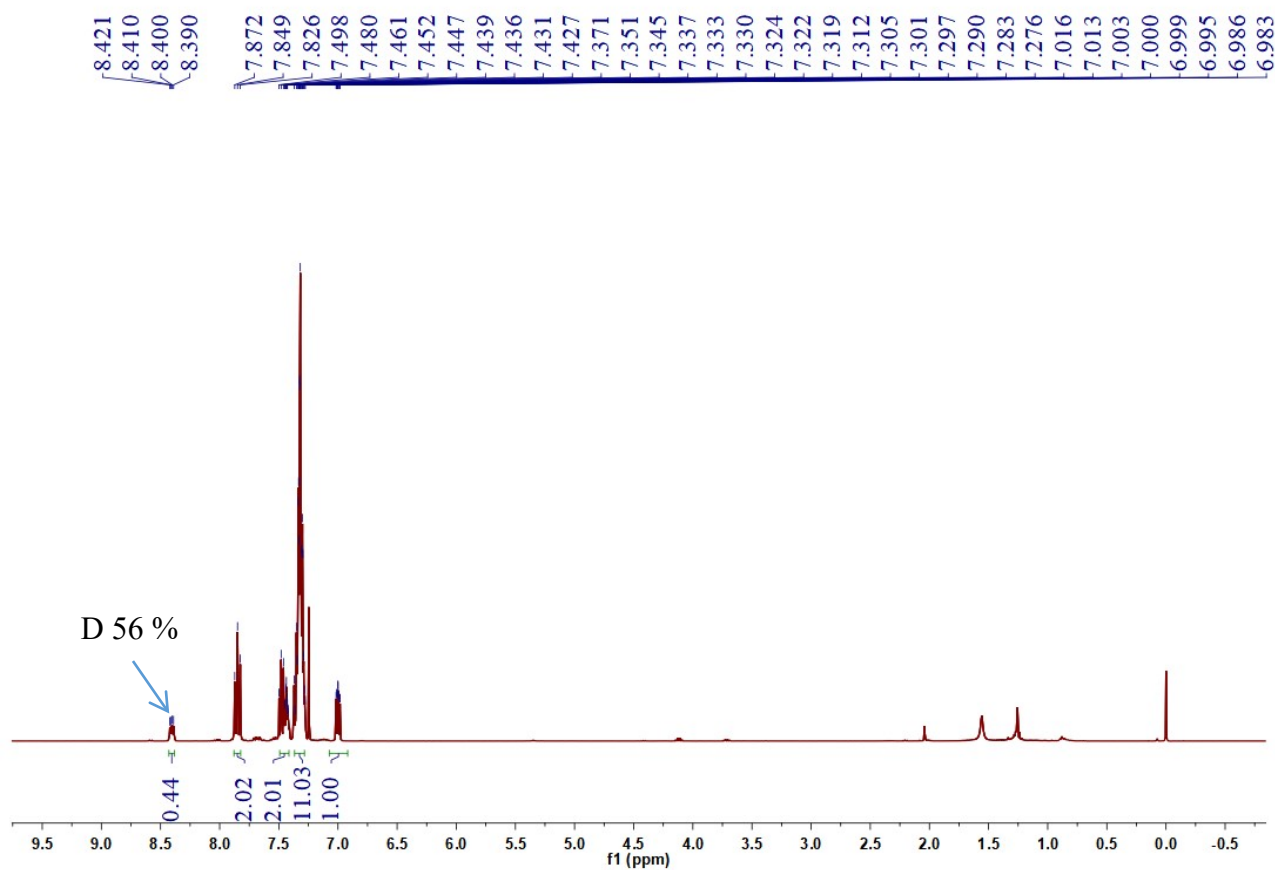

**Figure S3**  $^1\text{H}$  NMR spectroscopy of recovery 1a-D



## 2.6.4 Kinetic isotopic effect studies

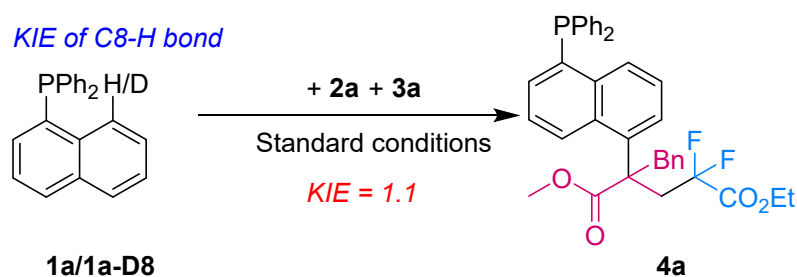

Kinetic isotopic effect was determined by performing two independent experiments of naphthalen-1-ylidiphenylphosphane **1a** (0.1 mmol) or deuterated naphthalen-1-ylidiphenylphosphane **1a-d8** (0.1 mmol) as a substrate. A mixture of **2a** (0.3 mmol, 51  $\mu$ L, 3.0 equiv), **3a** (0.3 mmol, 39  $\mu$ L, 3.0 equiv), [RuCl<sub>2</sub>(*p*-cymene)]<sub>2</sub> (3.0 mg, 5.0 mol%), NaOAc (16.4 mg, 2.0 equiv) in PhCF<sub>3</sub> (1.0 mL) was stirred at 80 °C in heating mantle for 4 h under an atmosphere of argon. Yields determined by <sup>1</sup>H NMR using CH<sub>2</sub>Br<sub>2</sub> as the internal standard were recorded at predetermined time intervals for 4 h to evaluate the yield of the reaction. The yield of alkylated product using starting material **1a** was 44%, The yield of alkylated product using starting material **1a-d8** was 40%. The *k<sub>H</sub>*/*k<sub>D</sub>* ratio of 1.1 was obtained.

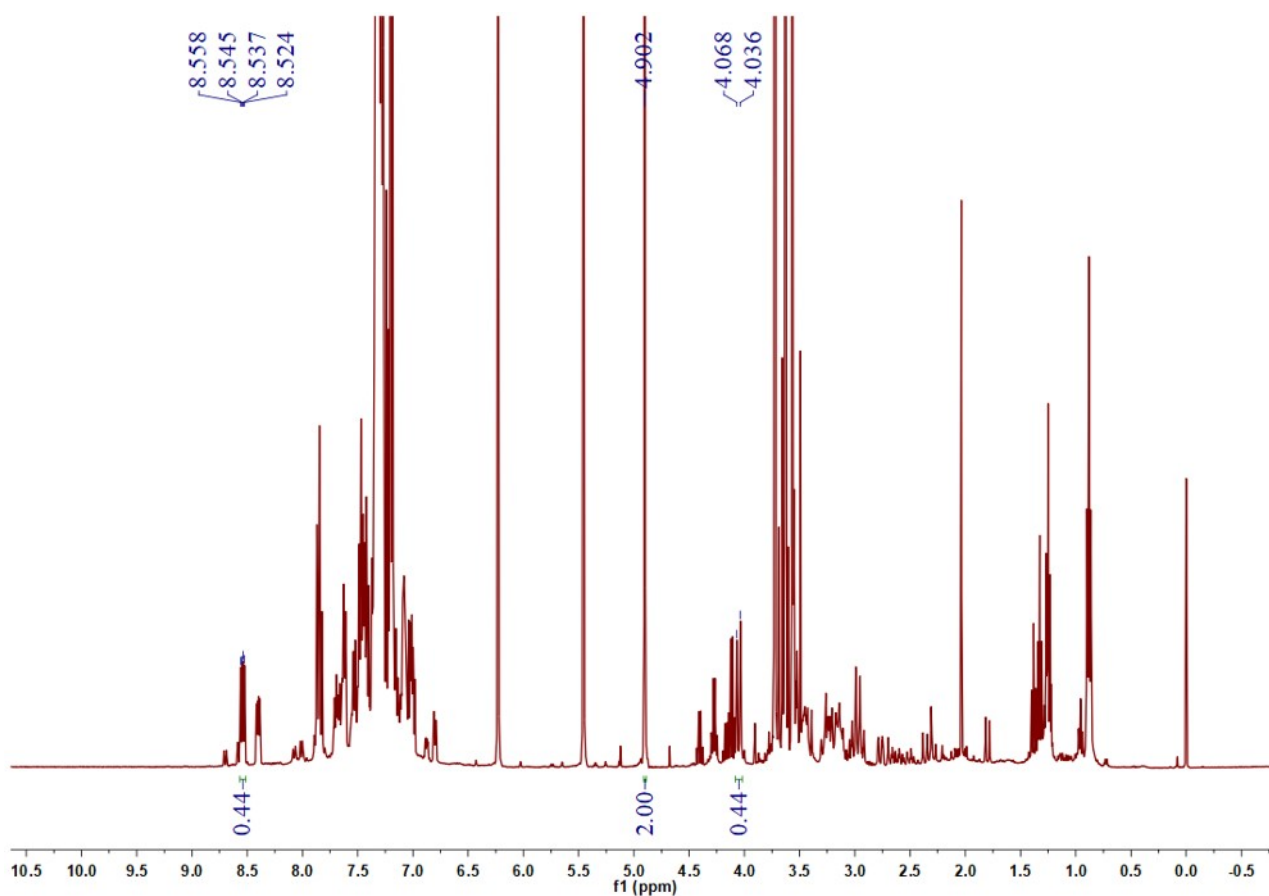

**Figure S4** <sup>1</sup>H NMR spectroscopy of using starting material **1a**

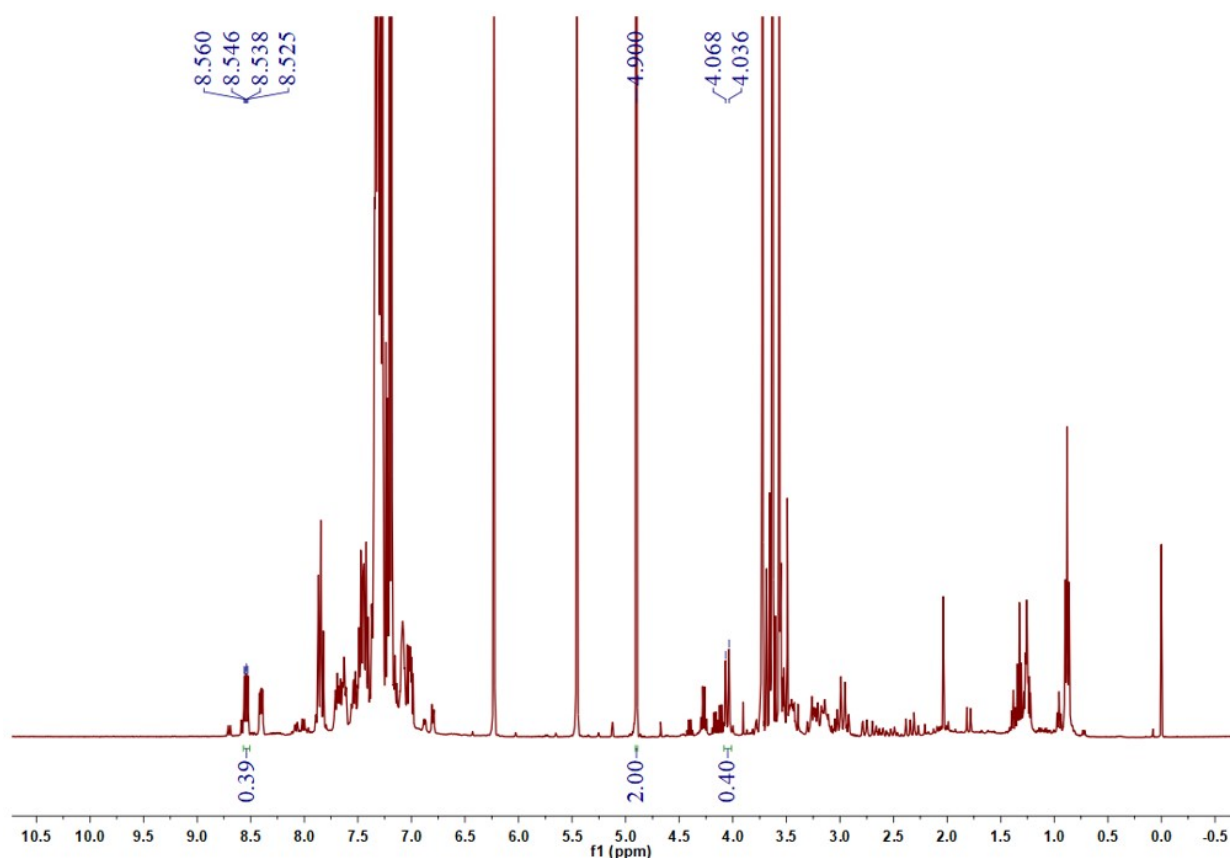

**Figure S5**  $^1\text{H}$  NMR spectroscopy of using starting material **1a-d8**

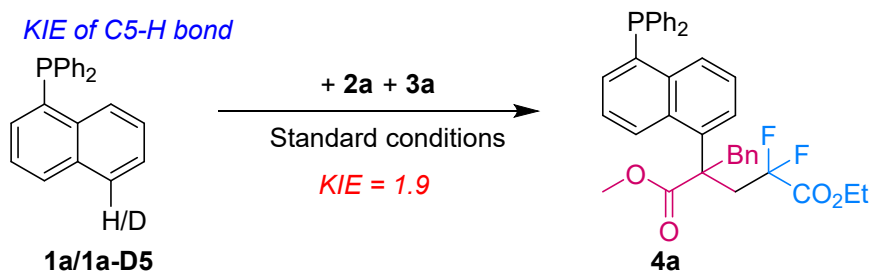

Kinetic isotopic effect was determined by performing two independent experiments of naphthalen-1-ylidiphenylphosphane **1a** (0.1 mmol) or deuterated naphthalen-1-ylidiphenylphosphane **1a-d5** (0.1 mmol) as a substrate. A mixture of **2a** (0.3 mmol, 51  $\mu\text{L}$ , 3.0 equiv), **3a** (0.3 mmol, 39  $\mu\text{L}$ , 3.0 equiv),  $[\text{RuCl}_2(p\text{-cymene})]_2$  (3.0 mg, 5.0 mol%), NaOAc (16.4 mg, 2.0 equiv) in  $\text{PhCF}_3$  (1.0 mL) was stirred at 80  $^\circ\text{C}$  in heating mantle for 4 h under an atmosphere of argon. Yields determined by  $^1\text{H}$  NMR using  $\text{CH}_2\text{Br}_2$  as the internal standard were recorded at predetermined time intervals for 4 h to evaluate the yield of the reaction. The yield of alkylated product using starting material **1a** was 44%, The yield of alkylated product using starting material **1a-d5** was 23%. The  $k_{\text{H}}/k_{\text{D}}$  ratio of 1.9 was obtained.

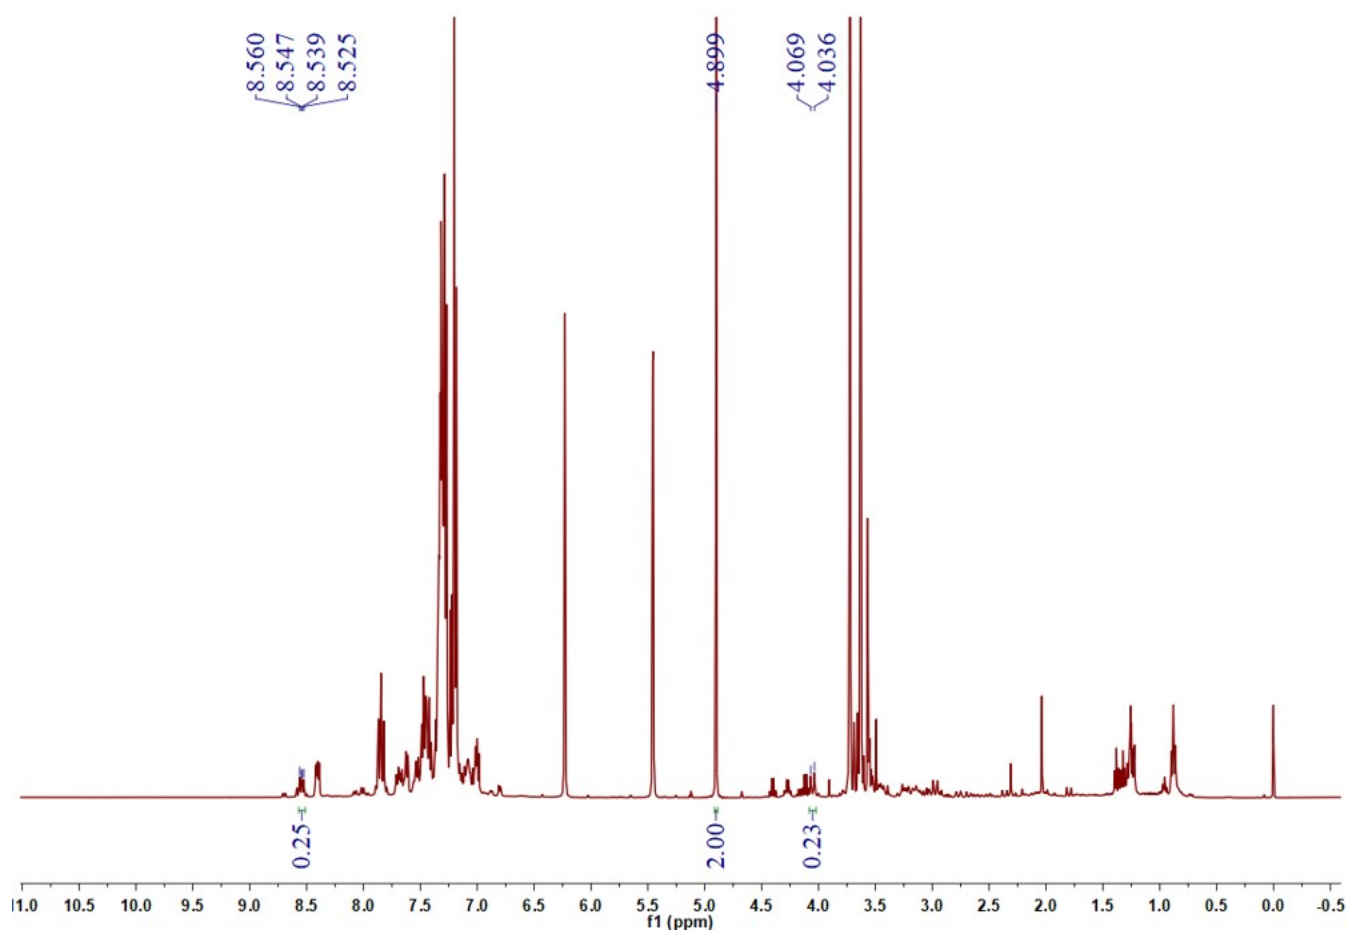

**Figure S6**  $^1\text{H}$  NMR spectroscopy of using starting material **1a-d5**

## 2.6.5 Intermolecular competition experiment

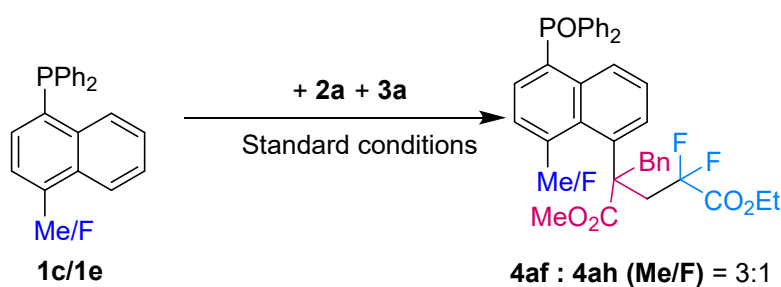

A mixture of (4-methylnaphthalen-1-yl)diphenylphosphane **1c** (32.6 mg, 0.1 mmol, 1.0 equiv), (4-fluoronaphthalen-1-yl)diphenylphosphane **1e** (33.0 mg, 0.1 mmol, 1.0 equiv), **2a** (0.6 mmol, 102  $\mu\text{L}$ , 6.0 equiv), **3a** (0.6 mmol, 78  $\mu\text{L}$ , 6.0 equiv),  $[\text{RuCl}_2(p\text{-cymene})]_2$  (6.0 mg, 10.0 mol%),  $\text{JNaOAc}$  (32.8 mg, 4.0 equiv) in  $\text{PhCF}_3$  (2.0 mL) was stirred at 80  $^\circ\text{C}$  in heating mantle for 12 h under an atmosphere of argon. At ambient temperature,  $\text{EtOAc}$  (15 mL) was added, and the mixture was filtered through a short pad of silica gel. The solvent was removed in vacuo and the residue was added 10 mL of DCM and 2 mL of  $\text{H}_2\text{O}_2$ , and after complete oxidation, add 10 mL of  $\text{H}_2\text{O}$  for liquid separation, remove the water phase, dry  $\text{Na}_2\text{SO}_4$ , and spin-dry the solvent in vacuum. The residue subject to  $^1\text{H}$  NMR test to determine the ratio of **4af** and **4ah**.

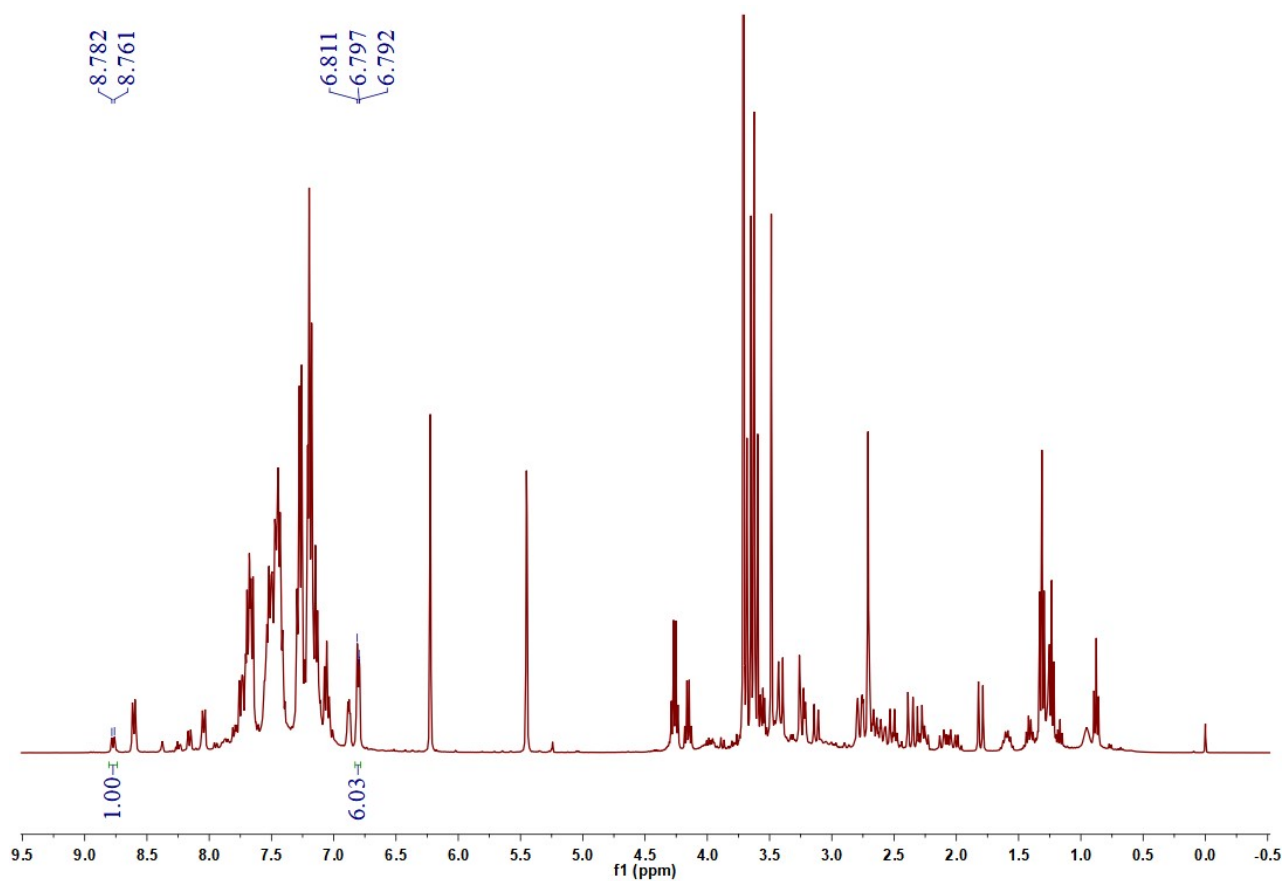

**Figure S7**  $^1\text{H}$  NMR spectrum of the mixture of compounds 4af and 4ah

### 3. Characterization data

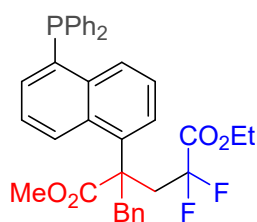

5-ethyl-1-methyl-2-benzyl-2-(5-(diphenylphosphanyl)naphthalen-1-yl)-4,4-difluoropentanedioate (**4a**)

The general procedure was applied to **1a** (31.2 mg, 0.1 mmol, 1 equiv), **2a** (52.8 mg, 0.3 mmol, 3.0 equiv), **3a** (60.9 mg, 0.3 mmol, 3.0 equiv), [RuCl<sub>2</sub>(*p*-cymene)]<sub>2</sub> (3.0 mg, 5.0 mol%), NaOAc (16.4 mg, 2.0 equiv) in PhCF<sub>3</sub> (1.0 mL) was stirred at 80 °C in heating mantle for 12 h under an atmosphere of argon. At ambient temperature, EtOAc (15 mL) was added, and the mixture was filtered through a short pad of silica gel. The solvent was removed in vacuo and the residue was purified by preparative chromatography (*R<sub>f</sub>* = 0.5, PE/DCM/EA = 10/1/1) afforded the product **4a** (49 mg, 80 % yield), <sup>1</sup>H NMR (400 MHz, CDCl<sub>3</sub>) 8.54 (dd, *J* = 8.4, 5.2 Hz, 1H), 7.85 (d, *J* = 8.8 Hz, 1H), 7.64 (d, *J* = 6.8 Hz, 1H), 7.46 - 7.41 (m, 1H), 7.37 - 7.31 (m, 10H), 7.29 - 7.27 (m, 4H), 7.09 (d, *J* = 4.4 Hz, 2H), 7.04 - 7.00 (m, 1H), 4.06 (d, *J* = 12.8 Hz, 1H), 3.57 (s, 3H), 3.56 - 3.52 (m, 1H), 3.49 - 3.40 (m, 1H), 3.31 - 3.08 (m, 2H), 2.97 (q, *J* = 14 Hz, 1H), 0.88 (t, *J* = 7.1 Hz, 3H). <sup>13</sup>C NMR (101 MHz, CDCl<sub>3</sub>) δ 175.6, 162.8 (t, *J* = 32.3 Hz), 136.5, 136.4, 136.3, 136.2, 136.0, 135.9, 134.6, 134.4, 134.3, 134.1, 131.9 (d, *J* = 4.0 Hz), 131.7, 130.9, 129.2, 129.0, 128.8, 128.7, 128.4, 127.4, 127.1, 126.2, 125.5 (d, *J* = 3.0 Hz), 124.5, 116.1 (dd, *J* = 215.1, 247.5 Hz), 62.6, 52.5, 52.1 (d, *J* = 5.0 Hz), 42.3 (d, *J* = 4.0 Hz), 36.7 (dd, *J* = 25.3, 20.2 Hz), 13.5. <sup>31</sup>P NMR (162 MHz, CDCl<sub>3</sub>) δ -13.1. <sup>19</sup>F NMR (377 MHz, CDCl<sub>3</sub>) δ -105.7, -106.5. HRMS (ESI) *m/z*: [M+H]<sup>+</sup> calcd for C<sub>37</sub>H<sub>34</sub>F<sub>2</sub>O<sub>4</sub>P<sup>+</sup> 611.2157; found 611.2153.

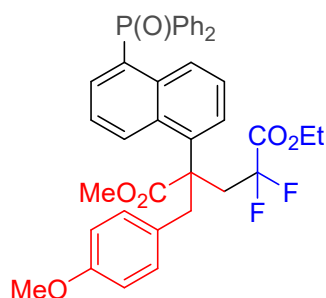

5-ethyl-1-methyl-2-(5-(diphenylphosphoryl)naphthalen-1-yl)-4,4-difluoro-2-(4-methoxybenzyl)pentanedioate (**4b**)

The general procedure was applied to **1a** (31.2 mg, 0.1 mmol, 1 equiv), **2b** (61.8 mg, 0.3 mmol, 3.0 equiv), **3a** (60.9 mg, 0.3 mmol, 3.0 equiv), [RuCl<sub>2</sub>(*p*-cymene)]<sub>2</sub> (3.0 mg, 5.0 mol%), NaOAc (16.4 mg, 2.0 equiv) in PhCF<sub>3</sub> (1.0 mL) was stirred at 80 °C in heating mantle for 12 h under an atmosphere of argon. At ambient temperature, EtOAc (15 mL) was added, and the mixture was filtered through a short pad of silica gel. The solvent was removed in vacuo and the residue was purified by preparative chromatography

( $R_f = 0.5$ , PE/DCM/EA = 8/1/1) afforded the product, the product was oxidized by adding 1mL  $H_2O_2$ , then DCM (10mL) and  $H_2O$  (10mL) were added for liquid separation to remove the water phase, The solvent was removed in vacuo and the residue was purified by preparative chromatography ( $R_f = 0.3$ , PE/DCM/EA = 1/1/1) afforded the product **4b** (54 mg, 82 % yield),  $^1H$  NMR (400 MHz,  $CDCl_3$ )  $\delta$  8.69 (d,  $J = 8.6$  Hz, 1H), 8.07 (d,  $J = 8.7$  Hz, 1H), 7.74 - 7.61 (m, 5H), 7.60 - 7.54 (m, 2H), 7.51 - 7.37 (m, 6H), 7.33 - 7.27 (m, 1H), 6.97 (d,  $J = 8.2$  Hz, 2H), 6.82 (d,  $J = 8.6$  Hz, 2H), 3.96 (d,  $J = 13.2$  Hz, 1H), 3.80 (s, 3H), 3.56 (s, 3H), 3.53 - 3.08 (m, 4H), 2.95 (q,  $J = 13.2$  Hz, 1H), 0.96 (t,  $J = 7.2$  Hz, 3H).  $^{13}C$  NMR (126 MHz,  $CDCl_3$ )  $\delta$  175.7, 163.1 (t,  $J = 31.5$  Hz), 158.9, 136.7, 134.8 134.3 (d,  $J = 8.8$  Hz), 133.4, 133.3, 133.2, 132.7, 132.6, 132.4, 132.3, 132.2, 132.1, 131.9, 131.7 134.3 (d,  $J = 102.1$  Hz), 128.8, 128.7, 128.5 (d,  $J = 6.3$  Hz), 128.2, 127.6, 126.5, 124.7 (d,  $J = 15.1$  Hz), 116.1 (dd,  $J = 257.0, 248.2$  Hz), 113.9, 62.7, 55.3, 52.5, 52.2 (d,  $J = 5.0$  Hz), 41.5, 36.7 (t,  $J = 23.9$  Hz), 13.6.  $^{31}P$  NMR (202 MHz,  $CDCl_3$ )  $\delta$  32.8.  $^{19}F$  NMR (471 MHz,  $CDCl_3$ )  $\delta$  -105.5, -106.1. HRMS (ESI)  $m/z$ :  $[M+H]^+$  calcd for  $C_{38}H_{36}F_2O_6P^+$  657.2212; found 657.2215.

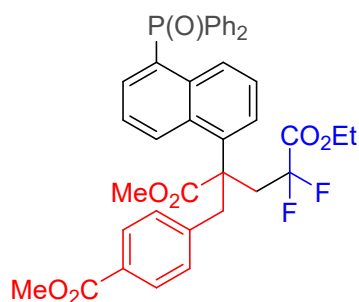

5-ethyl-1-methyl-2-(5-(diphenylphosphoryl)naphthalen-1-yl)-4,4-difluoro-2-(4-(methoxycarbonyl)benzyl)pentanedioate (**4c**)

The general procedure was applied to **1a** (31.2 mg, 0.1 mmol, 1 equiv), **2c** (70.2 mg, 0.3 mmol, 3.0 equiv), **3a** (60.9 mg, 0.3 mmol, 3.0 equiv),  $[RuCl_2(p\text{-cymene})]_2$  (3.0 mg, 5.0 mol%), NaOAc (16.4 mg, 2.0 equiv) in  $PhCF_3$  (1.0 mL) was stirred at 80 °C in heating mantle for 12 h under an atmosphere of argon. At ambient temperature, EtOAc (15 mL) was added, and the mixture was filtered through a short pad of silica gel. The solvent was removed in vacuo and the residue was purified by preparative chromatography ( $R_f = 0.5$ , PE/DCM/EA = 8/1/1) afforded the product, the product was oxidized by adding 1mL  $H_2O_2$ , then DCM (10mL) and  $H_2O$  (10mL) were added for liquid separation to remove the water phase, The solvent was removed in vacuo and the residue was purified by preparative chromatography ( $R_f = 0.3$ , PE/DCM/EA = 1/1/1) afforded the product **4c** (57 mg, 84 % yield),  $^1H$  NMR (400 MHz,  $CDCl_3$ )  $\delta$  8.72 (d,  $J = 8.6$  Hz, 1H), 8.06 (d,  $J = 8.6$  Hz, 1H), 7.94 (d,  $J = 8.2$  Hz, 2H), 7.73 - 7.66 (m, 4H), 7.61 - 7.53 (m, 3H), 7.52 - 7.45 (m, 4H), 7.44 - 7.38 (m, 2H), 7.31 (dd,  $J = 15.6, 6.4$  Hz, 1H), 7.09 (d,  $J = 7.8$  Hz, 2H), 4.06 (d,  $J = 13.0$  Hz, 1H), 3.91 (s, 3H), 3.66 - 3.40 (m, 6H), 3.16 (dd,  $J = 36.8, 16$  Hz, 1H), 2.90 (dd,  $J = 28.9, 16$  Hz, 1H), 1.00 (t,  $J = 7.2$  Hz, 3H).  $^{13}C$  NMR (126 MHz,  $CDCl_3$ )  $\delta$  175.3, 167.0, 163.0 (t,  $J = 31.5$  Hz), 141.3, 136.3, 134.8 (d,  $J = 7.6$  Hz), 133.4, 133.3 (d,  $J = 5.0$  Hz), 133.1, 132.5 (d,  $J = 2.5$  Hz),

132.4, 132.3, 132.2, 132.1, 131.3, 130.9, 130.5, 129.6, 129.3, 128.9, 128.8, 128.7, 128.0 (d,  $J = 1.3$  Hz), 126.5, 126.3, 125.0, 124.8, 116.0 (dd,  $J = 243.5, 249.5$  Hz), 62.9, 52.6, 52.2, 52.1 (d,  $J = 3.8$  Hz), 42.01 (d,  $J = 3.8$  Hz), 36.9 (dd,  $J = 21.4, 23.9$  Hz), 13.6.  **$^{31}\text{P}$  NMR** (202 MHz,  $\text{CDCl}_3$ )  $\delta$  32.8.  **$^{19}\text{F}$  NMR** (471 MHz,  $\text{CDCl}_3$ )  $\delta$  -105.3, -105.8. **HRMS** (ESI)  $m/z$ :  $[\text{M}+\text{H}]^+$  calcd for  $\text{C}_{39}\text{H}_{36}\text{F}_2\text{O}_7\text{P}^+$  685.2161; found 685.2158.

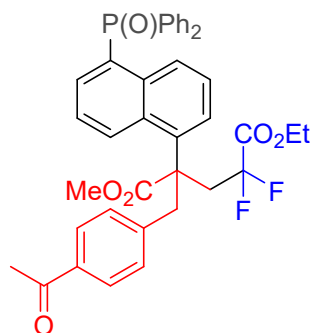

5-ethyl-1-methyl-2-(4-acetylbenzyl)-2-(5-(diphenylphosphoryl)naphthalen-1-yl)-4,4-difluoropentanedioate (**4d**)

The general procedure was applied to **1a** (31.2 mg, 0.1 mmol, 1 equiv), **2d** (65.4 mg, 0.3 mmol, 3.0 equiv), **3a** (60.9 mg, 0.3 mmol, 3.0 equiv),  $[\text{RuCl}_2(p\text{-cymene})]_2$  (3.0 mg, 5.0 mol%), NaOAc (16.4 mg, 2.0 equiv) in  $\text{PhCF}_3$  (1.0 mL) was stirred at 80 °C in heating mantle for 12 h under an atmosphere of argon. At ambient temperature, EtOAc (15 mL) was added, and the mixture was filtered through a short pad of silica gel. The solvent was removed in vacuo and the residue was purified by preparative chromatography ( $R_f = 0.5$ , PE/DCM/EA = 8/1/1) afforded the product, the product was oxidized by adding 1mL  $\text{H}_2\text{O}_2$ , then DCM (10mL) and  $\text{H}_2\text{O}$  (10mL) were added for liquid separation to remove the water phase, The solvent was removed in vacuo and the residue was purified by preparative chromatography ( $R_f = 0.3$ , PE/DCM/EA = 1/1/1) afforded the product **4d** (55 mg, 82 % yield),  **$^1\text{H}$  NMR** (400 MHz,  $\text{CDCl}_3$ )  $\delta$  8.73 (d,  $J = 8.6$  Hz, 1H), 8.06 (d,  $J = 8.6$  Hz, 1H), 7.86 (d,  $J = 8.2$  Hz, 2H), 7.73 - 7.67 (m, 4H), 7.61 - 7.55 (m, 3H), 7.52 - 7.45 (m, 4H), 7.44 - 7.38 (m, 2H), 7.31 (dd,  $J = 15.6, 6.4$  Hz, 1H), 7.11 (d,  $J = 7.6$  Hz, 2H), 4.06 (d,  $J = 12.8$  Hz, 1H), 3.66 - 3.40 (m, 6H), 3.23 - 3.10 (m, 1H), 2.91 (dd,  $J = 28.8, 15.6$  Hz, 1H), 2.59 (s, 3H), 0.99 (t,  $J = 7.2$  Hz, 3H).  **$^{13}\text{C}$  NMR** (126 MHz,  $\text{CDCl}_3$ )  $\delta$  197.9, 175.4, 163.0 (t,  $J = 31.5$  Hz), 141.5, 136.3, 134.9 (d,  $J = 8.8$  Hz), 133.4, 133.3, 133.1, 132.5, 132.4, 132.3, 132.2, 132.1, 131.1, 130.4 (d,  $J = 25.2$  Hz), 128.9, 128.8, 128.7, 128.4, 128.0, 126.5, 126.3, 124.9 (d,  $J = 13.9$  Hz), 116.0 (dd,  $J = 248.2, 257.0$  Hz), 62.9, 52.7, 52.1 (d,  $J = 3.8$  Hz), 42.0 (d,  $J = 2.5$  Hz), 37.0 (t,  $J = 45.4$  Hz), 26.7, 13.6.  **$^{31}\text{P}$  NMR** (202 MHz,  $\text{CDCl}_3$ )  $\delta$  32.8.  **$^{19}\text{F}$  NMR** (471 MHz,  $\text{CDCl}_3$ )  $\delta$  -105.2, -105.8. **HRMS** (ESI)  $m/z$ :  $[\text{M}+\text{H}]^+$  calcd for  $\text{C}_{39}\text{H}_{36}\text{F}_2\text{O}_6\text{P}^+$  669.2212; found 669.2206.

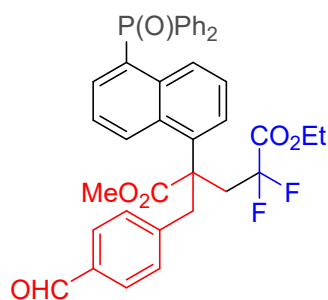

5-ethyl-1-methyl-2-(5-(diphenylphosphoryl)naphthalen-1-yl)-4,4-difluoro-2-(4-formylbenzyl)pentanedioate (**4e**)

The general procedure was applied to **1a** (31.2 mg, 0.1 mmol, 1 equiv), **2e** (61.2 mg, 0.3 mmol, 3.0 equiv), **3a** (60.9 mg, 0.3 mmol, 3.0 equiv), [RuCl<sub>2</sub>(*p*-cymene)]<sub>2</sub> (3.0 mg, 5.0 mol%), NaOAc (16.4 mg, 2.0 equiv) in PhCF<sub>3</sub> (1.0 mL) was stirred at 80 °C in heating mantle for 12 h under an atmosphere of argon. At ambient temperature, EtOAc (15 mL) was added, and the mixture was filtered through a short pad of silica gel. The solvent was removed in vacuo and the residue was purified by preparative chromatography (*R*<sub>f</sub> = 0.5, PE/DCM/EA = 8/1/1) afforded the product, the product was oxidized by adding 1mL H<sub>2</sub>O<sub>2</sub>, then DCM (10mL) and H<sub>2</sub>O (10mL) were added for liquid separation to remove the water phase, The solvent was removed in vacuo and the residue was purified by preparative chromatography (*R*<sub>f</sub> = 0.3, PE/DCM/EA = 1/1/1) afforded the product **4e** (54 mg, 82 % yield), <sup>1</sup>H NMR (400 MHz, CDCl<sub>3</sub>) δ 10.00 (s, 1H), 8.73 (d, *J* = 8.6 Hz, 1H), 8.06 (d, *J* = 8.6 Hz, 1H), 7.78 (d, *J* = 8.0 Hz, 2H), 7.74 - 7.66 (m, 4H), 7.60 - 7.39 (m, 9H), 7.31 (dd, *J* = 15.6, 6.4 Hz, 1H), 7.17 (d, *J* = 7.6 Hz, 2H), 4.08 (d, *J* = 12.8 Hz, 1H), 3.71 - 3.38 (m, 6H), 3.16 (dd, *J* = 36.4, 16.0 Hz, 1H), 2.90 (dd, *J* = 29.0, 15.8 Hz, 1H), 1.00 (t, *J* = 7.2 Hz, 3H). <sup>13</sup>C NMR (101 MHz, CDCl<sub>3</sub>) δ 192.0, 175.3, 163.0 (t, *J* = 32.3 Hz), 143.2, 136.1, 135.5, 134.8 (d, *J* = 8.1 Hz), 133.4 (d, *J* = 12.1 Hz), 133.3 (d, *J* = 22.7 Hz), 132.4 - 132.0 (m), 131.5, 130.9 (d, *J* = 102.0 Hz), 129.7, 128.9, 128.8, 128.7, 127.9 (d, *J* = 2.0 Hz), 126.4, 126.3, 125.0, 124.9, 63.0, 52.7, 52.1 (d, *J* = 4.0 Hz), 42.2 (d, *J* = 3.0 Hz), 37.0 (t, *J* = 24.2 Hz), 13.6. <sup>31</sup>P NMR (162 MHz, CDCl<sub>3</sub>) δ 32.8. <sup>19</sup>F NMR (377 MHz, CDCl<sub>3</sub>) δ -105.2, -105.9. HRMS (ESI) *m/z*: [M+H]<sup>+</sup> calcd for C<sub>38</sub>H<sub>34</sub>F<sub>2</sub>O<sub>6</sub>P<sup>+</sup> 655.2056; found 655.2054.

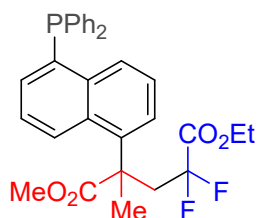

5-ethyl-1-methyl-2-(5-(diphenylphosphanyl)naphthalen-1-yl)-4,4-difluoro-2-methylpentanedioate (**4f**)

The general procedure was applied to **1a** (31.2 mg, 0.1 mmol, 1 equiv), **2f** (30 mg, 0.3 mmol, 3.0 equiv), **3a** (60.9 mg, 0.3 mmol, 3.0 equiv), [RuCl<sub>2</sub>(*p*-cymene)]<sub>2</sub> (3.0 mg, 5.0 mol%), NaOAc (16.4 mg, 2.0 equiv) in PhCF<sub>3</sub> (1.0 mL) was stirred at 80 °C in heating mantle for 12 h under an atmosphere of argon. At ambient temperature, EtOAc (15 mL) was added, and the mixture was filtered through a short pad of



silica gel. The solvent was removed in vacuo and the residue was purified by preparative chromatography ( $R_f = 0.5$ , PE/DCM/EA = 10/1/1) afforded the product **4f** (39 mg, 73 % yield),  $^1\text{H}$  NMR (400 MHz,  $\text{CDCl}_3$ )  $\delta$  8.51 (dd,  $J = 8.4, 5.2$  Hz, 1H), 7.74 (d,  $J = 8.8$  Hz, 1H), 7.56 (d,  $J = 7.2$  Hz, 1H), 7.45 - 7.40 (m, 1H), 7.38 - 7.29 (m, 11H), 7.01 (dd,  $J = 6.8, 5.0$  Hz, 1H), 3.59 (s, 3H), 3.56 - 3.48 (m, 1H), 3.37 - 3.24 (m, 1H), 3.18 - 3.07 (m, 2H), 1.97 (s, 3H), 0.84 (t,  $J = 7.2$  Hz, 3H).  $^{13}\text{C}$  NMR (101 MHz,  $\text{CDCl}_3$ )  $\delta$  177.8, 163.0 (dd,  $J = 31.3, 34.3$  Hz), 136.6, 136.4, 136.3, 136.2, 136.1, 134.5, 134.4, 134.3, 134.2, 131.7, 131.5 (d,  $J = 4.0$  Hz), 129.1, 129.0, 128.8, 128.7, 127.1 (d,  $J = 30.3$  Hz), 126.1, 125.9, 125.5 (d,  $J = 3.0$  Hz), 124.5, 115.8 (dd,  $J = 247.5, 255.5$  Hz), 62.5, 53.0, 47.6 (d,  $J = 7.1$  Hz), 41.4 (dd,  $J = 21.2, 25.3$  Hz), 25.2 (d,  $J = 4.0$  Hz), 13.5.  $^{31}\text{P}$  NMR (162 MHz,  $\text{CDCl}_3$ )  $\delta$  -13.3.  $^{19}\text{F}$  NMR (377 MHz,  $\text{CDCl}_3$ )  $\delta$  -93.2, -93.8, -93.9 -103.0, -103.1, -103.7, -103.8. HRMS (ESI)  $m/z$ :  $[\text{M}+\text{H}]^+$  calcd for  $\text{C}_{31}\text{H}_{30}\text{F}_2\text{O}_4\text{P}^+$  535.1844; found 535.1837.

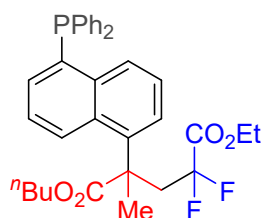

5-ethyl 1-methyl 2-benzyl-2-(5-(diphenylphosphanyl)naphthalen-1-yl)-4,4-difluoropentanedioate (**4g**)

The general procedure was applied to **1a** (31.2 mg, 0.1 mmol, 1 equiv), **2g** (42.6 mg, 0.3 mmol, 3.0 equiv), **3a** (60.9 mg, 0.3 mmol, 3.0 equiv),  $[\text{RuCl}_2(p\text{-cymene})]_2$  (3.0 mg, 5.0 mol%), NaOAc (16.4 mg, 2.0 equiv) in  $\text{PhCF}_3$  (1.0 mL) was stirred at 80 °C in heating mantle for 12 h under an atmosphere of argon. At ambient temperature, EtOAc (15 mL) was added, and the mixture was filtered through a short pad of silica gel. The solvent was removed in vacuo and the residue was purified by preparative chromatography ( $R_f = 0.5$ , PE/DCM/EA = 10/1/1) afforded the product **4g** (35 mg, 61 % yield),  $^1\text{H}$  NMR (400 MHz,  $\text{CDCl}_3$ )  $\delta$  8.48 (dd,  $J = 8.4, 5.2$  Hz, 1H), 7.79 (d,  $J = 8.6$  Hz, 1H), 7.55 (d,  $J = 7.2$  Hz, 1H), 7.41 (dd,  $J = 8.4, 7.6$  Hz, 1H), 7.37 - 7.28 (m, 9H), 7.26 - 7.23 (m, 2H), 7.00 (ddd,  $J = 7.2, 4.4, 0.8$  Hz, 1H), 4.07 - 3.97 (m, 2H), 3.57 - 3.49 (m, 1H), 3.39 - 3.26 (m, 1H), 3.17 - 3.05 (m, 2H), 1.96 (s, 3H), 1.37 - 1.29 (m, 2H), 0.93 - 0.80 (m, 5H), 0.64 (t,  $J = 7.2$  Hz, 3H).  $^{13}\text{C}$  NMR (101 MHz,  $\text{CDCl}_3$ )  $\delta$  177.5, 163.1 (dd,  $J = 34.3, 31.3$  Hz), 136.5, 136.4, 136.3, 136.2, 136.0, 134.6, 134.4, 134.2, 134.0, 131.6, 131.5 (d,  $J = 4$  Hz), 129.2, 129.0, 128.8, 128.7, 127.1, 126.8, 125.9, 125.5 (d,  $J = 2$  Hz), 124.9, 115.9 (dd,  $J = 255.5, 246.4$  Hz), 65.6, 62.5, 58.6, 47.7 (d,  $J = 8.1$  Hz), 41.3 (dd,  $J = 26.3, 21.2$  Hz), 30.3, 25.3 (d,  $J = 5.1$  Hz), 18.8, 13.5.  $^{31}\text{P}$  NMR (162 MHz,  $\text{CDCl}_3$ )  $\delta$  -13.2.  $^{19}\text{F}$  NMR (377 MHz,  $\text{CDCl}_3$ )  $\delta$  -93.3 (d,  $J = 267.7$  Hz), -103.4 (d,  $J = 267.7$  Hz). HRMS (ESI)  $m/z$ :  $[\text{M}+\text{H}]^+$  calcd for  $\text{C}_{34}\text{H}_{36}\text{F}_2\text{O}_4\text{P}^+$  577.2314; found 577.2311.

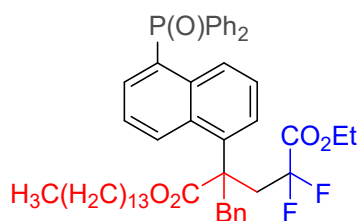

5-ethyl-1-tetradecyl-2-benzyl-2-(5-(diphenylphosphoryl)naphthalen-1-yl)-4,4-difluoropentanedioate (**4h**)

The general procedure was applied to **1a** (31.2 mg, 0.1 mmol, 1 equiv), **2h** (107.4 mg, 0.3 mmol, 3.0 equiv), **3a** (60.9 mg, 0.3 mmol, 3.0 equiv), [RuCl<sub>2</sub>(*p*-cymene)]<sub>2</sub> (3.0 mg, 5.0 mol%), NaOAc (16.4 mg, 2.0 equiv) in PhCF<sub>3</sub> (1.0 mL) was stirred at 80 °C in heating mantle for 12 h under an atmosphere of argon. At ambient temperature, EtOAc (15 mL) was added, and the mixture was filtered through a short pad of silica gel. The solvent was removed in vacuo and the residue was purified by preparative chromatography (*R*<sub>f</sub> = 0.5, PE/DCM/EA = 10/1/1) afforded the product, the product was oxidized by adding 1mL H<sub>2</sub>O<sub>2</sub>, then DCM (10mL) and H<sub>2</sub>O (10mL) were added for liquid separation to remove the water phase, The solvent was removed in vacuo and the residue was purified by preparative chromatography (*R*<sub>f</sub> = 0.5, PE/DCM/EA = 1/1/1) afforded the product **4h** (40 mg, 50 % yield), **<sup>1</sup>H NMR** (400 MHz, CDCl<sub>3</sub>) δ 8.72 (d, *J* = 8.6 Hz, 1H), 8.11 (d, *J* = 8.6 Hz, 1H), 7.72 - 7.53 (m, 7H), 7.50 - 7.26 (m, 10H), 7.17 - 6.94 (m, 2H), 4.09 - 3.88 (m, 3H), 3.59 - 3.11 (m, 4H), 2.97 (dd, *J* = 28.6, 15.2 Hz, 1H), 1.39 - 1.05 (m, 23H), 0.89 - 10.86 (m, 4H), 0.88 (t, *J* = 6.8 Hz, 3H). **<sup>13</sup>C NMR** (101 MHz, CDCl<sub>3</sub>) δ 175.0, 163.0 (t, *J* = 32.3 Hz), 136.7, 135.8, 134.8 (d, *J* = 8.1 Hz), 133.4 (d, *J* = 3.0 Hz), 133.2 (d, *J* = 12.1 Hz), 132.5 (d, *J* = 9.1 Hz), 132.3 (d, *J* = 3.0 Hz), 132.2, 132.1, 130.91 130.1 (d, *J* = 102.0 Hz), 128.8, 128.7, 128.6, 128.5, 128.4, 127.3, 126.5, 124.5 (d, *J* = 14.1 Hz), 116.1 (dd, *J* = 248.5, 257.6 Hz), 65.8, 62.7, 52.1 (d, *J* = 4.0 Hz), 42.2 (d, *J* = 2.0 Hz), 36.7 (t, *J* = 22.2 Hz), 32.0, 29.8, 29.7, 29.4, 29.1, 28.0, 25.7, 22.8, 14.2, 13.5. **<sup>31</sup>P NMR** (162 MHz, CDCl<sub>3</sub>) δ 32.7. **<sup>19</sup>F NMR** (377 MHz, CDCl<sub>3</sub>) δ -105.4, -106.1. **HRMS** (ESI) *m/z*: [M+H]<sup>+</sup> calcd for C<sub>50</sub>H<sub>60</sub>F<sub>2</sub>O<sub>5</sub>P<sup>+</sup> 809.4141; found 809.4128.

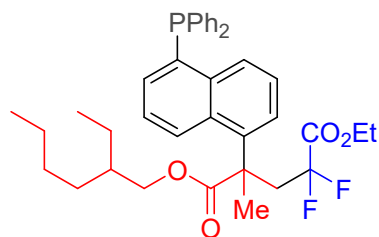

5-ethyl-1-(2-ethylhexyl)-2-(5-(diphenylphosphanylnaphthalen-1-yl)-4,4-difluoro-2-methylpentanedioate (**4i**)

The general procedure was applied to **1a** (31.2 mg, 0.1 mmol, 1 equiv), **2i** (59.4 mg, 0.3 mmol, 3.0 equiv), **3a** (60.9 mg, 0.3 mmol, 3.0 equiv), [RuCl<sub>2</sub>(*p*-cymene)]<sub>2</sub> (3.0 mg, 5.0 mol%), NaOAc (16.4 mg, 2.0 equiv) in PhCF<sub>3</sub> (1.0 mL) was stirred at 80 °C in heating mantle for 12 h under an atmosphere of argon. At ambient temperature, EtOAc (15 mL) was added, and the mixture was filtered through a short pad of silica gel. The solvent was removed in vacuo and the residue was purified by preparative chromatography

( $R_f = 0.5$ , PE/DCM/EA = 10/1/1) afforded the product **4i** (dr = 1:1) (36 mg, 57 % yield),  $^1\text{H NMR}$  (400 MHz,  $\text{CDCl}_3$ )  $\delta$  8.54 - 8.39 (m, 2H), 7.79 (dd,  $J = 8.8, 2.8$  Hz, 2H), 7.55 (d,  $J = 7.2$  Hz, 2H), 7.46 - 7.37 (m, 2H), 7.37 - 7.21 (m, 22H), 7.02 - 6.95 (m, 2H), 4.01 - 3.79 (m, 4H), 3.62 - 3.45 (m, 2H), 3.42 - 3.23 (m, 2H), 3.20 - 3.01 (m, 4H), 1.96 (s, 6H), 1.34 - 1.21 (m, 4H), 1.12 - 0.96 (m, 6H), 0.95 - 0.84 (m, 8H), 0.82 (t,  $J = 7.2$  Hz, 6H), 0.78 - 0.63 (m, 6H), 0.58 (t,  $J = 7.5$  Hz, 3H), 0.51 (t,  $J = 7.4$  Hz, 3H).  $^{13}\text{C NMR}$  (101 MHz,  $\text{CDCl}_3$ )  $\delta$  177.6, 163.1 (dd,  $J = 33.3, 30.3$  Hz), 136.5, 136.4, 136.3, 136.2, 136.0, 134.6, 134.4, 134.3, 134.2, 134.1, 134.0, 131.6, 131.5, 129.1, 129.0, 128.8, 128.7, 128.6, 127.0, 126.7, 126.0, 125.9, 125.4, 125.4, 124.8, 115.9 (dd,  $J = 255.5, 247.5$  Hz), 67.9, 67.8, 62.5, 47.7, 47.6, 41.3 (dd,  $J = 24.2, 21.2$  Hz), 38.5, 38.4, 30.7, 30.1, 28.9, 28.7, 25.3, 23.6, 23.5, 22.9, 14.1, 13.4, 10.9, 10.7.  $^{31}\text{P NMR}$  (162 MHz,  $\text{CDCl}_3$ )  $\delta$  -13.0, -13.1.  $^{19}\text{F NMR}$  (377 MHz,  $\text{CDCl}_3$ )  $\delta$  -93.3 (d,  $J = 263.9$  Hz), -93.4 (d,  $J = 267.7$  Hz), -102.3 (d,  $J = 267.7$  Hz), -103.3 (d,  $J = 263.9$  Hz). **HRMS** (ESI)  $m/z$ :  $[\text{M}+\text{H}]^+$  calcd for  $\text{C}_{38}\text{H}_{44}\text{F}_2\text{O}_4\text{P}^+$  633.2940; found 633.2930.

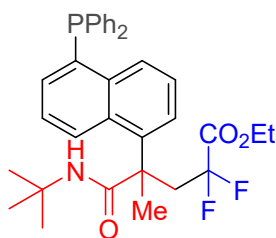

Ethyl-5-(tert-butylamino)-4-(5-(diphenylphosphanyl)naphthalen-1-yl)-2,2-difluoro-4-methyl-5-oxopentanoate (**4j**)

The general procedure was applied to **1a** (31.2 mg, 0.1 mmol, 1 equiv), **2j** (42.3 mg, 0.3 mmol, 3.0 equiv), **3a** (60.9 mg, 0.3 mmol, 3.0 equiv),  $[\text{RuCl}_2(p\text{-cymene})]_2$  (3.0 mg, 5.0 mol%), NaOAc (16.4 mg, 2.0 equiv) in  $\text{PhCF}_3$  (1.0 mL) was stirred at 80 °C in heating mantle for 12 h under an atmosphere of argon. At ambient temperature, EtOAc (15 mL) was added, and the mixture was filtered through a short pad of silica gel. The solvent was removed in vacuo and the residue was purified by preparative chromatography ( $R_f = 0.5$ , PE/DCM/EA = 8/1/1) afforded the product **4j** (37 mg, 65 % yield),  $^1\text{H NMR}$  (400 MHz,  $\text{CDCl}_3$ )  $\delta$  8.53 (dd,  $J = 8.4, 5.2$  Hz, 1H), 7.88 (d,  $J = 8.6$  Hz, 1H), 7.61 (d,  $J = 7.2$  Hz, 1H), 7.44 - 7.41 (m, 1H), 7.40 - 7.37 (m, 1H), 7.37 - 7.29 (m, 8H), 7.28 - 7.24 (m, 2H), 7.00 - 6.97 (m, 1H), 4.76 (s, 1H), 3.59 - 3.51 (m, 1H), 3.27 - 3.10 (m, 3H), 1.91 (s, 3H), 1.09 (s, 9H), 0.86 (t,  $J = 7.2$  Hz, 3H).  $^{13}\text{C NMR}$  (101 MHz,  $\text{CDCl}_3$ )  $\delta$  176.3, 163.3 (dd,  $J = 33.3, 31.3$  Hz), 136.7 (d,  $J = 1$  Hz), 136.3, 136.2, 136.1, 136.0, 134.5, 134.4, 134.3, 134.2, 131.9, 131.4 (d,  $J = 4$  Hz), 129.2, 129.1, 128.8, 128.7, 127.7, 127.4, 127.0, 126.4, 126.0 (d,  $J = 1$  Hz), 125.5 (d,  $J = 2$  Hz), 116.4 (dd,  $J = 254.5, 247.5$  Hz), 62.4, 51.2, 48.8, 48.7, 40.8 (dd,  $J = 24.2, 21.2$  Hz), 28.2, 26.6 (d,  $J = 4$  Hz), 13.5.  $^{31}\text{P NMR}$  (162 MHz,  $\text{CDCl}_3$ )  $\delta$  -13.3.  $^{19}\text{F NMR}$  (377 MHz,  $\text{CDCl}_3$ )  $\delta$  -94.2 (d,  $J = 263.9$  Hz), -102.9 (d,  $J = 263.9$  Hz). **HRMS** (ESI)  $m/z$ :  $[\text{M}+\text{H}]^+$  calcd for  $\text{C}_{34}\text{H}_{37}\text{F}_2\text{NO}_3\text{P}^+$  576.2474; found 576.2466.

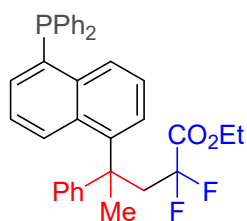

#### 5-ethyl 1-methyl 2-benzyl-2-(5-(diphenylphosphanyl)naphthalen-1-yl)-4,4-difluoropentanedioate (**4k**)

The general procedure was applied to **1a** (31.2 mg, 0.1 mmol, 1 equiv), **2k** (35.4 mg, 0.3 mmol, 3.0 equiv), **3a** (60.9 mg, 0.3 mmol, 3.0 equiv), [RuCl<sub>2</sub>(*p*-cymene)]<sub>2</sub> (3.0 mg, 5.0 mol%), NaOAc (16.4 mg, 2.0 equiv) in PhCF<sub>3</sub> (1.0 mL) was stirred at 80 °C in heating mantle for 12 h under an atmosphere of argon. At ambient temperature, EtOAc (15 mL) was added, and the mixture was filtered through a short pad of silica gel. The solvent was removed in vacuo and the residue was purified by preparative chromatography (*R<sub>f</sub>* = 0.5, PE/DCM/EA = 20/1/1) afforded the product **4k** (29 mg, 53 % yield), <sup>1</sup>H NMR (400 MHz, CDCl<sub>3</sub>) δ 8.52 (dd, *J* = 8.4, 5.2 Hz, 1H), 7.77 (d, *J* = 7.2 Hz, 1H), 7.47 (dd, *J* = 8.4, 7.6 Hz, 1H), 7.41 (d, *J* = 8.8 Hz, 1H), 7.33 - 7.21 (m, 12H), 7.17 - 7.14 (m, 3H), 7.00 - 6.94 (m, 1H), 6.88 - 6.96 (m, 1H), 3.66 - 3.53 (m, 1H), 3.39 - 3.30 (m, 1H), 3.26 - 3.16 (m, 1H), 3.09 - 3.01 (m, 1H), 1.94 (s, 3H), 0.85 (t, *J* = 7.2 Hz, 3H). <sup>13</sup>C NMR (101 MHz, CDCl<sub>3</sub>) δ 163.0 (t, *J* = 33.3 Hz), 150.4, 140.5, 137.0, 136.7, 136.6, 136.5, 136.4, 135.6, 135.4, 134.5, 134.3, 134.1, 131.5 (d, *J* = 4.0 Hz), 131.3, 129.0, 128.9, 128.8, 128.7, 128.6, 128.4, 127.0, 126.9, 126.7, 126.2, 125.6, 125.3 (d, *J* = 3.0 Hz), 124.6 (d, *J* = 1.0 Hz), 116.4 (dd, *J* = 256.5, 246.4 Hz), 62.4, 45.1, 45.0, 43.9 (t, *J* = 22.2 Hz), 43.6, 32.6, 13.5. <sup>31</sup>P NMR (162 MHz, CDCl<sub>3</sub>) δ -13.2. <sup>19</sup>F NMR (377 MHz, CDCl<sub>3</sub>) δ -91.9 (d, *J* = 267.7 Hz), -103.2 (d, *J* = 233.7 Hz). HRMS (ESI) *m/z*: [M+H]<sup>+</sup> calcd for C<sub>35</sub>H<sub>32</sub>F<sub>2</sub>O<sub>2</sub>P<sup>+</sup> 553.2102; found 553.2095.

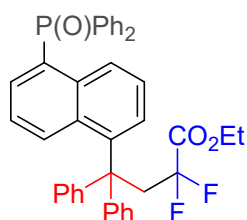

#### Ethyl-4-(5-(diphenylphosphoryl)naphthalen-1-yl)-2,2-difluoro-4,4-diphenylbutanoate (**4l**)

The general procedure was applied to **1a** (31.2 mg, 0.1 mmol, 1 equiv), **2l** (54.0 mg, 0.3 mmol, 3.0 equiv), **3a** (60.9 mg, 0.3 mmol, 3.0 equiv), [RuCl<sub>2</sub>(*p*-cymene)]<sub>2</sub> (3.0 mg, 5.0 mol%), NaOAc (16.4 mg, 2.0 equiv) in PhCF<sub>3</sub> (1.0 mL) was stirred at 80 °C in heating mantle for 12 h under an atmosphere of argon. At ambient temperature, EtOAc (15 mL) was added, and the mixture was filtered through a short pad of silica gel. The solvent was removed in vacuo and the residue was purified by preparative chromatography (*R<sub>f</sub>* = 0.5, PE/DCM/EA = 20/1/1) afforded the product, the product was oxidized by adding 1mL H<sub>2</sub>O<sub>2</sub>, then DCM (10mL) and H<sub>2</sub>O (10mL) were added for liquid separation to remove the water phase, The solvent was removed in vacuo and the residue was purified by preparative chromatography (*R<sub>f</sub>* = 0.5, PE/DCM/EA = 2/1/1) afforded the product **4l** (32 mg, 51 % yield), <sup>1</sup>H NMR (400 MHz, CDCl<sub>3</sub>) δ 8.66

(d,  $J = 8.6$  Hz, 1H), 7.71 - 7.65 (m, 5H), 7.61 (d,  $J = 7.2$  Hz, 1H), 7.57 - 7.53 (m, 2H), 7.49 - 7.44 (m, 4H), 7.41 - 7.31 (m, 5H), 7.24 - 7.20 (m, 4H), 7.17 - 7.08 (m, 3H), 6.99 - 6.94 (m, 1H), 3.93 (t,  $J = 15.2$  Hz, 2H), 3.54 (dd,  $J = 14.0$  Hz, 6.8 Hz, 2H), 1.02 (t,  $J = 7.2$  Hz, 3H).  $^{13}\text{C}$  NMR (126 MHz,  $\text{CDCl}_3$ )  $\delta$  163.5 (t,  $J = 32.8$  Hz), 145.0, 140.1, 135.3 (d,  $J = 7.6$  Hz), 133.5, 133.1, 133.0, 132.7, 132.3, 132.2, 132.1, 132.0, 130.8, 129.8 (d,  $J = 102.1$  Hz), 128.8, 128.7, 128.4 (d,  $J = 7.6$  K Hz), 128.2, 126.4, 126.2, 122.6 (d,  $J = 13.9$  Hz), 115.5 (t,  $J = 225.8$  Hz), 62.7, 55.4, 43.4 (t,  $J = 22.7$  Hz), 13.6.  $^{31}\text{P}$  NMR (162 MHz,  $\text{CDCl}_3$ )  $\delta$  33.3.  $^{19}\text{F}$  NMR (377 MHz,  $\text{CDCl}_3$ )  $\delta$  -98.2. HRMS (ESI)  $m/z$ :  $[\text{M}+\text{H}]^+$  calcd for  $\text{C}_{40}\text{H}_{34}\text{F}_2\text{O}_3\text{P}^+$  631.2208; found 631.2205.

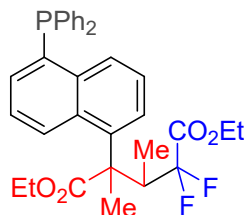

Eiethyl-2-(5-(diphenylphosphanyl)naphthalen-1-yl)-4,4-difluoro-2,3-dimethylpentanedioate (**4m**)

The general procedure was applied to **1a** (31.2 mg, 0.1 mmol, 1equiv), **2m** (38.4 mg, 0.3 mmol, 3.0 equiv), **3a** (60.9 mg, 0.3 mmol, 3.0 equiv),  $[\text{RuCl}_2(p\text{-cymene})]_2$  (3.0 mg, 5.0 mol%), NaOAc (16.4 mg, 2.0 equiv) in  $\text{PhCF}_3$  (1.0 mL) was stirred at 80 °C in heating mantle for 12 h under an atmosphere of argon. At ambient temperature, EtOAc (15 mL) was added, and the mixture was filtered through a short pad of silica gel. The solvent was removed in vacuo and the residue was purified by preparative chromatography ( $R_f = 0.5$ , PE/DCM/EA = 10/1/1) afforded the product **4m** (31 mg, 55 % yield),  $^1\text{H}$  NMR (400 MHz,  $\text{CDCl}_3$ )  $\delta$  8.49 (dd,  $J = 8.4, 5.2$  Hz, 1H), 8.19 (d,  $J = 8.8$  Hz, 1H), 7.56 (d,  $J = 7.2$  Hz, 1H), 7.43 (dd,  $J = 8.3, 7.6$  Hz, 1H), 7.36 - 7.24 (m, 11H), 7.00 - 6.97 (m, 1H), 4.46 - 4.38 (m, 2H), 4.05 - 3.96 (m, 2H), 3.91 - 3.78 (m, 1H), 1.93 (s, 3H), 1.44 (t,  $J = 7.2$  Hz, 3H), 0.92 (t,  $J = 7.2$  Hz, 3H), 0.62 (dd,  $J = 7.2, 2.4$  Hz, 3H).  $^{13}\text{C}$  NMR (101 MHz,  $\text{CDCl}_3$ )  $\delta$  176.8, 164.9 (t,  $J = 33.3$  Hz), 138.6 (d,  $J = 1.0$  Hz), 136.5, 136.4, 136.2, 136.0, 134.5, 134.4, 134.3, 134.2, 131.7, 131.6 (d,  $J = 4.0$  Hz), 129.1, 129.0, 128.8, 128.7, 126.9, 126.6, 125.9, 125.7, 125.5 (d,  $J = 3.0$  Hz), 124.9, 117.7 (dd,  $J = 262.6, 250.5$  Hz), 62.9, 61.4, 52.3, 41.1 (t,  $J = 21.2$  Hz), 20.5, 20.4, 14.2, 13.9, 10.4 (dd,  $J = 8.1, 3.0$  Hz).  $^{31}\text{P}$  NMR (162 MHz,  $\text{CDCl}_3$ )  $\delta$  -12.8.  $^{19}\text{F}$  NMR (377 MHz,  $\text{CDCl}_3$ )  $\delta$  -98.5 (d,  $J = 271.4$  Hz), -108.4 (d,  $J = 267.7$  Hz). HRMS (ESI)  $m/z$ :  $[\text{M}+\text{H}]^+$  calcd for  $\text{C}_{33}\text{H}_{34}\text{F}_2\text{O}_4\text{P}^+$  563.2157; found 563.2150.

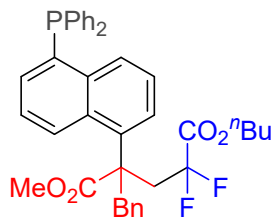

5-butyl-1-methyl-2-benzyl-2-(5-(diphenylphosphanyl)naphthalen-1-yl)-4,4-difluoropentanedioate (**4o**)

The general procedure was applied to **1a** (31.2 mg, 0.1 mmol, 1 equiv), **2a** (52.8 mg, 0.3 mmol, 3.0 equiv), **3b** (69.3 mg, 0.3 mmol, 3.0 equiv),  $[\text{RuCl}_2(p\text{-cymene})]_2$  (3.0 mg, 5.0 mol%), NaOAc (16.4 mg, 2.0 equiv) in  $\text{PhCF}_3$  (1.0 mL) was stirred at 80 °C in heating mantle for 12 h under an atmosphere of argon. At ambient temperature, EtOAc (15 mL) was added, and the mixture was filtered through a short pad of silica gel. The solvent was removed in vacuo and the residue was purified by preparative chromatography ( $R_f = 0.5$ , PE/DCM/EA = 10/1/1) afforded the product **4o** (50 mg, 79 % yield),  $^1\text{H}$  NMR (400 MHz,  $\text{CDCl}_3$ )  $\delta$  8.53 (dd,  $J = 8.4, 5.2$  Hz, 1H), 7.86 (d,  $J = 8.8$  Hz, 1H), 7.61 (d,  $J = 6.8$  Hz, 1H), 7.44 - 7.39 (m, 1H), 7.37 - 7.29 (m, 10H), 7.29 - 7.25 (m, 4H), 7.10 - 7.03 (m, 2H), 7.00 (dd,  $J = 6.8, 4.8$  Hz, 1H), 4.05 (d,  $J = 13.2$  Hz, 1H), 3.58 - 3.44 (m, 5H), 3.29 - 3.08 (m, 2H), 2.98 (q,  $J = 14.8$  Hz, 1H), 1.29 - 1.23 (m, 2H), 1.19 - 1.10 (m, 2H), 0.81 (t,  $J = 7.2$  Hz, 3H).  $^{13}\text{C}$  NMR (101 MHz,  $\text{CDCl}_3$ )  $\delta$  175.7, 162.9 (t,  $J = 32.3$  Hz), 136.5, 136.4, 136.4, 136.3, 136.0, 134.6, 134.4, 134.2, 131.9 (d,  $J = 4$  Hz), 131.7, 130.9, 129.1, 129.0, 128.8, 128.7, 128.4, 127.4, 127.1, 126.1, 125.5 (d,  $J = 2$  Hz), 124.5, 116.2 (dd,  $J = 257.6, 248.5$  Hz), 66.3, 52.5, 52.1 (d,  $J = 5.0$  Hz), 42.3 (d,  $J = 4.0$  Hz), 36.7 (dd,  $J = 25.3, 20.2$  Hz), 30.0, 18.9, 13.7.  $^{31}\text{P}$  NMR (162 MHz,  $\text{CDCl}_3$ )  $\delta$  -12.8.  $^{19}\text{F}$  NMR (377 MHz,  $\text{CDCl}_3$ )  $\delta$  -105.6, -106.3. HRMS (ESI)  $m/z$ :  $[\text{M}+\text{H}]^+$  calcd for  $\text{C}_{39}\text{H}_{38}\text{F}_2\text{O}_4\text{P}^+$  639.2470; found 639.2463.

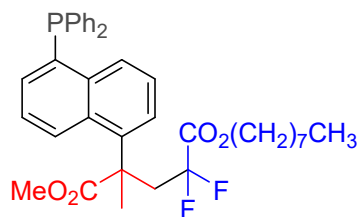

5-heptyl-1-methyl-2-benzyl-2-(5-(diphenylphosphanyl)naphthalen-1-yl)-4,4-difluoropentanedioate (**4p**)

The general procedure was applied to **1a** (31.2 mg, 0.1 mmol, 1 equiv), **2f** (30 mg, 0.3 mmol, 3.0 equiv), **3c** (86.1 mg, 0.3 mmol, 3.0 equiv),  $[\text{RuCl}_2(p\text{-cymene})]_2$  (3.0 mg, 5.0 mol%), NaOAc (16.4 mg, 2.0 equiv) in  $\text{PhCF}_3$  (1.0 mL) was stirred at 80 °C in heating mantle for 12 h under an atmosphere of argon. At ambient temperature, EtOAc (15 mL) was added, and the mixture was filtered through a short pad of silica gel. The solvent was removed in vacuo and the residue was purified by preparative chromatography ( $R_f = 0.5$ , PE/DCM/EA = 10/1/1) afforded the product **4p** (31 mg, 50 % yield),  $^1\text{H}$  NMR (400 MHz,  $\text{CDCl}_3$ )  $\delta$  8.49 (dd,  $J = 8.4, 5.2$  Hz, 1H), 7.74 (d,  $J = 8.8$  Hz, 1H), 7.56 (d,  $J = 7.2$  Hz, 1H), 7.44 - 7.39 (m, 1H), 7.37 - 7.26 (m, 11H), 6.99 (dd,  $J = 6.8, 4.8$  Hz, 1H), 3.60 - 3.48 (m, 4H), 3.37 - 3.23 (m, 1H), 3.18 - 3.05 (m, 2H), 1.97 (s, 3H), 1.28 - 1.14 (m, 10H), 1.10 - 1.01 (m, 2H), 0.87 (t,  $J = 7.2$  Hz, 3H).  $^{13}\text{C}$  NMR (101 MHz,  $\text{CDCl}_3$ )  $\delta$  178.0, 163.1 (t,  $J = 34.3$  Hz), 136.3 (d,  $J = 43.4$  Hz), 136.4 - 136.3 (m), 134.5, 134.4, 134.3, 134.2, 131.7, 131.5 (d,  $J = 5.1$  Hz), 129.1, 129.0, 128.8, 128.7, 127.3, 127.0, 126.1, 125.8, 125.5, 124.5, 115.8 (t,  $J = 255.5$  Hz), 66.6, 53.0, 47.6 (d,  $J = 7.1$  Hz), 41.4 (dd,  $J = 25.3, 21.2$  Hz), 31.9, 29.2, 27.9, 25.6, 25.3 (d,  $J = 4.0$  Hz), 22.8, 14.2.  $^{31}\text{P}$  NMR (162 MHz,  $\text{CDCl}_3$ )  $\delta$  -13.1.  $^{19}\text{F}$  NMR (377 MHz,  $\text{CDCl}_3$ )  $\delta$  -93.4, -93.5, -94.1, -94.2, -103.0, -103.1, -103.7, -103.8. HRMS (ESI)  $m/z$ :  $[\text{M}+\text{H}]^+$  calcd for  $\text{C}_{37}\text{H}_{42}\text{F}_2\text{O}_4\text{P}^+$  619.2783; found 619.2775.

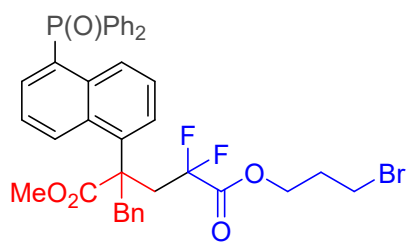

5-(3-bromopropyl)-1-methyl-2-benzyl-2-(5-(diphenylphosphoryl)naphthalen-1-yl)-4,4-difluoropentanedioate (**4q**)

The general procedure was applied to **1a** (31.2 mg, 0.1 mmol, 1 equiv), **2a** (52.8 mg, 0.3 mmol, 3.0 equiv), **3d** (88.5 mg, 0.3 mmol, 3.0 equiv), [RuCl<sub>2</sub>(*p*-cymene)]<sub>2</sub> (3.0 mg, 5.0 mol%), NaOAc (16.4 mg, 2.0 equiv) in PhCF<sub>3</sub> (1.0 mL) was stirred at 80 °C in heating mantle for 12 h under an atmosphere of argon. At ambient temperature, EtOAc (15 mL) was added, and the mixture was filtered through a short pad of silica gel. The solvent was removed in vacuo and the residue was purified by preparative chromatography (*R*<sub>f</sub> = 0.5, PE/DCM/EA = 10/1/1) afforded the product, the product was oxidized by adding 1mL H<sub>2</sub>O<sub>2</sub>, then DCM (10mL) and H<sub>2</sub>O (10mL) were added for liquid separation to remove the water phase, The solvent was removed in vacuo and the residue was purified by preparative chromatography (*R*<sub>f</sub> = 0.5, PE/DCM/EA = 1/1/1) afforded the product **4q** (43 mg, 60 % yield), <sup>1</sup>H NMR (400 MHz, CDCl<sub>3</sub>) δ 8.72 (d, *J* = 8.6 Hz, 1H), 8.06 (d, *J* = 8.6 Hz, 1H), 7.74 - 7.61 (m, 5H), 7.60 - 7.54 (m, 2H), 7.51 - 7.38 (m, 6H), 7.33 - 7.26 (m, 4H), 7.12 - 6.98 (m, 2H), 4.01 (d, *J* = 12.8 Hz, 1H), 3.60 - 3.38 (m, 6H), 3.36 - 3.05 (m, 3H), 2.97 (dd, *J* = 28.4, 15.2 Hz, 1H), 1.90 - 1.76 (m, 2H). <sup>13</sup>C NMR (126 MHz, CDCl<sub>3</sub>) δ 175.5, 162.9 (d, *J* = 32.8 Hz), 136.7, 135.7, 134.8 (d, *J* = 7.6 Hz), 133.4, 133.3, 132.6 (d, *J* = 8.8 Hz), 132.4 (d, *J* = 8.8 Hz), 132.3, 132.2, 131.26, 130.9 (d, *J* = 100.8 Hz), 130.9, 128.9, 128.8, 128.7, 128.5, 128.1 (d, *J* = 1.3 Hz), 127.5, 126.5, 124.9 (d, *J* = 13.9 Hz), 116.1 (dd, *J* = 258.3, 247.0 Hz), 64.3, 52.5, 52.1 (d, *J* = 5.0 Hz), 42.3 (d, *J* = 7.6 Hz), 36.8 (dd, *J* = 25.2, 18.9 Hz), 31.0, 28.7. <sup>31</sup>P NMR (202 MHz, CDCl<sub>3</sub>) δ 32.75. <sup>19</sup>F NMR (471 MHz, CDCl<sub>3</sub>) δ -105.4, -106.0. HRMS (ESI) *m/z*: [M+H]<sup>+</sup> calcd for C<sub>38</sub>H<sub>35</sub>BrF<sub>2</sub>O<sub>5</sub>P<sup>+</sup> 719.1368; found 719.1360.

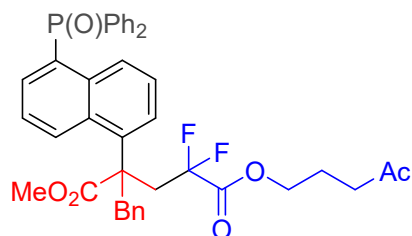

1-methyl-5-(4-oxopentyl)-2-benzyl-2-(5-(diphenylphosphoryl)naphthalen-1-yl)-4,4-difluoropentanedioate (**4r**)

The general procedure was applied to **1a** (31.2 mg, 0.1 mmol, 1 equiv), **2a** (52.8 mg, 0.3 mmol, 3.0 equiv), **3e** (77.7 mg, 0.3 mmol, 3.0 equiv), [RuCl<sub>2</sub>(*p*-cymene)]<sub>2</sub> (3.0 mg, 5.0 mol%), NaOAc (16.4 mg, 2.0 equiv) in PhCF<sub>3</sub> (1.0 mL) was stirred at 80 °C in heating mantle for 12 h under an atmosphere of argon. At ambient temperature, EtOAc (15 mL) was added, and the mixture was filtered through a short pad of



silica gel. The solvent was removed in vacuo and the residue was purified by preparative chromatography ( $R_f = 0.5$ , PE/DCM/EA = 8/1/1) afforded the product, the product was oxidized by adding 1mL  $H_2O_2$ , then DCM (10mL) and  $H_2O$  (10mL) were added for liquid separation to remove the water phase, The solvent was removed in vacuo and the residue was purified by preparative chromatography ( $R_f = 0.5$ , PE/DCM/EA = 1/1/1) afforded the product **4r** (53 mg, 78 % yield),  $^1H$  NMR (400 MHz,  $CDCl_3$ )  $\delta$  8.70 (d,  $J = 8.6$  Hz, 1H), 8.06 (d,  $J = 8.6$  Hz, 1H), 7.73 - 7.55 (m, 7H), 7.51 - 7.37 (m, 6H), 7.32 - 7.26 (m, 4H), 7.13 - 6.93 (m, 2H), 4.01 (d,  $J = 12.8$  Hz, 1H), 3.61 - 3.39 (m, 5H), 3.37 - 3.08 (m, 2H), 2.96 (dd,  $J = 28.4, 15.6$  Hz, 1H), 2.32 (t,  $J = 7.2$  Hz, 2H), 2.10 (s, 3H), 1.62 - 1.55 (m, 2H).  $^{13}C$  NMR (126 MHz,  $CDCl_3$ )  $\delta$  207.2, 175.5, 163.0 (dd,  $J = 30.2, 30.4$  Hz), 136.6, 135.8, 134.8 (d,  $J = 7.6$  Hz), 133.4, 133.3, 133.2, 132.6 (d,  $J = 8.6$  Hz), 132.4 (d,  $J = 12.6$  Hz), 132.3, 132.2, 132.1, 130.9, 130.8 (d,  $J = 100.8$  Hz), 128.9, 128.8, 128.7 (d,  $J = 6.3$  Hz), 128.5, 128.1, 127.5, 126.5, 124.9 (d,  $J = 13.9$  Hz), 116.1 (dd,  $J = 247.0, 257.0$  Hz), 65.7, 52.2, 52.1 (d,  $J = 5.0$  Hz), 42.2 (d,  $J = 2.5$  Hz) 36.8 (dd,  $J = 25.2, 20.2$  Hz), 30.1, 22.0.  $^{31}P$  NMR (202 MHz,  $CDCl_3$ )  $\delta$  32.8.  $^{19}F$  NMR (471 MHz,  $CDCl_3$ )  $\delta$  -105.1, -105.7. HRMS (ESI)  $m/z$ :  $[M+H]^+$  calcd for  $C_{40}H_{38}F_2O_6P^+$  683.2369; found 683.2357.

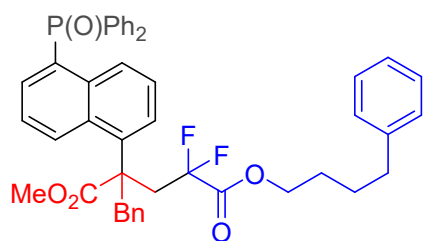

1-methyl-5-(4-phenylbutyl)-2-benzyl-2-(5-(diphenylphosphoryl)naphthalen-1-yl)-4,4-difluoropentanedioate (**4s**)

The general procedure was applied to **1a** (31.2 mg, 0.1 mmol, 1 equiv), **2a** (52.8 mg, 0.3 mmol, 3.0 equiv), **3f** (92.1 mg, 0.3 mmol, 3.0 equiv),  $[RuCl_2(p\text{-cymene})]_2$  (3.0 mg, 5.0 mol%), NaOAc (16.4 mg, 2.0 equiv) in  $PhCF_3$  (1.0 mL) was stirred at 80 °C in heating mantle for 12 h under an atmosphere of argon. At ambient temperature, EtOAc (15 mL) was added, and the mixture was filtered through a short pad of silica gel. The solvent was removed in vacuo and the residue was purified by preparative chromatography ( $R_f = 0.5$ , PE/DCM/EA = 10/1/1) afforded the product, the product was oxidized by adding 1mL  $H_2O_2$ , then DCM (10mL) and  $H_2O$  (10mL) were added for liquid separation to remove the water phase, The solvent was removed in vacuo and the residue was purified by preparative chromatography ( $R_f = 0.5$ , PE/DCM/EA = 1/1/1) afforded the product **4s** (65 mg, 89 % yield),  $^1H$  NMR (400 MHz,  $CDCl_3$ )  $\delta$  8.69 (d,  $J = 8.4$  Hz, 1H), 8.05 (d,  $J = 8.4$  Hz, 1H), 7.70 - 7.65 (m, 4H), 7.61 - 7.40 (m, 7H), 7.38 - 7.23 (m, 8H), 7.21 - 7.15 (m, 1H), 7.11 - 6.99 (m, 4H), 4.00 (d,  $J = 13.2$  Hz, 1H), 3.63 - 3.42 (m, 5H), 3.37 - 3.09 (m, 2H), 2.96 (dd,  $J = 28.4, 15.6$  Hz, 1H), 2.53 (t,  $J = 7.2$  Hz, 2H), 1.50 - 1.42 (m, 2H), 1.41 - 1.31 (m, 2H).  $^{13}C$  NMR (126 MHz,  $CDCl_3$ )  $\delta$  175.5, 163.0 (d,  $J = 32.8$  Hz), 141.7, 136.6, 135.7, 134.7 (d,  $J = 7.6$  Hz), 133.3 (d,  $J = 3.8$  Hz), 133.2, 132.5 (d,  $J = 8.8$  Hz), 132.4 (d,  $J = 17.6$  Hz), 132.2, 132.1, 132.0, 130.8,



130.6 (d,  $J = 100.8$  Hz), 128.8, 128.7, 128.6 (d,  $J = 6.3$  Hz), 128.5, 128.4, 128.1 (d,  $J = 2.5$  Hz), 127.4, 126.4, 126.0, 124.7 (d,  $J = 15.1$  Hz), 116.1 (dd,  $J = 258.3, 248.2$  Hz), 66.5, 52.4, 52.1 (d,  $J = 5.0$  Hz), 42.2 (d,  $J = 2.5$  Hz), 36.7 (t,  $J = 22.7$  Hz), 35.3, 27.4, 27.2.  $^{31}\text{P}$  NMR (202 MHz,  $\text{CDCl}_3$ )  $\delta$  32.7.  $^{19}\text{F}$  NMR (471 MHz,  $\text{CDCl}_3$ )  $\delta$  -105.3, -105.9. HRMS (ESI)  $m/z$ :  $[\text{M}+\text{H}]^+$  calcd for  $\text{C}_{45}\text{H}_{42}\text{F}_2\text{O}_5\text{P}^+$  731.2732 found 731.2719.

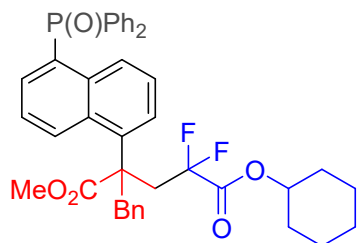

5-cyclohexyl-1-methyl-2-benzyl-2-(5-(diphenylphosphoryl)naphthalen-1-yl)-4,4-difluoropentanedioate (**4t**)

The general procedure was applied to **1a** (31.2 mg, 0.1 mmol, 1 equiv), **2a** (52.8 mg, 0.3 mmol, 3.0 equiv), **3g** (77.1 mg, 0.3 mmol, 3.0 equiv),  $[\text{RuCl}_2(p\text{-cymene})]_2$  (3.0 mg, 5.0 mol%), NaOAc (16.4 mg, 2.0 equiv) in  $\text{PhCF}_3$  (1.0 mL) was stirred at 80 °C in heating mantle for 12 h under an atmosphere of argon. At ambient temperature, EtOAc (15 mL) was added, and the mixture was filtered through a short pad of silica gel. The solvent was removed in vacuo and the residue was purified by preparative chromatography ( $R_f = 0.5$ , PE/DCM/EA = 10/1/1) afforded the product, the product was oxidized by adding 1mL  $\text{H}_2\text{O}_2$ , then DCM (10mL) and  $\text{H}_2\text{O}$  (10mL) were added for liquid separation to remove the water phase, The solvent was removed in vacuo and the residue was purified by preparative chromatography ( $R_f = 0.5$ , PE/DCM/EA = 1/1/1) afforded the product **4t** (59 mg, 88 % yield),  $^1\text{H}$  NMR (400 MHz,  $\text{CDCl}_3$ )  $\delta$  8.69 (d,  $J = 8.8$  Hz, 1H), 8.11 (d,  $J = 8.8$  Hz, 1H), 7.72 - 7.64 (m, 4H), 7.59 - 7.44 (m, 7H), 7.41 - 7.36 (m, 2H), 7.30 - 7.22 (m, 4H), 7.08 - 6.82 (m, 2H), 4.54 - 4.29 (m, 1H), 4.00 (d,  $J = 13.2$  Hz, 1H), 3.62 (d,  $J = 13.2$  Hz, 1H), 3.57 (s, 3H), 3.17 - 2.87 (m, 2H), 1.72 - 1.26 (m, 10H).  $^{13}\text{C}$  NMR (126 MHz,  $\text{CDCl}_3$ )  $\delta$  175.7, 162.9 (d,  $J = 31.5$  Hz), 137.1, 135.9, 134.9 (d,  $J = 7.6$  Hz), 133.4 (d,  $J = 16.4$  Hz), 133.2 (d,  $J = 11.3$  Hz), 132.5 (d,  $J = 21.4$  Hz), 132.4 (d,  $J = 13.9$  Hz), 132.3, 132.2, 132.1, 132.0, 130.8, 130.6 (d,  $J = 102.1$  Hz), 128.8, 128.7, 128.4 (d,  $J = 6.3$  Hz), 128.2, 128.1 (d,  $J = 1.3$  Hz), 127.3, 126.4, 126.0, 124.7 (d,  $J = 13.9$  Hz), 116.1 (dd,  $J = 257.0, 250.7$  Hz), 75.9, 52.5, 52.1, 42.1, 36.9 (t,  $J = 21.4$  Hz), 30.9, 30.8, 25.2, 23.2.  $^{31}\text{P}$  NMR (202 MHz,  $\text{CDCl}_3$ )  $\delta$  32.9.  $^{19}\text{F}$  NMR (471 MHz,  $\text{CDCl}_3$ )  $\delta$  -104.2, -104.8. HRMS (ESI)  $m/z$ :  $[\text{M}+\text{H}]^+$  calcd for  $\text{C}_{41}\text{H}_{40}\text{F}_2\text{O}_5\text{P}^+$  681.2576; found 681.2567.

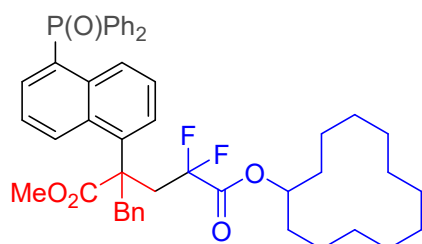

5-cyclododecyl-1-methyl-2-benzyl-2-(5-(diphenylphosphoryl)naphthalen-1-yl)-4,4-difluoropentanedioate (**4u**)

The general procedure was applied to **1a** (31.2 mg, 0.1 mmol, 1 equiv), **2a** (52.8 mg, 0.3 mmol, 3.0 equiv), **3h** (102.3 mg, 0.3 mmol, 3.0 equiv), [RuCl<sub>2</sub>(*p*-cymene)]<sub>2</sub> (3.0 mg, 5.0 mol%), NaOAc (16.4 mg, 2.0 equiv) in PhCF<sub>3</sub> (1.0 mL) was stirred at 80 °C in heating mantle for 12 h under an atmosphere of argon. At ambient temperature, EtOAc (15 mL) was added, and the mixture was filtered through a short pad of silica gel. The solvent was removed in vacuo and the residue was purified by preparative chromatography (R<sub>f</sub> = 0.5, PE/DCM/EA = 10/1/1) afforded the product, the product was oxidized by adding 1mL H<sub>2</sub>O<sub>2</sub>, then DCM (10mL) and H<sub>2</sub>O (10mL) were added for liquid separation to remove the water phase, The solvent was removed in vacuo and the residue was purified by preparative chromatography (R<sub>f</sub> = 0.5, PE/DCM/EA = 1/1/1) afforded the product **4u** (63 mg, 82 % yield), <sup>1</sup>H NMR (400 MHz, CDCl<sub>3</sub>) δ 8.70 (d, *J* = 8.6 Hz, 1H), 8.11 (d, *J* = 8.6 Hz, 1H), 7.68 (dd, *J* = 10.4, 8.6 Hz, 4H), 7.60 - 7.35 (m, 9H), 7.32 - 7.19 (m, 4H), 7.01 - 6.79 (m, 2H), 4.86 - 4.61 (m, 1H), 3.98 (d, *J* = 13.2 Hz, 1H), 3.65 (d, *J* = 12.8 Hz, 1H), 3.57 (s, 3H), 3.12 - 2.84 (m, 2H), 1.73 - 1.55 (m, 2H), 1.46 - 1.22 (m, 20H). <sup>13</sup>C NMR (101 MHz, CDCl<sub>3</sub>) δ 175.8, 163.2 (t, *J* = 32.3 Hz), 137.2, 135.9, 134.9 (d, *J* = 9.1 Hz), 134.8, 133.4 (d, *J* = 6.1 Hz), 133.3 (d, *J* = 9.1 Hz), 132.4, 132.3, 132.2, 132.1, 132.0, 130.8, 130.5 (d, *J* = 102.0 Hz), 128.8, 128.7, 128.4 (d, *J* = 8.1 Hz), 128.2, 128.1 (d, *J* = 2.0 Hz), 127.2, 126.4, 125.9, 124.8 (d, *J* = 15.2 Hz), 116.1 (t, *J* = 256.5 Hz), 76.5, 52.6, 52.1, 42.1, 36.8 (t, *J* = 20.2 Hz), 28.2, 24.4, 23.1, 23.0, 22.9, 22.8, 20.2. <sup>31</sup>P NMR (162 MHz, CDCl<sub>3</sub>) δ 33.1. <sup>19</sup>F NMR (377 MHz, CDCl<sub>3</sub>) δ -103.9, -104.6. HRMS (ESI) *m/z*: [M+H]<sup>+</sup> calcd for C<sub>47</sub>H<sub>52</sub>F<sub>2</sub>O<sub>5</sub>P<sup>+</sup> 765.3515; found 765.3506.

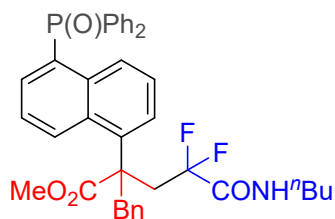

Methyl-2-benzyl-5-(butylamino)-2-(5-(diphenylphosphoryl)naphthalen-1-yl)-4,4-difluoro-5-oxopentanoate (**4v**)

The general procedure was applied to **1a** (31.2 mg, 0.1 mmol, 1 equiv), **2a** (52.8 mg, 0.3 mmol, 3.0 equiv), **3i** (69.0 mg, 0.3 mmol, 3.0 equiv), [RuCl<sub>2</sub>(*p*-cymene)]<sub>2</sub> (3.0 mg, 5.0 mol%), NaOAc (16.4 mg, 2.0 equiv) in PhCF<sub>3</sub> (1.0 mL) was stirred at 80 °C in heating mantle for 12 h under an atmosphere of argon. At ambient temperature, EtOAc (15 mL) was added, and the mixture was filtered through a short pad of silica gel. The solvent was removed in vacuo and the residue was purified by preparative chromatography (R<sub>f</sub> = 0.5, PE/DCM/EA = 8/1/1) afforded the product, the product was oxidized by adding 1mL H<sub>2</sub>O<sub>2</sub>, then DCM (10mL) and H<sub>2</sub>O (10mL) were added for liquid separation to remove the water phase, The solvent was removed in vacuo and the residue was purified by preparative chromatography (R<sub>f</sub> = 0.5, PE/DCM/EA = 1/1/1) afforded the product **4v** (39 mg, 60 % yield), <sup>1</sup>H NMR (400 MHz, CDCl<sub>3</sub>) δ 8.70

(d,  $J = 8.6$  Hz, 1H), 8.09 (d,  $J = 8.6$  Hz, 1H), 7.73 - 7.60 (m, 4H), 7.59 - 7.54 (m, 2H), 7.49 - 7.45 (m, 5H), 7.40 - 7.33 (m, 2H), 7.28 - 7.19 (m, 4H), 7.00 - 6.80 (m, 2H), 6.02 (s, 1H), 3.91 (d,  $J = 12.8$  Hz, 1H), 3.64 - 3.47 (m, 4H), 3.18 (dd,  $J = 35.0, 17.8$  Hz, 1H), 3.06 - 2.89 (m, 2H), 2.85 - 2.69 (m, 1H), 1.40 - 1.28 (m, 2H), 1.26 - 1.17 (m, 2H), 0.86 (t,  $J = 7.2$  Hz, 3H).  $^{13}\text{C}$  NMR (101 MHz,  $\text{CDCl}_3$ )  $\delta$  175.8, 163.3 (t,  $J = 28.3$  Hz), 137.4, 135.8, 134.8 (d,  $J = 8.1$  Hz), 133.5, 133.3, 132.5, 132.5 (d,  $J = 9.1$  Hz), 132.2, 132.1, 130.8, 129.8, 128.8, 128.7, 128.4, 128.3, 127.3, 126.2, 125.8, 124.7 (d,  $J = 14.1$  Hz), 118.0 (t,  $J = 257.6$  Hz), 52.5, 52.0, 42.2, 39.2, 36.3 (t,  $J = 21.2$  Hz), 31.0, 19.9, 13.8.  $^{31}\text{P}$  NMR (162 MHz,  $\text{CDCl}_3$ )  $\delta$  33.3.  $^{19}\text{F}$  NMR (377 MHz,  $\text{CDCl}_3$ )  $\delta$  -104.8, -105.4. HRMS (ESI)  $m/z$ :  $[\text{M}+\text{H}]^+$  calcd for  $\text{C}_{39}\text{H}_{39}\text{F}_2\text{NO}_4\text{P}^+$  654.2579; found 654.2576.

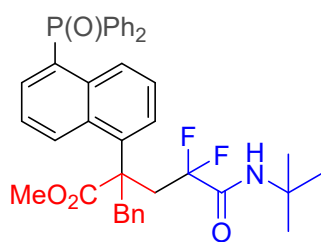

Methyl-2-benzyl-5-(tert-butylamino)-2-(5-(diphenylphosphoryl)naphthalen-1-yl)-4,4-difluoro-5-oxopentanoate (**4w**)

The general procedure was applied to **1a** (31.2 mg, 0.1 mmol, 1 equiv), **2a** (52.8 mg, 0.3 mmol, 3.0 equiv), **3j** (69.0 mg, 0.3 mmol, 3.0 equiv),  $[\text{RuCl}_2(p\text{-cymene})]_2$  (3.0 mg, 5.0 mol%), NaOAc (16.4 mg, 2.0 equiv) in  $\text{PhCF}_3$  (1.0 mL) was stirred at 80 °C in heating mantle for 12 h under an atmosphere of argon. At ambient temperature, EtOAc (15 mL) was added, and the mixture was filtered through a short pad of silica gel. The solvent was removed in vacuo and the residue was purified by preparative chromatography ( $R_f = 0.5$ , PE/DCM/EA = 8/1/1) afforded the product, the product was oxidized by adding 1 mL  $\text{H}_2\text{O}_2$ , then DCM (10 mL) and  $\text{H}_2\text{O}$  (10 mL) were added for liquid separation to remove the water phase, The solvent was removed in vacuo and the residue was purified by preparative chromatography ( $R_f = 0.5$ , PE/DCM/EA = 1/1/1) afforded the product **4w** (38 mg, 58 % yield),  $^1\text{H}$  NMR (400 MHz,  $\text{CDCl}_3$ )  $\delta$  8.69 (d,  $J = 8.6$  Hz, 1H), 8.11 (d,  $J = 8.6$  Hz, 1H), 7.72 - 7.64 (m, 4H), 7.60 - 7.54 (m, 2H), 7.50 - 7.43 (m, 5H), 7.41 - 7.36 (m, 2H), 7.29 - 7.23 (m, 1H), 7.20 - 7.19 (m, 3H), 6.99 - 6.80 (m, 2H), 5.86 (s, 1H), 3.91 (d,  $J = 13.2$  Hz, 1H), 3.62 (d,  $J = 13.2$  Hz, 1H), 3.57 (s, 3H), 3.17 - 2.93 (m, 2H), 1.25 (s, 9H).  $^{13}\text{C}$  NMR (101 MHz,  $\text{CDCl}_3$ )  $\delta$  176.0, 162.7 (t,  $J = 27.3$  Hz), 137.8, 135.9, 134.9 (d,  $J = 8.1$  Hz), 133.4 (d,  $J = 2.0$  Hz), 133.3 (d,  $J = 2.0$  Hz), 132.5, 132.4, 132.3, 132.2, 132.1, 130.8, 130.5 (d,  $J = 102.0$  Hz), 128.8, 128.7, 128.3 (d,  $J = 3.0$  Hz), 128.2, 127.2, 126.3, 125.9, 124.6 (d,  $J = 15.2$  Hz), 117.8 (d,  $J = 257.6$  Hz), 52.0, 51.9, 42.1, 36.4 (d,  $J = 17.2$  Hz), 28.4.  $^{31}\text{P}$  NMR (162 MHz,  $\text{CDCl}_3$ )  $\delta$  33.3.  $^{19}\text{F}$  NMR (377 MHz,  $\text{CDCl}_3$ )  $\delta$  -99.7 (d,  $J = 256.4$  Hz), -102.15 (d,  $J = 256.4$  Hz). HRMS (ESI)  $m/z$ :  $[\text{M}+\text{H}]^+$  calcd for  $\text{C}_{39}\text{H}_{39}\text{F}_2\text{NO}_4\text{P}^+$  654.2579; found 654.2569.

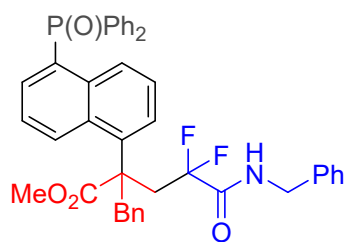

Methyl-2-benzyl-5-(benzylamino)-2-(5-(diphenylphosphoryl)naphthalen-1-yl)-4,4-difluoro-5-oxopentanoate (**4x**)

The general procedure was applied to **1a** (31.2 mg, 0.1 mmol, 1 equiv), **2a** (52.8 mg, 0.3 mmol, 3.0 equiv), **3k** (79.2 mg, 0.3 mmol, 3.0 equiv), [RuCl<sub>2</sub>(*p*-cymene)]<sub>2</sub> (3.0 mg, 5.0 mol%), NaOAc (16.4 mg, 2.0 equiv) in PhCF<sub>3</sub> (1.0 mL) was stirred at 80 °C in heating mantle for 12 h under an atmosphere of argon. At ambient temperature, EtOAc (15 mL) was added, and the mixture was filtered through a short pad of silica gel. The solvent was removed in vacuo and the residue was purified by preparative chromatography (*R<sub>f</sub>* = 0.5, PE/DCM/EA = 8/1/1) afforded the product, the product was oxidized by adding 1mL H<sub>2</sub>O<sub>2</sub>, then DCM (10mL) and H<sub>2</sub>O (10mL) were added for liquid separation to remove the water phase, The solvent was removed in vacuo and the residue was purified by preparative chromatography (*R<sub>f</sub>* = 0.5, PE/DCM/EA = 1/1/1) afforded the product **4x** (35 mg, 51 % yield), <sup>1</sup>H NMR (400 MHz, CDCl<sub>3</sub>) δ 8.74 (d, *J* = 8.6 Hz, 1H), 8.09 (d, *J* = 8.6 Hz, 1H), 7.72 - 7.65 (m, 4H), 7.59 - 7.55 (m, 1H), 7.51 - 7.32 (m, 8H), 7.30 - 7.24 (m, 7H), 7.11 - 7.05 (m, 2H), 7.03 - 6.92 (m, 2H), 6.22 (s, 1H), 4.10 (dd, *J* = 14.5, 6.4 Hz, 1H), 3.90 (d, *J* = 12.8 Hz, 1H), 3.78 - 3.63 (m, 1H), 3.57 (d, *J* = 15.3 Hz, 4H), 3.27 (dd, *J* = 35.2, 17.6 Hz, 1H), 3.00 (dd, *J* = 32.0, 15.8 Hz, 1H). <sup>13</sup>C NMR (101 MHz, CDCl<sub>3</sub>) δ 175.7, 163.2 (t, *J* = 27.3 Hz), 137.2, 136.5, 135.7, 134.8 (d, *J* = 8.1 Hz), 133.5 (d, *J* = 12.1 Hz), 133.3, 132.7 (d, *J* = 8.1 Hz), 132.2, 132.1, 130.8, 130.4 (d, *J* = 102.0 Hz), 128.9, 128.8, 128.7, 128.6 (d, *J* = 6.1 Hz), 128.4 (d, *J* = 3.0 Hz), 128.4, 128.0, 127.4, 126.2, 125.9, 124.8 (d, *J* = 14.1 Hz), 118.0 (t, *J* = 259.6 Hz), 52.5, 52.0 (d, *J* = 2.0 Hz), 43.5, 42.3, 36.1 (t, *J* = 22.2 Hz). <sup>31</sup>P NMR (162 MHz, CDCl<sub>3</sub>) δ 33.2. <sup>19</sup>F NMR (377 MHz, CDCl<sub>3</sub>) δ -105.6, -106.4. HRMS (ESI) *m/z*: [M+H]<sup>+</sup> calcd for C<sub>42</sub>H<sub>37</sub>F<sub>2</sub>NO<sub>4</sub>P<sup>+</sup> 688.2423; found 688.2418.

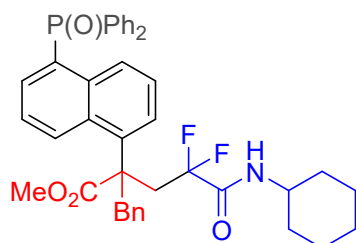

Methyl-2-benzyl-5-(cyclohexylamino)-2-(5-(diphenylphosphoryl)naphthalen-1-yl)-4,4-difluoro-5-oxopentanoate (**4y**)

The general procedure was applied to **1a** (31.2 mg, 0.1 mmol, 1 equiv), **2a** (52.8 mg, 0.3 mmol, 3.0 equiv), **3l** (76.8 mg, 0.3 mmol, 3.0 equiv), [RuCl<sub>2</sub>(*p*-cymene)]<sub>2</sub> (3.0 mg, 5.0 mol%), NaOAc (16.4 mg, 2.0 equiv) in PhCF<sub>3</sub> (1.0 mL) was stirred at 80 °C in heating mantle for 12 h under an atmosphere of argon. At

ambient temperature, EtOAc (15 mL) was added, and the mixture was filtered through a short pad of silica gel. The solvent was removed in vacuo and the residue was purified by preparative chromatography ( $R_f = 0.5$ , PE/DCM/EA = 8/1/1) afforded the product, the product was oxidized by adding 1 mL  $H_2O_2$ , then DCM (10 mL) and  $H_2O$  (10 mL) were added for liquid separation to remove the water phase, The solvent was removed in vacuo and the residue was purified by preparative chromatography ( $R_f = 0.5$ , PE/DCM/EA = 1/1/1) afforded the product **4y** (33 mg, 48 % yield),  **$^1H$  NMR** (400 MHz,  $CDCl_3$ )  $\delta$  8.70 (d,  $J = 8.6$  Hz, 1H), 8.10 (d,  $J = 8.6$  Hz, 1H), 7.71 - 7.55 (m, 6H), 7.51 - 7.33 (m, 7H), 7.28 - 7.19 (m, 4H), 6.98 - 6.77 (m, 2H), 5.91 (s, 1H), 3.90 (d,  $J = 13.2$  Hz, 1H), 3.66 - 3.44 (m, 5H), 3.18 - 2.94 (m, 2H), 1.85 - 1.57 (m, 6H), 1.39 - 0.98 (m, 6H).  **$^{13}C$  NMR** (126 MHz,  $CDCl_3$ )  $\delta$  175.9, 162.6 (t,  $J = 29.0$  Hz), 137.5, 135.7, 134.8 (d,  $J = 7.6$  Hz), 133.3, 133.2, 132.5, 132.4, 132.3, 132.2, 132.1, 132.0, 130.7, 130.4 (d,  $J = 102.1$  Hz), 128.7, 128.6, 128.3, 128.2, 128.1, 127.1, 126.2, 125.7, 124.5 (d,  $J = 15.1$  Hz), 117.80 (t,  $J = 255.8$  Hz), 52.4, 51.9, 48.6, 42.0, 36.7 - 36.4 (m), 32.4, 25.3, 24.5.  **$^{31}P$  NMR** (162 MHz,  $CDCl_3$ )  $\delta$  33.4.  **$^{19}F$  NMR** (377 MHz,  $CDCl_3$ )  $\delta$  -100.2 (d,  $J = 256.4$  Hz), -103.1 (d,  $J = 256.4$  Hz). **HRMS** (ESI)  $m/z$ :  $[M+H]^+$  calcd for  $C_{41}H_{41}F_2NO_4P^+$  680.2736; found 680.2724.

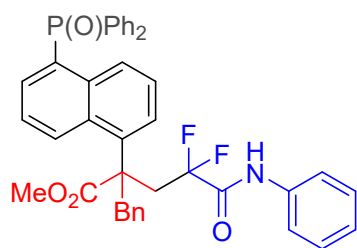

Methyl-2-benzyl-2-(5-(diphenylphosphoryl)naphthalen-1-yl)-4,4-difluoro-5-oxo-5-(phenylamino)pentanoate (**4z**)

The general procedure was applied to **1a** (31.2 mg, 0.1 mmol, 1 equiv), **2a** (52.8 mg, 0.3 mmol, 3.0 equiv), **3m** (75.0 mg, 0.3 mmol, 3.0 equiv),  $[RuCl_2(p\text{-cymene})]_2$  (3.0 mg, 5.0 mol%), NaOAc (16.4 mg, 2.0 equiv) in  $PhCF_3$  (1.0 mL) was stirred at 80 °C in heating mantle for 12 h under an atmosphere of argon. At ambient temperature, EtOAc (15 mL) was added, and the mixture was filtered through a short pad of silica gel. The solvent was removed in vacuo and the residue was purified by preparative chromatography ( $R_f = 0.5$ , PE/DCM/EA = 8/1/1) afforded the product, the product was oxidized by adding 1 mL  $H_2O_2$ , then DCM (10 mL) and  $H_2O$  (10 mL) were added for liquid separation to remove the water phase, The solvent was removed in vacuo and the residue was purified by preparative chromatography ( $R_f = 0.5$ , PE/DCM/EA = 1/1/1) afforded the product **4z** (42 mg, 63 % yield),  **$^1H$  NMR** (400 MHz,  $CDCl_3$ )  $\delta$  8.65 (d,  $J = 8.6$  Hz, 1H), 8.10 (d,  $J = 8.6$  Hz, 1H), 7.97 (s, 1H), 7.71 - 7.62 (m, 4H), 7.58 - 7.54 (m, 2H), 7.49 - 7.35 (m, 8H), 7.28 - 7.20 (m, 7H), 7.15 - 7.12 (m, 1H), 6.98 - 6.85 (m, 2H), 3.90 (d,  $J = 13.2$  Hz, 1H), 3.61 (d,  $J = 13.2$  Hz, 1H), 3.54 (s, 3H), 3.25 - 3.07 (m, 2H).  **$^{13}C$  NMR** (101 MHz,  $CDCl_3$ )  $\delta$  175.9, 161.4 (t,  $J = 28.3$  Hz), 137.4, 135.9, 135.7, 134.9 (d,  $J = 25.3$  Hz), 133.4 (d,  $J = 4.0$  Hz), 133.3 (d,  $J = 5.1$  Hz), 132.4 (d,  $J = 6.1$  Hz), 132.3, 132.2, 132.1, 130.8, 130.5 (d,  $J = 102.0$  Hz), 129.2, 128.8, 128.7, 128.4 (d,

$J = 8.1$  Hz), 128.3, 128.2 (d,  $J = 3.0$  Hz), 127.3, 126.3, 125.9, 125.6, 124.7 (d,  $J = 15.2$  Hz), 120.4, 116.4 (t,  $J = 40.4$  Hz), 52.6, 52.0, 42.2, 36.6 (t,  $J = 23.2$  Hz).  $^{31}\text{P}$  NMR (162 MHz,  $\text{CDCl}_3$ )  $\delta$  33.3.  $^{19}\text{F}$  NMR (377 MHz,  $\text{CDCl}_3$ )  $\delta$  -99.6 (d,  $J = 260.1$  Hz), -101.1 (d,  $J = 260.1$  Hz). HRMS (ESI)  $m/z$ :  $[\text{M}+\text{H}]^+$  calcd for  $\text{C}_{41}\text{H}_{35}\text{F}_2\text{NO}_4\text{P}^+$  674.2266; found 674.2263.

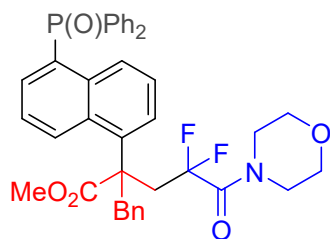

Methyl-2-benzyl-2-(5-(diphenylphosphoryl)naphthalen-1-yl)-4,4-difluoro-5-morpholino-5-oxopentanoate (**4ab**)

The general procedure was applied to **1a** (31.2 mg, 0.1 mmol, 1 equiv), **2a** (52.8 mg, 0.3 mmol, 3.0 equiv), **3n** (73.2 mg, 0.3 mmol, 3.0 equiv),  $[\text{RuCl}_2(p\text{-cymene})]_2$  (3.0 mg, 5.0 mol%), NaOAc (16.4 mg, 2.0 equiv) in  $\text{PhCF}_3$  (1.0 mL) was stirred at 80 °C in heating mantle for 12 h under an atmosphere of argon. At ambient temperature, EtOAc (15 mL) was added, and the mixture was filtered through a short pad of silica gel. The solvent was removed in vacuo and the residue was purified by preparative chromatography ( $R_f = 0.5$ , PE/DCM/EA = 8/1/1) afforded the product, the product was oxidized by adding 1mL  $\text{H}_2\text{O}_2$ , then DCM (10mL) and  $\text{H}_2\text{O}$  (10mL) were added for liquid separation to remove the water phase, The solvent was removed in vacuo and the residue was purified by preparative chromatography ( $R_f = 0.5$ , PE/DCM/EA = 1/1/1) afforded the product **4ab** (31 mg, 46 % yield),  $^1\text{H}$  NMR (400 MHz,  $\text{CDCl}_3$ )  $\delta$  8.68 (d,  $J = 8.6$  Hz, 1H), 8.15 (d,  $J = 8.6$  Hz, 1H), 7.72 - 7.66 (m, 4H), 7.59 - 7.55 (m, 2H), 7.52 - 7.44 (m, 5H), 7.41 - 7.35 (m, 2H), 7.29 - 7.24 (m, 1H), 7.20 - 7.16 (m, 3H), 6.86 - 6.72 (m, 2H), 3.92 (d,  $J = 13.2$  Hz, 1H), 3.69 (d,  $J = 13.2$  Hz, 1H), 3.63 - 3.36 (m, 11H), 3.18 - 3.07 (m, 2H).  $^{13}\text{C}$  NMR (101 MHz,  $\text{CDCl}_3$ )  $\delta$  176.2, 161.7 (t,  $J = 29.3$  Hz), 137.9, 136.0, 134.9 (d,  $J = 8.1$  Hz), 133.4, 133.3, 133.2, 132.4, 132.3, 132.2, 132.1, 130.7, 130.6 (d,  $J = 102.0$  Hz), 128.8, 128.7, 128.2, 127.2, 126.5, 126.2, 124.6 (d,  $J = 15.2$  Hz), 119.3, 66.7, 52.5, 52.1, 46.6 (t,  $J = 6.1$  Hz), 43.5, 42.1.  $^{31}\text{P}$  NMR (162 MHz,  $\text{CDCl}_3$ )  $\delta$  32.2.  $^{19}\text{F}$  NMR (377 MHz,  $\text{CDCl}_3$ )  $\delta$  -96.4. HRMS (ESI)  $m/z$ :  $[\text{M}+\text{H}]^+$  calcd for  $\text{C}_{39}\text{H}_{37}\text{F}_2\text{NO}_5\text{P}^+$  668.2372; found 668.2369.

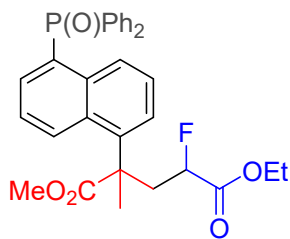

5-ethyl-1-methyl-2-(5-(diphenylphosphanylnaphthalen-1-yl)-4-fluoro-2-methylpentanedioate (**4ac**)

The general procedure was applied to **1a** (31.2 mg, 0.1 mmol, 1 equiv), **2a** (52.8 mg, 0.3 mmol, 3.0 equiv), **3o** (55.2 mg, 0.3 mmol, 3.0 equiv),  $[\text{RuCl}_2(p\text{-cymene})]_2$  (3.0 mg, 5.0 mol%), NaOAc (16.4 mg, 2.0 equiv)

in PhCF<sub>3</sub> (1.0 mL) was stirred at 80 °C in heating mantle for 12 h under an atmosphere of argon. At ambient temperature, EtOAc (15 mL) was added, and the mixture was filtered through a short pad of silica gel. The solvent was removed in vacuo and the residue was purified by preparative chromatography ( $R_f$  = 0.5, PE/DCM/EA = 10/1/1) afforded the product, the product was oxidized by adding 1mL H<sub>2</sub>O<sub>2</sub>, then DCM (10mL) and H<sub>2</sub>O (10mL) were added for liquid separation to remove the water phase, The solvent was removed in vacuo and the residue was purified by preparative chromatography ( $R_f$  = 0.5, PE/DCM/EA = 1/1/1) afforded the product **4ac** (dr = 1 : 0.75) (32 mg, 60 % yield), **<sup>1</sup>H NMR** (400 MHz, CDCl<sub>3</sub>)  $\delta$  8.61 - 8.36 (m, 1.74H), 7.78 (dd,  $J$  = 8.6, 6.2 Hz, 1.74H), 7.58 (dd,  $J$  = 19.8, 7.2 Hz, 1.75H), 7.47 - 7.40 (m, 1.75H), 7.37 - 7.27 (m, 19.26H), 7.02 - 6.95 (m, 1.76H), 5.17 (ddd,  $J$  = 49.2, 8.2, 2.0 Hz, 0.75H), 4.32 (ddd,  $J$  = 49.8, 10.0, 1.6 Hz, 1H), 4.18 - 4.00 (m, 3.52H), 3.61 (s, 3H), 3.60 (s, 2.17H), 3.12 - 2.93 (m, 1.74H), 2.78 - 2.58 (m, 1.76H), 1.90 (s, 3H), 1.88 (d,  $J$  = 0.8 Hz, 2.19H), 1.22 (t,  $J$  = 7.2 Hz, 2.24H), 1.12 (t,  $J$  = 7.2 Hz, 3H). **<sup>13</sup>C NMR** (101 MHz, CDCl<sub>3</sub>)  $\delta$  178.3, 178.2, 169.8 (d,  $J$  = 24.2 Hz), 169.6 (d,  $J$  = 23.2 Hz), 138.7, 137.3, 136.5, 136.4, 136.3, 136.2, 134.5, 134.4, 134.3, 134.2, 131.8, 131.7, 131.4 (d,  $J$  = 4.0 Hz), 131.3 (d,  $J$  = 4.0 Hz), 129.1, 129.0, 128.8, 128.7, 126.9 (d,  $J$  = 29.3 Hz), 126.7 (d,  $J$  = 29.3 Hz), 126.1, 125.9, 125.6 (d,  $J$  = 2.0 Hz), 125.6 (d,  $J$  = 2.0 Hz), 125.3, 124.9, 124.7, 124.1, 87.0 (d,  $J$  = 185.8 Hz), 86.8 (d,  $J$  = 185.8 Hz), 61.8, 61.7, 52.9, 52.8, 49.1, 48.7, 41.5 (d,  $J$  = 21.2 Hz), 40.6 (d,  $J$  = 20.2 Hz), 25.9 (d,  $J$  = 3.0 Hz), 25.6 (d,  $J$  = 2.0 Hz), 14.2, 14.0. **<sup>31</sup>P NMR** (162 MHz, CDCl<sub>3</sub>)  $\delta$  -12.9, -13.0. **<sup>19</sup>F NMR** (377 MHz, CDCl<sub>3</sub>)  $\delta$  -185.8, -187.7. **HRMS** (ESI)  $m/z$ : [M+H]<sup>+</sup> calcd for C<sub>31</sub>H<sub>31</sub>FO<sub>5</sub>P<sup>+</sup> 533.1888; found 533.1884.

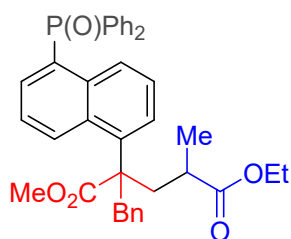

5-ethyl-1-methyl-2-benzyl-2-(5-(diphenylphosphoryl)naphthalen-1-yl)-4-methylpentanedioate (**4ad**)

The general procedure was applied to **1a** (31.2 mg, 0.1 mmol, 1 equiv), **2a** (52.8 mg, 0.3 mmol, 3.0 equiv), **3p** (54.3 mg, 0.3 mmol, 3.0 equiv), [RuCl<sub>2</sub>(*p*-cymene)]<sub>2</sub> (3.0 mg, 5.0 mol%), NaOAc (16.4 mg, 2.0 equiv) in PhCF<sub>3</sub> (1.0 mL) was stirred at 80 °C in heating mantle for 12 h under an atmosphere of argon. At ambient temperature, EtOAc (15 mL) was added, and the mixture was filtered through a short pad of silica gel. The solvent was removed in vacuo and the residue was purified by preparative chromatography ( $R_f$  = 0.5, PE/DCM/EA = 8/1/1) afforded the product, the product was oxidized by adding 1mL H<sub>2</sub>O<sub>2</sub>, then DCM (10mL) and H<sub>2</sub>O (10mL) were added for liquid separation to remove the water phase, The solvent was removed in vacuo and the residue was purified by preparative chromatography ( $R_f$  = 0.5, PE/DCM/EA = 1/1/1) afforded the product **4ad** (dr > 20:1)(38 mg, 63 % yield), **<sup>1</sup>H NMR** (400 MHz, CDCl<sub>3</sub>)  $\delta$  8.65 (d,  $J$  = 8.6 Hz, 1H), 8.10 (d,  $J$  = 8.6 Hz, 1H), 7.73 - 7.66 (m, 4H), 7.60 - 7.52 (m, 2H),



7.51 - 7.43 (m, 4H), 7.40 - 7.26 (m, 4H), 7.21 - 7.11 (m, 3H), 6.70 (d,  $J = 6.4$  Hz, 2H), 3.67 (d,  $J = 13.2$  Hz, 1H), 3.54 (s, 3H), 3.46 (d,  $J = 13.2$  Hz, 1H), 3.43 - 3.26 (m, 1H), 2.82 - 2.63 (m, 2H), 2.07 (dd,  $J = 14.4, 1.2$  Hz, 1H), 1.18 (d,  $J = 6.8$  Hz, 3H), 0.93 (t,  $J = 7.2$  Hz, 3H).  $^{13}\text{C}$  NMR (126 MHz,  $\text{CDCl}_3$ )  $\delta$  176.9, 175.9, 137.6, 136.4, 134.9 (d,  $J = 8.9$  Hz), 133.5, 133.4, 133.3, 132.8 (d,  $J = 8.9$  Hz), 132.6 (d,  $J = 22.7$  Hz), 132.4, 132.3, 132.2, 132.1, 132.0, 130.6, 130.3 (d,  $J = 102.0$  Hz), 128.8, 128.7, 128.0, 127.0, 126.1, 125.9, 124.4 (d,  $J = 13.9$  Hz), 60.3, 54.2, 52.2, 42.6, 37.3, 35.7, 20.2, 13.9.  $^{31}\text{P}$  NMR (202 MHz,  $\text{CDCl}_3$ )  $\delta$  33.1. HRMS (ESI)  $m/z$ :  $[\text{M}+\text{H}]^+$  calcd for  $\text{C}_{38}\text{H}_{38}\text{O}_5\text{P}^+$  605.2451; found 605.2446.

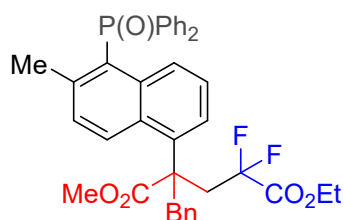

5-ethyl-1-methyl-2-benzyl-2-(5-(diphenylphosphoryl)-6-methylnaphthalen-1-yl)-4,4-difluoropentanedioate (**4ae**)

The general procedure was applied to **1b** (32.6 mg, 0.1 mmol, 1 equiv), **2a** (52.8 mg, 0.3 mmol, 3.0 equiv), **3a** (60.9 mg, 0.3 mmol, 3.0 equiv),  $[\text{RuCl}_2(p\text{-cymene})]_2$  (3.0 mg, 5.0 mol%), NaOAc (16.4 mg, 2.0 equiv) in  $\text{PhCF}_3$  (1.0 mL) was stirred at 80 °C in heating mantle for 12 h under an atmosphere of argon. At ambient temperature, EtOAc (15 mL) was added, and the mixture was filtered through a short pad of silica gel. The solvent was removed in vacuo and the residue was purified by preparative chromatography ( $R_f = 0.5$ , PE/DCM/EA = 10/1/1) afforded the product, the product was oxidized by adding 1mL  $\text{H}_2\text{O}_2$ , then DCM (10mL) and  $\text{H}_2\text{O}$  (10mL) were added for liquid separation to remove the water phase, The solvent was removed in vacuo and the residue was purified by preparative chromatography ( $R_f = 0.5$ , PE/DCM/EA = 1/1/1) afforded the product **4ae** (49 mg, 76 % yield),  $^1\text{H}$  NMR (400 MHz,  $\text{CDCl}_3$ )  $\delta$  8.56 (d,  $J = 8.8$  Hz, 1H), 7.96 (d,  $J = 8.8$  Hz, 1H), 7.72 - 7.65 (m, 4H), 7.57 - 7.48 (m, 3H), 7.47 - 7.42 (m, 4H), 7.32 - 7.26 (m, 4H), 7.22 (dd,  $J = 8.6, 7.8$  Hz, 1H), 7.12 - 6.99 (m, 2H), 4.00 (d,  $J = 13.2$  Hz, 1H), 3.64 - 3.49 (m, 5H), 3.41 - 3.29 (m, 1H), 3.25 - 3.16 (1, 4H), 2.96 (dd,  $J = 28.6, 15.6$  Hz, 1H), 2.27 (d,  $J = 1.2$  Hz, 3H), 0.98 (t,  $J = 7.2$  Hz, 3H).  $^{13}\text{C}$  NMR (126 MHz,  $\text{CDCl}_3$ )  $\delta$  175.6, 163.0 (t,  $J = 32.8$  Hz), 143.2 (d,  $J = 8.8$  Hz), 136.2, 136.1, 136.0, 135.9 135.8, 135.4, 135.1, 131.8, 131.7, 131.6, 131.1, 131.0, 130.9, 128.9, 128.8, 128.5 (d,  $J = 7.6$  Hz), 128.4, 127.6 (d,  $J = 2.5$  Hz), 127.4, 127.0, 126.2, 125.3, 116.1 (dd,  $J = 257.0, 248.2$  Hz), 62.7, 52.5, 52.1 (d,  $J = 3.8$  Hz), 42.3 (d,  $J = 3.8$  Hz), 36.9 - 36.6 (m), 24.6 (d,  $J = 5.0$  Hz), 13.6.  $^{31}\text{P}$  NMR (202 MHz,  $\text{CDCl}_3$ )  $\delta$  30.3.  $^{19}\text{F}$  NMR (471 MHz,  $\text{CDCl}_3$ )  $\delta$  -100.0 (d,  $J = 263.8$  Hz), -101.8 (d,  $J = 263.8$  Hz). HRMS (ESI)  $m/z$ :  $[\text{M}+\text{H}]^+$  calcd for  $\text{C}_{38}\text{H}_{36}\text{F}_2\text{O}_5\text{P}^+$  641.2263; found 641.2255.



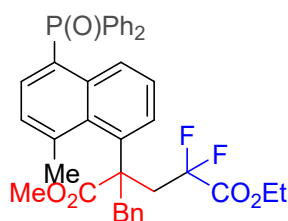

5-ethyl-1-methyl-2-benzyl-2-(5-(diphenylphosphoryl)-8-methylnaphthalen-1-yl)-4,4-difluoropentanedioate (**4af**)

The general procedure was applied to **1c** (32.6 mg, 0.1 mmol, 1 equiv), **2a** (52.8 mg, 0.3 mmol, 3.0 equiv), **3a** (60.9 mg, 0.3 mmol, 3.0 equiv), [RuCl<sub>2</sub>(*p*-cymene)]<sub>2</sub> (3.0 mg, 5.0 mol%), NaOAc (16.4 mg, 2.0 equiv) in PhCF<sub>3</sub> (1.0 mL) was stirred at 80 °C in heating mantle for 12 h under an atmosphere of argon. At ambient temperature, EtOAc (15 mL) was added, and the mixture was filtered through a short pad of silica gel. The solvent was removed in vacuo and the residue was purified by preparative chromatography (*R<sub>f</sub>* = 0.5, PE/DCM/EA = 10/1/1) afforded the product, the product was oxidized by adding 1mL H<sub>2</sub>O<sub>2</sub>, then DCM (10mL) and H<sub>2</sub>O (10mL) were added for liquid separation to remove the water phase, The solvent was removed in vacuo and the residue was purified by preparative chromatography (*R<sub>f</sub>* = 0.5, PE/DCM/EA = 1/1/1) afforded the product **4af** (24 mg, 38 % yield), <sup>1</sup>H NMR (400 MHz, CDCl<sub>3</sub>) δ 8.48 - 8.20 (m, 1H), 7.95 (dd, *J* = 8.8, 1.6 Hz, 1H), 7.76 - 7.68 (m, 4H), 7.55 - 7.41 (m, 7H), 7.31 - 7.26 (m, 2H), 7.19 - 7.08 (m, 3H), 6.80 (dd, *J* = 7.6, 1.6 Hz, 2H), 4.08 - 3.92 (m, 2H), 3.56 (s, 3H), 3.31 (q, *J* = 13.6 Hz, 2H), 2.81 - 2.57 (m, 5H), 1.19 (t, *J* = 7.2 Hz, 3H). <sup>13</sup>C NMR (126 MHz, CDCl<sub>3</sub>) δ 174.1, 163.8 (t, *J* = 32.8 Hz), 140.1 (d, *J* = 2.5 Hz), 138.9, 136.2, 134.4 (d, *J* = 10.1 Hz), 133.6 (d, *J* = 45.4 Hz), 133.3 (d, *J* = 6.3 Hz), 132.7 (d, *J* = 59.2 Hz), 132.3, 132.2, 132.1, 132.0, 131.9, 130.6, 128.8, 128.7, 128.2, 127.6 (d, *J* = 103.3 Hz), 126.9, 126.2 (d, *J* = 6.3 Hz), 125.9 (d, *J* = 13.9 Hz), 125.4, 124.8, 115.8 (dd, *J* = 253.3, 255.8 Hz), 62.9, 53.1, 52.4, 41.0, 37.5 (t, *J* = 121.4 Hz), 20.0, 13.9. <sup>31</sup>P NMR (202 MHz, CDCl<sub>3</sub>) δ 30.1. <sup>19</sup>F NMR (471 MHz, CDCl<sub>3</sub>) δ -100.0 (d, *J* = 263.8 Hz), -101.7 (d, *J* = 263.8 Hz). HRMS (ESI) *m/z*: [M+H]<sup>+</sup> calcd for C<sub>38</sub>H<sub>36</sub>F<sub>2</sub>O<sub>5</sub>P<sup>+</sup> 641.2263; found 641.2258.

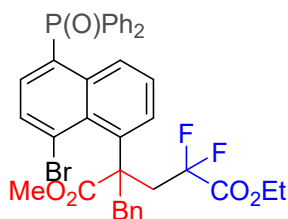

5-ethyl-1-methyl-2-benzyl-2-(8-bromo-5-(diphenylphosphoryl)naphthalen-1-yl)-4,4-difluoropentanedioate (**4ag**)

The general procedure was applied to **1d** (39.1 mg, 0.1 mmol, 1 equiv), **2a** (52.8 mg, 0.3 mmol, 3.0 equiv), **3a** (60.9 mg, 0.3 mmol, 3.0 equiv), [RuCl<sub>2</sub>(*p*-cymene)]<sub>2</sub> (3.0 mg, 5.0 mol%), NaOAc (16.4 mg, 2.0 equiv) in PhCF<sub>3</sub> (1.0 mL) was stirred at 80 °C in heating mantle for 12 h under an atmosphere of argon. At ambient temperature, EtOAc (15 mL) was added, and the mixture was filtered through a short pad of

silica gel. The solvent was removed in vacuo and the residue was purified by preparative chromatography ( $R_f = 0.5$ , PE/DCM/EA = 10/1/1) afforded the product, the product was oxidized by adding 1mL  $H_2O_2$ , then DCM (10mL) and  $H_2O$  (10mL) were added for liquid separation to remove the water phase, The solvent was removed in vacuo and the residue was purified by preparative chromatography ( $R_f = 0.5$ , PE/DCM/EA = 1/1/1) afforded the product **4ag** (30 mg, 42 % yield),  $^1H$  NMR (400 MHz,  $CDCl_3$ )  $\delta$  8.70 (d,  $J = 8.4$  Hz, 1H), 8.07 (d,  $J = 8.8$  Hz, 1H), 7.72 - 7.54 (m, 7H), 7.51 - 7.37 (m, 6H), 7.33 - 7.27 (m, 3H), 7.11 - 6.97 (m, 2H), 4.02 (d,  $J = 13.2$  Hz, 1H), 3.61 - 3.31 (m, 6H), 3.25 - 3.12 (m, 1H), 2.96 (dd,  $J = 28.4, 15.6$  Hz, 1H), 0.97 (t,  $J = 7.2$  Hz, 3H).  $^{13}C$  NMR (126 MHz,  $CDCl_3$ )  $\delta$  175.6, 163.1 (t,  $J = 32.8$  Hz), 136.6, 135.8, 134.8 (d,  $J = 7.6$  Hz), 133.4 (d,  $J = 3.8$  Hz), 133.3 (d,  $J = 6.3$  Hz), 132.6, 132.5 (d,  $J = 30.2$  Hz), 132.3, 132.2, 132.1, 130.9, 130.7 (d,  $J = 100.8$  Hz), 128.8, 128.7, 128.6 (d,  $J = 6.3$  Hz), 128.5, 128.2 (d,  $J = 1.3$  Hz), 127.4, 126.5, 124.8 (d,  $J = 13.9$  Hz), 116.1 (dd,  $J = 257.0, 248.2$  Hz), 62.8, 52.5, 52.2 (d,  $J = 5.0$  Hz), 42.3 (d,  $J = 2.5$  Hz), 36.8 (dd,  $J = 21.4, 18.9$  Hz), 13.6.  $^{31}P$  NMR (202 MHz,  $CDCl_3$ )  $\delta$  32.7.  $^{19}F$  NMR (471 MHz,  $CDCl_3$ )  $\delta$  -105.5, -106.0. HRMS (ESI)  $m/z$ :  $[M+H]^+$  calcd for  $C_{37}H_{33}BrF_2O_5P^+$  705.1212; found 705.1206.

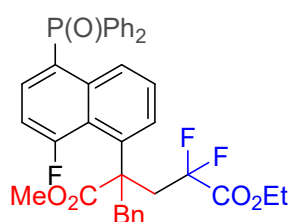

5-ethyl-1-methyl-2-benzyl-2-(5-(diphenylphosphoryl)-8-fluoronaphthalen-1-yl)-4,4-difluoropentanedioate (**4ah**)

The general procedure was applied to **1e** (33.0 mg, 0.1 mmol, 1 equiv), **2a** (52.8 mg, 0.3 mmol, 3.0 equiv), **3a** (60.9 mg, 0.3 mmol, 3.0 equiv),  $[RuCl_2(p\text{-cymene})]_2$  (3.0 mg, 5.0 mol%), NaOAc (16.4 mg, 2.0 equiv) in  $PhCF_3$  (1.0 mL) was stirred at 80 °C in heating mantle for 12 h under an atmosphere of argon. At ambient temperature, EtOAc (15 mL) was added, and the mixture was filtered through a short pad of silica gel. The solvent was removed in vacuo and the residue was purified by preparative chromatography ( $R_f = 0.5$ , PE/DCM/EA = 10/1/1) afforded the product, the product was oxidized by adding 1mL  $H_2O_2$ , then DCM (10mL) and  $H_2O$  (10mL) were added for liquid separation to remove the water phase, The solvent was removed in vacuo and the residue was purified by preparative chromatography ( $R_f = 0.5$ , PE/DCM/EA = 1/1/1) afforded the product **4ah** (17 mg, 26 % yield),  $^1H$  NMR (400 MHz,  $CDCl_3$ )  $\delta$  8.76 (d,  $J = 8.4$  Hz, 1H), 7.98 - 7.54 (m, 7H), 7.53 - 7.43 (m, 5H), 7.34 - 7.24 (m, 4H), 7.24 - 7.00 (m, 3H), 4.18 - 3.80 (m, 1H), 3.77 - 2.82 (m, 8H), 1.12 - 0.90 (m, 3H).  $^{13}C$  NMR (126 MHz,  $CDCl_3$ )  $\delta$  163.4 (d,  $J = 34.0$  Hz), 162.4 (d,  $J = 2.5$  Hz), 160.3, 137.8 (dd,  $J = 8.8, 6.3$  Hz), 136.4, 134.9 (m), 134.5, 134.4, 134.3, 133.2, 132.4, 132.2, 130.9, 130.0 (d,  $J = 2.5$  Hz), 128.9, 128.8, 128.6 (d,  $J = 5.0$  Hz), 128.3, 127.4 (d,  $J = 3.8$  Hz), 127.3, 127.1, 126.6 (d,  $J = 2.5$  Hz), 123.4 - 123.2 (m), 116.4 (t,  $J = 252.0$  Hz), 111.1 - 110.7 (m), 62.8, 53.6, 51.7 - 51.5 (m), 44.5 - 43.9 (m), 13.6.  $^{31}P$  NMR (162 MHz,  $CDCl_3$ )  $\delta$  32.4.  $^{19}F$  NMR (377

MHz, CDCl<sub>3</sub>)  $\delta$  -97.8, -99.2, -104.6. **HRMS** (ESI)  $m/z$ : [M+H]<sup>+</sup> calcd for C<sub>37</sub>H<sub>33</sub>F<sub>3</sub>O<sub>5</sub>P<sup>+</sup> 645.2012; found 645.2007.

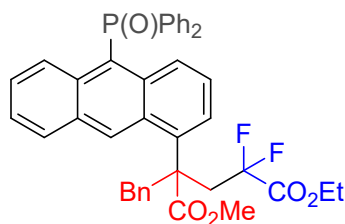

5-ethyl-1-methyl-2-benzyl-2-(10-(diphenylphosphoryl)anthracen-1-yl)-4,4-difluoropentanedioate (**4ai**)

The general procedure was applied to **1f** (36.2 mg, 0.1 mmol, 1 equiv), **2a** (52.8 mg, 0.3 mmol, 3.0 equiv), **3a** (60.9 mg, 0.3 mmol, 3.0 equiv), [RuCl<sub>2</sub>(*p*-cymene)]<sub>2</sub> (3.0 mg, 5.0 mol%), NaOAc (16.4 mg, 2.0 equiv) in PhCF<sub>3</sub> (1.0 mL) was stirred at 80 °C in heating mantle for 12 h under an atmosphere of argon. At ambient temperature, EtOAc (15 mL) was added, and the mixture was filtered through a short pad of silica gel. The solvent was removed in vacuo and the residue was purified by preparative chromatography ( $R_f$  = 0.5, PE/DCM/EA = 10/1/1) afforded the product, the product was oxidized by adding 1mL H<sub>2</sub>O<sub>2</sub>, then DCM (10mL) and H<sub>2</sub>O (10mL) were added for liquid separation to remove the water phase, The solvent was removed in vacuo and the residue was purified by preparative chromatography ( $R_f$  = 0.5, PE/DCM/EA = 1/1/1) afforded the product **4ai** (31 mg, 46 % yield), **<sup>1</sup>H NMR** (400 MHz, CDCl<sub>3</sub>)  $\delta$  8.76 (s, 1H), 8.70 (d,  $J$  = 9.2 Hz, 1H), 8.51 (d,  $J$  = 9.2 Hz, 1H), 7.95 (d,  $J$  = 8.4 Hz, 1H), 7.75 - 7.66 (m, 4H), 7.58 - 7.49 (m, 3H), 7.45 - 7.39 (m, 5H), 7.32 - 7.26 (m, 3H), 7.26 - 7.20 (m, 2H), 7.14 - 7.05 (m, 2H), 4.09 (d,  $J$  = 13.2 Hz, 1H), 3.68 - 3.48 (m, 5H), 3.43 - 3.27 (m, 1H), 3.24 - 2.94 (m, 2H), 0.80 (t,  $J$  = 7.2 Hz, 3H). **<sup>13</sup>C NMR** (126 MHz, CDCl<sub>3</sub>)  $\delta$  175.7, 163.0 (t,  $J$  = 32.8 Hz), 136.4 (d,  $J$  = 16.4 Hz), 136.3, 136.2 (d,  $J$  = 8.8 Hz), 135.8, 135.6 (d,  $J$  = 15.1 Hz), 134.4 (d,  $J$  = 8.8 Hz), 131.8, 131.7, 131.6, 131.4 (d,  $J$  = 11.3 Hz), 131.0, 129.9, 129.8 (d,  $J$  = 1.3 Hz), 129.7, 129.0, 128.9, 128.5, 128.4, 127.5, 127.1, 127.0, 125.7, 125.5, 125.3, 124.8 (d,  $J$  = 98.3 Hz), 116.1 (dd,  $J$  = 257.0, 248.2 Hz), 62.7, 52.6, 52.4 (d,  $J$  = 5.0 Hz), 42.4 (d,  $J$  = 2.5 Hz), 36.9 (d,  $J$  = 22.7 Hz), 13.4. **<sup>31</sup>P NMR** (162 MHz, CDCl<sub>3</sub>)  $\delta$  31.5. **<sup>19</sup>F NMR** (377 MHz, CDCl<sub>3</sub>)  $\delta$  -105.6, -106.3. **HRMS** (ESI)  $m/z$ : [M+H]<sup>+</sup> calcd for C<sub>41</sub>H<sub>36</sub>F<sub>2</sub>O<sub>5</sub>P<sup>+</sup> 677.2263; found 677.2257.

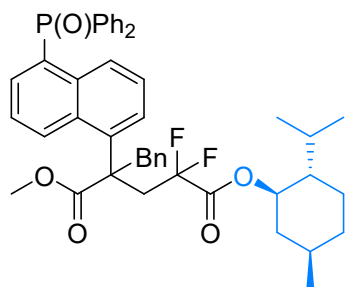

5-((1R,2S,5R)-2-isopropyl-5-methylcyclohexyl)-1-methyl-2-benzyl-2-(5-(diphenylphosphoryl)naphthalen-1-yl)-4,4-difluoropentanedioate (**7a**)

The general procedure was applied to **1a** (31.2 mg, 0.1 mmol, 1 equiv), **2a** (52.8 mg, 0.3 mmol, 3.0 equiv), **3r** (93.9 mg, 0.3 mmol, 3.0 equiv), [RuCl<sub>2</sub>(*p*-cymene)]<sub>2</sub> (3.0 mg, 5.0 mol%), NaOAc (16.4 mg, 2.0 equiv) in PhCF<sub>3</sub> (1.0 mL) was stirred at 80 °C in heating mantle for 12 h under an atmosphere of argon. At ambient temperature, EtOAc (15 mL) was added, and the mixture was filtered through a short pad of silica gel. The solvent was removed in vacuo and the residue was purified by preparative chromatography (*R*<sub>f</sub> = 0.5, PE/DCM/EA = 10/1/1) afforded the product, the product was oxidized by adding 1mL H<sub>2</sub>O<sub>2</sub>, then DCM (10mL) and H<sub>2</sub>O (10mL) were added for liquid separation to remove the water phase, The solvent was removed in vacuo and the residue was purified by preparative chromatography (*R*<sub>f</sub> = 0.5, PE/DCM/EA = 1/1/1) afforded the product **7a** (dr = 1:1) (55 mg, 75 % yield), <sup>1</sup>H NMR (400 MHz, CDCl<sub>3</sub>) δ 8.71 - 8.66 (m, 1H), 8.16 - 8.12 (m, 1H), 7.71 - 7.64 (m, 4H), 7.59 - 7.35 (m, 9H), 7.30 - 7.17 (m, 4H), 6.98 - 6.69 (m, 2H), 4.73 - 4.64 (m, 1H), 3.96 (dd, *J* = 13.2, 7.2 Hz, 1H), 3.70 (dd, *J* = 13.2, 2.8 Hz, 1H), 3.59 (s, 3H), 3.07 - 2.81 (m, 2H), 1.90 - 1.68 (m, 5H), 1.51 - 1.37 (m, 2H), 1.10 - 0.95 (m, 2H), 0.92 - 0.86 (m, 6H), 0.71 (t, *J* = 6.8 Hz, 3H). <sup>13</sup>C NMR (126 MHz, CDCl<sub>3</sub>) δ 175.9, 163.5 (t, *J* = 31.5 Hz), 163.5 (t, *J* = 31.5 Hz), 137.7, 137.5, 135.9, 135.0 (d, *J* = 8.8 Hz), 135.0 (d, *J* = 7.6 Hz), 133.4, 133.3, 133.2, 132.6, 132.5 (d, *J* = 3.8 Hz), 132.3, 132.2, 132.1, 130.8, 130.7 (d, *J* = 102.1 Hz), 130.6 (d, *J* = 102.1 Hz), 128.8, 128.7, 128.4, 128.3, 128.2, 127.2 (d, *J* = 5.0 Hz), 126.4, 125.8, 125.7, 124.7 (d, *J* = 15.1 Hz), 116.2 (t, *J* = 254.5 Hz), 116.1 (t, *J* = 255.8 Hz), 77.9, 52.6, 52.2, 47.0, 42.1 (d, *J* = 2.5 Hz), 40.4, 40.3, 37.0 (t, *J* = 20.2 Hz), 34.1, 31.5, 26.3, 23.5, 22.0, 20.8, 16.3. <sup>31</sup>P NMR (202 MHz, CDCl<sub>3</sub>) δ 33.2, 33.1. <sup>19</sup>F NMR (471 MHz, CDCl<sub>3</sub>) δ -103.6, -103.8, -104.0, -104.5. HRMS (ESI) *m/z*: [M+H]<sup>+</sup> calcd for C<sub>45</sub>H<sub>48</sub>F<sub>2</sub>O<sub>5</sub>P<sup>+</sup> 737.3202; found 737.3201.

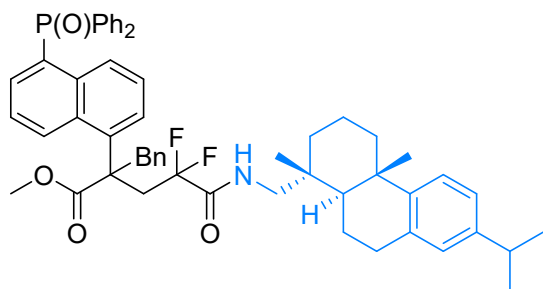

Methyl-2-benzyl-2-(5-(diphenylphosphoryl)naphthalen-1-yl)-4,4-difluoro-5-((((1R,4aS,10aR)-7-isopropyl-1,4a-dimethyl-1,2,3,4,4a,9,10,10a-octahydrophenanthren-1-yl)methyl)amino)-5-oxopentanoate (**7b**)

The general procedure was applied to **1a** (31.2 mg, 0.1 mmol, 1 equiv), **2a** (52.8 mg, 0.3 mmol, 3.0 equiv), **3s** (132.6 mg, 0.3 mmol, 3.0 equiv), [RuCl<sub>2</sub>(*p*-cymene)]<sub>2</sub> (3.0 mg, 5.0 mol%), NaOAc (16.4 mg, 2.0 equiv) in PhCF<sub>3</sub> (1.0 mL) was stirred at 80 °C in heating mantle for 12 h under an atmosphere of argon. At ambient temperature, EtOAc (15 mL) was added, and the mixture was filtered through a short pad of silica gel. The solvent was removed in vacuo and the residue was purified by preparative chromatography (*R*<sub>f</sub> = 0.5, PE/DCM/EA = 8/1/1) afforded the product, the product was oxidized by adding 1mL H<sub>2</sub>O<sub>2</sub>,

then DCM (10mL) and H<sub>2</sub>O (10mL) were added for liquid separation to remove the water phase, The solvent was removed in vacuo and the residue was purified by preparative chromatography ( $R_f$  = 0.3, PE/DCM/EA = 1/1/1) afforded the product **7b** (dr = 1:1) (35 mg, 40 % yield), **<sup>1</sup>H NMR** (400 MHz, CDCl<sub>3</sub>)  $\delta$  8.71 (dd,  $J$  = 8.4, 4.8 Hz, 2H), 8.10 - 8.05 (m, 2H), 7.71 - 7.62 (m, 8H), 7.58 - 7.29 (m, 18H), 7.27 - 7.23 (m, 2H), 7.18 - 7.13 (m, 8H), 7.02 - 6.73 (m, 8H), 5.95 (s, 2H), 3.87 (d,  $J$  = 13.2 Hz, 2H), 3.70 - 3.47 (m, 8H), 3.19 - 2.66 (m, 14H), 2.32 - 2.22 (m, 2H), 1.78 - 1.59 (m, 8H), 1.37 - 1.27 (m, 6H), 1.23 - 1.06 (m, 20H), 0.89 (s, 3H), 0.88 (s, 3H). **<sup>13</sup>C NMR** (126 MHz, CDCl<sub>3</sub>)  $\delta$  175.9, 163.9 (t,  $J$  = 32.8 Hz), 163.7 (t,  $J$  = 27.7 Hz), 147.0, 146.9, 145.8, 137.6, 137.4, 135.8, 135.0 (d,  $J$  = 7.6 Hz), 135.0 (d,  $J$  = 8.8 Hz), 134.7, 134.6, 133.5 (d,  $J$  = 6.3 Hz), 133.4, 133.3, 132.5 (d,  $J$  = 21.4 Hz), 132.5, 132.4, 132.3, 132.2, 132.1, 130.8, 130.5 (d,  $J$  = 102.1 Hz), 130.5 (d,  $J$  = 102.1 Hz), 128.8, 128.7, 128.5, 128.4, 128.3, 128.2, 127.2, 127.0, 126.2, 125.8, 124.8, 124.6, 124.3, 124.1, 124.0, 118.1 (t,  $J$  = 255.8 Hz), 52.5, 52.0, 49.9, 45.9, 45.8, 42.2, 38.4, 38.3, 37.6, 37.5, 37.4, 36.8 - 36.4 (m), 36.3, 36.1, 33.6, 33.5, 30.3, 25.4, 24.1, 19.1, 18.6. **<sup>31</sup>P NMR** (202 MHz, CDCl<sub>3</sub>)  $\delta$  33.3, 33.2. **<sup>19</sup>F NMR** (471 MHz, CDCl<sub>3</sub>)  $\delta$  -103.8, -104.3, -104.9. **HRMS** (ESI)  $m/z$ :  $[M+H]^+$  calcd for C<sub>55</sub>H<sub>59</sub>F<sub>2</sub>NO<sub>4</sub>P<sup>+</sup> 866.4144; found 866.4138.

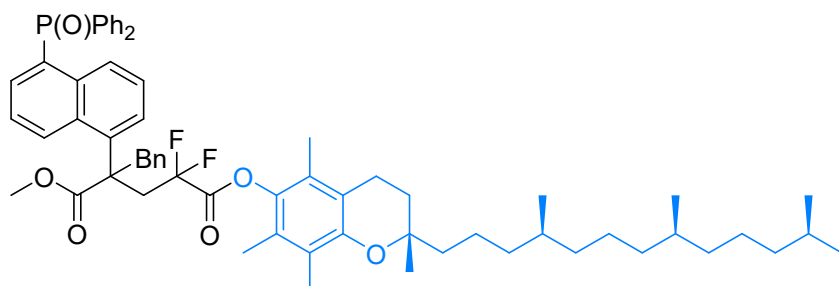

1-methyl-5-((S)-2,5,7,8-tetramethyl-2-((4S,8S)-4,8,12-trimethyltridecyl)chroman-6-yl)-2-benzyl-2-(5-(diphenylphosphoryl)naphthalen-1-yl)-4,4-difluoropentanedioate (**7c**)

The general procedure was applied to **1a** (31.2 mg, 0.1 mmol, 1 equiv), **2a** (52.8 mg, 0.3 mmol, 3.0 equiv), **3t** (176.1 mg, 0.3 mmol, 3.0 equiv), [RuCl<sub>2</sub>(*p*-cymene)]<sub>2</sub> (3.0 mg, 5.0 mol%), NaOAc (16.4 mg, 2.0 equiv) in PhCF<sub>3</sub> (1.0 mL) was stirred at 80 °C in heating mantle for 12 h under an atmosphere of argon. At ambient temperature, EtOAc (15 mL) was added, and the mixture was filtered through a short pad of silica gel. The solvent was removed in vacuo and the residue was purified by preparative chromatography ( $R_f$  = 0.5, PE/DCM/EA = 10/1/1) afforded the product, the product was oxidized by adding 1mL H<sub>2</sub>O<sub>2</sub>, then DCM (10mL) and H<sub>2</sub>O (10mL) were added for liquid separation to remove the water phase, The solvent was removed in vacuo and the residue was purified by preparative chromatography ( $R_f$  = 0.5, PE/DCM/EA = 1/1/1) afforded the product **7c** (45 mg, 45 % yield), **<sup>1</sup>H NMR** (400 MHz, CDCl<sub>3</sub>)  $\delta$  8.71 (d,  $J$  = 8.8 Hz, 1H), 8.18 (d,  $J$  = 8.8 Hz, 1H), 7.74 - 7.65 (m, 4H), 7.60 - 7.53 (m, 2H), 7.51 - 7.38 (m, 4H), 7.32 - 7.26 (m, 1H), 7.22 - 7.14 (m, 3H), 6.92 - 6.79 (m, 2H), 4.02 (d,  $J$  = 13.2 Hz, 1H), 3.78 (d,  $J$  = 13.2 Hz, 1H), 3.63 (s, 3H), 3.24 - 3.04 (m, 1H), 2.58 (t,  $J$  = 6.8 Hz, 2H), 2.08 (s, 3H), 1.95 (s, 3H), 1.91 (s, 3H), 1.85 - 1.72 (m, 3H), 1.60 - 1.49 (m, 3H), 1.44 - 1.33 (m, 4H), 1.30 - 1.24 (m, 8H), 1.16 - 1.04 (m,

6H), 0.88 - 0.83 (m, 12H).  $^{13}\text{C}$  NMR (126 MHz,  $\text{CDCl}_3$ )  $\delta$  175.9, 162.6 (t,  $J = 32.8$  Hz), 150.2, 139.7, 137.6, 135.9, 135.1 (d,  $J = 7.6$  Hz), 133.3 (d,  $J = 12.6$  Hz), 132.5 (d,  $J = 11.3$  Hz), 132.4, 132.3, 132.2, 132.1, 130.8, 130.7 (d,  $J = 102.1$  Hz), 128.8, 128.7, 128.4 (d,  $J = 7.6$  Hz), 128.3, 128.1, 127.3, 126.5, 126.3, 125.8, 124.8 (d,  $J = 15.1$  Hz), 124.6, 123.6, 117.9, 116.5 (t,  $J = 255.8$  Hz), 75.4, 52.7, 52.3, 42.2, 39.5, 37.7 - 37.4 (m), 37.2 (d,  $J = 20.2$  Hz), 32.9, 32.8, 31.1 (d,  $J = 5.0$  Hz), 28.1, 24.9, 24.6, 24.0, 22.9, 22.8, 21.1, 20.7, 19.9, 19.8, 19.7, 12.8, 12.0, 11.9.  $^{31}\text{P}$  NMR (202 MHz,  $\text{CDCl}_3$ )  $\delta$  33.3.  $^{19}\text{F}$  NMR (471 MHz,  $\text{CDCl}_3$ )  $\delta$  -102.3 (d,  $J = 259.1$  Hz), -105.1 (d,  $J = 244.9$  Hz). HRMS (ESI)  $m/z$ :  $[\text{M}+\text{H}]^+$  calcd for  $\text{C}_{64}\text{H}_{78}\text{F}_2\text{O}_6\text{P}^+$  1011.5499; found 1011.5480.

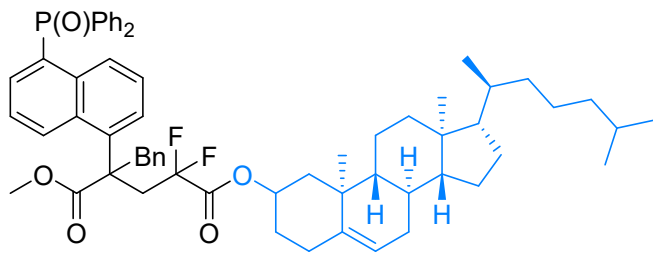

5-((8R,9R,10S,13S,14R,17S)-10,13-dimethyl-17-((S)-6-methylheptan-2-yl)-2,3,4,7,8,9,10,11,12,13,14,15,16,17-tetradecahydro-1H-cyclopenta[a]phenanthren-2-yl)-1-methyl-2-benzyl-2-(5-(diphenylphosphoryl)naphthalen-1-yl)-4,4-difluoropentanedioate (**7d**)

The general procedure was applied to **1a** (31.2 mg, 0.1 mmol, 1 equiv), **2a** (52.8 mg, 0.3 mmol, 3.0 equiv), **3u** (162.9 mg, 0.3 mmol, 3.0 equiv),  $[\text{RuCl}_2(p\text{-cymene})]_2$  (3.0 mg, 5.0 mol%), NaOAc (16.4 mg, 2.0 equiv) in  $\text{PhCF}_3$  (1.0 mL) was stirred at 80 °C in heating mantle for 12 h under an atmosphere of argon. At ambient temperature, EtOAc (15 mL) was added, and the mixture was filtered through a short pad of silica gel. The solvent was removed in vacuo and the residue was purified by preparative chromatography ( $R_f = 0.5$ , PE/DCM/EA = 10/1/1) afforded the product, the product was oxidized by adding 1mL  $\text{H}_2\text{O}_2$ , then DCM (10mL) and  $\text{H}_2\text{O}$  (10mL) were added for liquid separation to remove the water phase, The solvent was removed in vacuo and the residue was purified by preparative chromatography ( $R_f = 0.5$ , PE/DCM/EA = 1/1/1) afforded the product **7d** (dr = 1:1) (66 mg, 68 % yield),  $^1\text{H}$  NMR (400 MHz,  $\text{CDCl}_3$ )  $\delta$  8.67 (d,  $J = 8.0$  Hz, 1H), 8.10 (d,  $J = 8.8$  Hz, 1H), 7.71 - 7.64 (m, 4H), 7.60 - 7.44 (m, 7H), 7.43 - 7.36 (m, 2H), 7.30 - 7.24 (m, 4H), 7.06 - 6.86 (m, 2H), 5.42 - 5.22 (m, 1H), 4.32 - 4.09 (m, 1H), 4.00 (dd,  $J = 13.2, 5.6$  Hz, 1H), 3.63 - 3.56 (m, 4H), 3.18 - 2.88 (m, 2H), 2.25 (d,  $J = 7.6$  Hz, 1H), 2.19 - 1.94 (m, 3H), 1.89 - 1.77 (m, 4H), 1.62 - 1.39 (m, 8H), 1.37 - 1.30 (m, 3H), 1.19 - 1.02 (m, 7H), 1.00 - 0.97 (m, 4H), 0.95 - 0.90 (m, 4H), 0.87 (d,  $J = 1.6$  Hz, 3H), 0.86 (d,  $J = 1.6$  Hz, 3H), 0.68 (s, 3H).  $^{13}\text{C}$  NMR (126 MHz,  $\text{CDCl}_3$ )  $\delta$  175.7, 162.8 (t,  $J = 32.8$  Hz), 162.7 (d,  $J = 31.5$  Hz), 139.0, 138.8, 137.1, 137.0, 135.9, 135.0 (d,  $J = 7.6$  Hz), 134.9 (d,  $J = 8.8$  Hz), 133.5 - 133.2 (m), 132.6 - 132.1 (m), 130.9, 130.7 (d,  $J = 102.1$  Hz), 130.6 (d,  $J = 102.1$  Hz), 128.9, 128.8, 128.7, 128.6, 128.5, 128.3, 128.1, 127.5, 127.3, 126.5, 126.2, 124.8, 124.7, 123.5, 123.4, 116.1 (t,  $J = 253.3$  Hz), 116.0 (t,  $J = 254.5$  Hz), 56.9, 56.8, 56.3, 52.5, 52.2, 50.1, 42.5, 42.2, 39.9, 39.7, 37.6, 37.3, 37.1 - 37.0 (m), 36.8, 36.7, 36.6, 36.3, 35.9, 32.0, 31.9,

28.3, 28.1, 27.3, 27.2, 24.4, 24.0, 23.0, 22.7, 21.2, 21.1, 19.4, 18.9, 12.0. **<sup>31</sup>P NMR** (202 MHz, CDCl<sub>3</sub>) δ 33.0, 32.8. **<sup>19</sup>F NMR** (471 MHz, CDCl<sub>3</sub>) δ -104.0, -104.6, -104.7, -105.3. **HRMS** (ESI) m/z: [M+H]<sup>+</sup> calcd for C<sub>62</sub>H<sub>74</sub>F<sub>2</sub>O<sub>5</sub>P<sup>+</sup> 967.5236; found 967.5236.

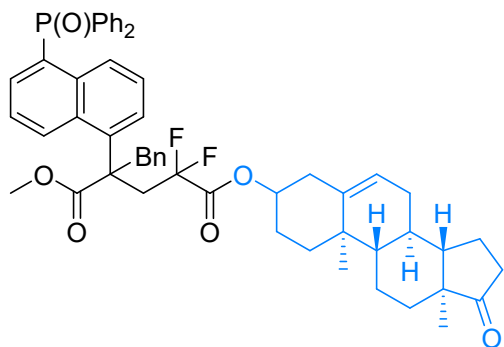

5-((8R,9S,10R,13S,14S)-10,13-dimethyl-17-oxo-2,3,4,7,8,9,10,11,12,13,14,15,16,17-tetradecahydro-1H-cyclopenta[a]phenanthren-3-yl)-1-methyl-2-benzyl-2-(5-(diphenylphosphoryl)naphthalen-1-yl)-4,4-difluoropentanedioate (**7e**)

The general procedure was applied to **1a** (31.2 mg, 0.1 mmol, 1 equiv), **2a** (52.8 mg, 0.3 mmol, 3.0 equiv), **3v** (133.5 mg, 0.3 mmol, 3.0 equiv), [RuCl<sub>2</sub>(*p*-cymene)]<sub>2</sub> (3.0 mg, 5.0 mol%), NaOAc (16.4 mg, 2.0 equiv) in PhCF<sub>3</sub> (1.0 mL) was stirred at 80 °C in heating mantle for 12 h under an atmosphere of argon. At ambient temperature, EtOAc (15 mL) was added, and the mixture was filtered through a short pad of silica gel. The solvent was removed in vacuo and the residue was purified by preparative chromatography (R<sub>f</sub> = 0.5, PE/DCM/EA = 8/1/1) afforded the product, the product was oxidized by adding 1mL H<sub>2</sub>O<sub>2</sub>, then DCM (10mL) and H<sub>2</sub>O (10mL) were added for liquid separation to remove the water phase, The solvent was removed in vacuo and the residue was purified by preparative chromatography (R<sub>f</sub> = 0.3, PE/DCM/EA = 1/1/1) afforded the product **7e** (dr = 1:1) (61 mg, 70 % yield), **<sup>1</sup>H NMR** (400 MHz, CDCl<sub>3</sub>) δ 8.69 (dd, *J* = 8.2, 5.2 Hz, 1H), 8.10 (d, *J* = 8.8 Hz, 1H), 7.70 - 7.65 (m, 4H), 7.59 - 7.53 (m, 3H), 7.49 - 7.46 (m, 4H), 7.42 - 7.36 (m, 2H), 7.31 - 7.25 (m, 4H), 7.02 - 6.90 (m, 2H), 5.41 - 5.35 (m, 1H), 4.29 - 4.14 (m, 1H), 4.01 (d, *J* = 12.8 Hz, 1H), 3.64 - 3.55 (m, 4H), 3.17 - 3.04 (m, 1H), 3.00 - 2.87 (m, 1H), 2.47 (dd, *J* = 19.2, 9.2 Hz, 1H), 2.31 - 2.23 (m, 1H), 2.19 - 2.05 (m, 3H), 1.98 - 1.93 (m, 1H), 1.89 - 1.75 (m, 3H), 1.67 - 1.63 (m, 2H), 1.59 - 1.38 (m, 4H), 1.35 - 1.28 (m, 2H), 1.06 - 0.97 (m, 5H), 0.89 (s, 3H). **<sup>13</sup>C NMR** (126 MHz, CDCl<sub>3</sub>) δ 175.7, 162.7 (d, *J* = 31.5 Hz), 139.2, 139.1, 137.0 (d, *J* = 2.2 Hz), 135.8, 135.0 - 134.9 (m), 133.4 - 133.2 (m), 132.5 - 132.1 (m), 130.9, 130.7 (d, *J* = 102.1 Hz), 130.6 (d, *J* = 102.1 Hz), 128.8, 128.7, 128.6 - 128.5 (m), 128.3, 128.1 (d, *J* = 5.0 Hz), 127.3, 126.5, 126.2, 124.8, 124.7, 122.7, 122.7, 116.0 (t, *J* = 252.0 Hz), 116.0 (t, *J* = 248.2 Hz), 52.5, 52.2, 51.8, 50.2, 50.1, 47.6, 42.2, 37.5, 37.3, 36.9 - 36.7 (m), 36.6, 35.9, 31.5, 30.9, 29.8, 27.2, 27.0, 22.0, 20.4, 19.4, 13.6. **<sup>31</sup>P NMR** (202 MHz, CDCl<sub>3</sub>) δ 33.0, 32.9. **<sup>19</sup>F NMR** (471 MHz, CDCl<sub>3</sub>) δ -104.0, -104.5, -104.5, -105.1. **HRMS** (ESI) m/z: [M+H]<sup>+</sup> calcd for C<sub>54</sub>H<sub>56</sub>F<sub>2</sub>O<sub>6</sub>P<sup>+</sup> 869.3777; found 869.3771.



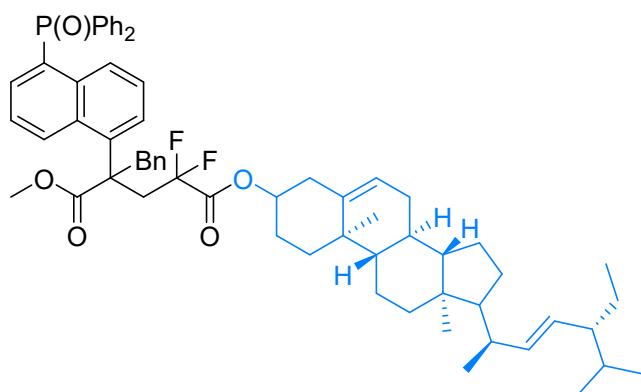

5-((8S,9S,10R,13R,14S)-17-((2R,5R,E)-5-ethyl-6-methylhept-3-en-2-yl)-10,13-dimethyl-2,3,4,7,8,9,10,11,12,13,14,15,16,17-tetradecahydro-1H-cyclopenta[a]phenanthren-3-yl)-1-methyl-2-benzyl-2-(5-(diphenylphosphoryl)naphthalen-1-yl)-4,4-difluoropentanedioate (**7f**)

The general procedure was applied to **1a** (31.2 mg, 0.1 mmol, 1 equiv), **2a** (52.8 mg, 0.3 mmol, 3.0 equiv), **3w** (170.7 mg, 0.3 mmol, 3.0 equiv), [RuCl<sub>2</sub>(*p*-cymene)]<sub>2</sub> (3.0 mg, 5.0 mol%), NaOAc (16.4 mg, 2.0 equiv) in PhCF<sub>3</sub> (1.0 mL) was stirred at 80 °C in heating mantle for 12 h under an atmosphere of argon. At ambient temperature, EtOAc (15 mL) was added, and the mixture was filtered through a short pad of silica gel. The solvent was removed in vacuo and the residue was purified by preparative chromatography (*R*<sub>f</sub> = 0.5, PE/DCM/EA = 10/1/1) afforded the product, the product was oxidized by adding 1mL H<sub>2</sub>O<sub>2</sub>, then DCM (10mL) and H<sub>2</sub>O (10mL) were added for liquid separation to remove the water phase, The solvent was removed in vacuo and the residue was purified by preparative chromatography (*R*<sub>f</sub> = 0.3, PE/DCM/EA = 1/1/1) afforded the product **7f** (dr = 1:1) (58 mg, 58 % yield), <sup>1</sup>H NMR (400 MHz, CDCl<sub>3</sub>) δ 8.68 (d, *J* = 8.4 Hz, 1H), 8.10 (d, *J* = 8.8 Hz, 1H), 7.72 - 7.64 (m, 4H), 7.60 - 7.51 (m, 3H), 7.51 - 7.44 (m, 4H), 7.42 - 7.36 (m, 2H), 7.29 (dd, *J* = 6.8, 4.4 Hz, 1H), 7.26 - 7.21 (m, 3H), 7.09 - 6.87 (m, 2H), 5.36 - 5.29 (m, 1H), 5.16 (dd, *J* = 15.2, 8.8 Hz, 1H), 5.02 (dd, *J* = 15.2, 8.8 Hz, 1H), 4.30 - 4.10 (m, 1H), 4.01 (dd, *J* = 13.2, 5.6 Hz, 1H), 3.63 - 3.56 (m, 4H), 3.19 - 2.89 (m, 2H), 2.25 (d, *J* = 7.8 Hz, 1H), 2.18 - 1.91 (m, 5H), 1.86 - 1.63 (m, 3H), 1.56 - 1.39 (m, 9H), 1.28 - 1.15 (m, 4H), 1.04 - 1.02 (m, 4H), 0.97 (s, 3H), 0.86 - 0.78 (m, 9H), 0.70 (s, 3H). <sup>13</sup>C NMR (126 MHz, CDCl<sub>3</sub>) δ 175.7, 162.8 (t, *J* = 32.8 Hz), 162.7 (t, *J* = 32.8 Hz), 139.0, 138.8, 138.4, 137.1, 137.0, 135.9, 135.0 (d, *J* = 8.8 Hz), 134.9 (d, *J* = 7.6 Hz), 133.5 (d, *J* = 7.6 Hz), 133.3, 133.2, 132.6 (d, *J* = 7.6 Hz), 132.5 - 132.1 (m), 130.9, 130.7 (d, *J* = 102.1 Hz), 130. (d, *J* = 102.1 Hz), 129.5, 128.9, 128.8, 128.7, 128.6, 128.5, 128.3, 128.1, 127.3, 126.5, 126.2, 124.8 (d, *J* = 15.1 Hz), 124.7 (d, *J* = 13.9 Hz), 123.5, 123.4, 116.0 (t, *J* = 258.3 Hz), 116.0 (t, *J* = 254.5 Hz), 57.0, 56.9, 56.1, 52.5, 52.2, 51.4, 50.1, 42.3, 42.2, 40.6, 39.7, 37.6, 37.3, 37.1 - 36.6 (m), 32.0, 31.9, 29.0, 27.2, 27.1, 25.5, 24.5, 21.4, 21.2, 21.1, 19.4, 19.1, 12.4, 12.2. <sup>31</sup>P NMR (202 MHz, CDCl<sub>3</sub>) δ 33.1, 32.9. <sup>19</sup>F NMR (471 MHz, CDCl<sub>3</sub>) δ -104.0, -104.6, -104.8 -105.3. HRMS (ESI) *m/z*: [M+H]<sup>+</sup> calcd for C<sub>64</sub>H<sub>76</sub>F<sub>2</sub>O<sub>5</sub>P<sup>+</sup> 993.5393; found 993.5395.



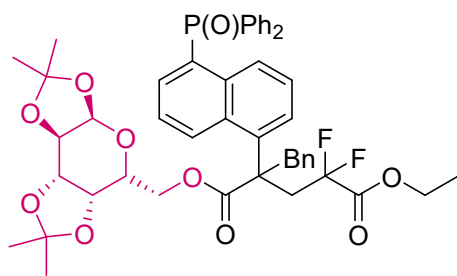

5-ethyl-1-(((3aR,5R,5aS,8aS,8bR)-2,2,7,7-tetramethyltetrahydro-5H-bis([1,3]dioxolo)[4,5-b:4',5'-d]pyran-5-yl)methyl)-2-benzyl-2-(5-(diphenylphosphoryl)naphthalen-1-yl)-4,4-difluoropentanedioate (**7g**)

The general procedure was applied to **1a** (31.2 mg, 0.1 mmol, 1 equiv), **2n** (121.2 mg, 0.3 mmol, 3.0 equiv), **3a** (60.9 mg, 0.3 mmol, 3.0 equiv), [RuCl<sub>2</sub>(*p*-cymene)]<sub>2</sub> (3.0 mg, 5.0 mol%), NaOAc (16.4 mg, 2.0 equiv) in PhCF<sub>3</sub> (1.0 mL) was stirred at 80 °C in heating mantle for 12 h under an atmosphere of argon. At ambient temperature, EtOAc (15 mL) was added, and the mixture was filtered through a short pad of silica gel. The solvent was removed in vacuo and the residue was purified by preparative chromatography (*R<sub>f</sub>* = 0.5, PE/DCM/EA = 10/1/1) afforded the product, the product was oxidized by adding 1mL H<sub>2</sub>O<sub>2</sub>, then DCM (10mL) and H<sub>2</sub>O (10mL) were added for liquid separation to remove the water phase, The solvent was removed in vacuo and the residue was purified by preparative chromatography (*R<sub>f</sub>* = 0.5, PE/DCM/EA = 1/1/1) afforded the product **7g** (dr = 1:1) (73 mg, 85 % yield), <sup>1</sup>H NMR (400 MHz, CDCl<sub>3</sub>) δ 8.72 - 8.68 (m, 1H), 8.14 - 8.09 (m, 1H), 7.73 - 7.61 (m, 5H), 7.59 - 7.53 (m, 2H), 7.50 - 7.39 (m, 6H), 7.35 - 7.26 (m, 4H), 7.24 - 7.08 (m, 2H), 5.44 (dd, *J* = 36.0, 4.8 Hz, 1H), 4.52 - 4.09 (m, 3H), 4.13 - 3.87 (m, 2H), 3.79 - 3.15 (m, 6H), 2.97 (qd, *J* = 15.2, 4.8 Hz, 1H), 1.41 - 1.40 (m, 3H), 1.36 - 1.28 (m, 6H), 1.24 - 1.23 (m, 3H), 0.96 - 0.91 (m, 3H). <sup>13</sup>C NMR (126 MHz, CDCl<sub>3</sub>) δ 174.5, 163.0 (d, *J* = 32.8 Hz), 162.9 (d, *J* = 32.8 Hz), 136.5, 136.4, 135.8, 135.7, 134.8, 134.7, 133.4 - 133.2 (m), 132.6 - 132.4 (m), 132.2, 132.1, 131.0, 130.3 (d, *J* = 102.1 Hz), 130.2, 128.8 - 128.5 (m), 128.4, 127.3, 126.6, 124.9, 124.8, 116.1 (dd, *J* = 257.0, 247.0 Hz), 109.7, 109.4, 108.9, 108.8, 96.2, 96.1, 71.1, 70.7, 70.6, 70.4, 70.2, 66.2, 64.7, 64.6, 63.2, 62.7, 62.6, 52.3, 42.3 (d, *J* = 29.0 Hz), 36.6 - 36.2 (m), 26.1, 26.0, 25.1, 25.0, 24.5, 24.4, 13.5. <sup>31</sup>P NMR (202 MHz, CDCl<sub>3</sub>) δ 32.5, 32.4. <sup>19</sup>F NMR (471 MHz, CDCl<sub>3</sub>) δ -105.3 - 106.4 (m). HRMS (ESI) *m/z*: [M+H]<sup>+</sup> calcd for C<sub>48</sub>H<sub>50</sub>F<sub>2</sub>O<sub>10</sub>P<sup>+</sup> 855.3104; found 855.3089.

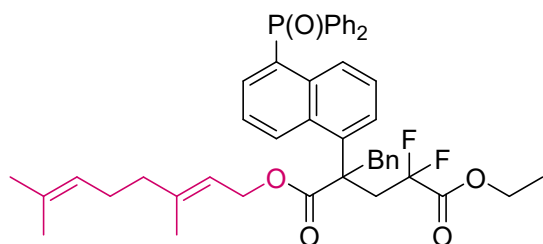

(E)-1-(3,7-dimethylocta-2,6-dien-1-yl)-5-ethyl-2-benzyl-2-(5-(diphenylphosphoryl)naphthalen-1-yl)-4,4-difluoropentanedioate (**7h**)

The general procedure was applied to **1a** (31.2 mg, 0.1 mmol, 1 equiv), **2o** (89.4 mg, 0.3 mmol, 3.0 equiv), **3a** (60.9 mg, 0.3 mmol, 3.0 equiv), [RuCl<sub>2</sub>(*p*-cymene)]<sub>2</sub> (3.0 mg, 5.0 mol%), NaOAc (16.4 mg, 2.0 equiv) in PhCF<sub>3</sub> (1.0 mL) was stirred at 80 °C in heating mantle for 12 h under an atmosphere of argon. At ambient temperature, EtOAc (15 mL) was added, and the mixture was filtered through a short pad of silica gel. The solvent was removed in vacuo and the residue was purified by preparative chromatography (*R<sub>f</sub>* = 0.5, PE/DCM/EA = 10/1/1) afforded the product, the product was oxidized by adding 1mL H<sub>2</sub>O<sub>2</sub>, then DCM (10mL) and H<sub>2</sub>O (10mL) were added for liquid separation to remove the water phase, The solvent was removed in vacuo and the residue was purified by preparative chromatography (*R<sub>f</sub>* = 0.5, PE/DCM/EA = 1/1/1) afforded the product **7h** (dr = 1:1) (47 mg, 63 % yield), **<sup>1</sup>H NMR** (400 MHz, CDCl<sub>3</sub>) δ 8.70 (d, *J* = 8.4 Hz, 1H), 8.10 (d, *J* = 8.4 Hz, 1H), 7.71 - 7.64 (m, 5H), 7.59 - 7.53 (m, 2H), 7.50 - 7.40 (m, 5H), 7.39 - 7.26 (m, 5H), 7.17 - 7.03 (m, 2H), 5.08 - 5.00 (m, 2H), 4.60 (dd, *J* = 12.0, 7.4 Hz, 1H), 4.39 (dd, *J* = 12.0, 7.2 Hz, 1H), 4.02 (d, *J* = 12.8 Hz, 1H), 3.54 (d, *J* = 12.8 Hz, 1H), 3.50 - 3.12 (m, 3H), 3.02 - 2.91 (m, 1H), 2.02 - 1.97 (m, 2H), 1.94 - 1.88 (m, 2H), 1.65 (s, 3H), 1.54 (s, 3H), 1.49 (s, 3H), 0.94 (t, *J* = 7.2 Hz, 3H). **<sup>13</sup>C NMR** (126 MHz, CDCl<sub>3</sub>) δ 174.8, 163.0 (t, *J* = 32.8 Hz), 143.0, 136.8, 135.8, 134.7 (d, *J* = 8.8 Hz), 133.3, 133.2, 133.1, 132.6, 132.5, 132.4, 132.2, 132.1, 131.9, 131.0, 130.4 (d, *J* = 102.1 Hz), 128.8, 128.7, 128.4 (d, *J* = 6.3 Hz), 128.3, 127.3, 126.5, 124.4 (d, *J* = 13.9 Hz), 123.7, 117.4, 116.1 (dd, *J* = 258.3, 248.2 Hz), 62.7, 62.4, 52.1 (d, *J* = 5.0 Hz), 42.2, 39.5, 36.7 (t, *J* = 21.4 Hz), 26.2, 25.8, 17.8, 16.4, 13.5. **<sup>31</sup>P NMR** (202 MHz, CDCl<sub>3</sub>) δ 32.7. **<sup>19</sup>F NMR** (471 MHz, CDCl<sub>3</sub>) δ -105.5, -106.1. **HRMS** (ESI) *m/z*: [M+H]<sup>+</sup> calcd for C<sub>46</sub>H<sub>48</sub>F<sub>2</sub>O<sub>5</sub>P<sup>+</sup> 749.3202; found 749.3185.

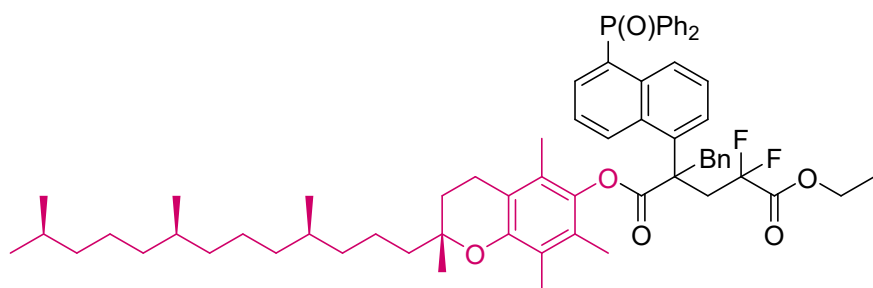

5-ethyl-1-((R)-2,5,7,8-tetramethyl-2-((4R,8R)-4,8,12-trimethyltridecyl)chroman-6-yl)-2-(5-(diphenylphosphoryl)naphthalen-1-yl)-4,4-difluoro-2-methylpentanedioate (**7i**)

The general procedure was applied to **1a** (31.2 mg, 0.1 mmol, 1 equiv), **2p** (172.2 mg, 0.3 mmol, 3.0 equiv), **3a** (60.9 mg, 0.3 mmol, 3.0 equiv), [RuCl<sub>2</sub>(*p*-cymene)]<sub>2</sub> (3.0 mg, 5.0 mol%), NaOAc (16.4 mg, 2.0 equiv) in PhCF<sub>3</sub> (1.0 mL) was stirred at 80 °C in heating mantle for 12 h under an atmosphere of argon. At ambient temperature, EtOAc (15 mL) was added, and the mixture was filtered through a short pad of silica gel. The solvent was removed in vacuo and the residue was purified by preparative chromatography (*R<sub>f</sub>* = 0.5, PE/DCM/EA = 10/1/1) afforded the product, the product was oxidized by adding 1mL H<sub>2</sub>O<sub>2</sub>, then DCM (10mL) and H<sub>2</sub>O (10mL) were added for liquid separation to remove the water phase, The solvent was removed in vacuo and the residue was purified by preparative

chromatography ( $R_f = 0.5$ , PE/DCM/EA = 1/1/1) afforded the product **7i** (dr > 20:1) (45 mg, 47 % yield), **<sup>1</sup>H NMR** (400 MHz, CDCl<sub>3</sub>)  $\delta$  8.78 (d,  $J = 8.4$  Hz, 1H), 8.68 (d,  $J = 8.8$  Hz, 1H), 7.80 (d,  $J = 7.6$  Hz, 1H), 7.72 - 7.65 (m, 4H), 7.60 - 7.54 (m, 2H), 7.51 - 7.39 (m, 6H), 7.34 (dd,  $J = 15.2, 6.4$  Hz, 1H), 7.23 - 7.16 (m, 3H), 7.14 - 7.04 (m, 2H), 4.24 (d,  $J = 14.2$  Hz, 1H), 4.02 (d,  $J = 14.2$  Hz, 1H), 3.74 - 3.47 (m, 3H), 3.39 - 3.28 (m, 1H), 2.47 (t,  $J = 6.8$  Hz, 2H), 2.08 - 1.93 (m, 4H), 1.80 - 1.69 (m, 2H), 1.58 - 1.49 (m, 8H), 1.47 - 1.32 (m, 5H), 1.32 - 1.23 (m, 7H), 1.20 (s, 3H), 1.16 - 1.03 (m, 9H), 0.90 - 0.84 (m, 12H). **<sup>13</sup>C NMR** (126 MHz, CDCl<sub>3</sub>)  $\delta$  172.2, 163.4 (t,  $J = 32.8$  Hz), 149.6, 140.7, 136.2, 135.9, 135.2 (d,  $J = 7.6$  Hz), 133.5 (d,  $J = 11.3$  Hz), 133.1 (d,  $J = 3.8$  Hz), 132.9 (d,  $J = 8.8$  Hz), 132.4 - 132.0 (m), 131.3, 130.3 (d,  $J = 102.1$  Hz), 130.3, 128.9 (d,  $J = 6.3$  Hz), 128.8, 128.7, 128.4, 127.3, 127.1, 126.8, 126.7, 125.6, 124.5 (d,  $J = 13.9$  Hz), 123.2, 117.6, 115.9 (dd,  $J = 257.0, 250.7$  Hz), 75.2, 75.1, 62.9, 58.3, 52.8 (d,  $J = 2.5$  Hz), 41.7, 40.1 (d,  $J = 6.3$  Hz), 39.5, 37.9 - 37.4 (m), 32.9, 32.8, 31.2 (d,  $J = 3.8$  Hz), 29.8, 28.1, 24.9, 24.5, 24.0, 22.8, 22.7, 21.1, 20.7, 19.9, 19.8, 19.7, 18.4, 13.8, 13.7, 13.0, 11.9. **<sup>31</sup>P NMR** (202 MHz, CDCl<sub>3</sub>)  $\delta$  32.8. **<sup>19</sup>F NMR** (471 MHz, CDCl<sub>3</sub>)  $\delta$  -95.5, -96.0, -102.6, -103.2. **HRMS** (ESI)  $m/z$ : [M+H]<sup>+</sup> calcd for C<sub>59</sub>H<sub>76</sub>F<sub>2</sub>O<sub>6</sub>P<sup>+</sup> 949.5342; found 949.5360.

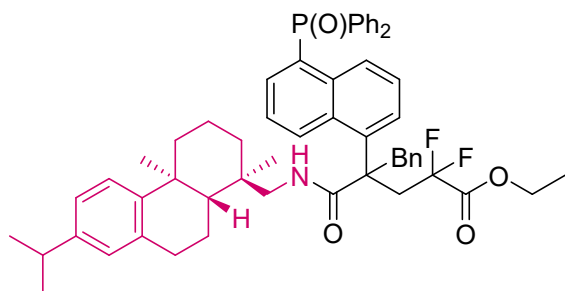

Ethyl-4-benzyl-4-(5-(diphenylphosphoryl)naphthalen-1-yl)-2,2-difluoro-5-((((1R,4aS,10aR)-7-isopropyl-1,4a-dimethyl-1,2,3,4,4a,9,10,10a-octahydrophenanthren-1-yl)methyl)amino)-5-oxopentanoate (dr = 1:1) (**7j** + **7j'**)

The general procedure was applied to **1a** (31.2 mg, 0.1 mmol, 1 equiv), **2q** (128.7 mg, 0.3 mmol, 3.0 equiv), **3a** (60.9 mg, 0.3 mmol, 3.0 equiv), [RuCl<sub>2</sub>(*p*-cymene)]<sub>2</sub> (3.0 mg, 5.0 mol%), NaOAc (16.4 mg, 2.0 equiv) in PhCF<sub>3</sub> (1.0 mL) was stirred at 80 °C in heating mantle for 12 h under an atmosphere of argon. At ambient temperature, EtOAc (15 mL) was added, and the mixture was filtered through a short pad of silica gel. The solvent was removed in vacuo and the residue was purified by preparative chromatography ( $R_f = 0.5$ , PE/DCM/EA = 8/1/1) afforded the product, the product was oxidized by adding 1mL H<sub>2</sub>O<sub>2</sub>, then DCM (10mL) and H<sub>2</sub>O (10mL) were added for liquid separation to remove the water phase, The solvent was removed in vacuo and the residue was purified by preparative chromatography ( $R_f = 0.3$ , PE/DCM/EA = 1/1/1) afforded the product **7j** (20 mg, 25 % yield), **<sup>1</sup>H NMR** (400 MHz, CDCl<sub>3</sub>)  $\delta$  8.75 (d,  $J = 6.8$  Hz, 1H), 8.22 (d,  $J = 8.8$  Hz, 1H), 7.67 - 7.35 (m, 12H), 7.26 - 6.19 (m, 10H), 5.22 (s, 1H), 4.25 - 2.66 (m, 10H), 2.16 - 1.90 (m, 3H), 1.73 - 1.39 (m, 3H), 1.27 - 1.09 (m, 15H), 0.77 - 0.44 (m, 4H). **<sup>13</sup>C NMR** (126 MHz, CDCl<sub>3</sub>)  $\delta$  175.1, 163.7 (t,  $J = 37.8$  Hz), 147.1, 145.9,

136.5, 136.1, 135.0, 133.9, 133.8, 133.4, 133.1, 132.6, 132.3, 132.2, 132.1, 132.1, 132.0, 130.8, 129.9, 129.1 (d,  $J = 6.3$  Hz), 128.8, 128.7, 128.0, 127.1, 127.0, 126.2, 125.1, 125.0, 124.0, 123.7, 116.3 (t,  $J = 247.0$  Hz), 63.0, 52.9, 38.2, 37.23, 36.0 33.5, 30.0, 29.8, 25.3, 24.1, 19.1, 18.4, 13.8.  $^{31}\text{P}$  NMR (202 MHz,  $\text{CDCl}_3$ )  $\delta$  32.9.  $^{19}\text{F}$  NMR (471 MHz,  $\text{CDCl}_3$ )  $\delta$  -95.5, -96.1, -100.1, -100.5, -102.8, -105.0, -105.5. **HRMS** (ESI)  $m/z$ :  $[\text{M}+\text{H}]^+$  calcd for  $\text{C}_{56}\text{H}_{61}\text{F}_2\text{NO}_4\text{P}^+$  880.4301; found 880.4299.

The general procedure was applied to **1a** (31.2 mg, 0.1 mmol, 1 equiv), **2q** (128.7 mg, 0.3 mmol, 3.0 equiv), **3a** (60.9 mg, 0.3 mmol, 3.0 equiv),  $[\text{RuCl}_2(p\text{-cymene})]_2$  (3.0 mg, 5.0 mol%), NaOAc (16.4 mg, 2.0 equiv) in  $\text{PhCF}_3$  (1.0 mL) was stirred at 80 °C in heating mantle for 12 h under an atmosphere of argon. At ambient temperature, EtOAc (15 mL) was added, and the mixture was filtered through a short pad of silica gel. The solvent was removed in vacuo and the residue was purified by preparative chromatography ( $R_f = 0.5$ , PE/DCM/EA = 8/1/1) afforded the product, the product was oxidized by adding 1mL  $\text{H}_2\text{O}_2$ , then DCM (10mL) and  $\text{H}_2\text{O}$  (10mL) were added for liquid separation to remove the water phase, The solvent was removed in vacuo and the residue was purified by preparative chromatography ( $R_f = 0.3$ , PE/DCM/EA = 1/1/1) afforded the product **7j'** (20 mg, 25 % yield),  $^1\text{H}$  NMR (400 MHz,  $\text{CDCl}_3$ )  $\delta$  8.72 (d,  $J = 8.6$  Hz, 1H), 8.01 - 7.26 (m, 17H), 7.24 - 7.03 (m, 2H), 6.93 - 6.88 (m, 1H), 6.88 - 6.47 (m, 3H), 5.80 (s, 1H), 5.25 (dd,  $J = 8.8, 4.0$  Hz, 1H), 4.16 - 3.72 (m, 2H), 3.52 - 3.06 (m, 4H), 3.01 - 2.83 (m, 3H), 2.80 - 2.73 (m, 1H), 2.40 - 2.12 (m, 1H), 2.04 - 1.95 (m, 2H), 1.64 - 1.45 (m, 2H), 1.30 - 1.25 (m, 1H), 1.15 - 1.10 (m, 6H), 1.06 (s, 3H), 0.95 - 0.84 (m, 5H), 0.76 (s, 3H), 0.22 - 0.12 (m, 1H).  $^{13}\text{C}$  NMR (126 MHz,  $\text{CDCl}_3$ )  $\delta$  175.1, 163.7 (t,  $J = 37.8$  Hz), 147.1, 145.9, 136.5, 136.1, 135.0, 133.9, 133.8, 133.4, 133.1, 132.6, 132.3, 132.2, 132.1, 132.1, 132.0, 130.8, 129.9, 129.1 (d,  $J = 6.3$  Hz), 128.8, 128.7, 128.0, 127.1, 127.0, 126.2, 125.1, 125.0, 124.0, 123.7, 116.3 (t,  $J = 247.0$  Hz), 63.0, 52.9, 38.2, 37.23, 36.0 33.5, 30.0, 29.8, 25.3, 24.1, 19.1, 18.4, 13.8. 174.6, 163.3 (t,  $J = 31.5$  Hz), 147.2, 146.0, 136.1, 135.9, 135.5, 134.6, 134.1, 133.8, 133.1, 132.9, 132.5 - 132.4 (m), 132.2, 132.1, 131.0, 129.4, 129.2, 128.8, 128.7, 128.6, 128.4, 127.5, 127.0, 126.3, 125.3 (d,  $J = 12.6$  Hz), 124.0, 123.5, 62.6, 52.9, 49.9, 44.0, 42.2, 37.9, 37.8, 37.0, 35.8, 33.6, 30.0, 29.8, 25.5, 24.2, 24.0, 19.1, 18.2, 13.6.  $^{31}\text{P}$  NMR (202 MHz,  $\text{CDCl}_3$ )  $\delta$  32.5.  $^{19}\text{F}$  NMR (471 MHz,  $\text{CDCl}_3$ )  $\delta$  -95.2 (d,  $J = 263.8$  Hz), -105.4 (d,  $J = 263.8$  Hz). **HRMS** (ESI)  $m/z$ :  $[\text{M}+\text{H}]^+$  calcd for  $\text{C}_{56}\text{H}_{61}\text{F}_2\text{NO}_4\text{P}^+$  880.4301; found 880.4297.

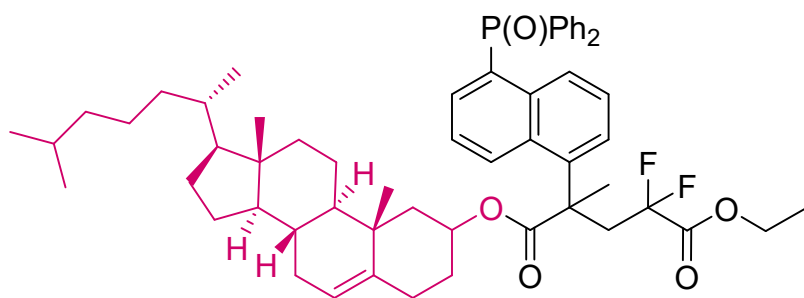

1-((8R,9R,10S,13S,14R,17S)-10,13-dimethyl-17-((S)-6-methylheptan-2-yl)-2,3,4,7,8,9,10,11,12,13,14,15,16,17-tetradecahydro-1H-cyclopenta[a]phenanthren-2-yl)-5-ethyl-2-(5-(diphenylphosphoryl)naphthalen-1-yl)-4,4-difluoro-2-methylpentanedioate (**7k**)

The general procedure was applied to **1a** (31.2 mg, 0.1 mmol, 1 equiv), **2r** (136.2 mg, 0.3 mmol, 3.0 equiv), **3a** (60.9 mg, 0.3 mmol, 3.0 equiv), [RuCl<sub>2</sub>(*p*-cymene)]<sub>2</sub> (3.0 mg, 5.0 mol%), NaOAc (16.4 mg, 2.0 equiv) in PhCF<sub>3</sub> (1.0 mL) was stirred at 80 °C in heating mantle for 12 h under an atmosphere of argon. At ambient temperature, EtOAc (15 mL) was added, and the mixture was filtered through a short pad of silica gel. The solvent was removed in vacuo and the residue was purified by preparative chromatography (*R*<sub>f</sub> = 0.5, PE/DCM/EA = 10/1/1) afforded the product, the product was oxidized by adding 1mL H<sub>2</sub>O<sub>2</sub>, then DCM (10mL) and H<sub>2</sub>O (10mL) were added for liquid separation to remove the water phase, The solvent was removed in vacuo and the residue was purified by preparative chromatography (*R*<sub>f</sub> = 0.5, PE/DCM/EA = 1/1/1) afforded the product **7k** (dr = 1:1) (59 mg, 65 % yield), <sup>1</sup>H NMR (400 MHz, CDCl<sub>3</sub>) δ 8.69 (dd, *J* = 8.4, 3.6 Hz, 1H), 8.09 - 7.94 (m, 1H), 7.71 - 7.61 (m, 4H), 7.58 - 7.51 (m, 3H), 7.49 - 7.35 (m, 6H), 7.27 (dd, *J* = 9.2, 6.4 Hz, 1H), 5.36 - 5.20 (m, 1H), 4.73 - 4.47 (m, 1H), 3.58 - 3.48 (m, 1H), 3.35 - 3.04 (m, 3H), 2.19 - 1.66 (m, 11H), 1.60 - 1.31 (m, 10H), 1.24 - 0.93 (m, 11H), 0.92 - 0.85 (m, 14H), 0.64 (s, 3H). <sup>13</sup>C NMR (126 MHz, CDCl<sub>3</sub>) δ 176.6, 163.2 (d, *J* = 37.8 Hz), 139.5, 137.0, 134.8 (d, *J* = 8.8 Hz), 133.2, 133.0 (d, *J* = 104.6 Hz), 133.0 (d, *J* = 104.6 Hz), 132.3 - 132.0133.0 (m), 130.9, 130.0, 128.8, 128.7, 128.3, 126.5, 126.2, 124.3 (d, *J* = 15.1 Hz), 122.9, 122.8, 115.9 (dd, *J* = 255.8, 248.2 Hz), 75.5, 75.4, 62.6, 56.8, 56.3, 50.1, 47.6 (d, *J* = 7.6 Hz), 42.4, 41.4 (t, *J* = 21.4 Hz), 39.8, 39.6, 37.7, 37.5, 36.6, 36.3, 35.9, 32.0, 31.9, 28.3, 28.1, 27.4, 27.1, 25.3, 24.4, 23.9, 22.9, 22.7, 21.1, 19.4, 18.8, 13.6, 11.9. <sup>31</sup>P NMR (202 MHz, CDCl<sub>3</sub>) δ 32.9. <sup>19</sup>F NMR (471 MHz, CDCl<sub>3</sub>) δ -93.8, -94.3, -103.0, -103.0, -103.6, -103.6. HRMS (ESI) *m/z*: [M+H]<sup>+</sup> calcd for C<sub>57</sub>H<sub>72</sub>F<sub>2</sub>O<sub>5</sub>P<sup>+</sup> 905.5080; found 905.5065.

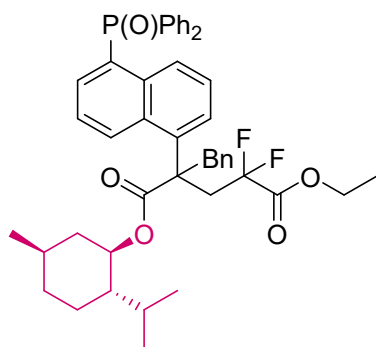

5-ethyl-1-((1R,2S,5R)-2-isopropyl-5-methylcyclohexyl)-2-benzyl-2-(5-(diphenylphosphoryl)naphthalen-1-yl)-4,4-difluoropentanedioate (**7l**)

The general procedure was applied to **1a** (31.2 mg, 0.1 mmol, 1 equiv), **2s** (90.0 mg, 0.3 mmol, 3.0 equiv), **3a** (60.9 mg, 0.3 mmol, 3.0 equiv), [RuCl<sub>2</sub>(*p*-cymene)]<sub>2</sub> (3.0 mg, 5.0 mol%), NaOAc (16.4 mg, 2.0 equiv) in PhCF<sub>3</sub> (1.0 mL) was stirred at 80 °C in heating mantle for 12 h under an atmosphere of argon. At

ambient temperature, EtOAc (15 mL) was added, and the mixture was filtered through a short pad of silica gel. The solvent was removed in vacuo and the residue was purified by preparative chromatography ( $R_f = 0.5$ , PE/DCM/EA = 10/1/1) afforded the product, the product was oxidized by adding 1 mL  $H_2O_2$ , then DCM (10 mL) and  $H_2O$  (10 mL) were added for liquid separation to remove the water phase, The solvent was removed in vacuo and the residue was purified by preparative chromatography ( $R_f = 0.5$ , PE/DCM/EA = 1/1/1) afforded the product **7l** (dr = 1:1) (50 mg, 67 % yield),  $^1H$  NMR (400 MHz,  $CDCl_3$ )  $\delta$  8.49 (dd,  $J = 20.0$ , 8.4 Hz, 2H), 8.12 - 8.08 (m, 2H), 7.53 - 7.44 (m, 8H), 7.41 - 6.72 (m, 30H), 4.39 - 4.20 (m, 2H), 3.81 (t,  $J = 12.4$  Hz, 2H), 3.56 - 2.64 (m, 10H), 2.04 - 1.99 (m, 2H), 1.80 - 1.74 (m, 1H), 1.50 - 1.10 (m, 7H), 0.94 - -0.02 (m, 32H).  $^{13}C$  NMR (126 MHz,  $CDCl_3$ )  $\delta$  174.5, 174.4, 163.3 (d,  $J = 31.5$  Hz), 163.2 (d,  $J = 32.8$  Hz), 137.0, 136.9, 135.9, 135.8, 134.9 (d,  $J = 7.6$  Hz), 134.8 (d,  $J = 7.6$  Hz), 133.5 (d,  $J = 5.0$  Hz), 133.3 - 133.2 (m), 132.7 - 132.4 (m), 132.3, 132.2, 132.1, 132.0, 131.2, 131.1, 130.5 (d,  $J = 97.0$  Hz), 130.4 (d,  $J = 102.1$  Hz), 129.4, 129.3, 128.8, 128.7, 128.4, 128.3, 128.2, 127.2, 127.1, 126.5, 126.3, 126.1, 124.5 (d,  $J = 11.3$  Hz), 124.3 (d,  $J = 13.9$  Hz), 116.1 (dd,  $J = 252.0$ , 255.8 Hz), 76.7, 62.8, 52.1, 46.8, 46.7, 41.7, 41.6, 40.8, 39.6, 37.3 - 36.6 (m), 34.0, 33.9, 31.4, 31.2, 25.4, 24.7, 22.8, 22.7, 22.1, 22.0, 21.1, 21.0, 15.9, 13.6.  $^{31}P$  NMR (202 MHz,  $CDCl_3$ )  $\delta$  32.9, 32.4.  $^{19}F$  NMR (471 MHz,  $CDCl_3$ )  $\delta$  -105.3, -105.9. HRMS (ESI)  $m/z$ :  $[M+H]^+$  calcd for  $C_{46}H_{50}F_2O_5P^+$  751.3358; found 751.3354.

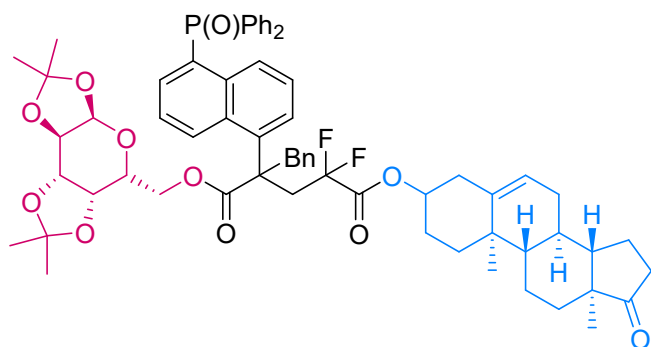

5-((8R,9S,10R,13S,14S)-10,13-dimethyl-17-oxo-2,3,4,7,8,9,10,11,12,13,14,15,16,17-tetradecahydro-1H-cyclopenta[a]phenanthren-3-yl)-1-(((3aR,5R,5aS,8aS,8bR)-2,2,7,7-tetramethyltetrahydro-5H-bis([1,3]dioxolo)[4,5-b:4',5'-d]pyran-5-yl)methyl)-2-benzyl-2-(5-(diphenylphosphoryl)naphthalen-1-yl)-4,4-difluoropentanedioate (**7m**)

The general procedure was applied to **1a** (31.2 mg, 0.1 mmol, 1 equiv), **2n** (121.2 mg, 0.3 mmol, 3.0 equiv), **3v** (133.5 mg, 0.3 mmol, 3.0 equiv),  $[RuCl_2(p\text{-cymene})]_2$  (3.0 mg, 5.0 mol%), NaOAc (16.4 mg, 2.0 equiv) in  $PhCF_3$  (1.0 mL) was stirred at 80 °C in heating mantle for 12 h under an atmosphere of argon. At ambient temperature, EtOAc (15 mL) was added, and the mixture was filtered through a short pad of silica gel. The solvent was removed in vacuo and the residue was purified by preparative chromatography ( $R_f = 0.5$ , PE/DCM/EA = 10/1/1) afforded the product, the product was oxidized by adding 1 mL  $H_2O_2$ , then DCM (10 mL) and  $H_2O$  (10 mL) were added for liquid separation to remove the water phase, The solvent was removed in vacuo and the residue was purified by preparative

chromatography ( $R_f = 0.5$ , PE/DCM/EA = 1/1/1) afforded the product **7m** (55 mg, 50 % yield),  $^1\text{H NMR}$  (400 MHz,  $\text{CDCl}_3$ )  $\delta$  8.68 (dd,  $J = 8.4, 4.0$  Hz, 2H), 8.14 (d,  $J = 8.8$  Hz, 2H), 7.68 - 7.52 (m, 14H), 7.49 - 7.38 (m, 12H), 7.32 - 7.23 (m, 8H), 7.14 - 7.05 (m, 4H), 5.44 (dd,  $J = 28.8, 4.8$  Hz, 2H), 5.37 (d,  $J = 3.6$  Hz, 2H), 4.51 - 4.40 (m, 3H), 4.29 - 4.08 (m, 7H), 4.04 (dd,  $J = 12.8, 4.8$  Hz, 2H), 3.89 - 3.68 (m, 4H), 3.61 - 3.54 (m, 3H), 3.21 - 2.89 (m, 4H), 2.52 - 2.43 (m, 2H), 2.28 - 2.03 (m, 11H), 2.00 - 1.93 (m, 2H), 1.90 - 1.75 (m, 5H), 1.70 - 1.60 (m, 6H), 1.58 - 1.45 (m, 5H), 1.41 (d,  $J = 1.2$  Hz, 6H), 1.36 - 1.23 (m, 20H), 1.04 - 0.99 (m, 10H), 0.89 (s, 6H).  $^{13}\text{C NMR}$  (126 MHz,  $\text{CDCl}_3$ )  $\delta$  174.6, 162.7 (d,  $J = 32.8$  Hz), 162.6 (d,  $J = 32.8$  Hz), 139.2, 139.1, 137.0, 136.9, 135.9, 135.8, 134.9 (d,  $J = 7.6$  Hz), 134.8 (d,  $J = 8.8$  Hz), 133.5, 133.4 (d,  $J = 3.8$  Hz), 133.2 (d,  $J = 6.3$  Hz), 133.1 (d,  $J = 6.3$  Hz), 132.6, 132.5 (d,  $J = 3.8$  Hz), 132.4 - 132.0 (m), 131.0, 130.5 (d,  $J = 102.1$  Hz), 130.4 (d,  $J = 102.1$  Hz), 128.8, 128.7, 128.6, 128.5 - 128.4 (m), 128.3, 127.2, 126.4, 126.3, 126.2, 124.9, 124.8, 122.6, 116.0 (t,  $J = 254.5$  Hz), 115.9 (t,  $J = 254.5$  Hz), 109.7, 109.4, 108.9, 108.8, 96.1, 96.0, 76.8, 71.0, 70.7, 70.6, 70.4, 70.2, 66.1, 64.7, 64.6, 63.3, 52.3, 51.8, 50.1, 47.6, 42.4 - 42.1 (m), 37.4, 37.2, 36.7, 36.6, 35.9, 31.5, 30.8, 27.1, 26.9, 26.1, 26.0, 25.1, 25.0, 24.5, 24.4, 21.9, 20.4, 19.3, 13.6.  $^{31}\text{P NMR}$  (202 MHz,  $\text{CDCl}_3$ )  $\delta$  32.6.  $^{19}\text{F NMR}$  (471 MHz,  $\text{CDCl}_3$ )  $\delta$  -104.1, -104.6. **HRMS** (ESI)  $m/z$ :  $[\text{M}+\text{H}]^+$  calcd for  $\text{C}_{65}\text{H}_{72}\text{F}_2\text{O}_{11}\text{P}^+$  1097.4775; found 1097.4775.

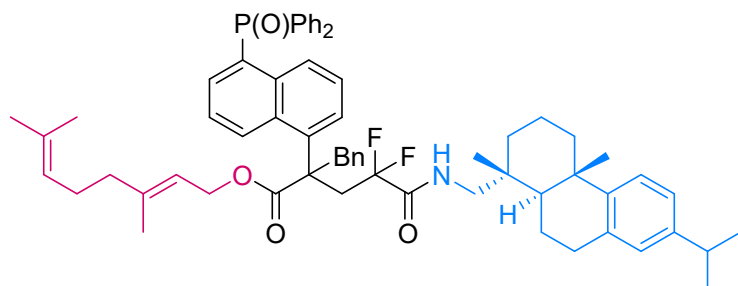

(E)-3,7-dimethylocta-2,6-dien-1-yl-2-benzyl-2-(5-(diphenylphosphoryl)naphthalen-1-yl)-4,4-difluoro-5-((((1R,4aS,10aR)-7-isopropyl-1,4a-dimethyl-1,2,3,4,4a,9,10,10a-octahydrophenanthren-1-yl)methyl)amino)-5-oxopentanoate (**7n**)

The general procedure was applied to **1a** (31.2 mg, 0.1 mmol, 1 equiv), **2o** (89.4 mg, 0.3 mmol, 3.0 equiv), **3s** (132.6 mg, 0.3 mmol, 3.0 equiv),  $[\text{RuCl}_2(p\text{-cymene})]_2$  (3.0 mg, 5.0 mol%), NaOAc (16.4 mg, 2.0 equiv) in  $\text{PhCF}_3$  (1.0 mL) was stirred at 80 °C in heating mantle for 12 h under an atmosphere of argon. At ambient temperature, EtOAc (15 mL) was added, and the mixture was filtered through a short pad of silica gel. The solvent was removed in vacuo and the residue was purified by preparative chromatography ( $R_f = 0.5$ , PE/DCM/EA = 8/1/1) afforded the product, the product was oxidized by adding 1mL  $\text{H}_2\text{O}_2$ , then DCM (10mL) and  $\text{H}_2\text{O}$  (10mL) were added for liquid separation to remove the water phase, The solvent was removed in vacuo and the residue was purified by preparative chromatography ( $R_f = 0.3$ , PE/DCM/EA = 1/1/1) afforded the product **7n** (dr = 1:1) (35 mg, 36 % yield),  $^1\text{H NMR}$  (400 MHz,  $\text{CDCl}_3$ )  $\delta$  8.71 (dd,  $J = 8.4, 4.8$  Hz, 1H), 8.15 - 8.05 (m, 1H), 7.68 - 7.62 (m, 4H), 7.59 - 7.42 (m, 7H), 7.36 - 7.27 (m, 2H), 7.25 - 7.12 (m, 5H), 7.04 - 6.89 (m, 3H), 6.86 (dd,  $J = 22.0, 1.2$  Hz, 1H), 5.87 (s,



1H), 5.08 - 5.00 (m, 1H), 4.61 (dd,  $J = 12.0, 7.2$  Hz, 1H), 4.40 (dd,  $J = 11.6, 7.2$  Hz, 1H), 3.88 (d,  $J = 13.2$  Hz, 1H), 3.60 (dd,  $J = 12.8, 7.6$  Hz, 1H), 3.20 - 3.06 (m, 1H), 3.05 - 2.93 (m, 2H), 2.90 - 2.63 (m, 4H), 2.26 (dd,  $J = 12.8, 2.8$  Hz, 1H), 2.01 - 1.96 (m, 2H), 1.93 - 1.88 (m, 2H), 1.81 - 1.59 (m, 9H), 1.54 (s, 3H), 1.48 (s, 3H), 1.43 - 1.23 (m, 4H), 1.23 - 1.17 (m, 9H), 1.12 - 1.04 (m, 1H), 0.87 (d,  $J = 4.4$  Hz, 3H).  $^{13}\text{C}$  NMR (126 MHz,  $\text{CDCl}_3$ )  $\delta$  175.2, 164.1 - 163.5 (m), 147.0, 145.8, 143.0, 137.8 (d,  $J = 8.8$  Hz), 135.9, 135.0 - 135.0 (m), 134.7, 134.6, 133.6, 133.4, 133.3, 133.2 - 132.4 (m), 132.3, 132.2, 132.1, 132.0, 130.9, 130.3 (d,  $J = 102.1$  Hz), 130.2 (d,  $J = 102.1$  Hz), 128.9, 128.8, 128.7, 128.4 - 128.3 (m), 128.2, 127.2, 127.0, 127.0, 126.2, 125.8, 124.5, 124.3, 124.0, 123.8, 118.2 (t,  $J = 257.0$  Hz), 117.5, 62.4, 52.1, 49.9, 46.0, 45.8, 42.3, 39.6, 38.4, 38.3, 37.6, 37.5, 37.4, 36.8 - 36.1 (m), 33.6, 30.3, 29.8, 26.3, 25.8, 25.5, 25.4, 24.1, 24.1, 19.1, 18.6, 17.8, 16.5.  $^{31}\text{P}$  NMR (202 MHz,  $\text{CDCl}_3$ )  $\delta$  33.3, 33.2.  $^{19}\text{F}$  NMR (471 MHz,  $\text{CDCl}_3$ )  $\delta$  -103.7, -104.4, -105.0. HRMS (ESI)  $m/z$ :  $[\text{M}+\text{H}]^+$  calcd for  $\text{C}_{64}\text{H}_{73}\text{F}_2\text{NO}_4\text{P}^+$  988.5240; found 988.5235.

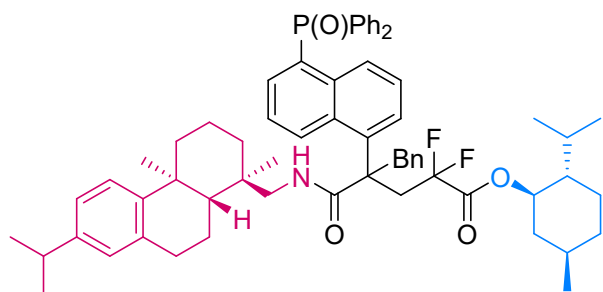

(1R,2S,5R)-2-isopropyl-5-methylcyclohexyl-4-benzyl-4-(5-(diphenylphosphoryl)naphthalen-1-yl)-2,2-difluoro-5-((((1R,4aS,10aR)-7-isopropyl-1,4a-dimethyl-1,2,3,4,4a,9,10,10a-octahydrophenanthren-1-yl)methyl)amino)-5-oxopentanoate (**7o**)

The general procedure was applied to **1a** (31.2 mg, 0.1 mmol, 1 equiv), **2q** (128.7 mg, 0.3 mmol, 3.0 equiv), **3r** (93.9 mg, 0.3 mmol, 3.0 equiv),  $[\text{RuCl}_2(p\text{-cymene})]_2$  (3.0 mg, 5.0 mol%), NaOAc (16.4 mg, 2.0 equiv) in  $\text{PhCF}_3$  (1.0 mL) was stirred at 80 °C in heating mantle for 12 h under an atmosphere of argon. At ambient temperature, EtOAc (15 mL) was added, and the mixture was filtered through a short pad of silica gel. The solvent was removed in vacuo and the residue was purified by preparative chromatography ( $R_f = 0.5$ , PE/DCM/EA = 8/1/1) afforded the product, the product was oxidized by adding 1 mL  $\text{H}_2\text{O}_2$ , then DCM (10 mL) and  $\text{H}_2\text{O}$  (10 mL) were added for liquid separation to remove the water phase, The solvent was removed in vacuo and the residue was purified by preparative chromatography ( $R_f = 0.3$ , PE/DCM/EA = 1/1/1) afforded the product **7o** (dr = 1:1) (49 mg, 50 % yield),  $^1\text{H}$  NMR (400 MHz,  $\text{CDCl}_3$ )  $\delta$  8.73 (d,  $J = 5.6$  Hz, 1H), 8.27 - 8.16 (m, 1H), 7.73 - 7.26 (m, 12H), 7.14 - 5.78 (m, 10H), 5.29 (s, 1H), 5.02 - 4.33 (m, 1H), 3.97 - 3.60 (m, 2H), 3.04 - 2.66 (m, 5H), 2.14 - 1.38 (m, 12H), 1.24 - 0.31 (m, 29H).  $^{13}\text{C}$  NMR (126 MHz,  $\text{CDCl}_3$ )  $\delta$  175.1, 175.0, 163.6 (t,  $J = 32.8$  Hz), 147.2, 145.6, 136.3, 135.0 (d,  $J = 8.8$  Hz), 133.8 (d,  $J = 8.8$  Hz), 133.5, 133.1, 132.6, 132.3, 132.2, 132.1, 132.0, 131.9, 130.7, 129.9 (d,  $J = 104.6$  Hz), 129.9, 128.9 - 128.8 (m), 128.7, 128.6, 127.8, 127.0, 126.9 - 126.8 (m), 126.2 - 125.9 (m), 125.0 (d,  $J = 13.9$  Hz), 124.9 (d,  $J = 15.1$  Hz), 123.9, 123.6, 116.2 (t,  $J = 254.5$



Hz), 77.8, 53.1, 53.0 - 50.4 (m), 46.9, 43.8 - 41.5 (m), 40.3, 38.2, 37.2, 37.1, 36.0, 34.1, 33.5, 33.0, 32.0 (d,  $J = 7.6$  Hz), 31.5, 31.4, 29.9, 29.8, 26.3, 26.2, 25.2, 24.1, 23.4, 22.0, 20.8, 19.1, 18.3, 16.2.  $^{31}\text{P}$  NMR (202 MHz,  $\text{CDCl}_3$ )  $\delta$  33.2, 33.1.  $^{19}\text{F}$  NMR (471 MHz,  $\text{CDCl}_3$ )  $\delta$  -100.6 - -104.5 (m). HRMS (ESI)  $m/z$ :  $[\text{M}+\text{H}]^+$  calcd for  $\text{C}_{64}\text{H}_{75}\text{F}_2\text{NO}_4\text{P}^+$  990.5396; found 990.5391.

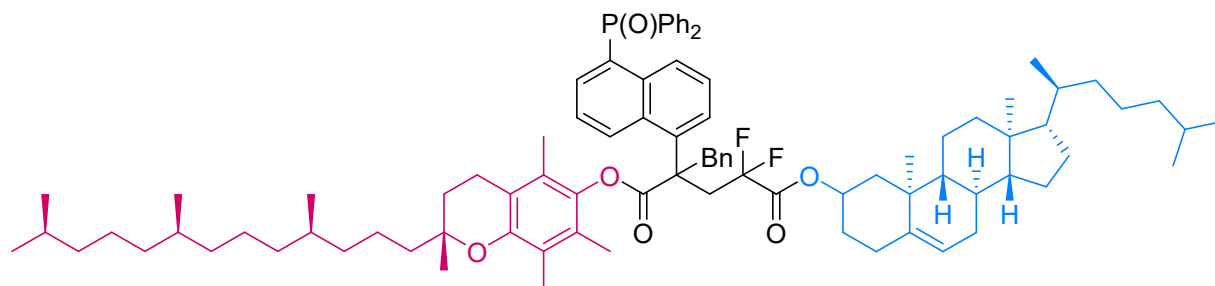

1-((8R,9R,10S,13S,14R,17S)-10,13-dimethyl-17-((S)-6-methylheptan-2-yl)-2,3,4,7,8,9,10,11,12,13,14,15,16,17-tetradecahydro-1H-cyclopenta[a]phenanthren-2-yl)-5-((R)-2,5,7,8-tetramethyl-2-((4R,8R)-4,8,12-trimethyltridecyl)chroman-6-yl)-4-(5-(diphenylphosphoryl)naphthalen-1-yl)-2,2-difluoro-4-methylpentanedioate (**7p**)

The general procedure was applied to **1a** (31.2 mg, 0.1 mmol, 1 equiv), **2p** (172.2 mg, 0.3 mmol, 3.0 equiv), **3u** (162.9 mg, 0.3 mmol, 3.0 equiv),  $[\text{RuCl}_2(p\text{-cymene})]_2$  (3.0 mg, 5.0 mol%), NaOAc (16.4 mg, 2.0 equiv) in  $\text{PhCF}_3$  (1.0 mL) was stirred at 80 °C in heating mantle for 12 h under an atmosphere of argon. At ambient temperature, EtOAc (15 mL) was added, and the mixture was filtered through a short pad of silica gel. The solvent was removed in vacuo and the residue was purified by preparative chromatography ( $R_f = 0.5$ , PE/DCM/EA = 8/1/1) afforded the product, the product was oxidized by adding 1mL  $\text{H}_2\text{O}_2$ , then DCM (10mL) and  $\text{H}_2\text{O}$  (10mL) were added for liquid separation to remove the water phase, The solvent was removed in vacuo and the residue was purified by preparative chromatography ( $R_f = 0.3$ , PE/DCM/EA = 1/1/1) afforded the product **7p** (dr = 1:1) (49 mg, 38 % yield),  $^1\text{H}$  NMR (400 MHz,  $\text{CDCl}_3$ )  $\delta$  8.76 (d,  $J = 8.4$  Hz, 1H), 8.71 (d,  $J = 8.8$  Hz, 1H), 7.74 - 7.62 (m, 5H), 7.59 - 7.54 (m, 5H), 7.50 - 7.37 (m, 6H), 7.29 (dd,  $J = 15.6, 7.2$  Hz, 1H), 7.20 - 7.12 (m, 3H), 7.04 - 6.91 (m, 2H), 5.35 (t,  $J = 5.2$  Hz, 1H), 4.42 - 4.31 (m, 1H), 4.25 (d,  $J = 14.4$  Hz, 1H), 4.00 (d,  $J = 14.0$  Hz, 1H), 3.48 - 3.27 (m, 2H), 2.46 (t,  $J = 6.4$  Hz, 2H), 2.29 - 2.12 (m, 2H), 2.04 - 1.94 (m, 5H), 1.88 - 1.65 (m, 7H), 1.53 - 1.22 (m, 27H), 1.21 - 0.97 (m, 23H), 0.94 - 0.81 (m, 23H), 0.68 (s, 3H).  $^{13}\text{C}$  NMR (126 MHz,  $\text{CDCl}_3$ )  $\delta$  172.4, 172.3, 163.2 (t,  $J = 37.8$  Hz), 163.2 (d,  $J = 31.5$  Hz), 149.6, 140.8, 139.0, 138.9, 136.7 (d,  $J = 5.0$  Hz), 136.1, 135.4 (d,  $J = 7.6$  Hz), 135.3 (d,  $J = 7.6$  Hz), 133.5, 133.4, 133.0 (d,  $J = 7.6$  Hz), 132.6 (d,  $J = 10.1$  Hz), 132.3, 132.2, 132.1, 130.5 (d,  $J = 102.1$  Hz), 130.5 (d,  $J = 102.1$  Hz), 130.3, 128.9, 128.8, 128.7, 128.3, 127.4, 127.1, 127.0, 126.8, 126.4, 125.7, 124.5 (d,  $J = 13.9$  Hz), 123.5, 123.2, 117.9, 115.9 (t,  $J = 255.8$  Hz), 115.8 (t,  $J = 255.8$  Hz), 77.3, 75.2, 56.9, 56.8, 56.3, 53.0, 50.1, 42.4, 41.5, 40.2, 39.9, 39.7, 39.5, 37.7, 37.6, 37.5, 37.4, 36.9, 36.6, 36.3, 35.9, 32.2, 32.9, 32.8, 32.1, 32.0, 31.2, 29.8, 28.4, 28.2, 28.1, 27.3, 24.9, 24.6, 24.4, 24.0, 23.0, 22.9, 22.8, 22.7, 21.2, 20.8, 19.9, 19.8 - 19.7 (m), 19.4,

18.9, 13.8, 13.0, 12.0, 11.9.  $^{31}\text{P}$  NMR (202 MHz,  $\text{CDCl}_3$ )  $\delta$  33.1.  $^{19}\text{F}$  NMR (471 MHz,  $\text{CDCl}_3$ )  $\delta$  -99.0, -101.2. HRMS (ESI)  $m/z$ :  $[\text{M}+\text{H}]^+$  calcd for  $\text{C}_{84}\text{H}_{116}\text{F}_2\text{O}_6\text{P}^+$  1289.8472; found 1289.8469.

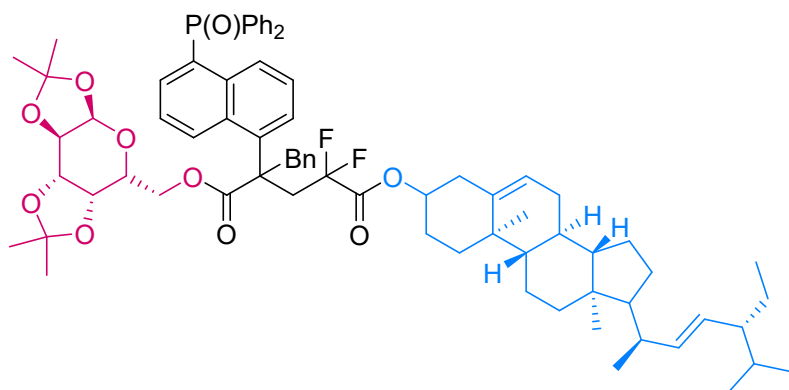

5-((8S,9S,10R,13R,14S)-17-((2R,5R,E)-5-ethyl-6-methylhept-3-en-2-yl)-10,13-dimethyl-2,3,4,7,8,9,10,11,12,13,14,15,16,17-tetradecahydro-1H-cyclopenta[a]phenanthren-3-yl)-1-(((3aR,5R,5aS,8aS,8bR)-2,2,7,7-tetramethyltetrahydro-5H-bis([1,3]dioxolo)[4,5-b:4',5'-d]pyran-5-yl)methyl)-2-benzyl-2-(5-(diphenylphosphoryl)naphthalen-1-yl)-4,4-difluoropentanedioate (**7q**)

The general procedure was applied to **1a** (31.2 mg, 0.1 mmol, 1 equiv), **2n** (121.2 mg, 0.3 mmol, 3.0 equiv), **3w** (170.7 mg, 0.3 mmol, 3.0 equiv),  $[\text{RuCl}_2(p\text{-cymene})]_2$  (3.0 mg, 5.0 mol%), NaOAc (16.4 mg, 2.0 equiv) in  $\text{PhCF}_3$  (1.0 mL) was stirred at 80 °C in heating mantle for 12 h under an atmosphere of argon. At ambient temperature, EtOAc (15 mL) was added, and the mixture was filtered through a short pad of silica gel. The solvent was removed in vacuo and the residue was purified by preparative chromatography ( $R_f$  = 0.5, PE/DCM/EA = 8/1/1) afforded the product, the product was oxidized by adding 1mL  $\text{H}_2\text{O}_2$ , then DCM (10mL) and  $\text{H}_2\text{O}$  (10mL) were added for liquid separation to remove the water phase, The solvent was removed in vacuo and the residue was purified by preparative chromatography ( $R_f$  = 0.3, PE/DCM/EA = 1/1/1) afforded the product **7q** (dr = 1:1) (71 mg, 58 % yield),  $^1\text{H}$  NMR (400 MHz,  $\text{CDCl}_3$ )  $\delta$  8.70 - 8.65 (m, 2H), 8.18 - 8.07 (m, 2H), 7.69 - 7.52 (m, 14H), 7.49 - 7.37 (m, 12H), 7.30 - 7.24 (m, 8H), 7.09 (d,  $J$  = 30.4 Hz, 4H), 5.43 (dd,  $J$  = 29.6, 4.8 Hz, 2H), 5.32 (d,  $J$  = 2.8 Hz, 2H), 5.16 (dd,  $J$  = 15.2, 8.8 Hz, 2H), 5.02 (dd,  $J$  = 15.2, 8.8 Hz, 2H), 4.50 - 4.39 (m, 3H), 4.27 - 4.01 (m, 8H), 3.89 - 3.68 (m, 4H), 3.64 - 3.48 (m, 3H), 3.22 - 3.05 (m, 2H), 2.96 (dd,  $J$  = 30.8, 16.0 Hz, 2H), 2.23 - 1.94 (m, 10H), 1.82 - 1.69 (m, 6H), 1.59 - 1.40 (m, 23H), 1.38 - 1.32 (m, 4H), 1.30 - 1.21 (m, 18H), 1.21 - 1.14 (m, 5H), 1.09 - 0.90 (m, 20H), 0.87 - 0.82 (m, 8H), 0.81 - 0.79 (m, 10H), 0.70 (s, 6H).  $^{13}\text{C}$  NMR (126 MHz,  $\text{CDCl}_3$ )  $\delta$  174.7, 162.7 (t,  $J$  = 32.8 Hz), 162.7 (d,  $J$  = 32.8 Hz), 139.0, 138.8, 138.4, 137.1, 136.9, 136.0, 135.8, 134.9 (d,  $J$  = 6.3 Hz), 133.6, 133.4 (d,  $J$  = 3.8 Hz), 133.3 (d,  $J$  = 11.3 Hz), 133.2 (d,  $J$  = 11.3 Hz), 132.8, 132.5 (d,  $J$  = 21.4 Hz), 132.4 (d,  $J$  = 21.4 Hz), 132.3 - 132.1 (m), 131.1, 131.0, 130.4 (d,  $J$  = 98.3 Hz), 130.2, 129.5, 128.8 - 128.5 (m), 128.3, 127.3, 126.5, 126.3, 124.9 (d,  $J$  = 15.1 Hz), 124.8 (d,  $J$  = 15.1 Hz), 123.5, 123.4, 116.1 (t,  $J$  = 252.0 Hz), 116.0 (t,  $J$  = 252.0 Hz), 109.8, 109.4, 108.9, 108.8, 96.2, 96.1, 77.1, 71.1, 70.7, 70.6, 70.5, 70.3, 66.2, 64.7, 63.3, 57.0, 56.9, 56.1, 52.4, 51.4, 50.1, 42.3, 40.6, 39.8, 37.5, 37.3, 36.8, 36.7, 36.6, 32.0, 31.9, 29.0, 27.3, 27.1, 26.2, 25.5, 25.1, 24.5,

21.4, 21.2, 21.1, 19.4, 19.1, 12.4, 12.2. **<sup>31</sup>P NMR** (162 MHz, CDCl<sub>3</sub>) δ 32.8, 32.7. **<sup>19</sup>F NMR** (377 MHz, CDCl<sub>3</sub>) δ -104.0 - -104.3 (m), -104.7 - -105.0 (m). **HRMS** (ESI) m/z: [M+H]<sup>+</sup> calcd for C<sub>75</sub>H<sub>92</sub>F<sub>2</sub>O<sub>10</sub>P<sup>+</sup> 1221.6391; found 1221.6387.

## 4. Crystallographic Data

X-ray data for **4f**

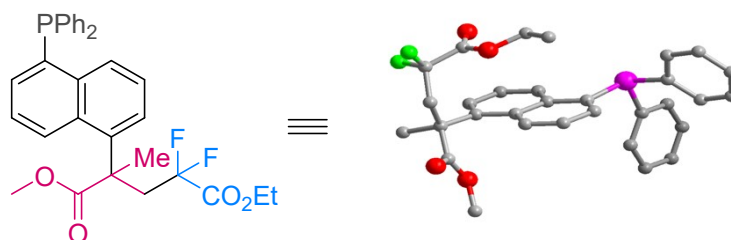

Compound **4f**

| Compound                                             | 4f                                                              |
|------------------------------------------------------|-----------------------------------------------------------------|
| Formula                                              | C <sub>31</sub> H <sub>29</sub> F <sub>2</sub> O <sub>4</sub> P |
| Formula weight                                       | 534.51                                                          |
| T(K)                                                 | 293                                                             |
| Crystal system                                       | triclinic                                                       |
| Space group                                          | P -1                                                            |
| <i>a</i> (Å)                                         | 9.62340(10)                                                     |
| <i>b</i> (Å)                                         | 10.49270(10)                                                    |
| <i>c</i> (Å)                                         | 14.0802(2)                                                      |
| <i>α</i> (°)                                         | 99.3100(10)                                                     |
| <i>β</i> (°)                                         | 98.0540(10)                                                     |
| <i>γ</i> (°)                                         | 100.6190(10)                                                    |
| <i>V</i> (Å <sup>3</sup> )                           | 1357.67(3)                                                      |
| <i>Z</i>                                             | 2                                                               |
| <i>D<sub>c</sub></i> . (g cm <sup>3</sup> )          | 1.307                                                           |
| <i>μ</i> (mm <sup>-1</sup> )                         | 1.311                                                           |
| reflns coll.                                         | 17430                                                           |
| unique reflns                                        | 5457                                                            |
| <i>R</i> <sub>int</sub>                              | 0.0332                                                          |
| <sup>a</sup> <i>R</i> 1 [ <i>I</i> ≥ 2σ( <i>I</i> )] | 0.0366                                                          |
| <sup>b</sup> <i>w R</i> <sub>2</sub> (all data)      | 0.1050                                                          |

---


$$^aR_I = \Sigma||F_o|-|F_c||/\Sigma|F_o|, ^bWR_2 = [\Sigma w(F_o^2-F_c^2)^2/\Sigma w(F_o^2)^2]^{1/2}$$


---

## 5. References

- [1] Bao, Z.-P.; Zhang, Y.; Wu, X.-F. Palladium-catalyzed difluoroalkylative carbonylation of styrenes toward difluoropentanedioates. *Chem. Sci.*, **2022**, *13*, 9387 - 9391.
- [2] Han, X.; Wang, Y.; Zhong, F.; Lu, Y. Enantioselective [3 + 2] Cycloaddition of Allenes to Acrylates Catalyzed by Dipeptide-Derived Phosphines: Facile Creation of Functionalized Cyclopentenones Containing Quaternary Stereogenic Centers. *J. Am. Chem. Soc.*, **2011**, *133*, 1726 - 1729.
- [3] Fu, Y.; Chen, C.-H.; Huang, M.-G.; Tao, J.-Y.; Peng, X.; Xu, H.-B.; Liu, Y.-J.; Zeng, M.-H. Remote C5-Selective Functionalization of Naphthalene Enabled by P-Ru-C Bond-Directed  $\delta$ -Activation. *ACS Catal.*, **2022**, *12*, 5036 - 5047.
- [4] Kim, J.; Shokova, E.; Tafeenko, V.; Kovalev, V. (CF<sub>3</sub>CO)<sub>2</sub>O/CF<sub>3</sub>SO<sub>3</sub>H-mediated synthesis of 1,3-diketones from carboxylic acids and aromatic ketones. *Beilstein J. Org. Chem.*, **2014**, *10*, 2270 - 2278.
- [5] Xu, W.-Q.; Tao, J.-Y.; Liu, Y.-J.; Zeng, M.-H. Ruthenium-catalyzed meta-difluoromethylation of arene phosphines enabled by 1,3-dione. *Org. Chem. Front.*, **2022**, *9*, 4052 - 4056.
- [6] Y. Shen, D. L. Burgoyne, R. W. Lauener, Y. Zhou, P. J. Rebstein, S. D. M. Abraham, Patent *US20030186943*.

**<sup>1</sup>H NMR, CDCl<sub>3</sub>, 400 MHz**

Chemical structure of **4a** is shown above the spectrum. The spectrum displays peaks in the aromatic region (7.0-8.6 ppm), a methoxy singlet (3.8 ppm), a methine doublet (3.5 ppm), a diethyl phosphonate quartet (1.0 ppm), and a benzyl singlet (2.9 ppm). Integration values are provided below the baseline.

**<sup>13</sup>C NMR, CDCl<sub>3</sub>, 101 MHz**

Chemical structure of **4a** is shown above the spectrum. The spectrum displays peaks in the aromatic region (128-176 ppm), a methoxy singlet (52 ppm), a methine doublet (42 ppm), a diethyl phosphonate quartet (13 ppm), and a benzyl singlet (29 ppm).

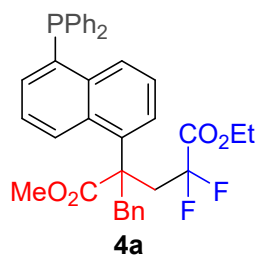

$^{31}\text{P}$  NMR,  $\text{CDCl}_3$ , 162 MHz

-13.14

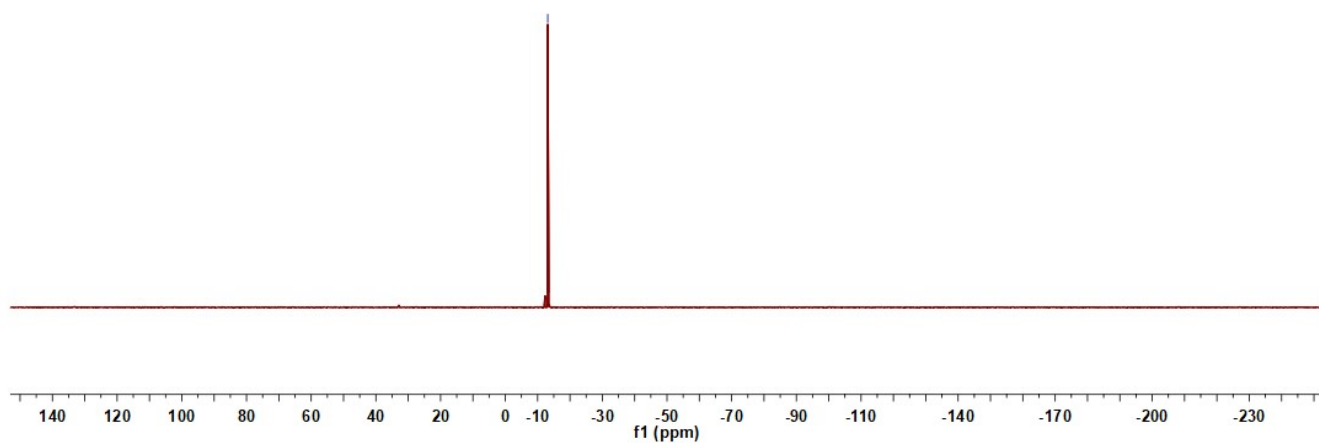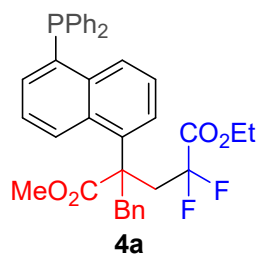

$^{19}\text{F}$  NMR,  $\text{CDCl}_3$ , 377 MHz

-105.74  
-106.45

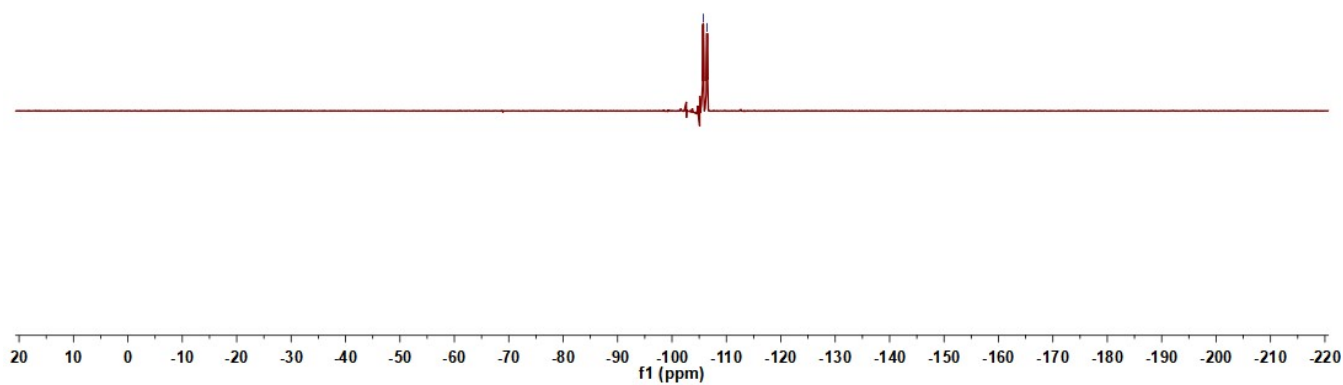

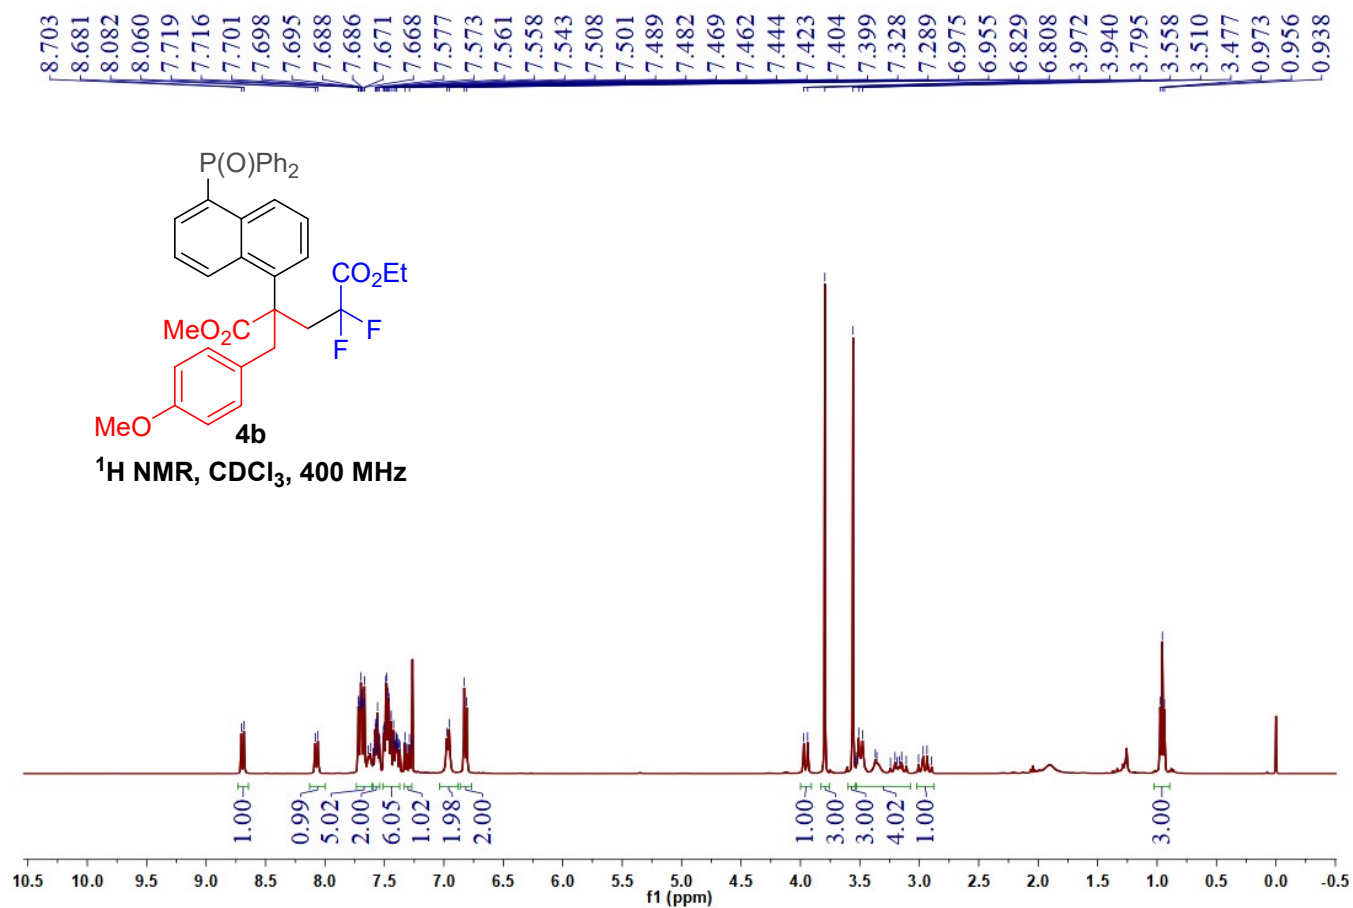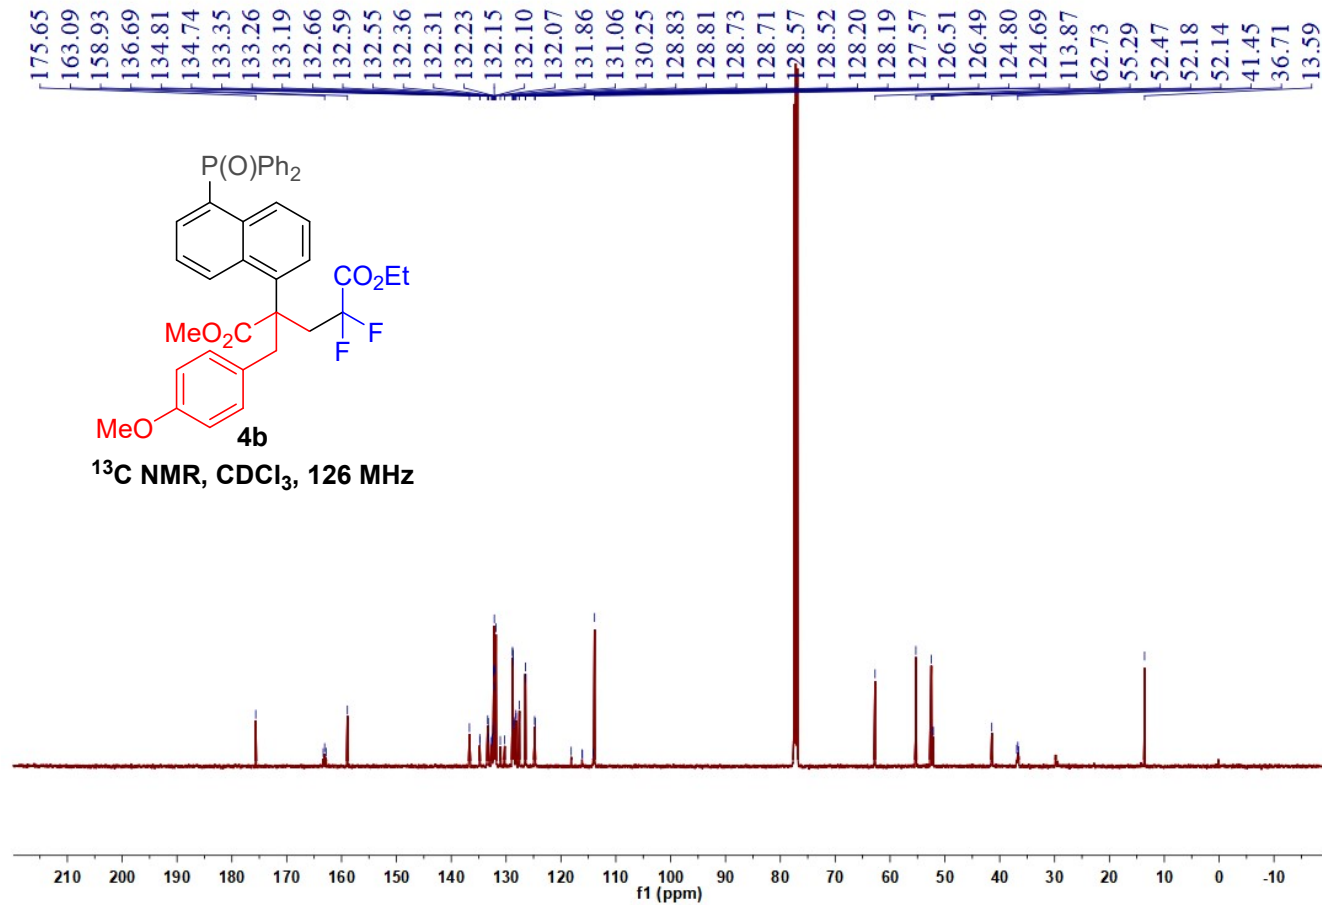

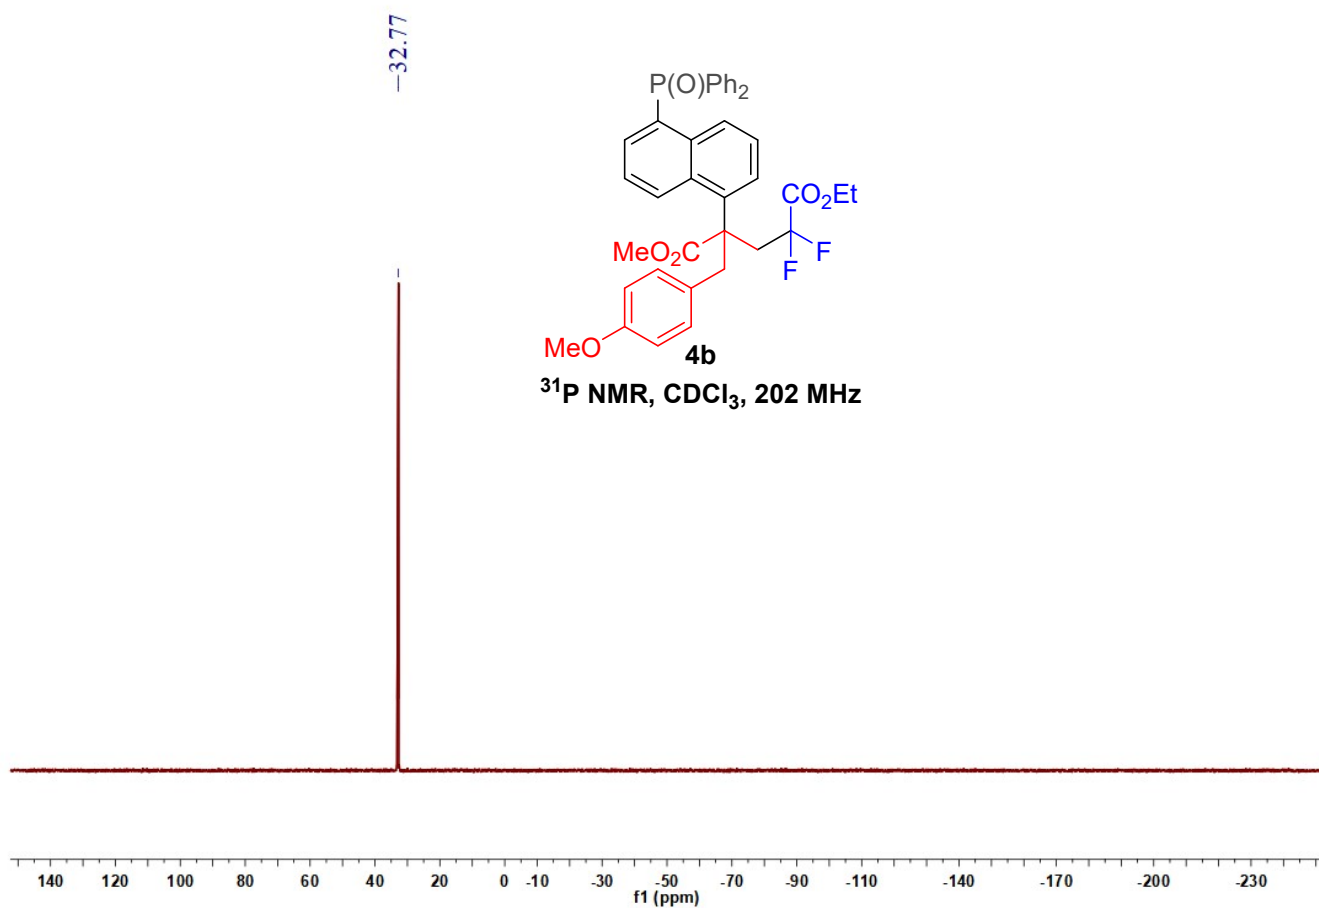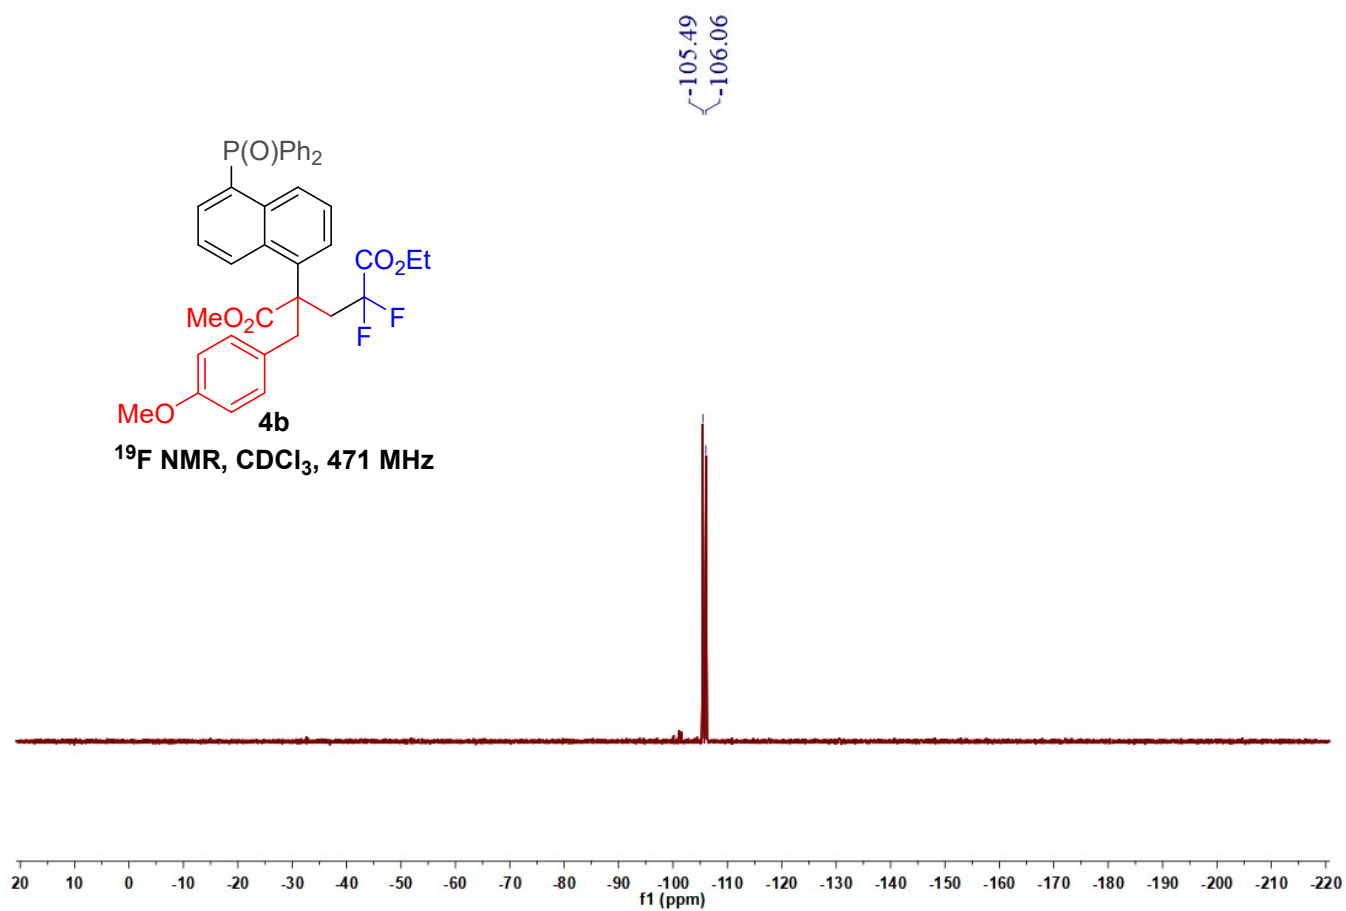



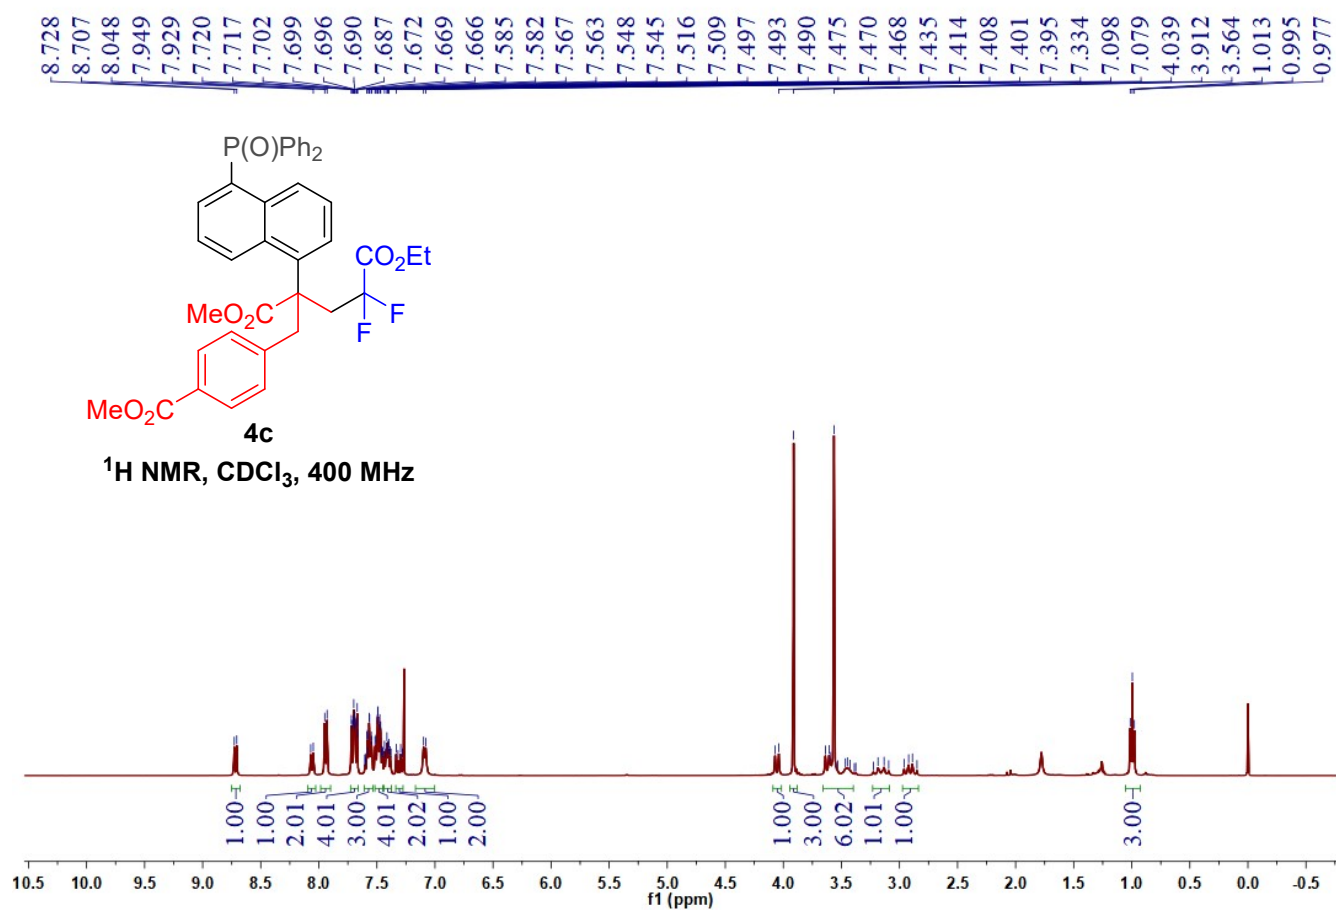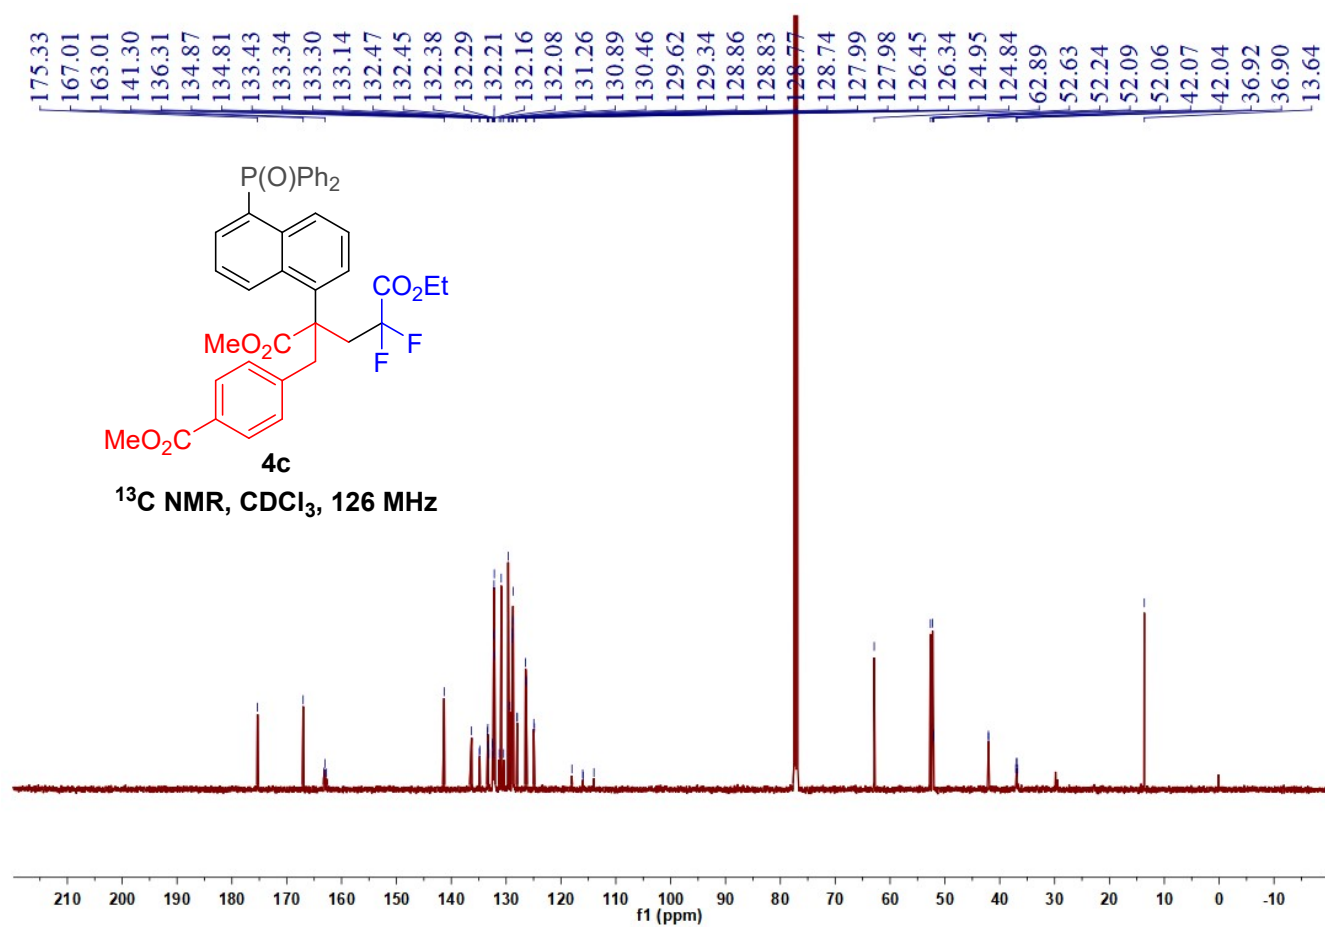

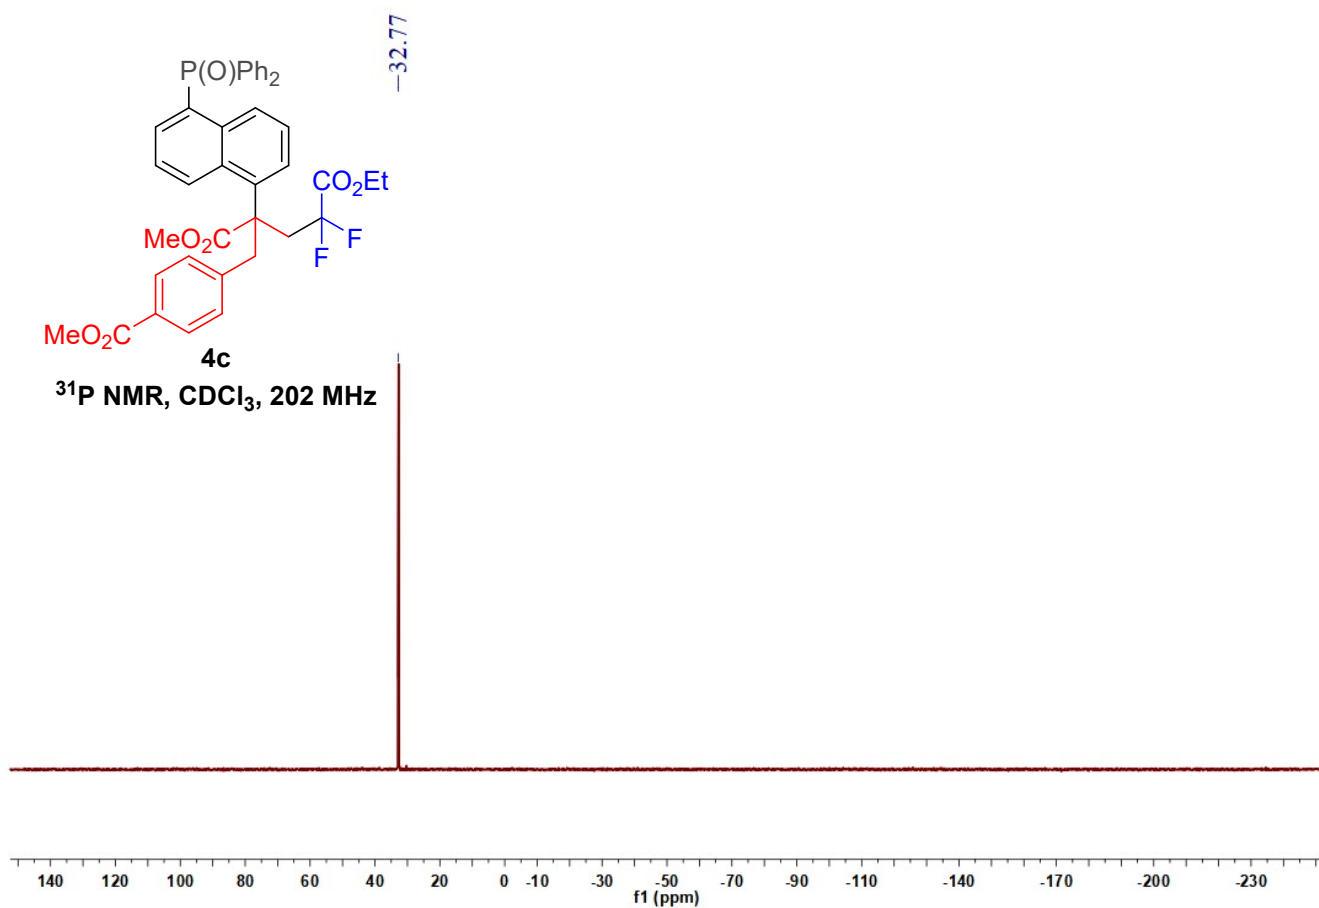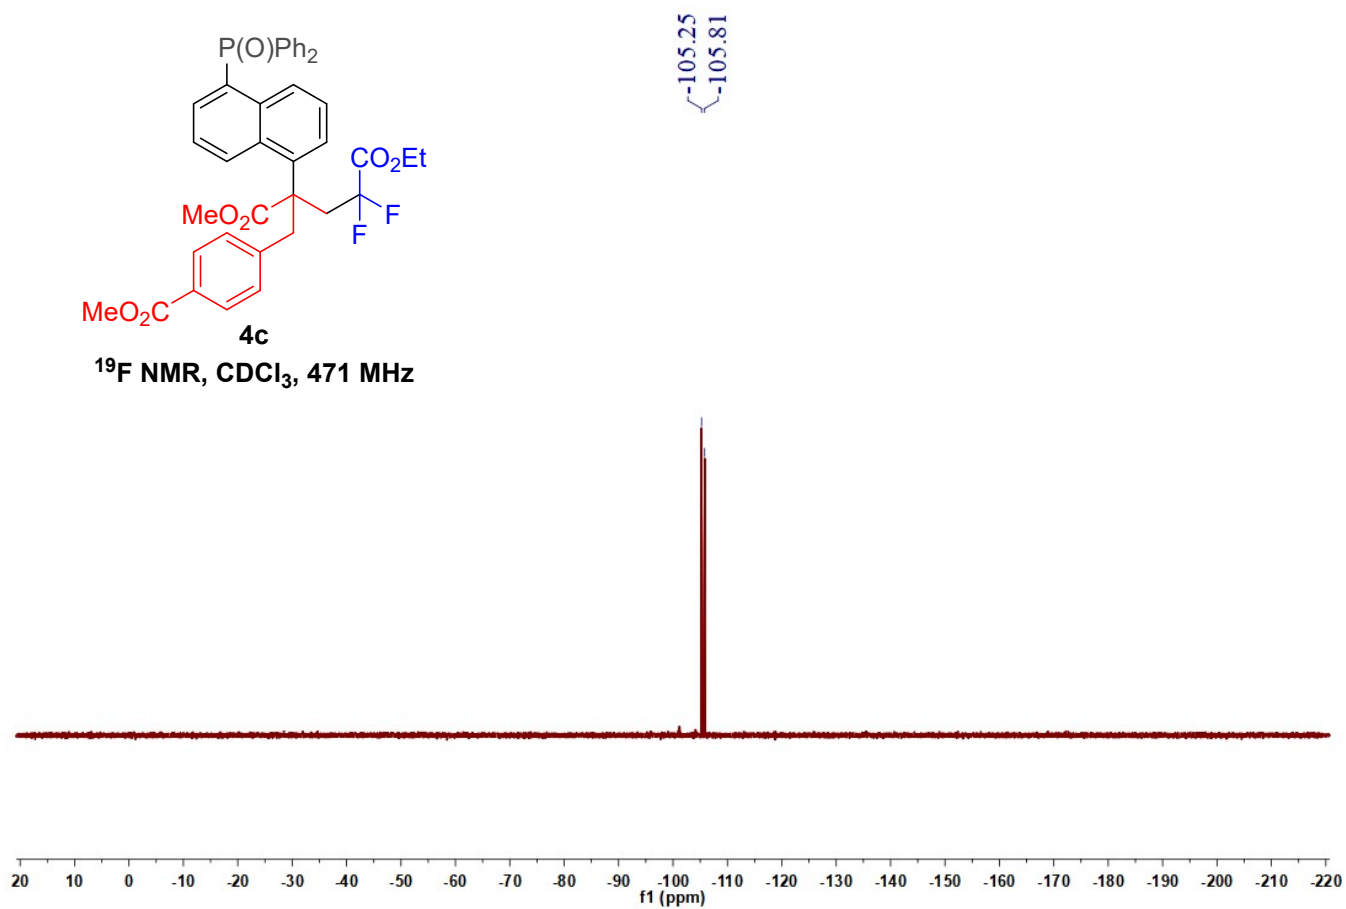

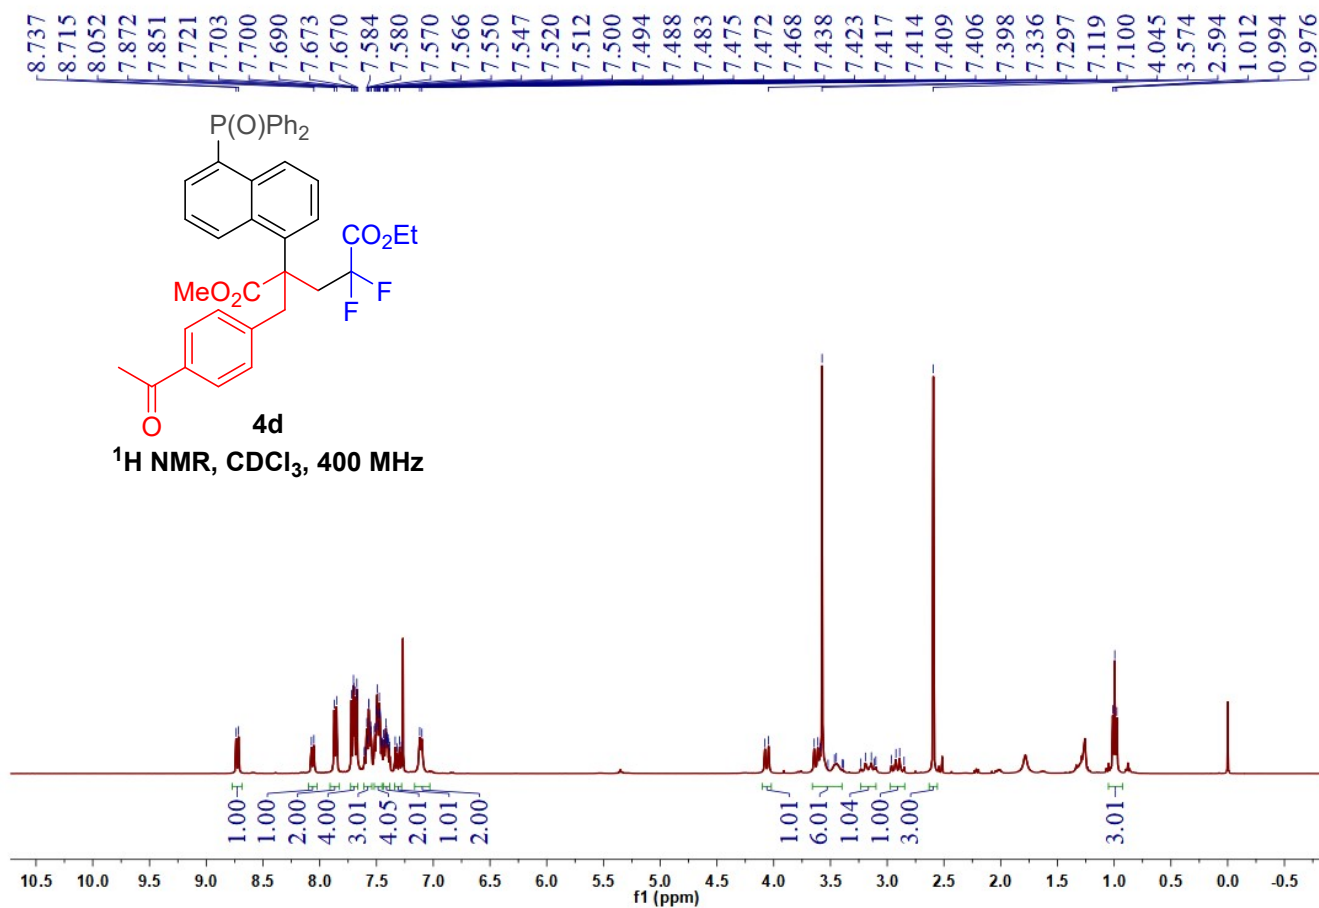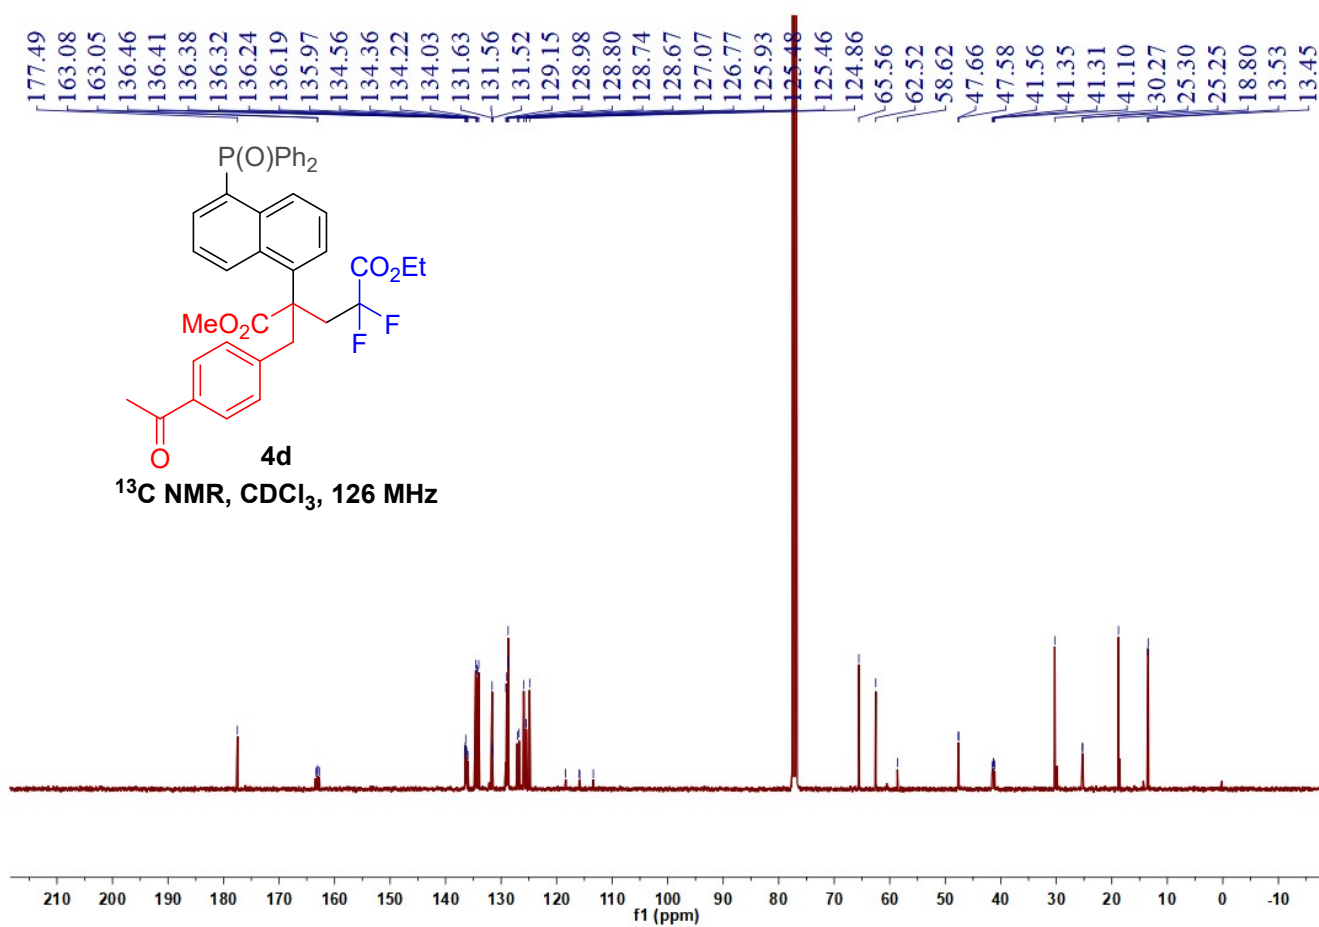

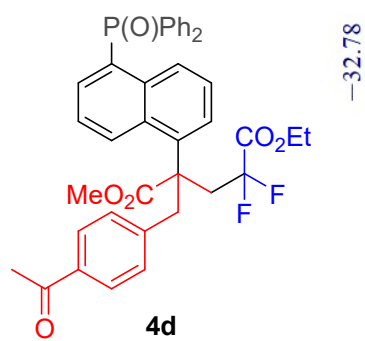

$^{31}\text{P}$  NMR,  $\text{CDCl}_3$ , 202 MHz

-32.78

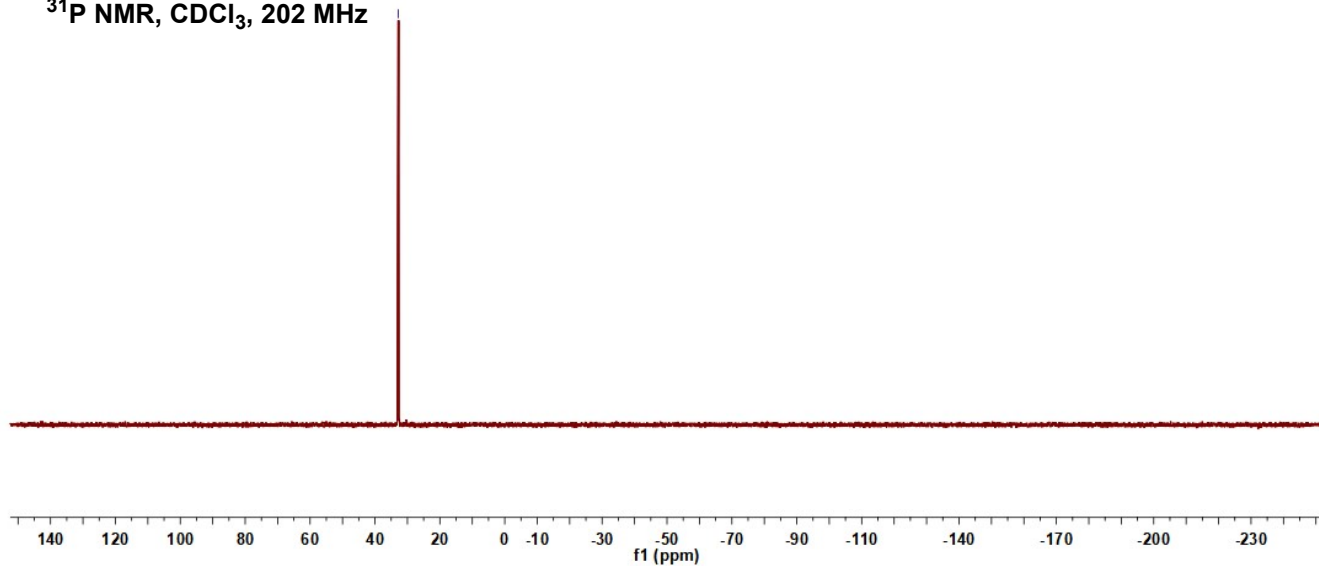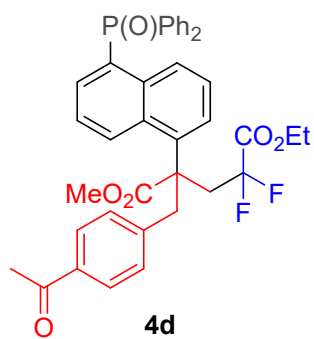

$^{19}\text{F}$  NMR,  $\text{CDCl}_3$ , 471 MHz

-105.21  
-105.78

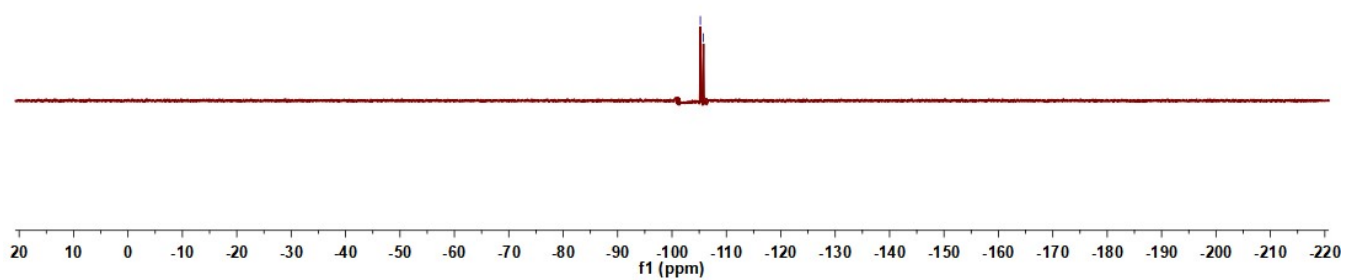

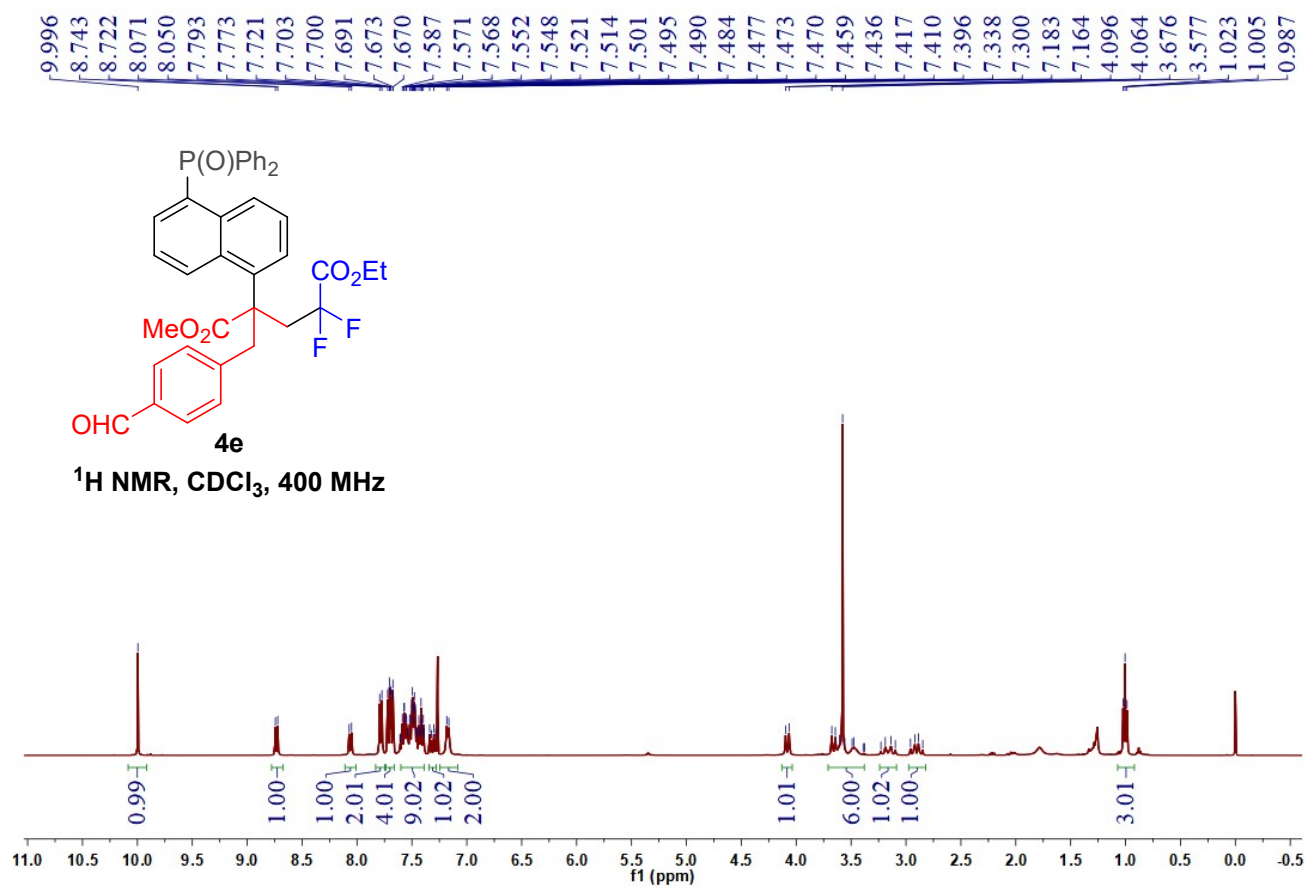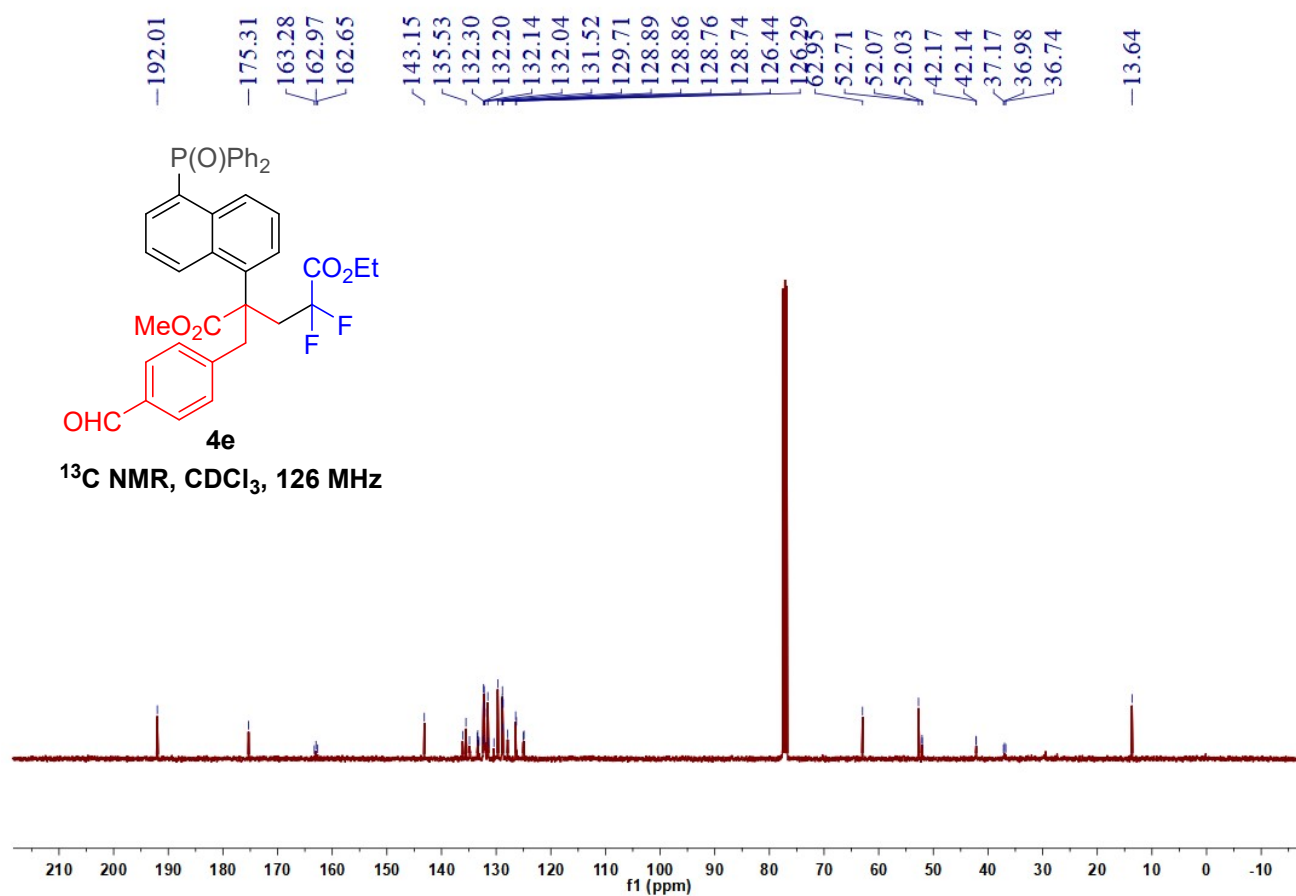

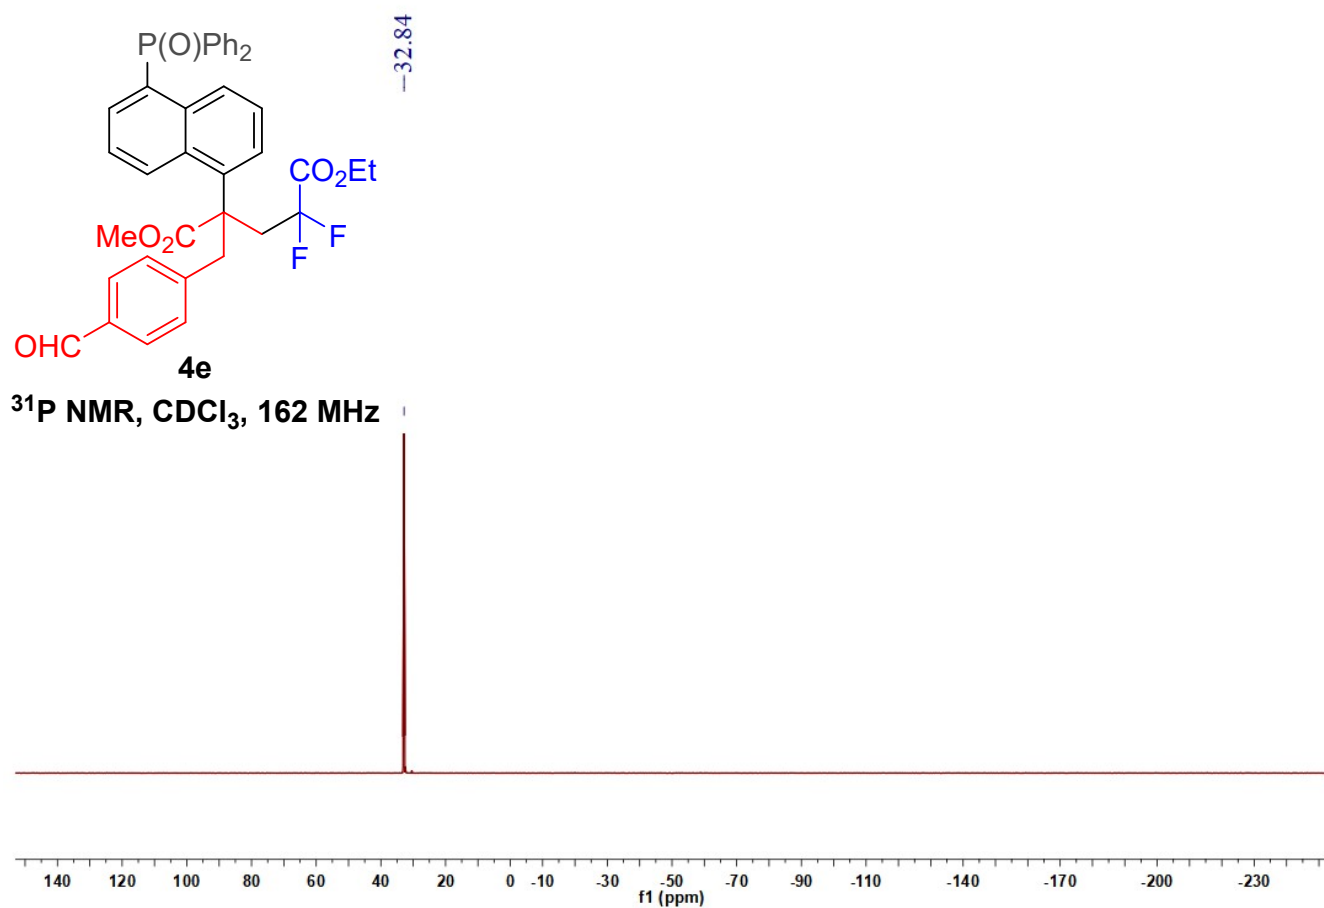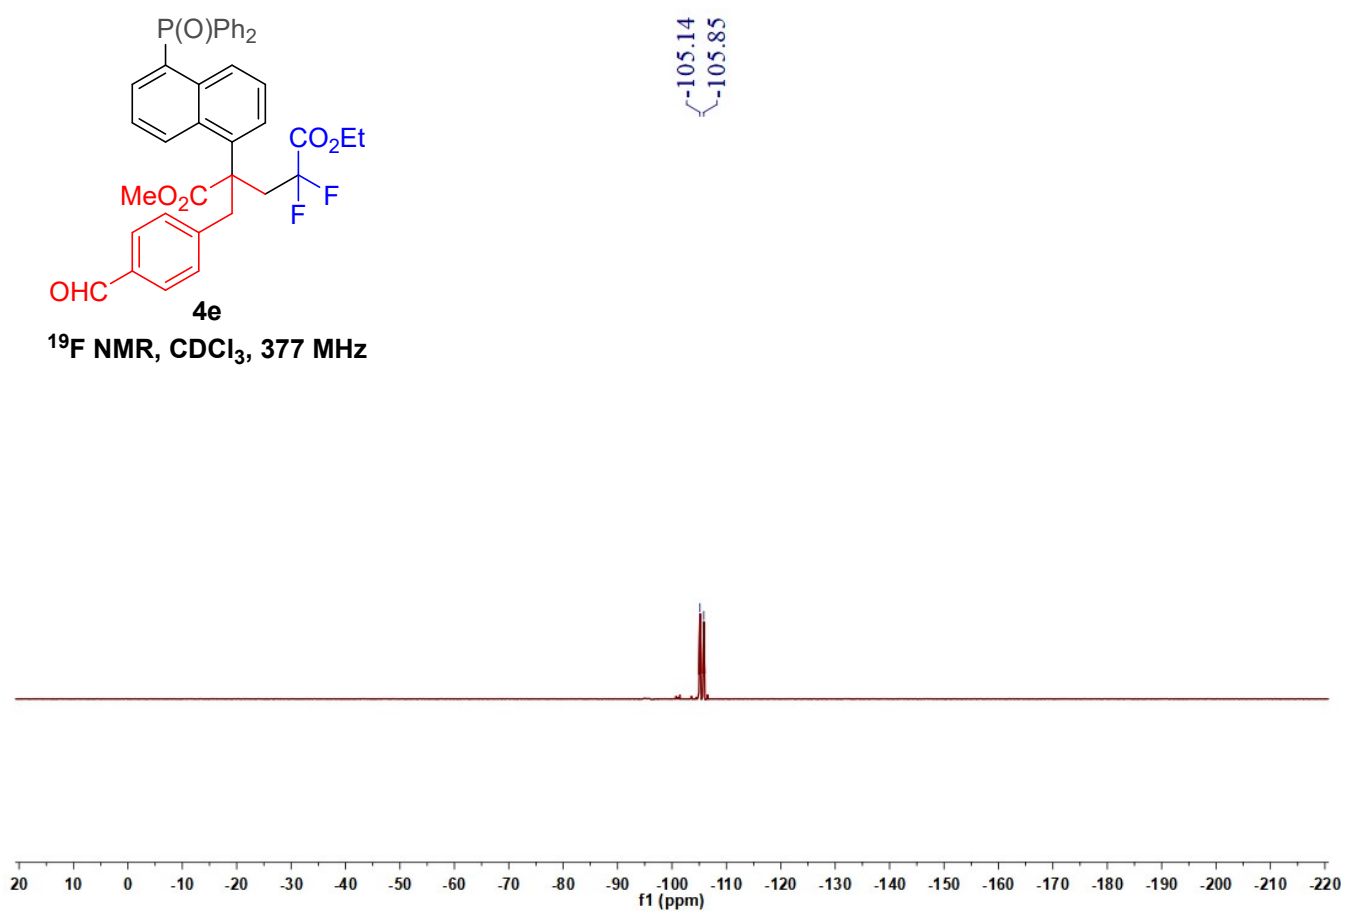

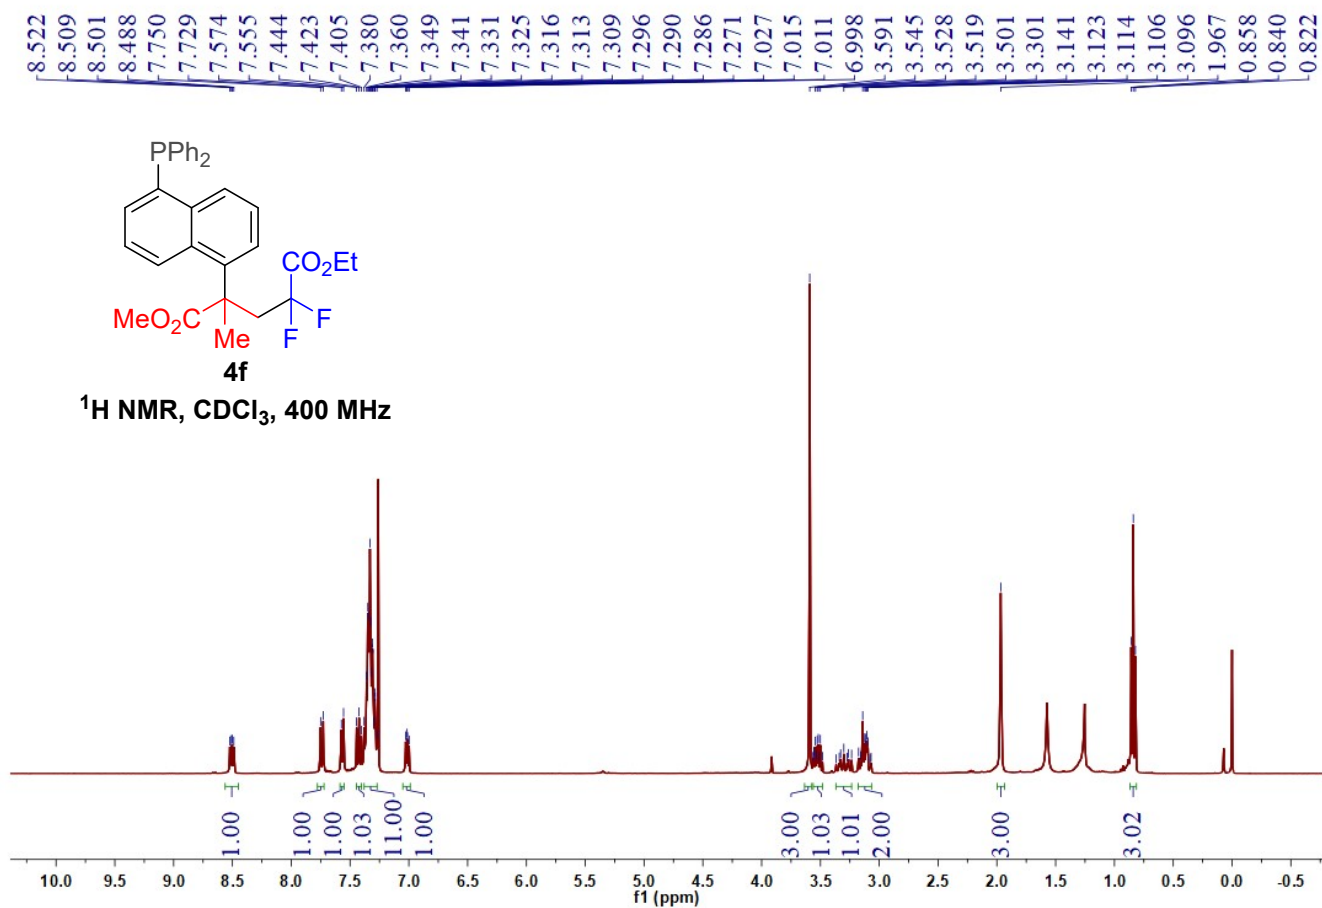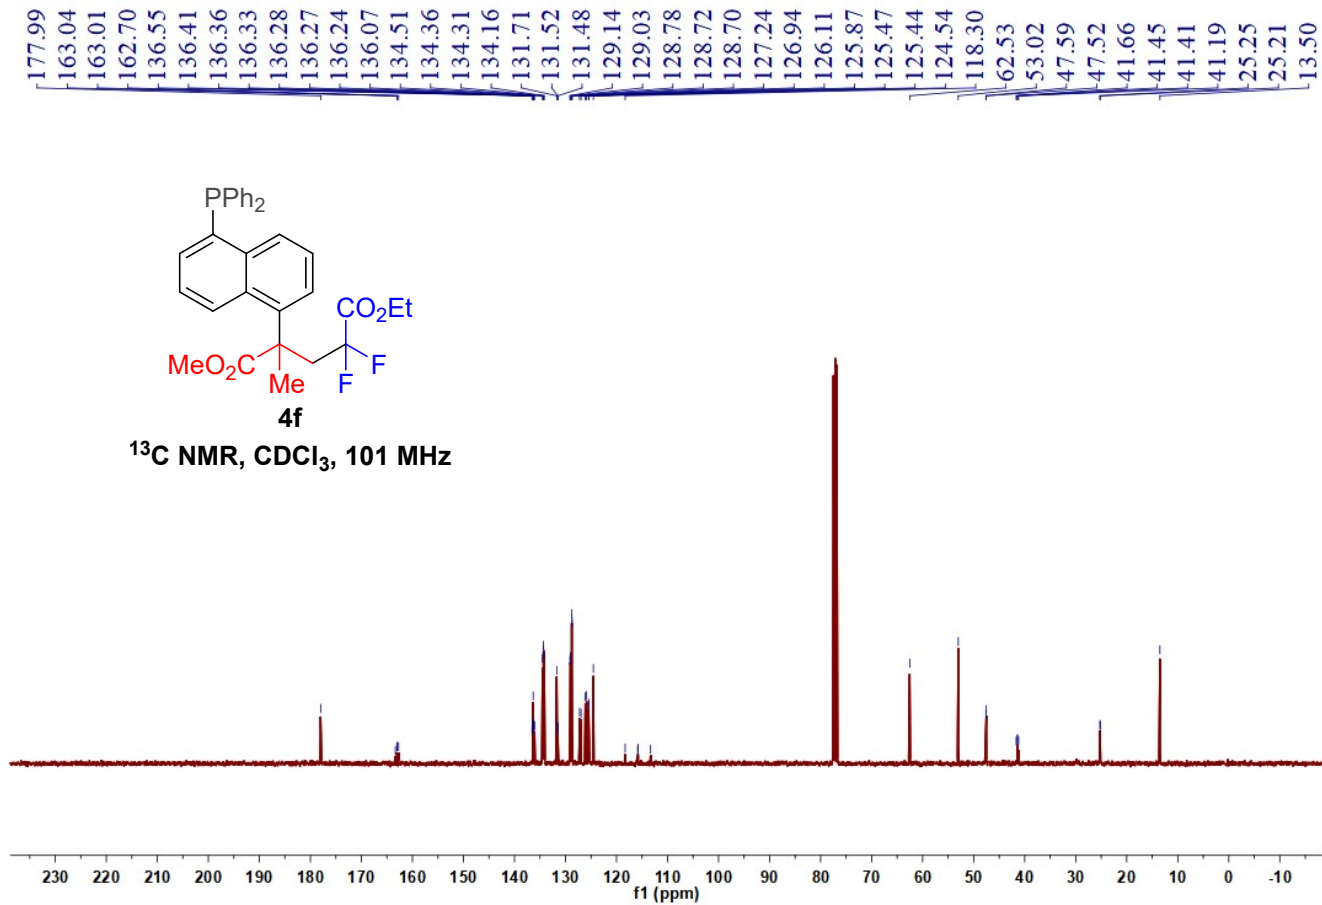



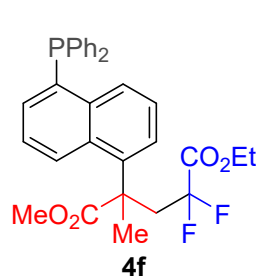

$^{31}\text{P}$  NMR,  $\text{CDCl}_3$ , 162 MHz

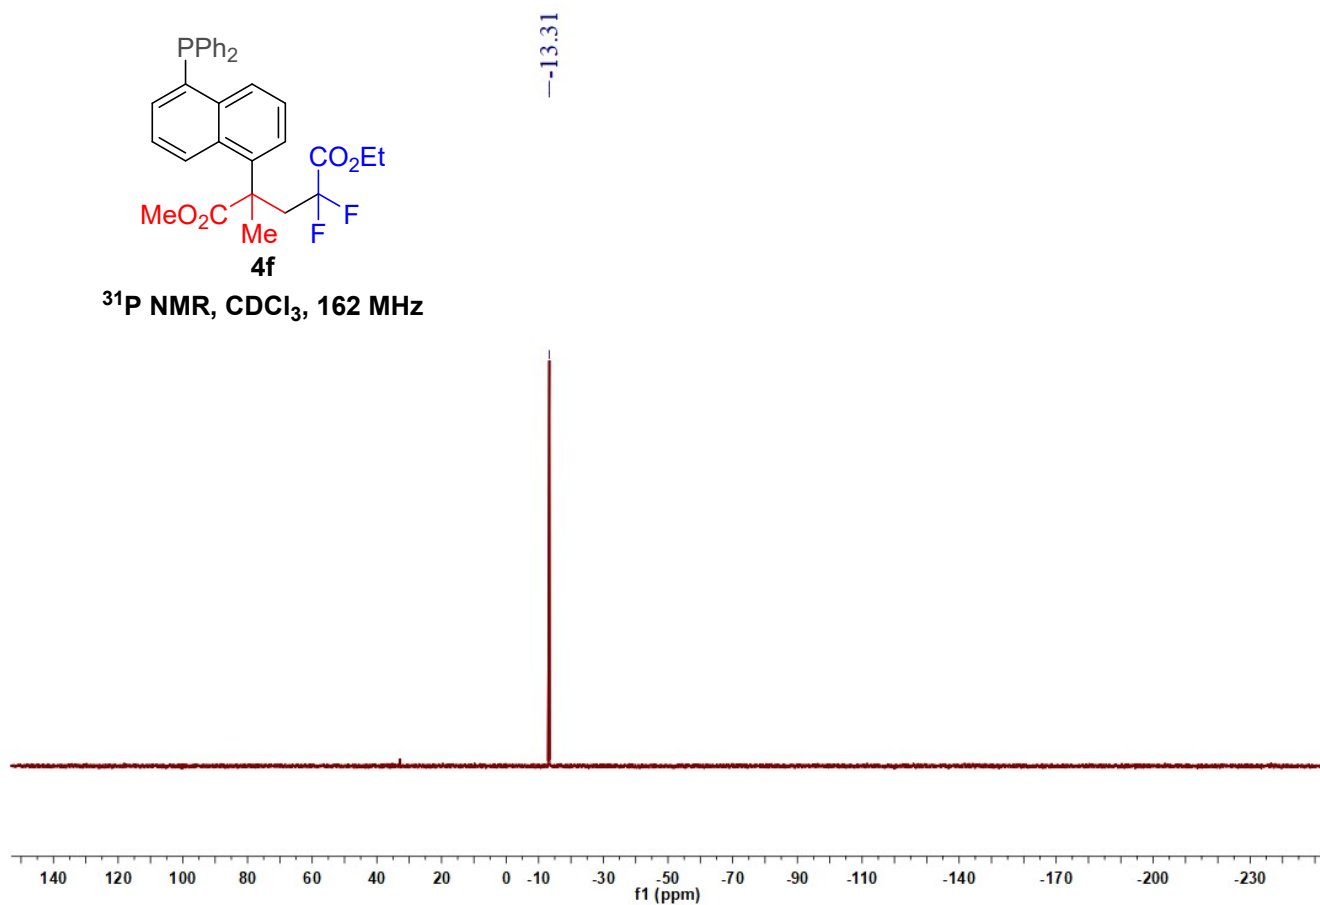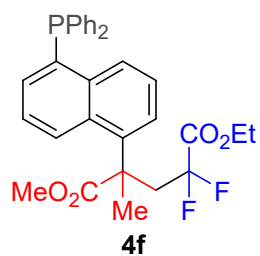

$^{19}\text{F}$  NMR,  $\text{CDCl}_3$ , 377 MHz

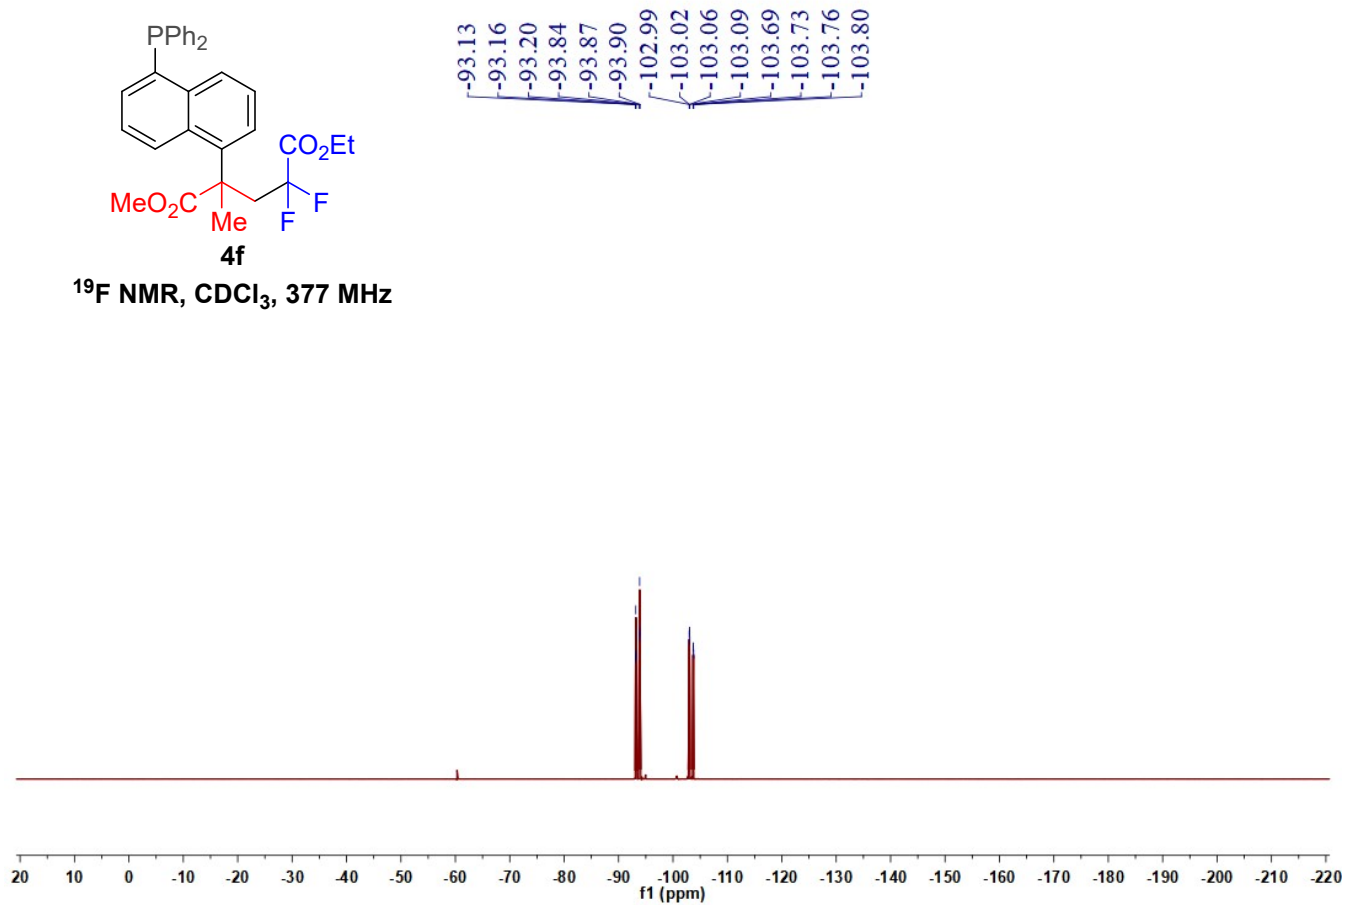



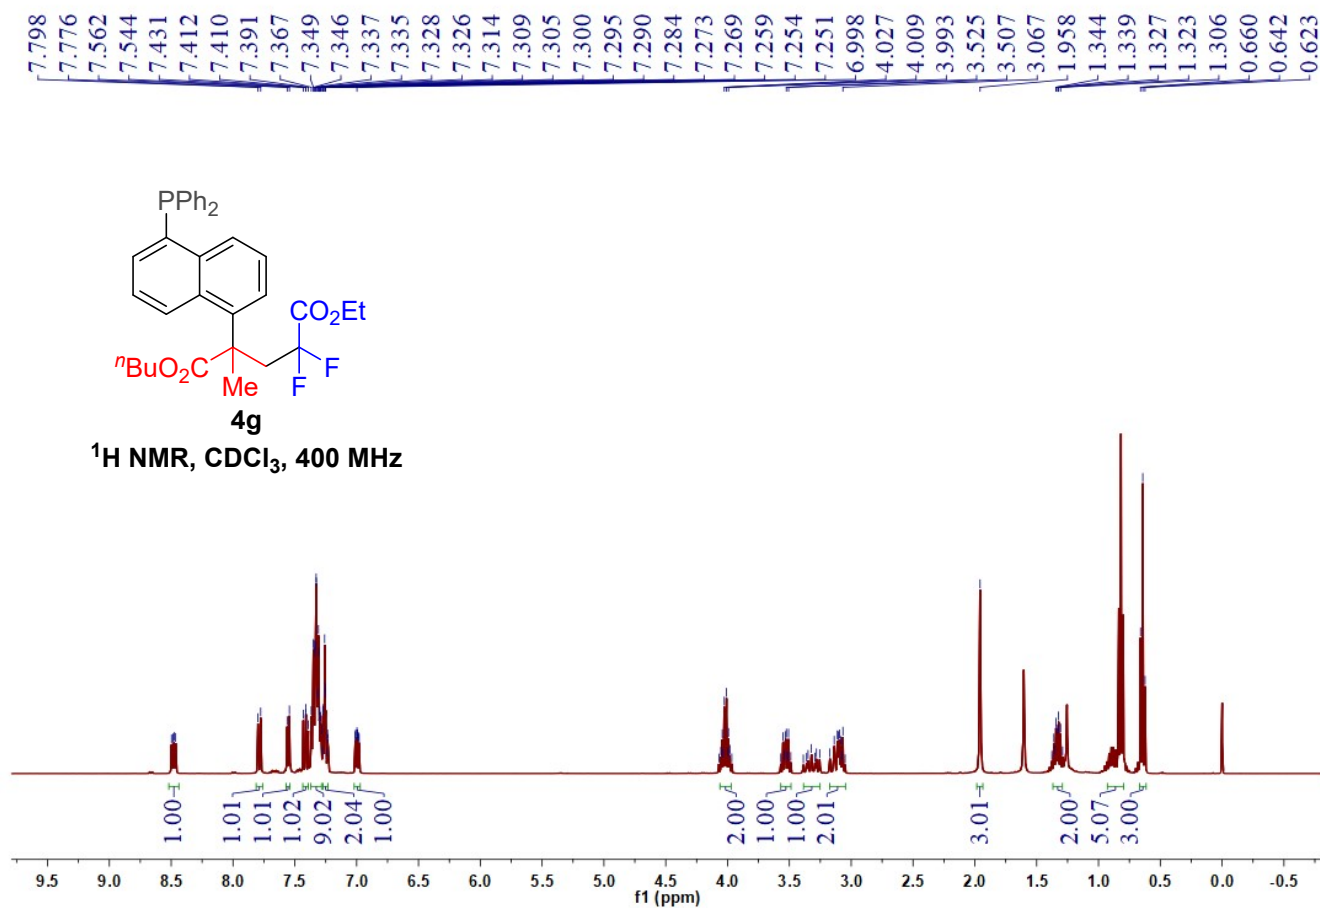

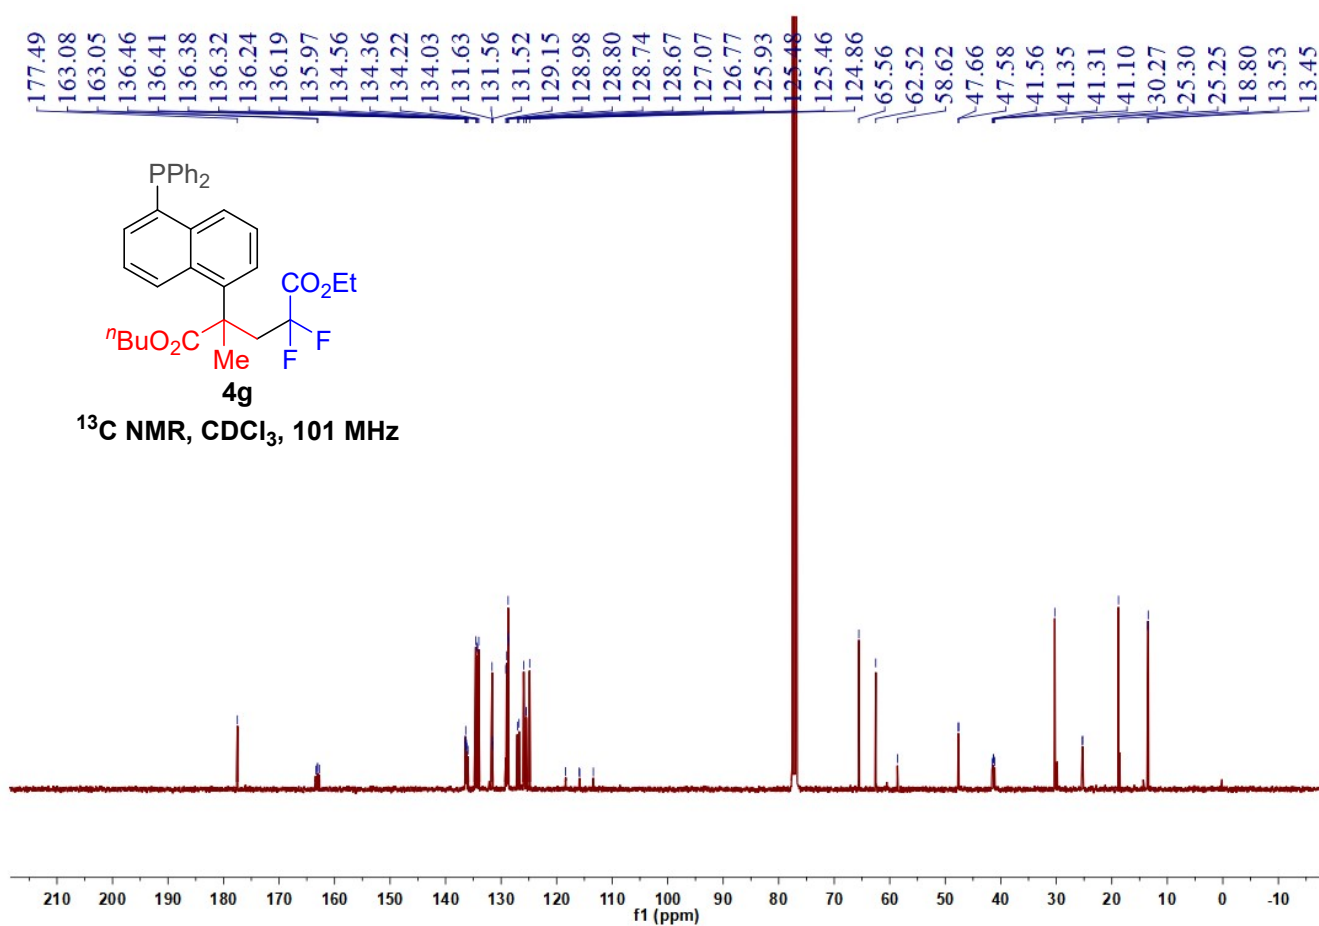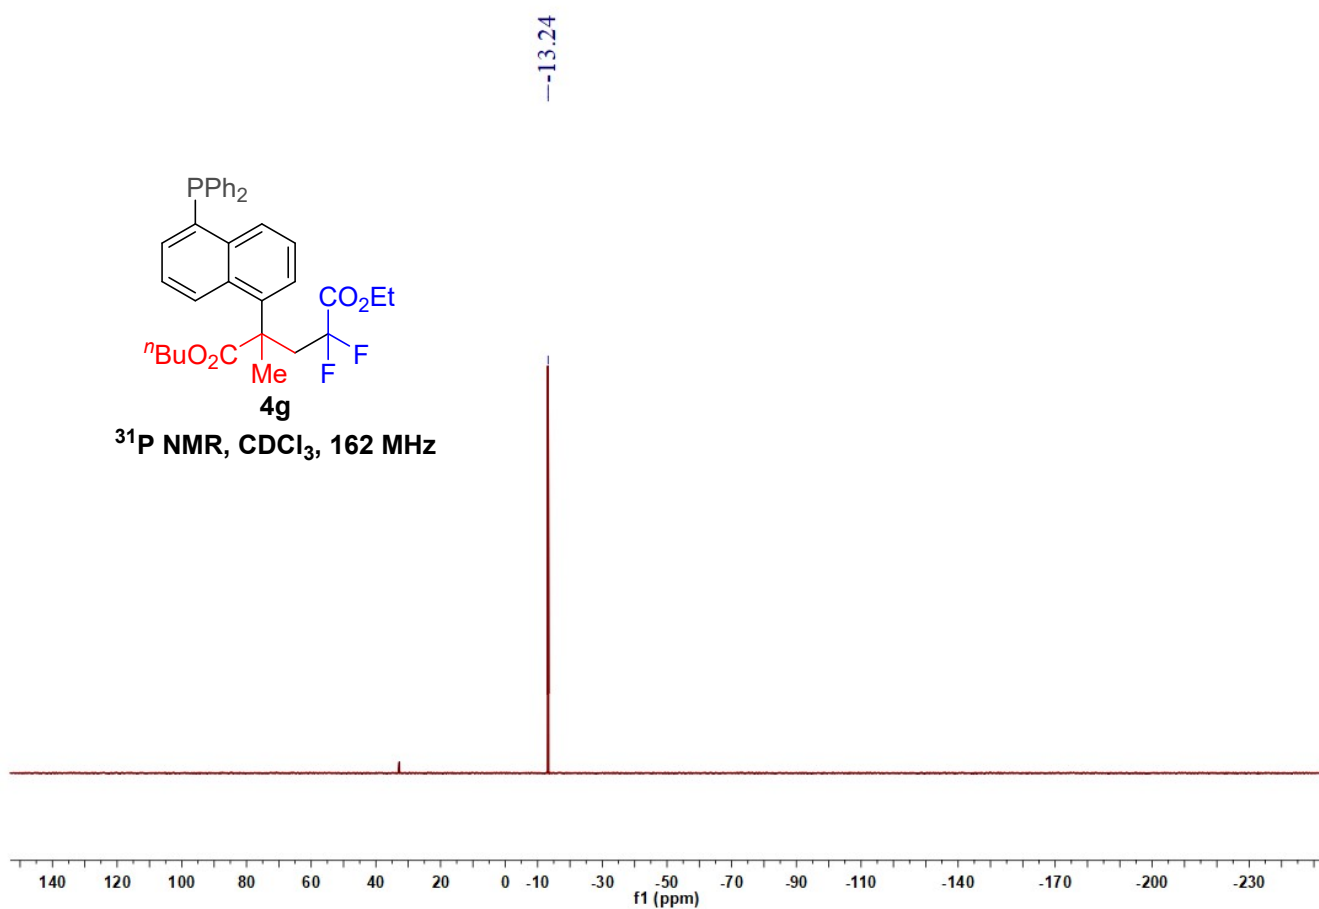

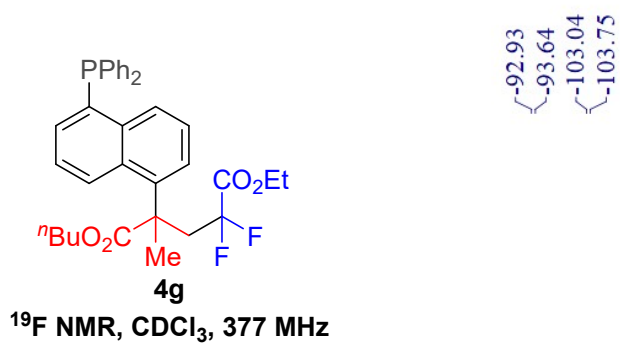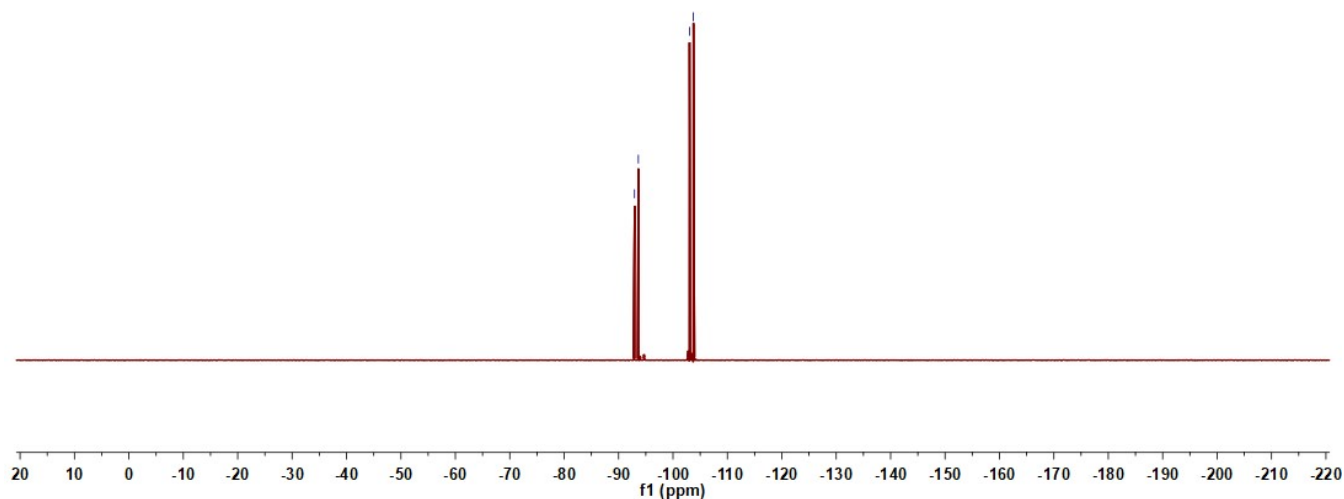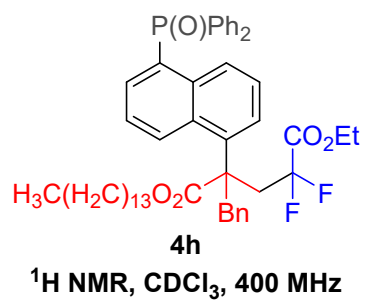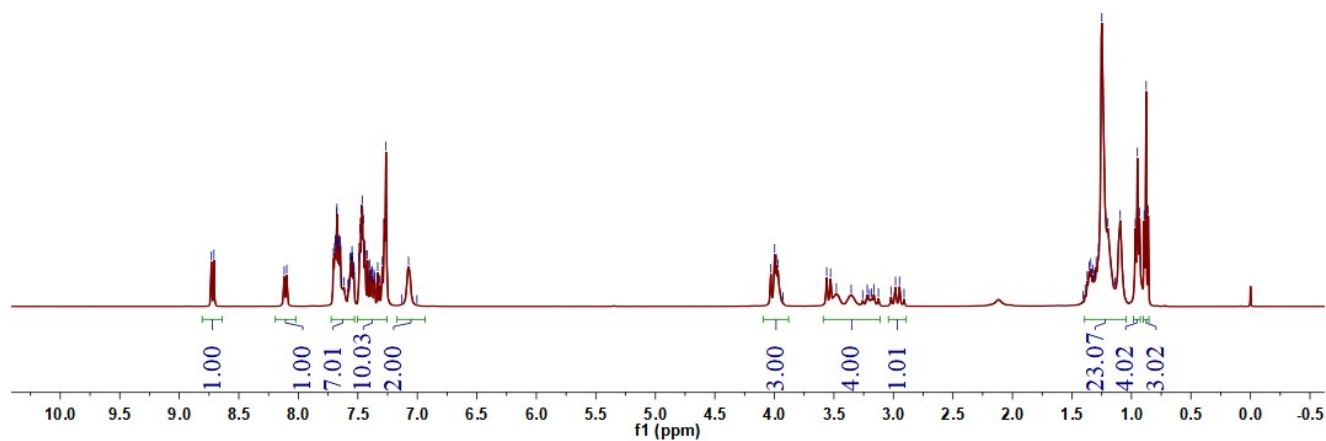

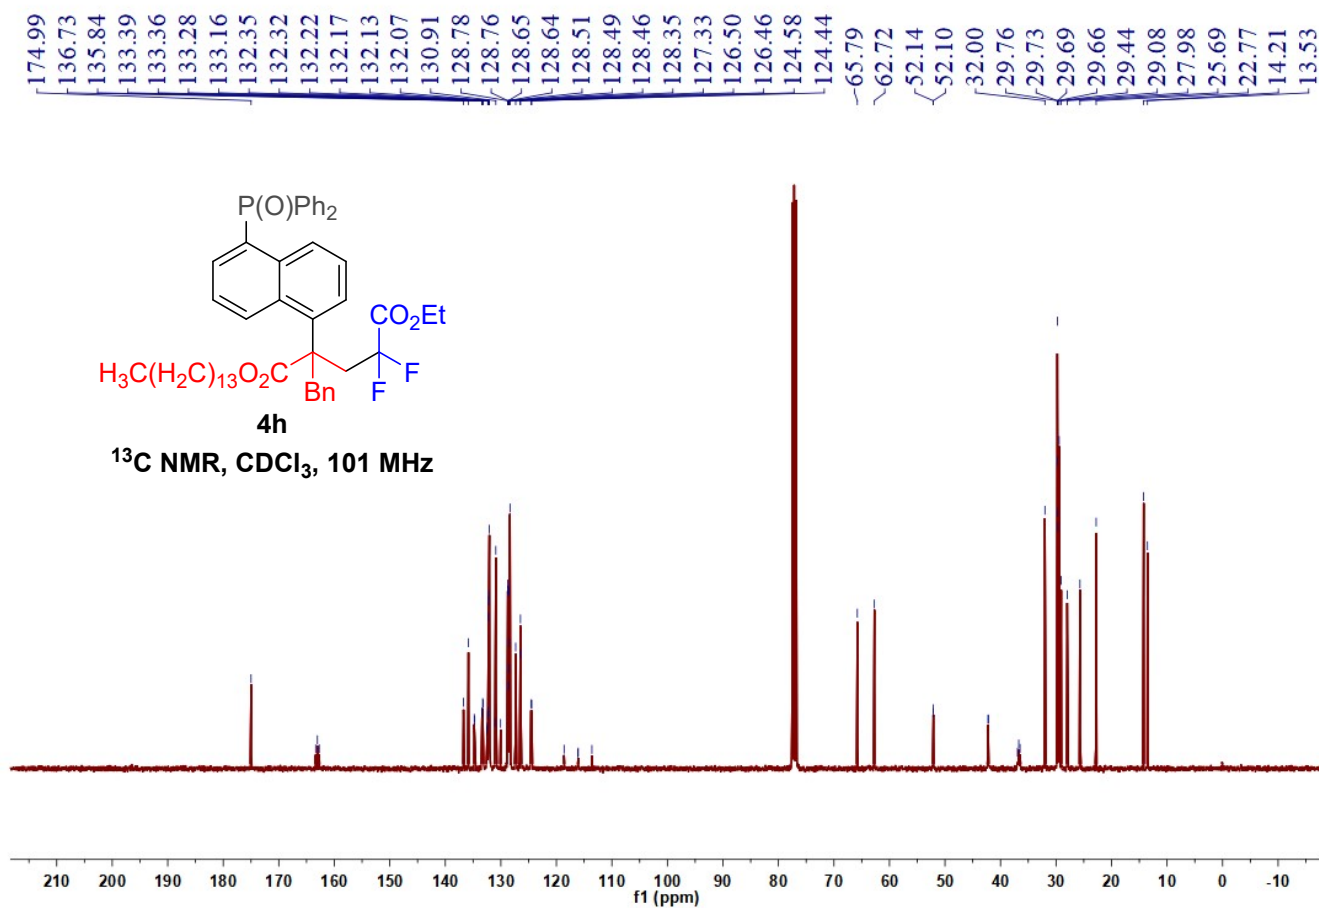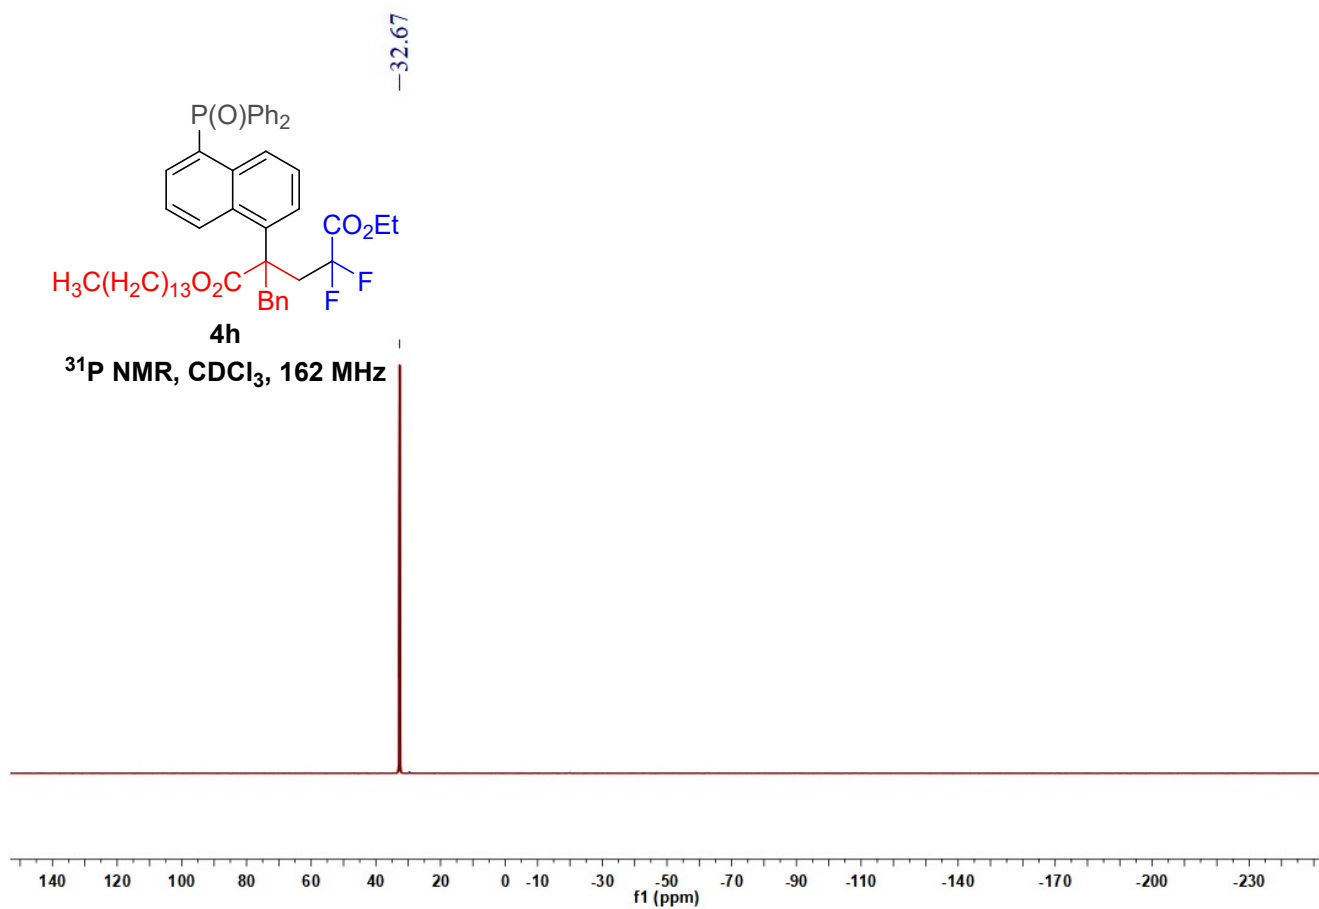

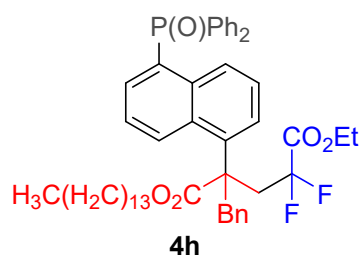

<sup>19</sup>F NMR, CDCl<sub>3</sub>, 377 MHz

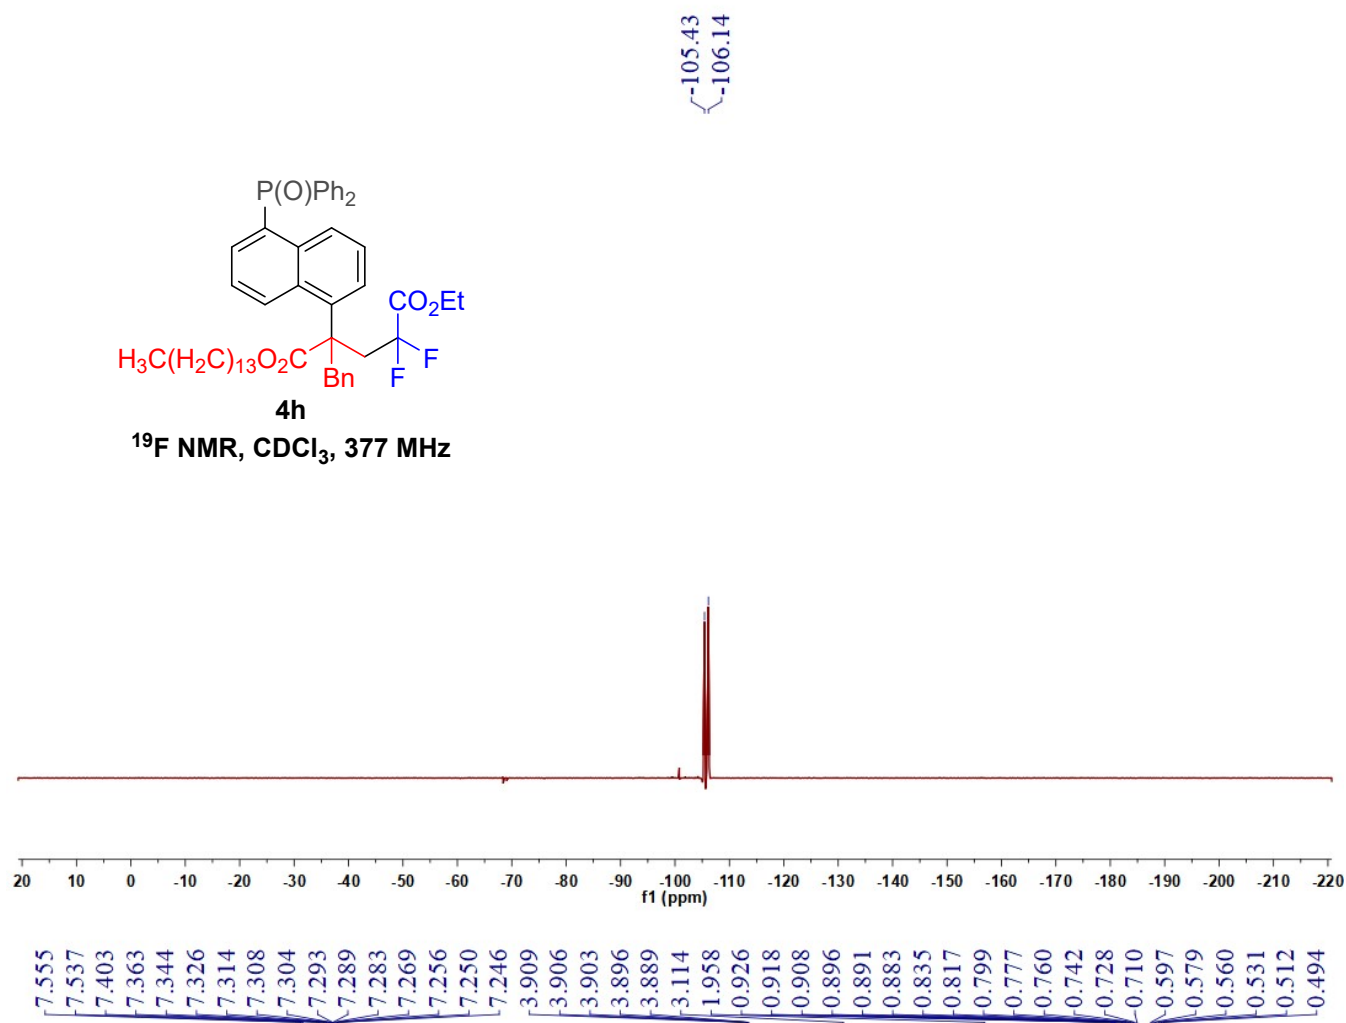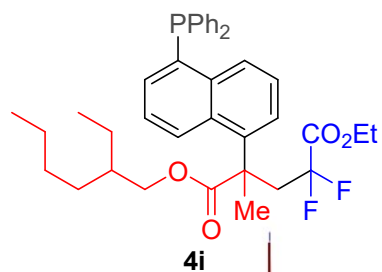

<sup>1</sup>H NMR, CDCl<sub>3</sub>, 400 MHz

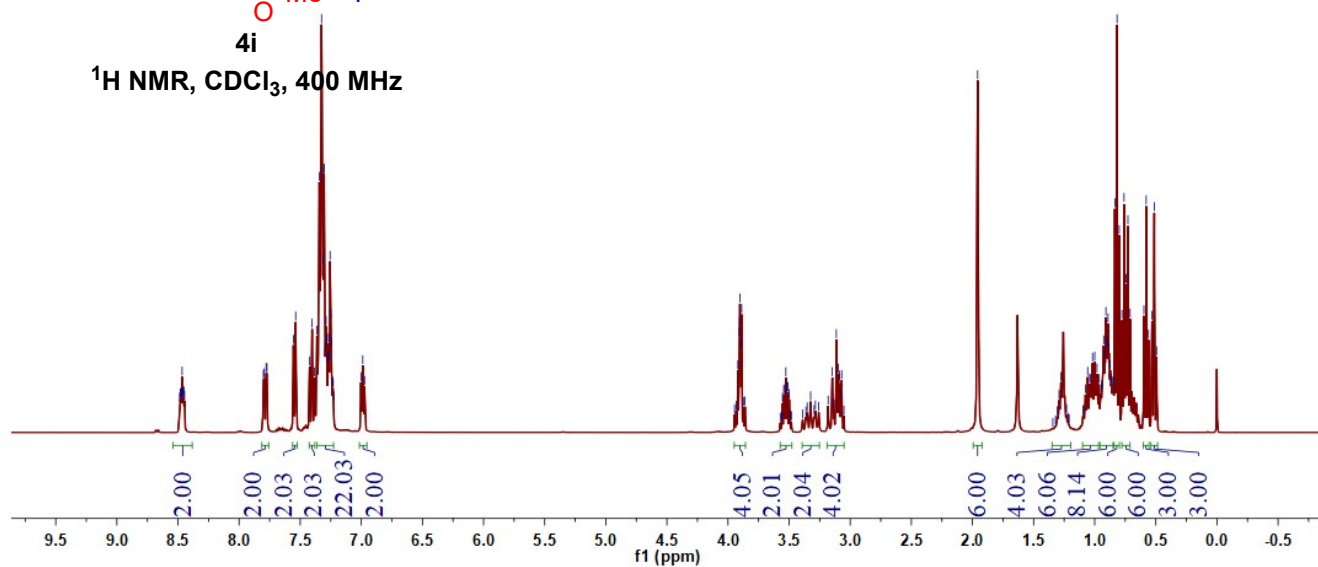

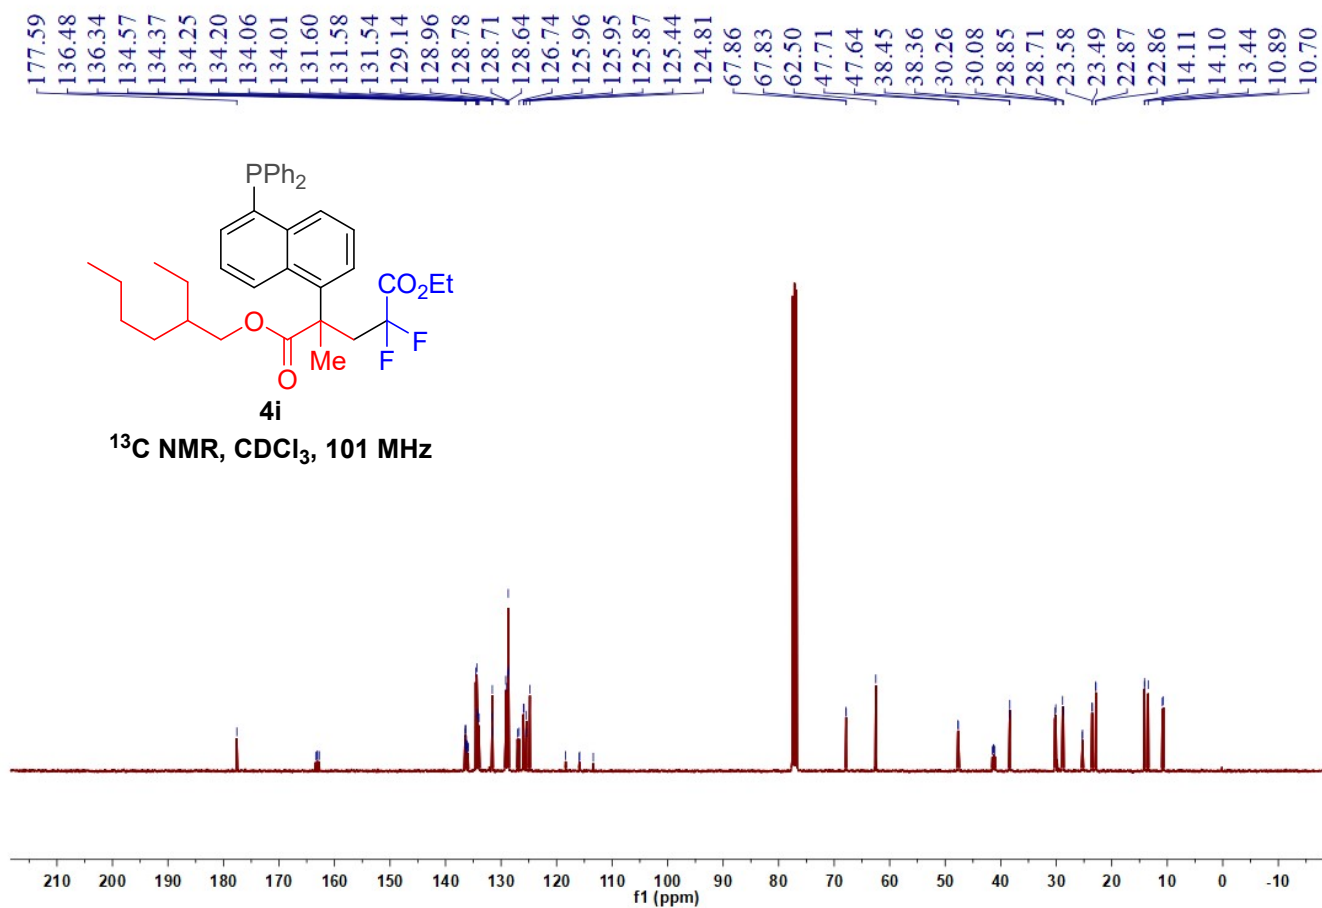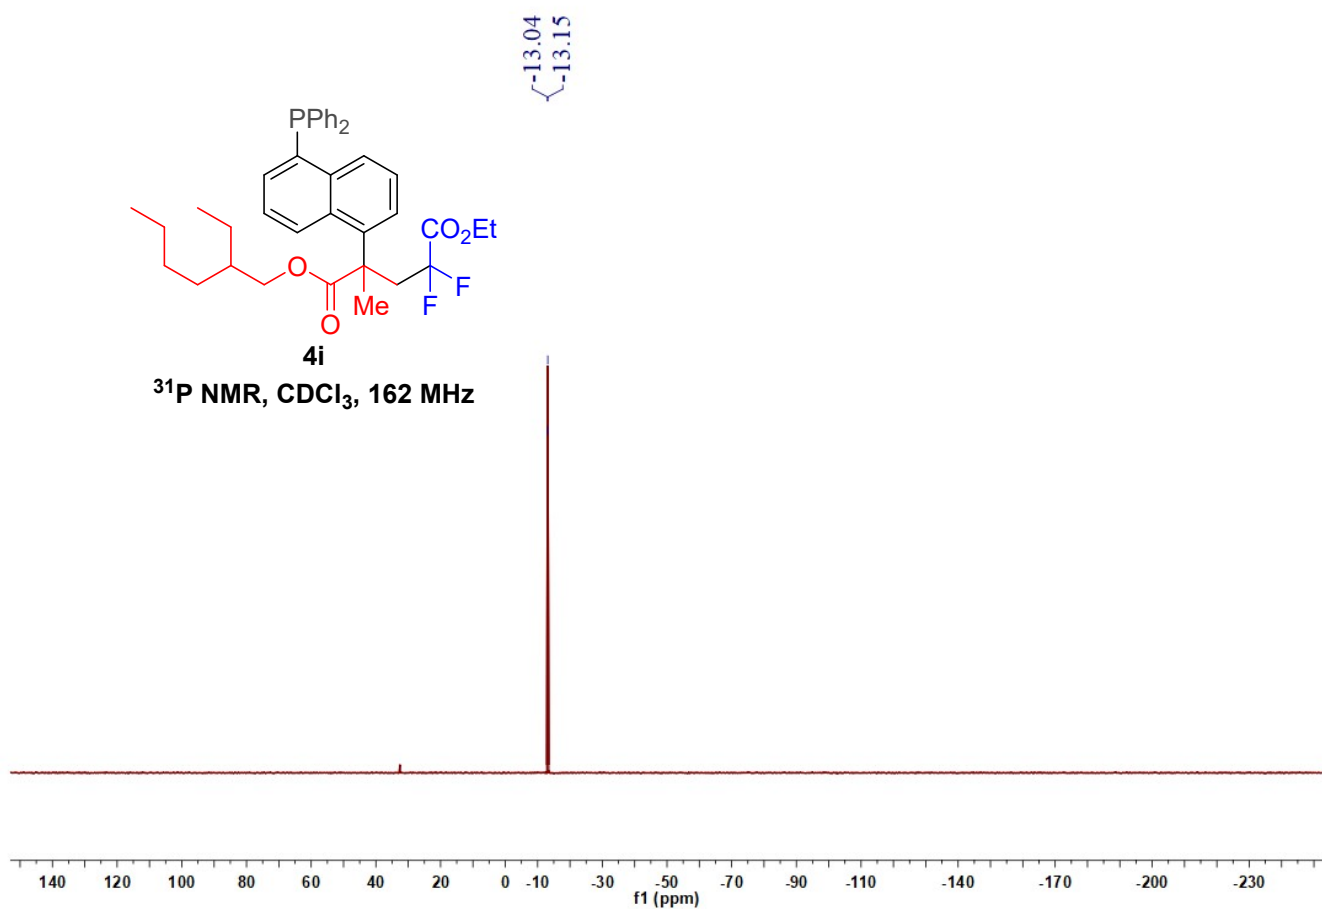

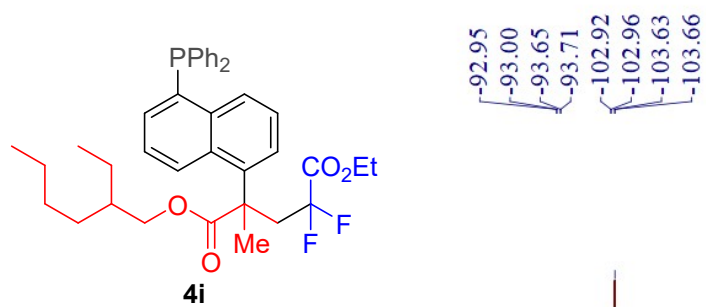

**4i**  
<sup>19</sup>F NMR, CDCl<sub>3</sub>, 377 MHz

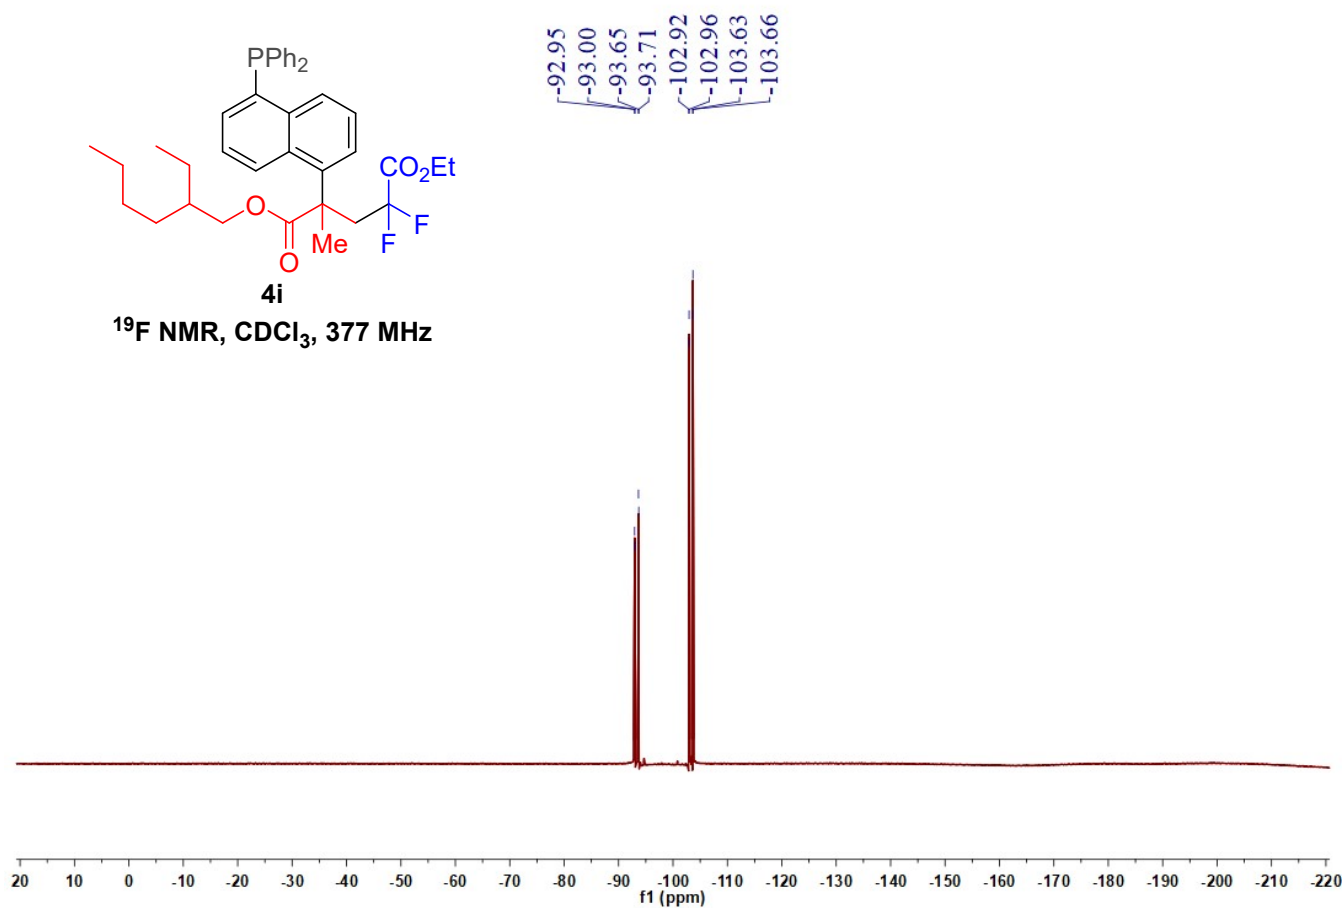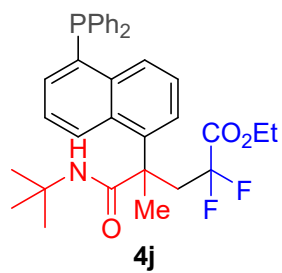

**4j**  
<sup>1</sup>H NMR, CDCl<sub>3</sub>, 400 MHz

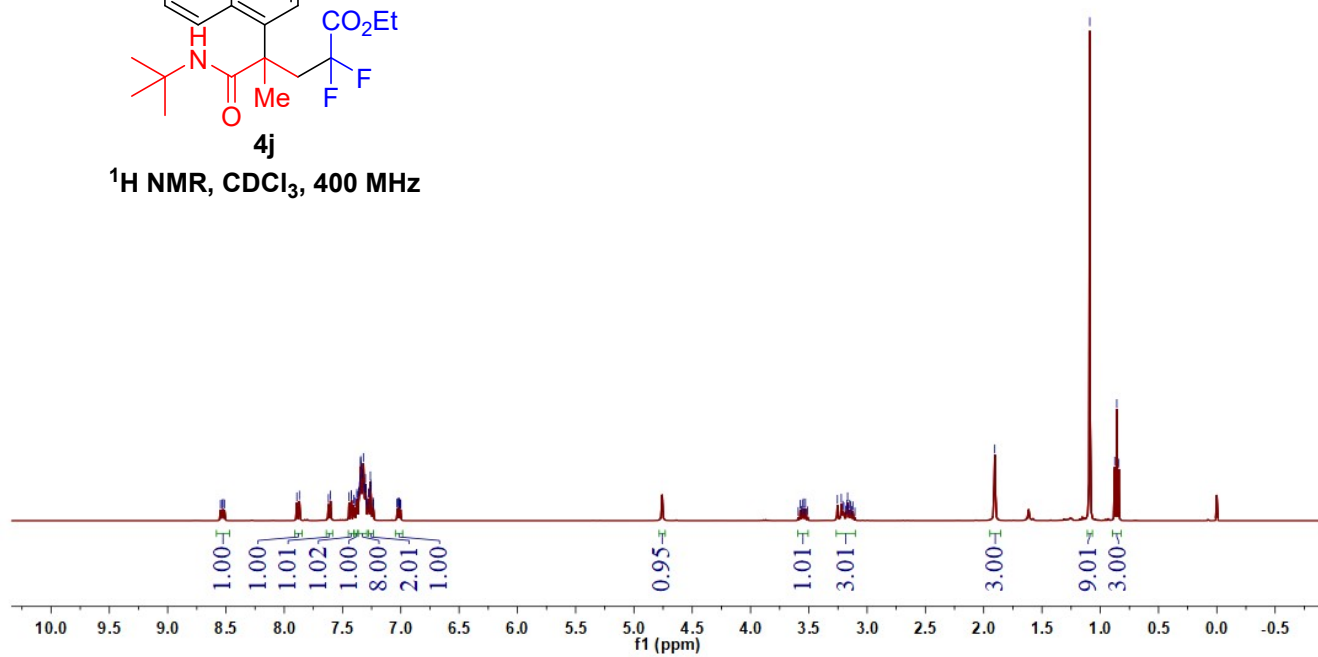



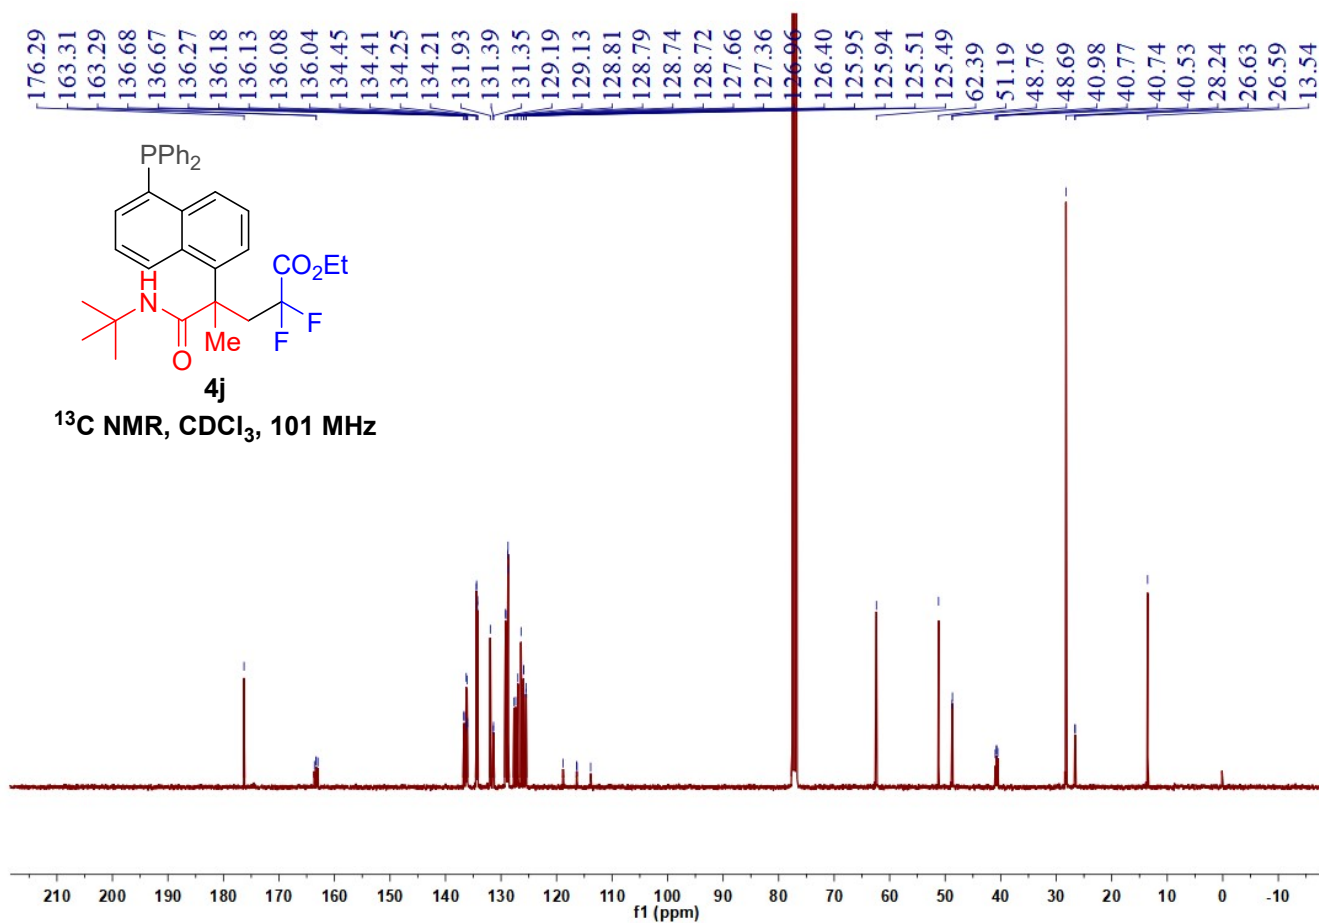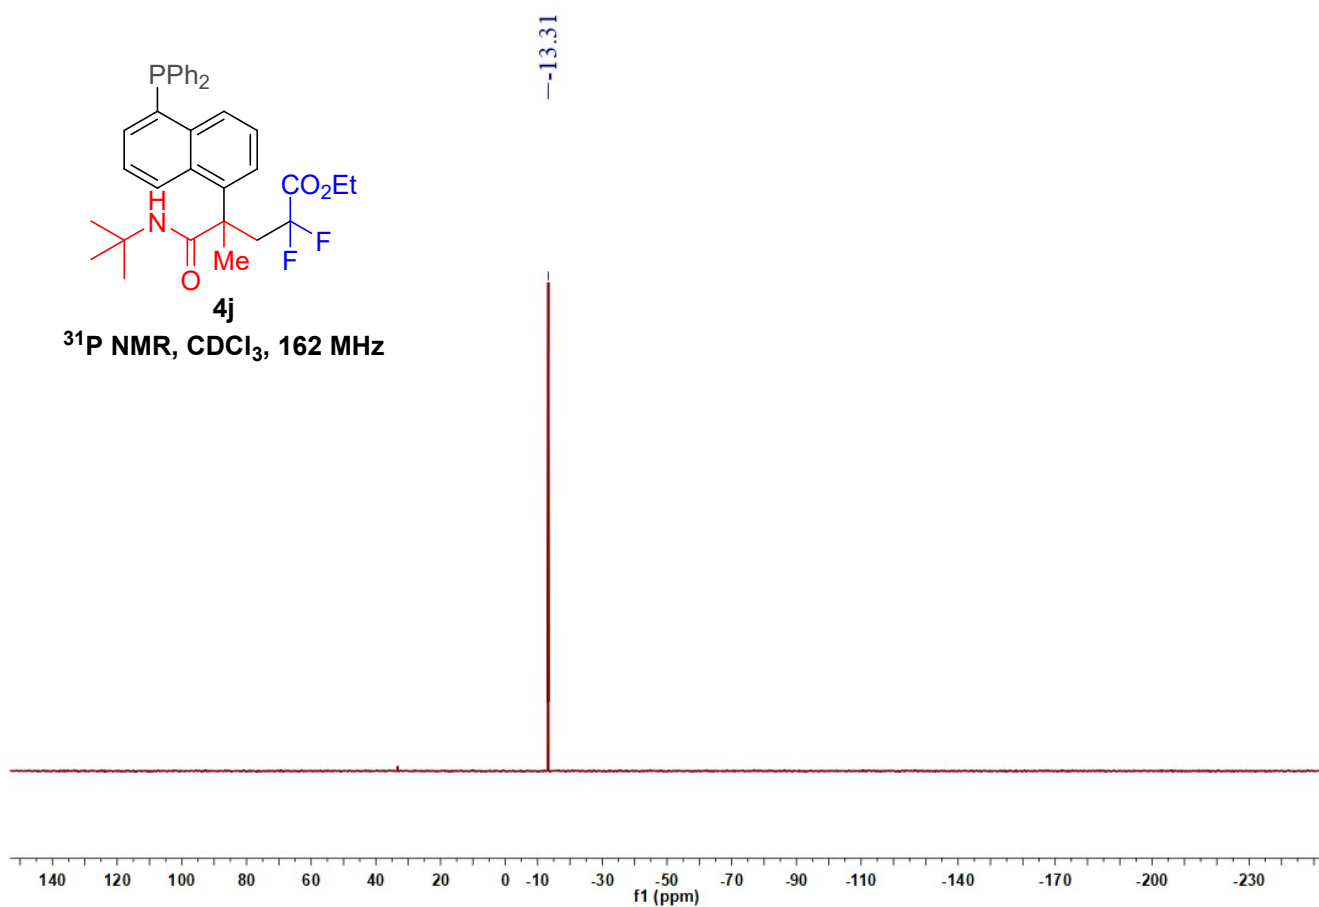

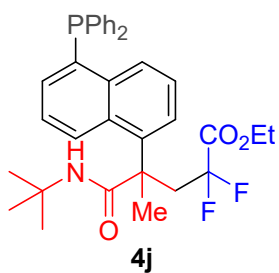

**<sup>19</sup>F NMR, CDCl<sub>3</sub>, 377 MHz**

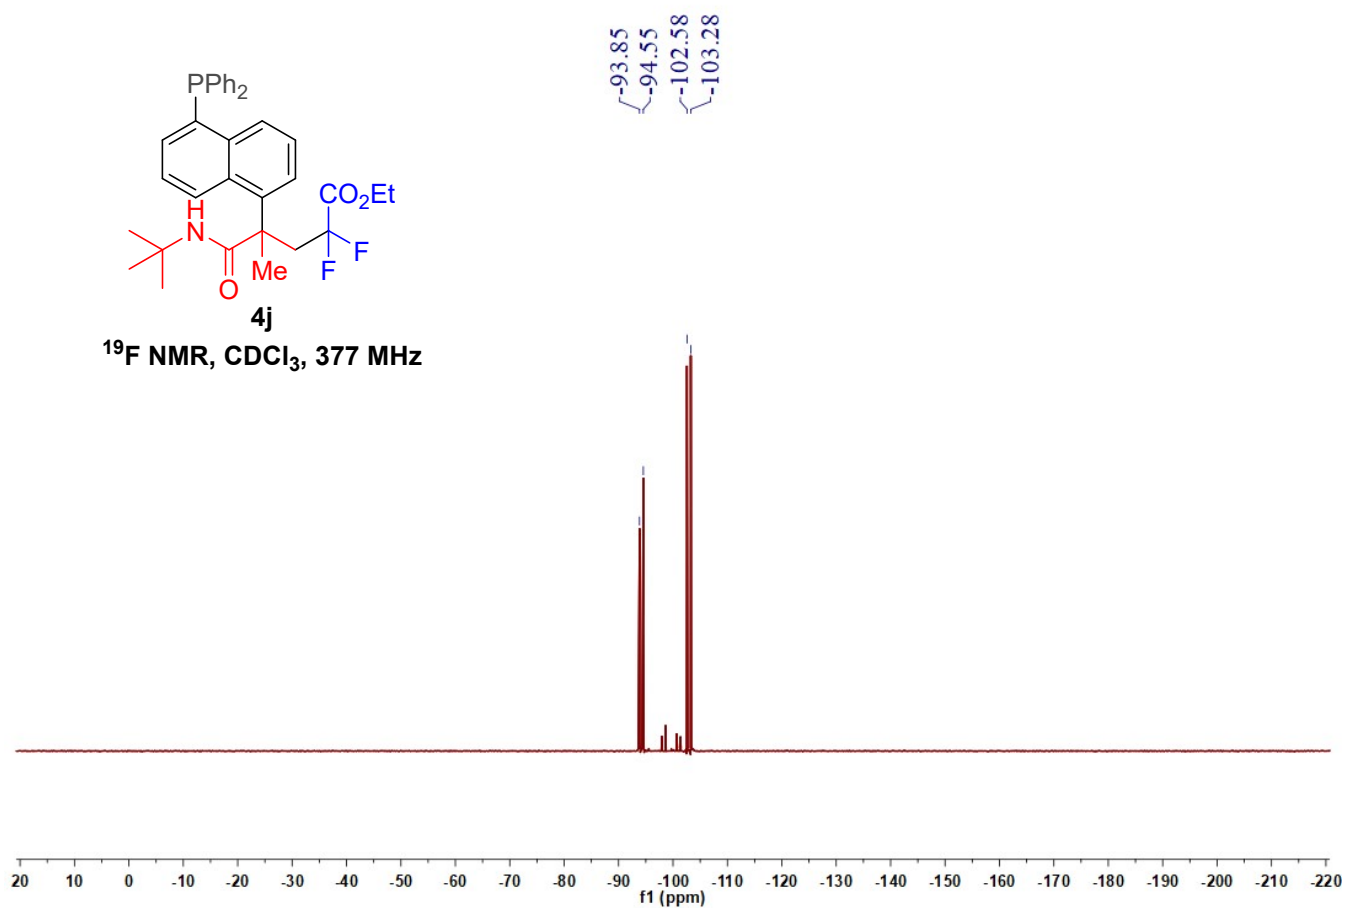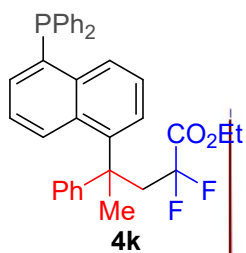

**<sup>1</sup>H NMR, CDCl<sub>3</sub>, 400 MHz**

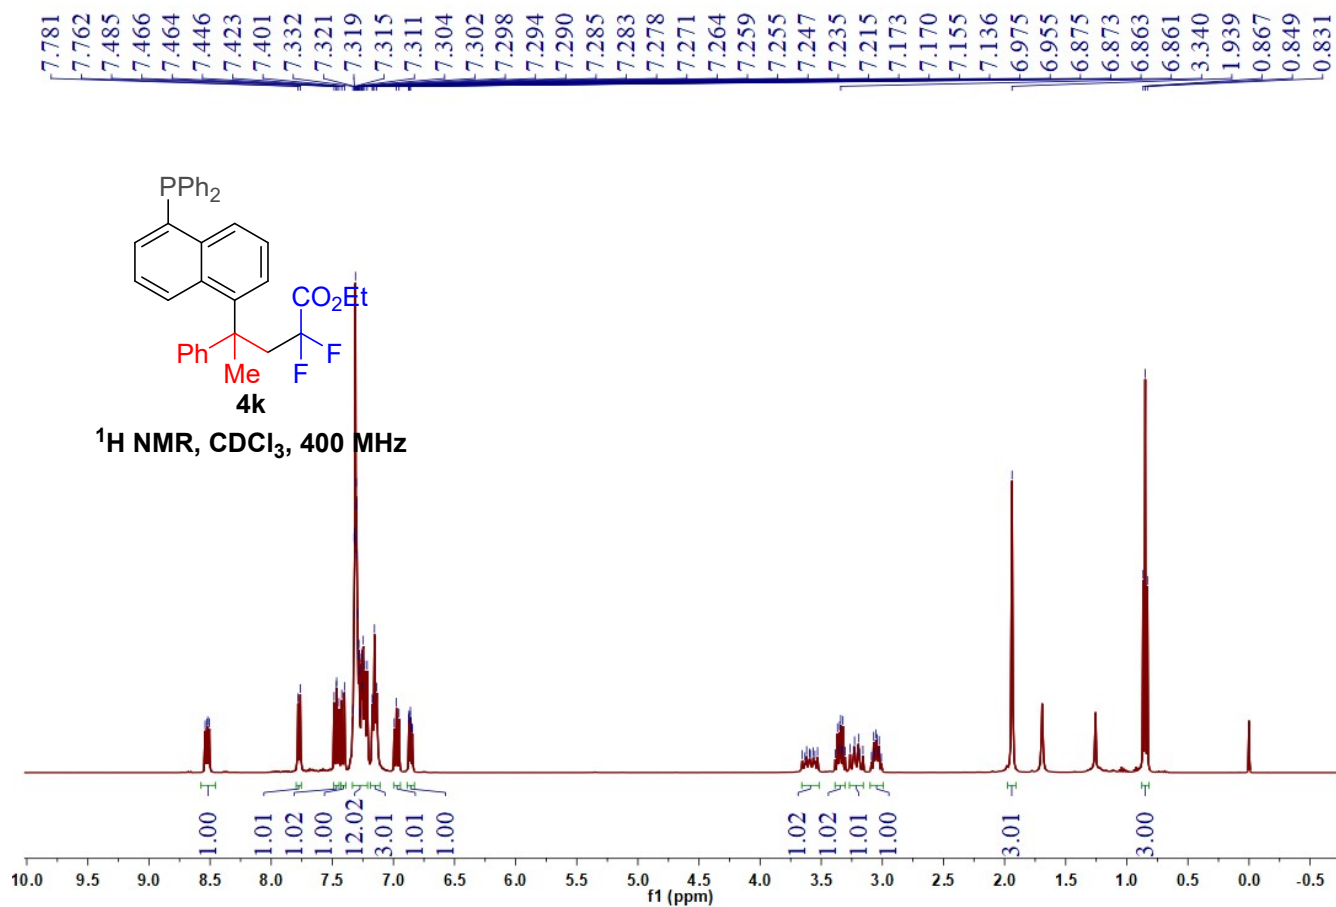

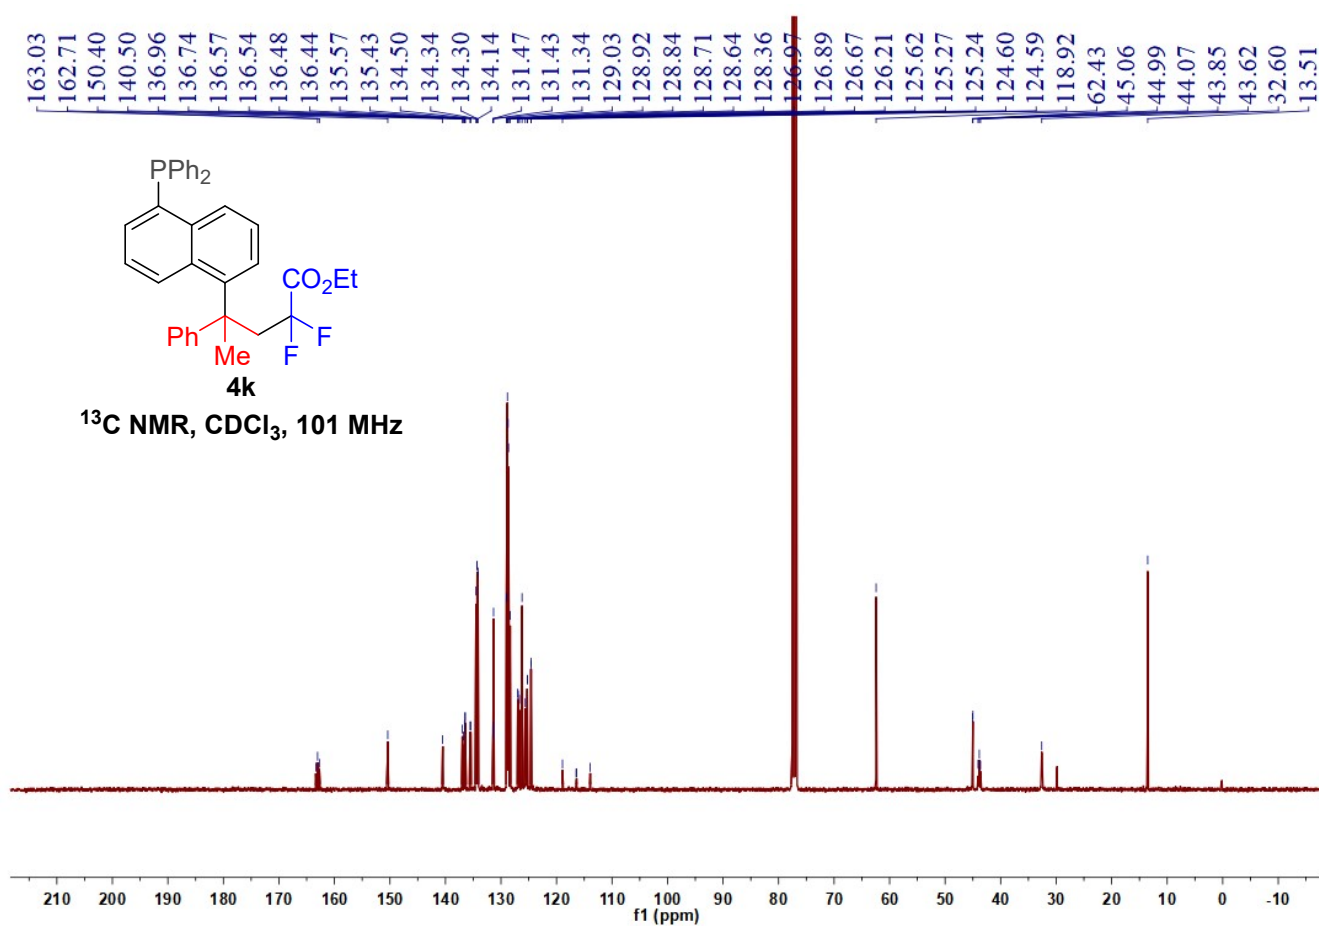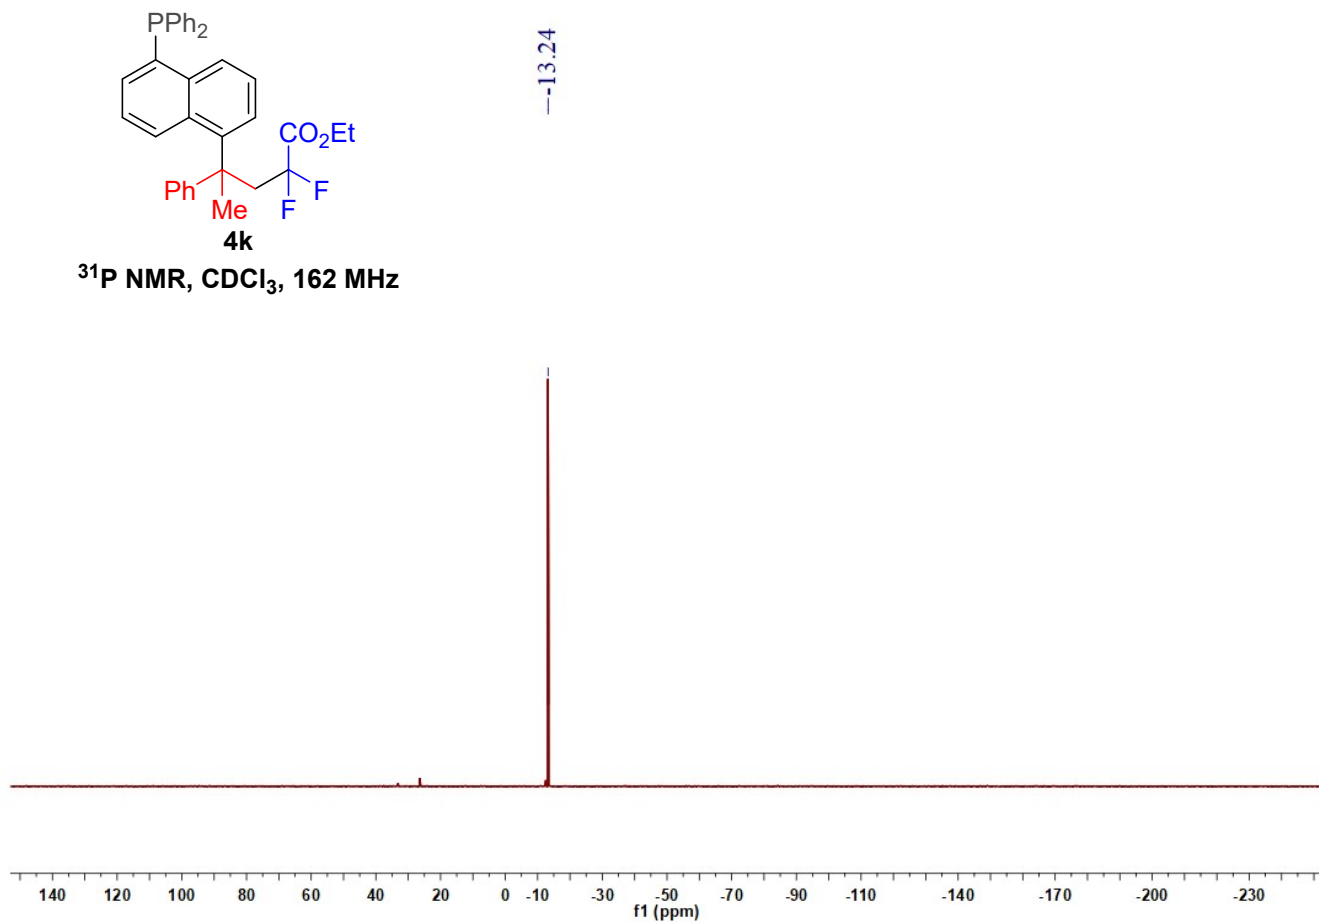

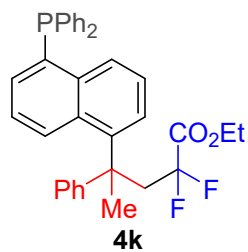

$^{19}\text{F}$  NMR,  $\text{CDCl}_3$ , 377 MHz

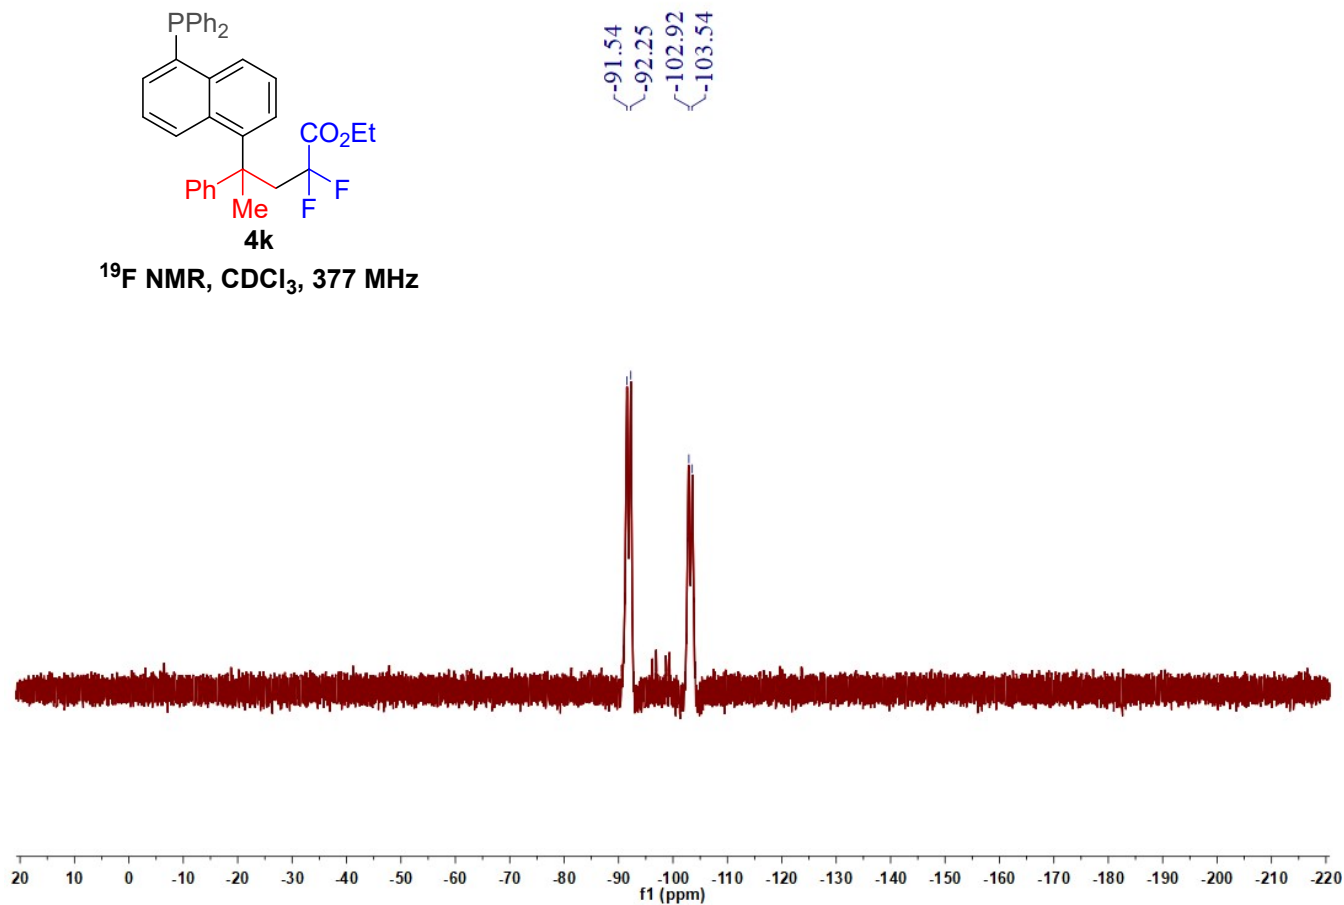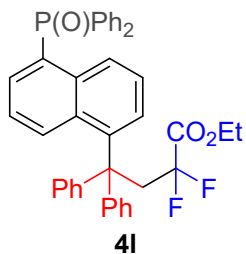

$^1\text{H}$  NMR,  $\text{CDCl}_3$ , 400 MHz

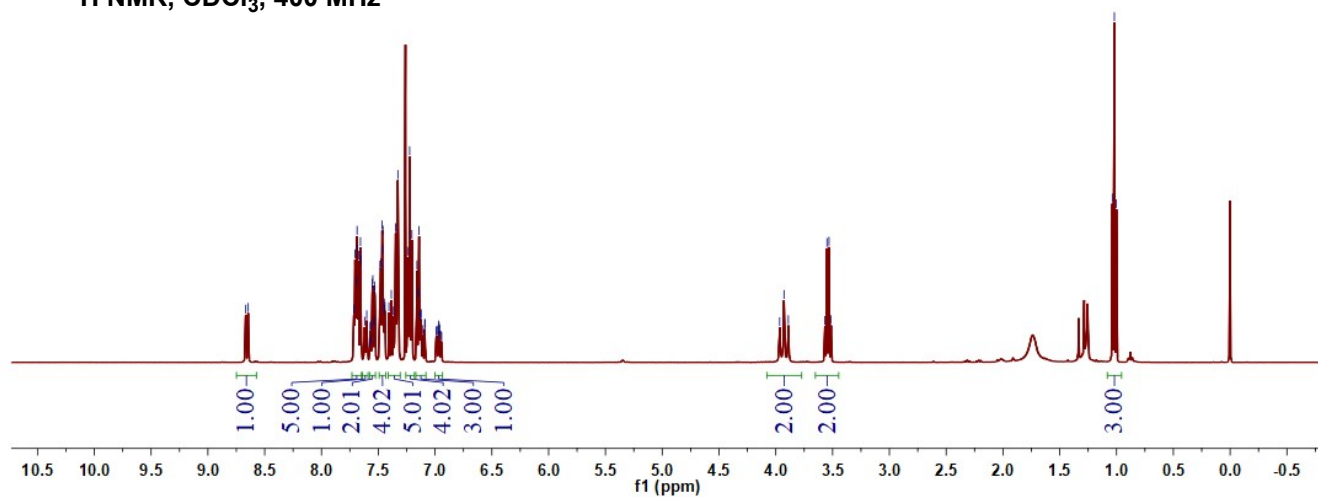

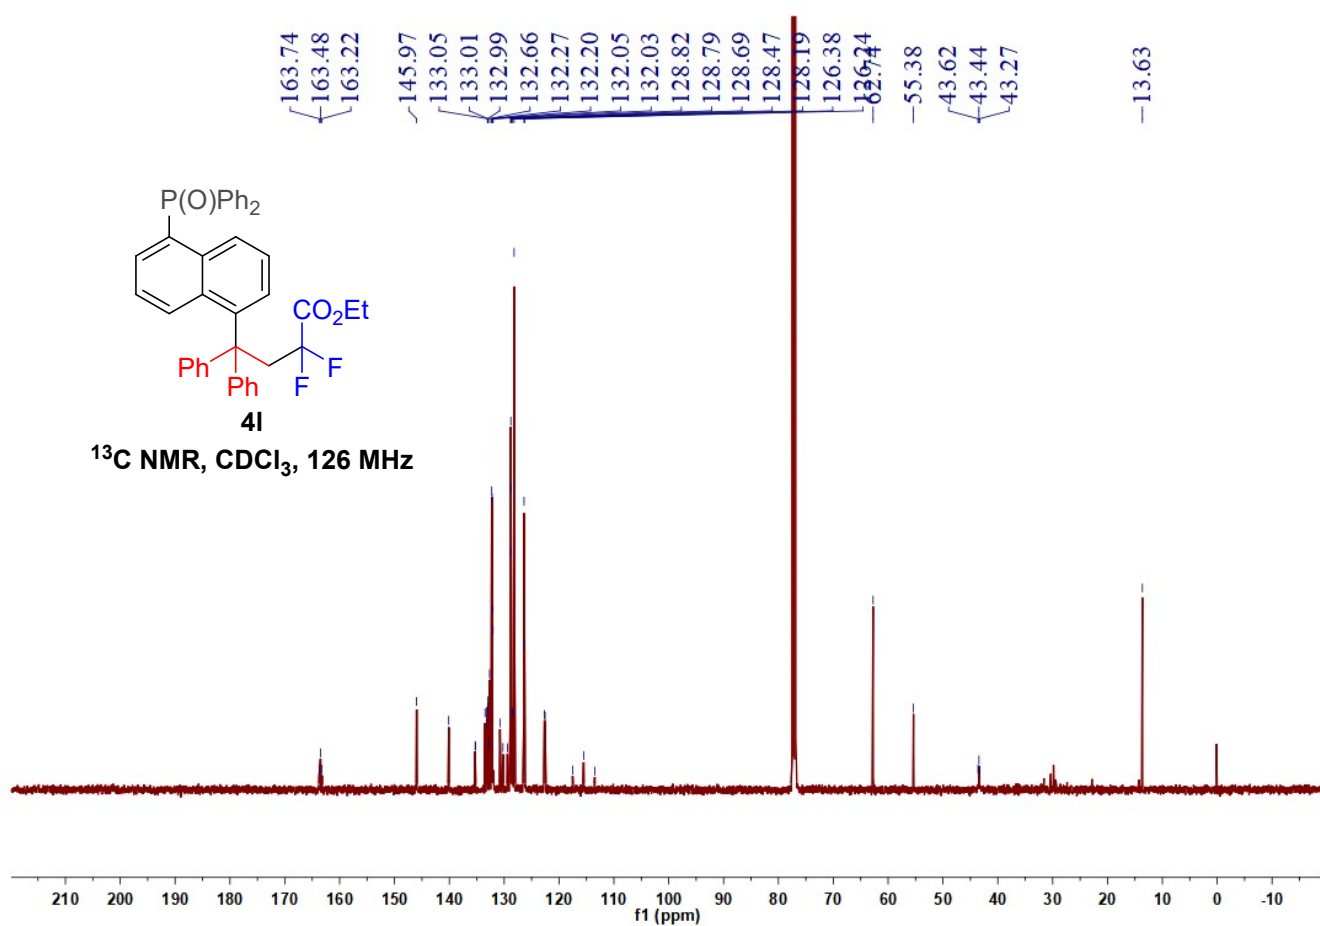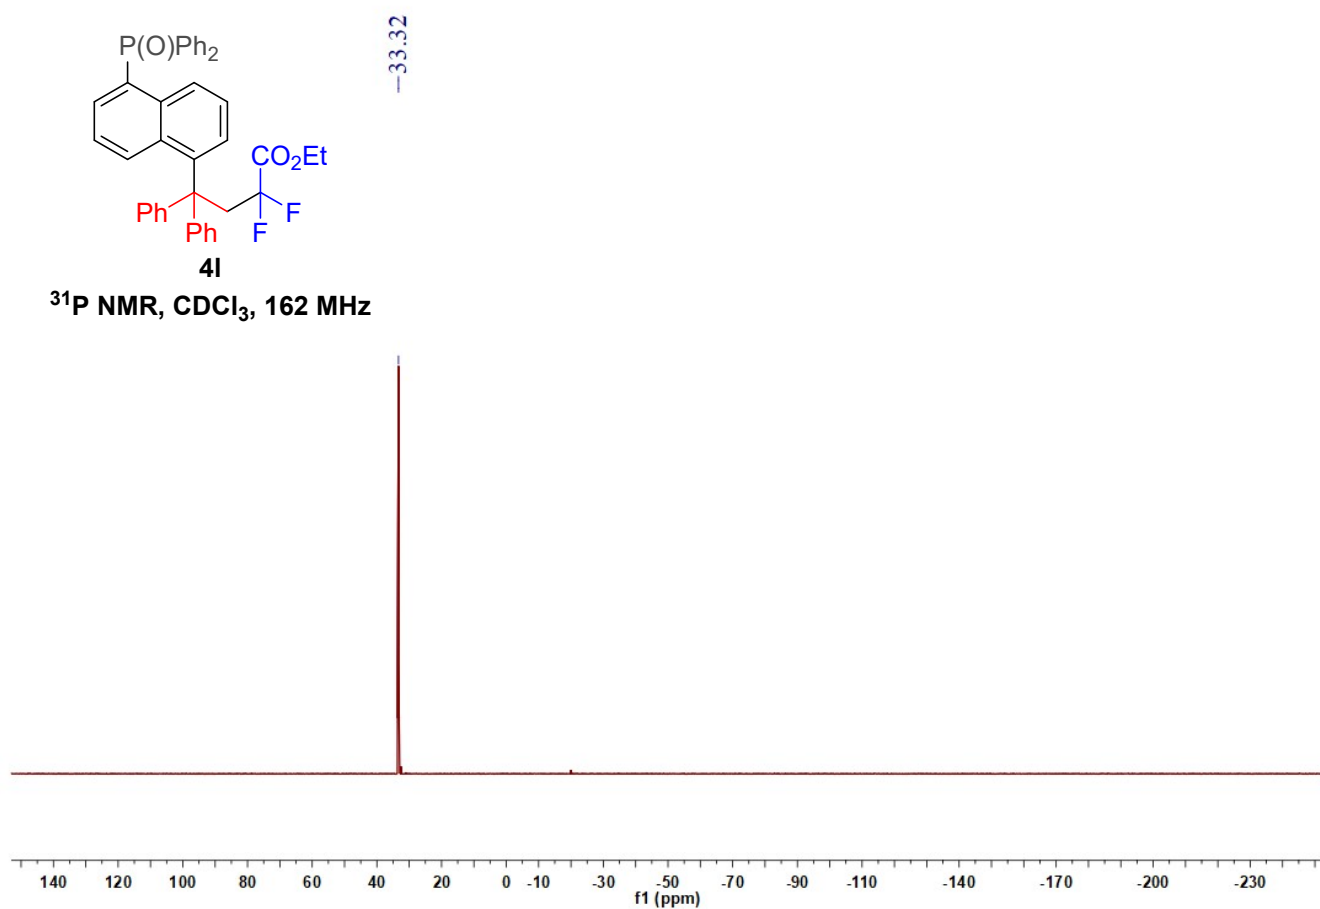

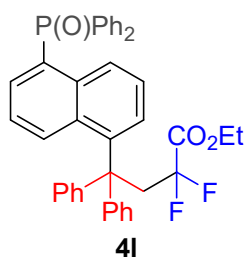

$^{19}\text{F}$  NMR,  $\text{CDCl}_3$ , 377 MHz

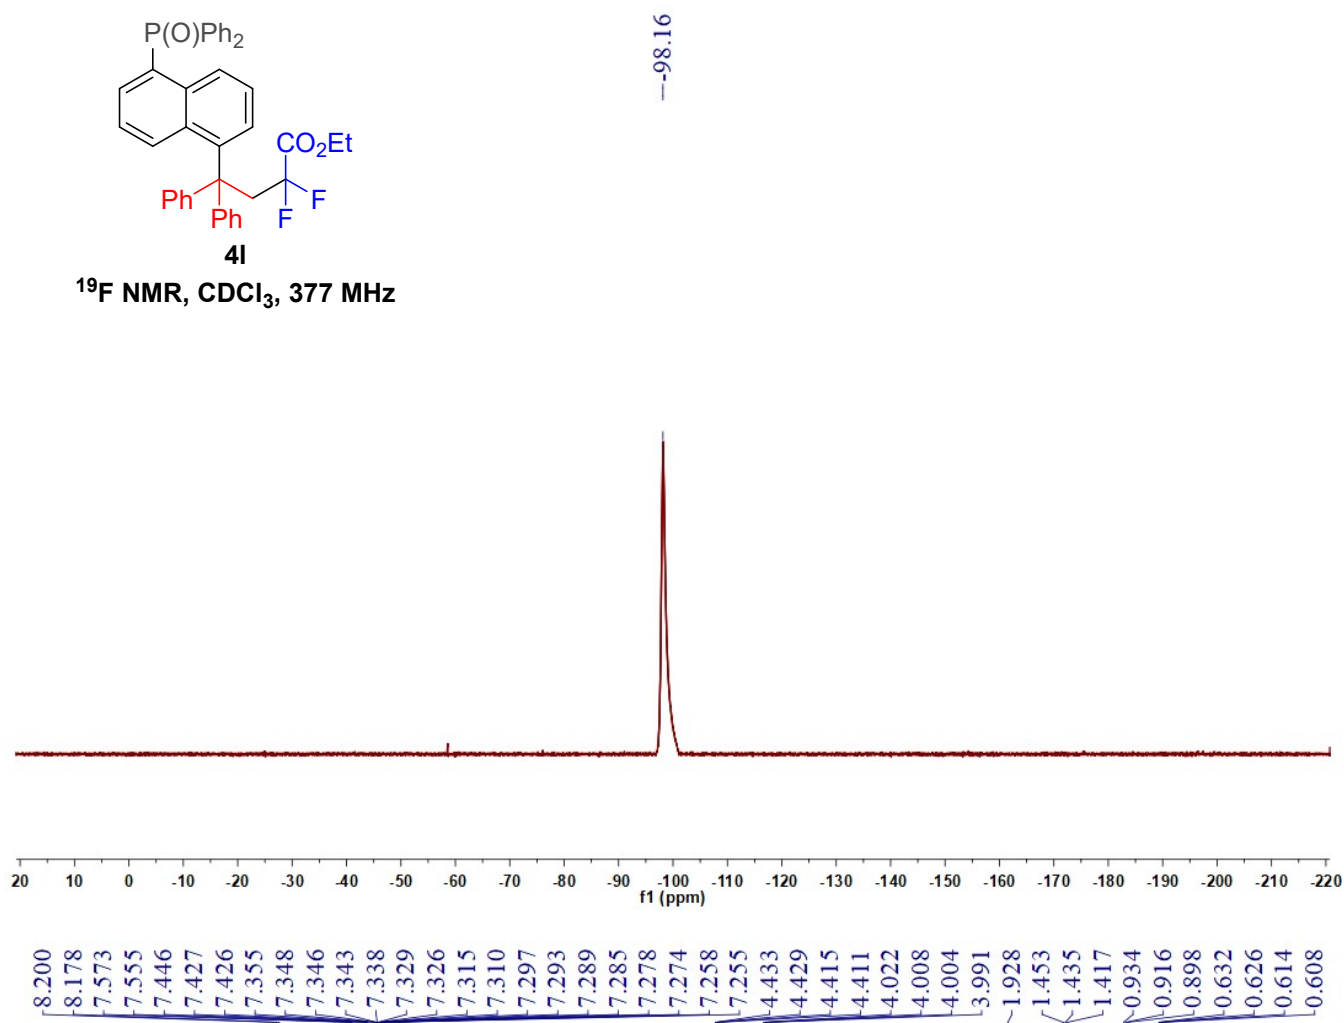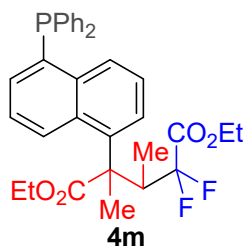

$^1\text{H}$  NMR,  $\text{CDCl}_3$ , 400 MHz

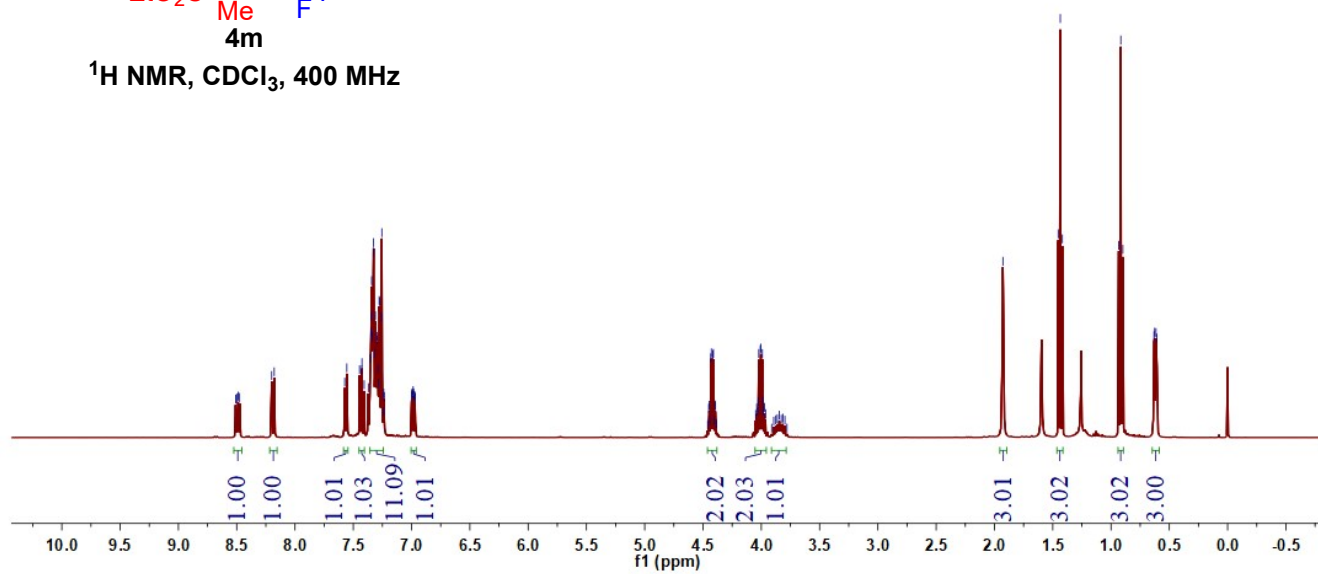

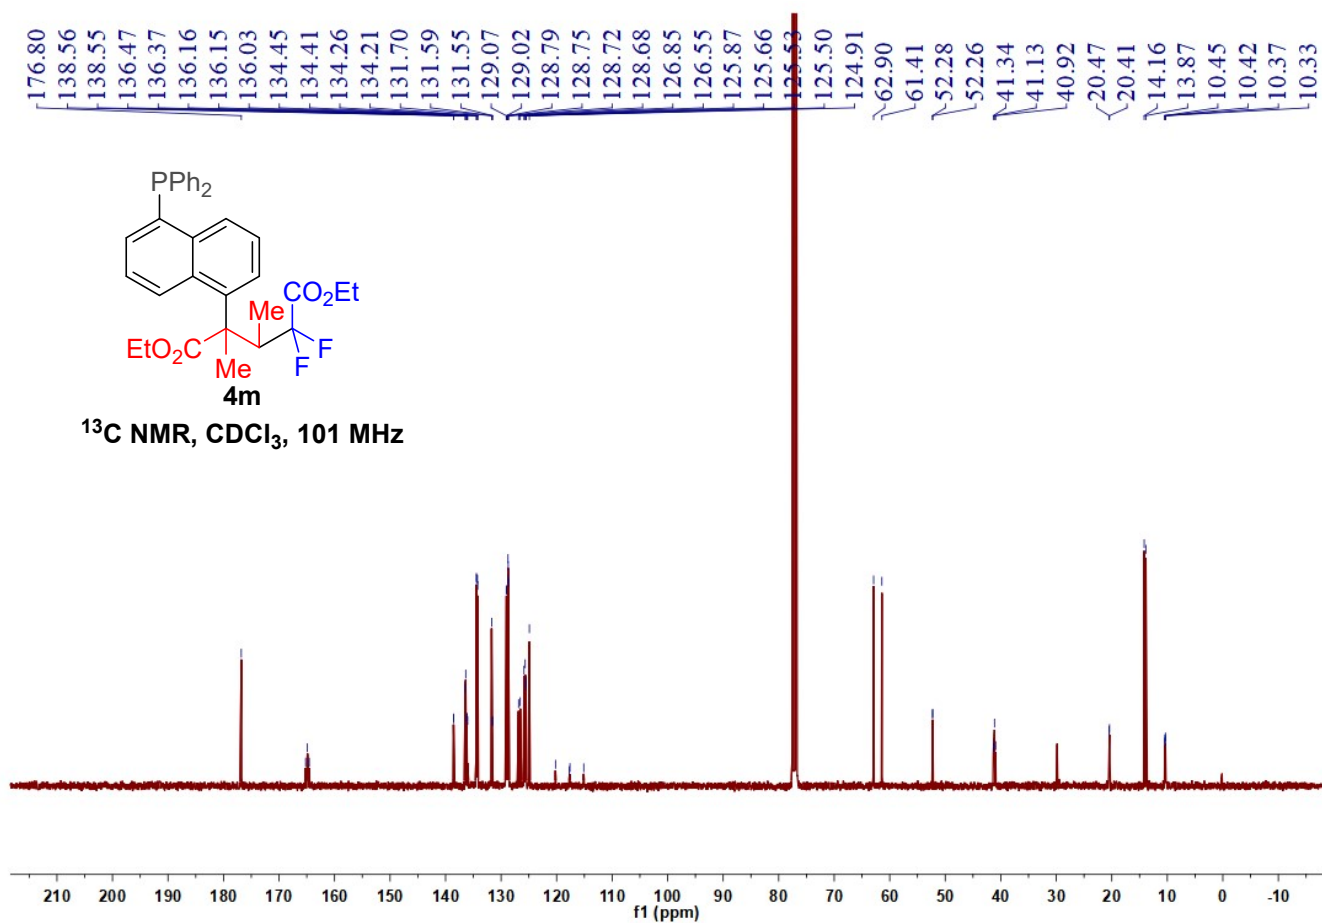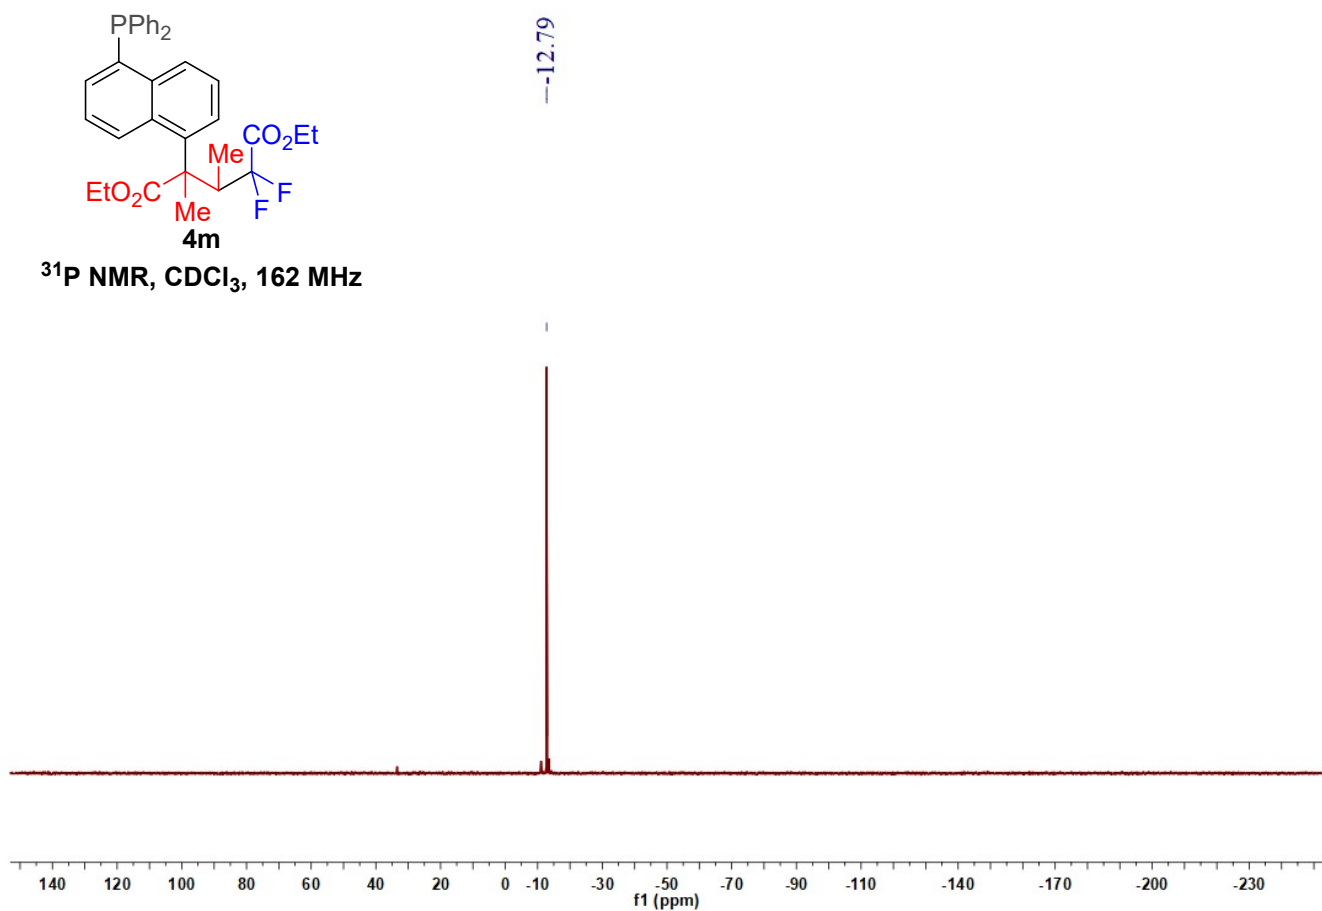



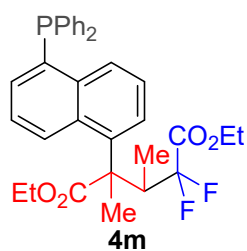

**<sup>19</sup>F NMR, CDCl<sub>3</sub>, 377 MHz**

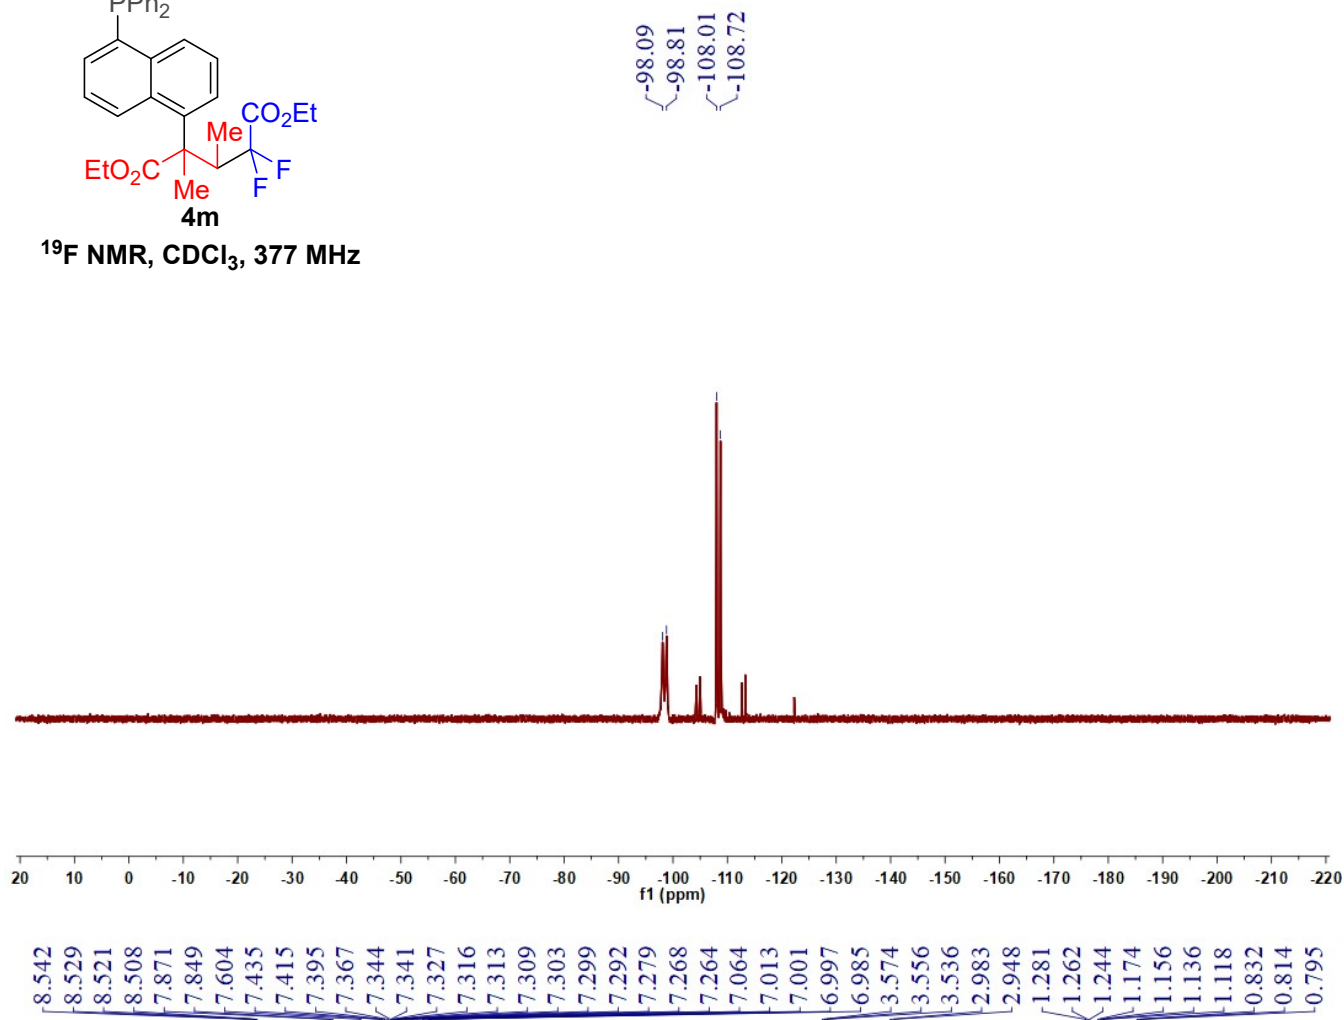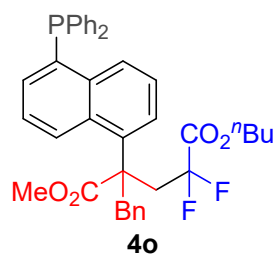

**<sup>1</sup>H NMR, CDCl<sub>3</sub>, 400 MHz**

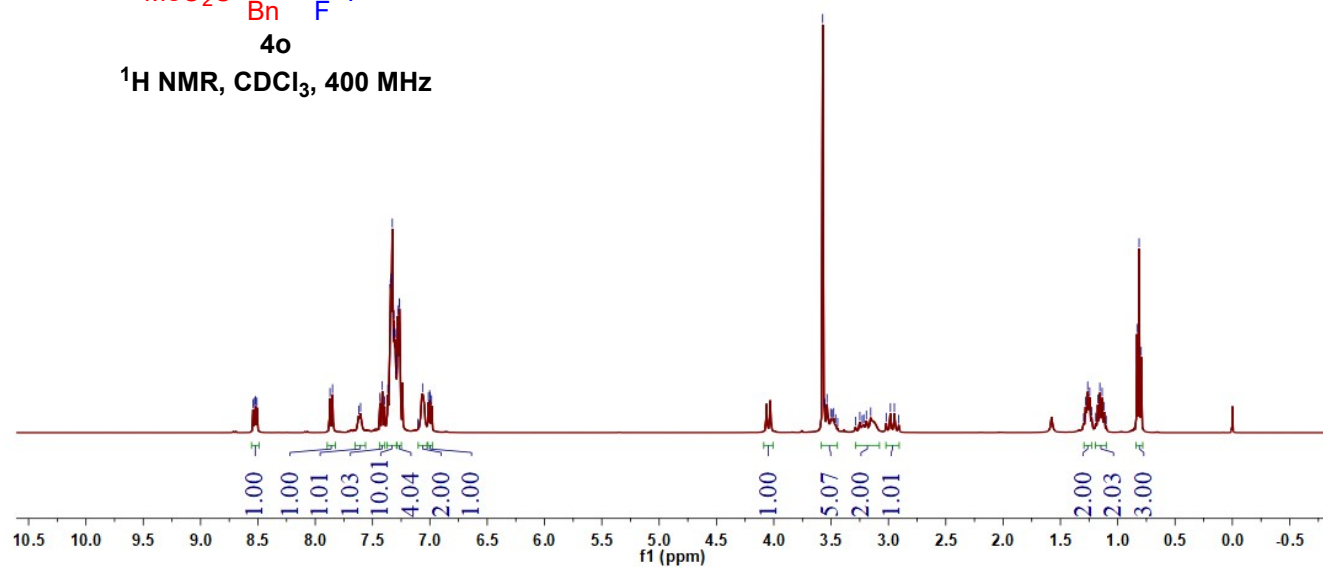

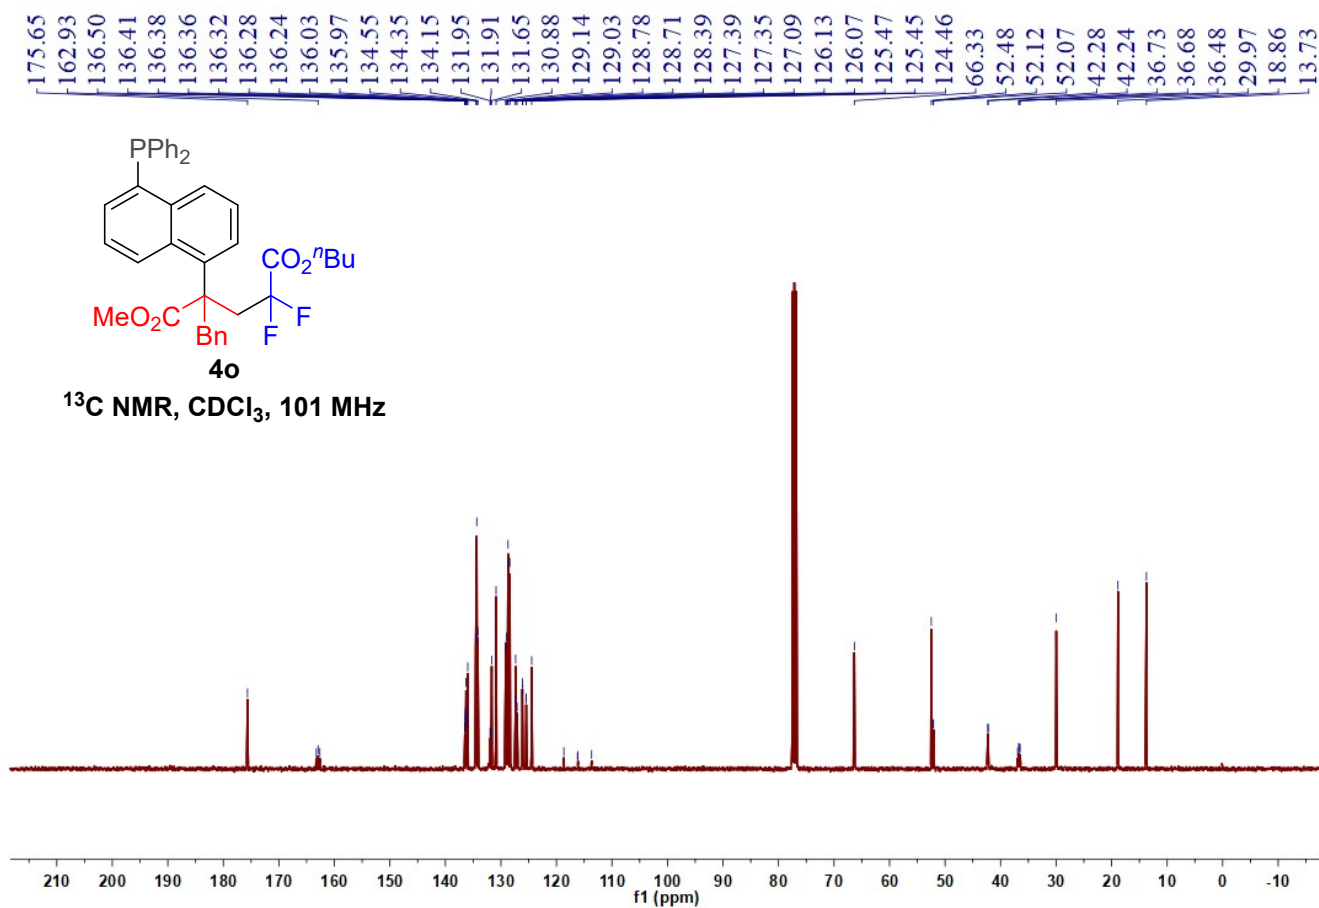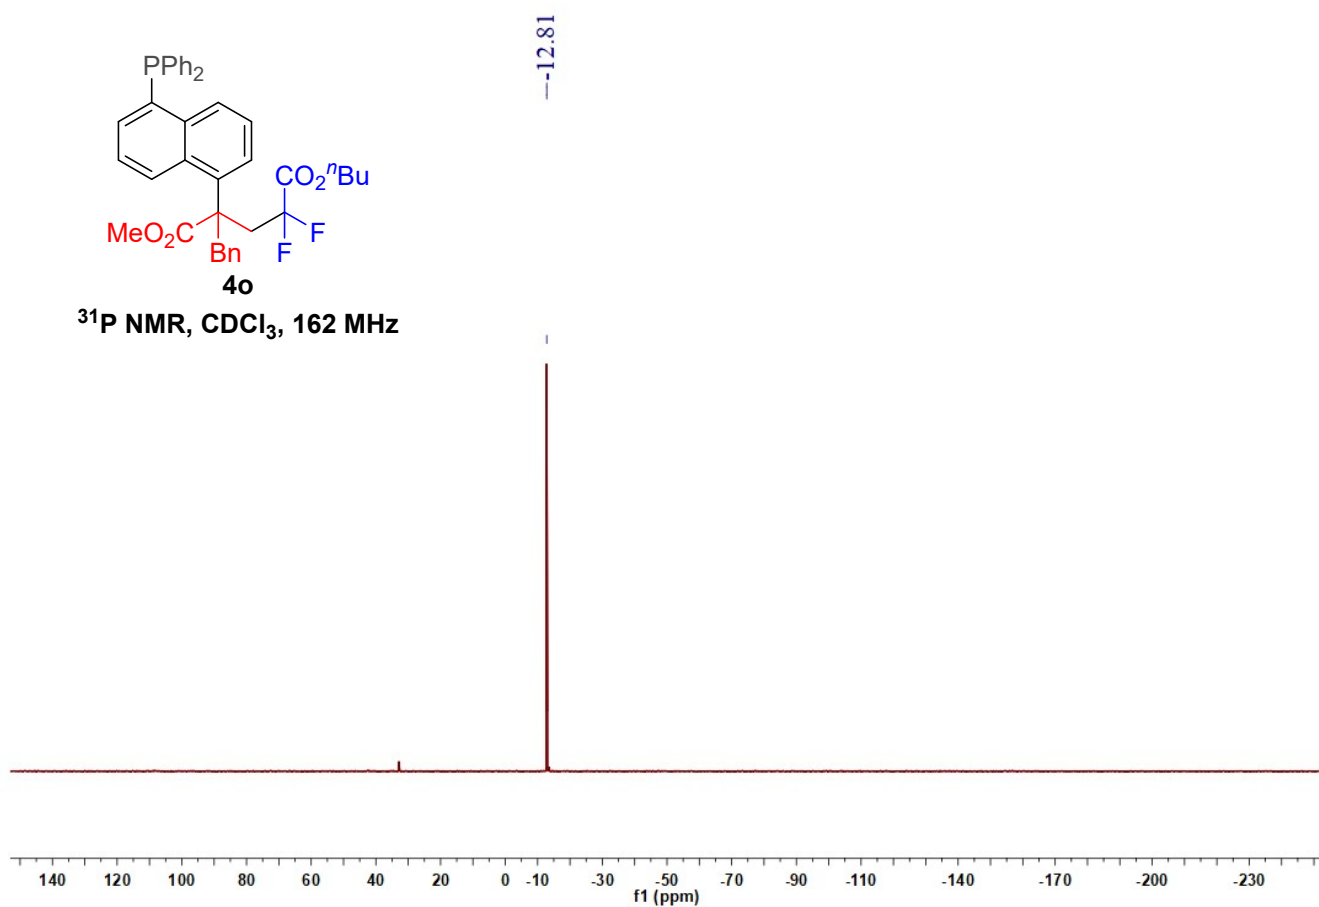

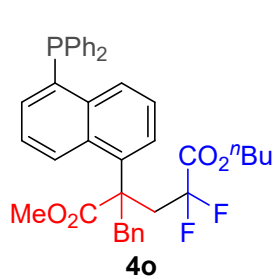

<sup>19</sup>F NMR, CDCl<sub>3</sub>, 377 MHz

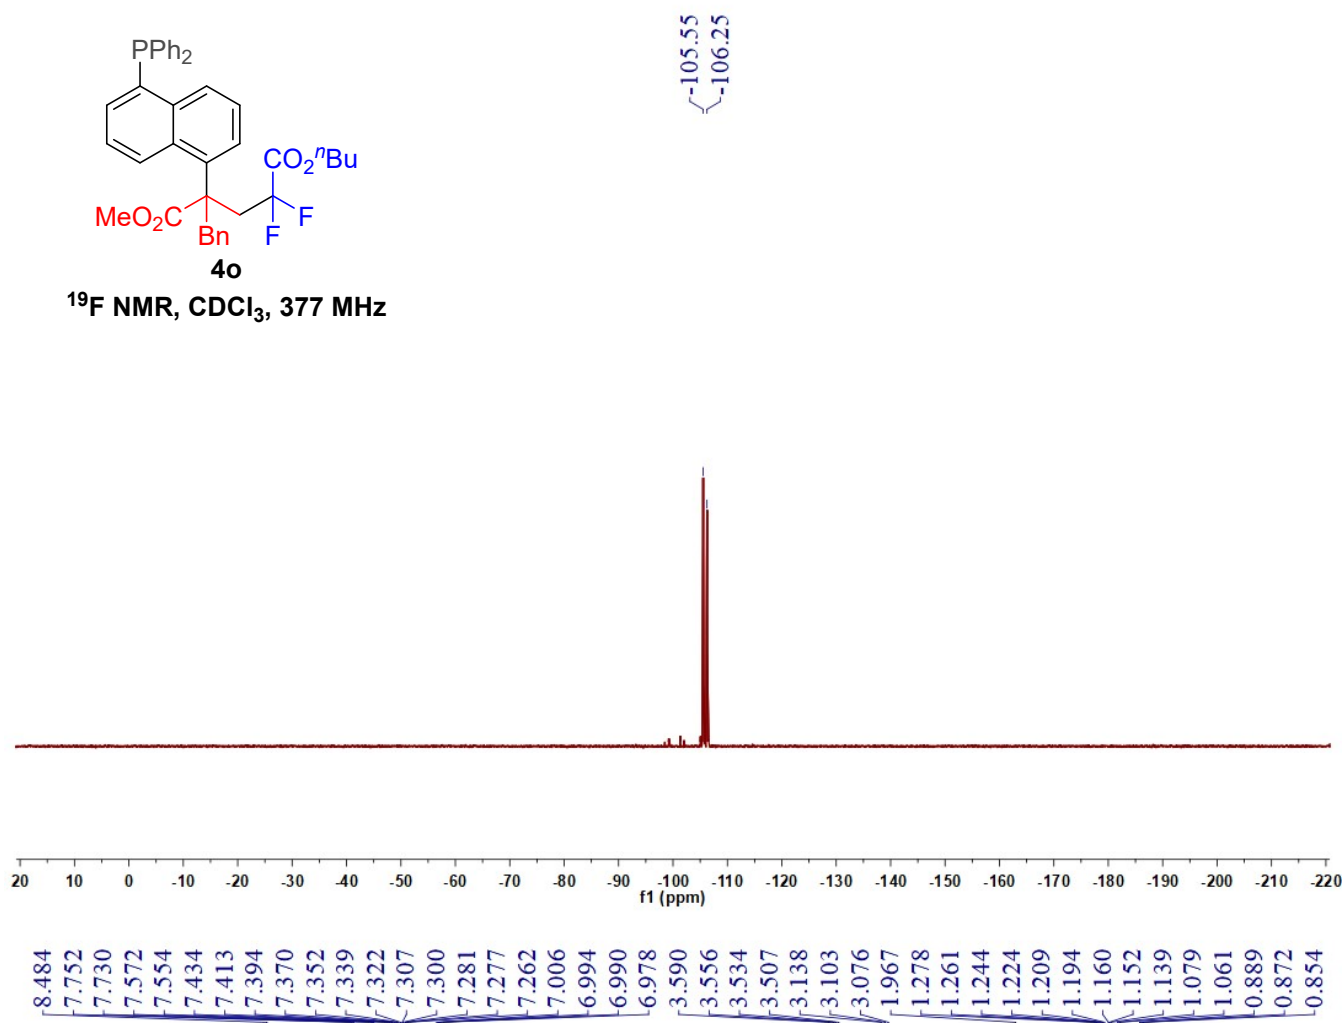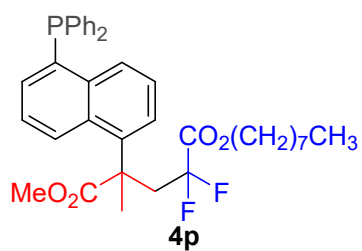

<sup>1</sup>H NMR, CDCl<sub>3</sub>, 400 MHz

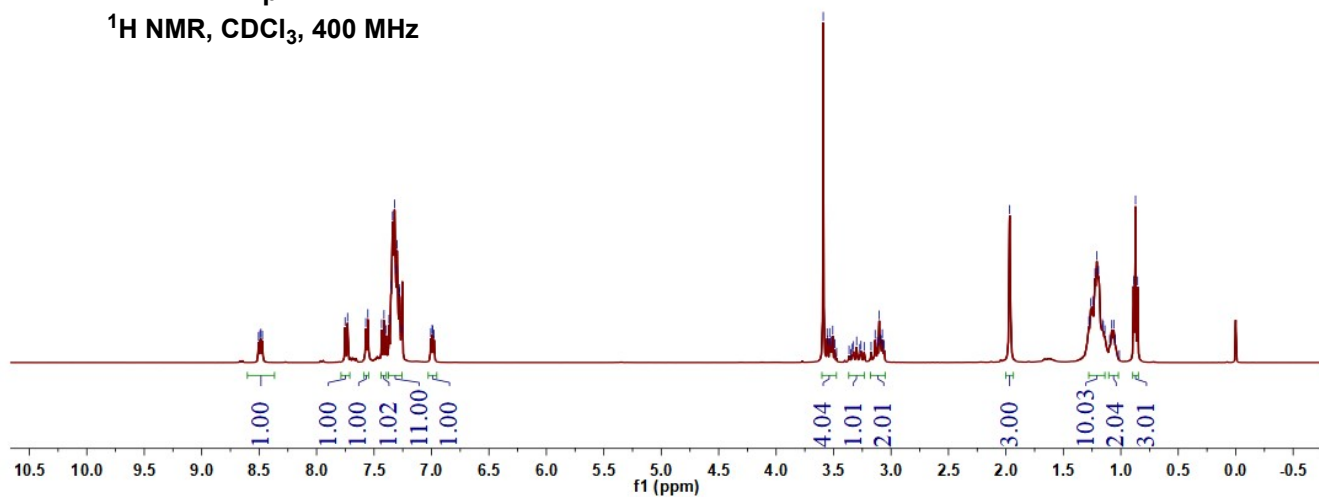

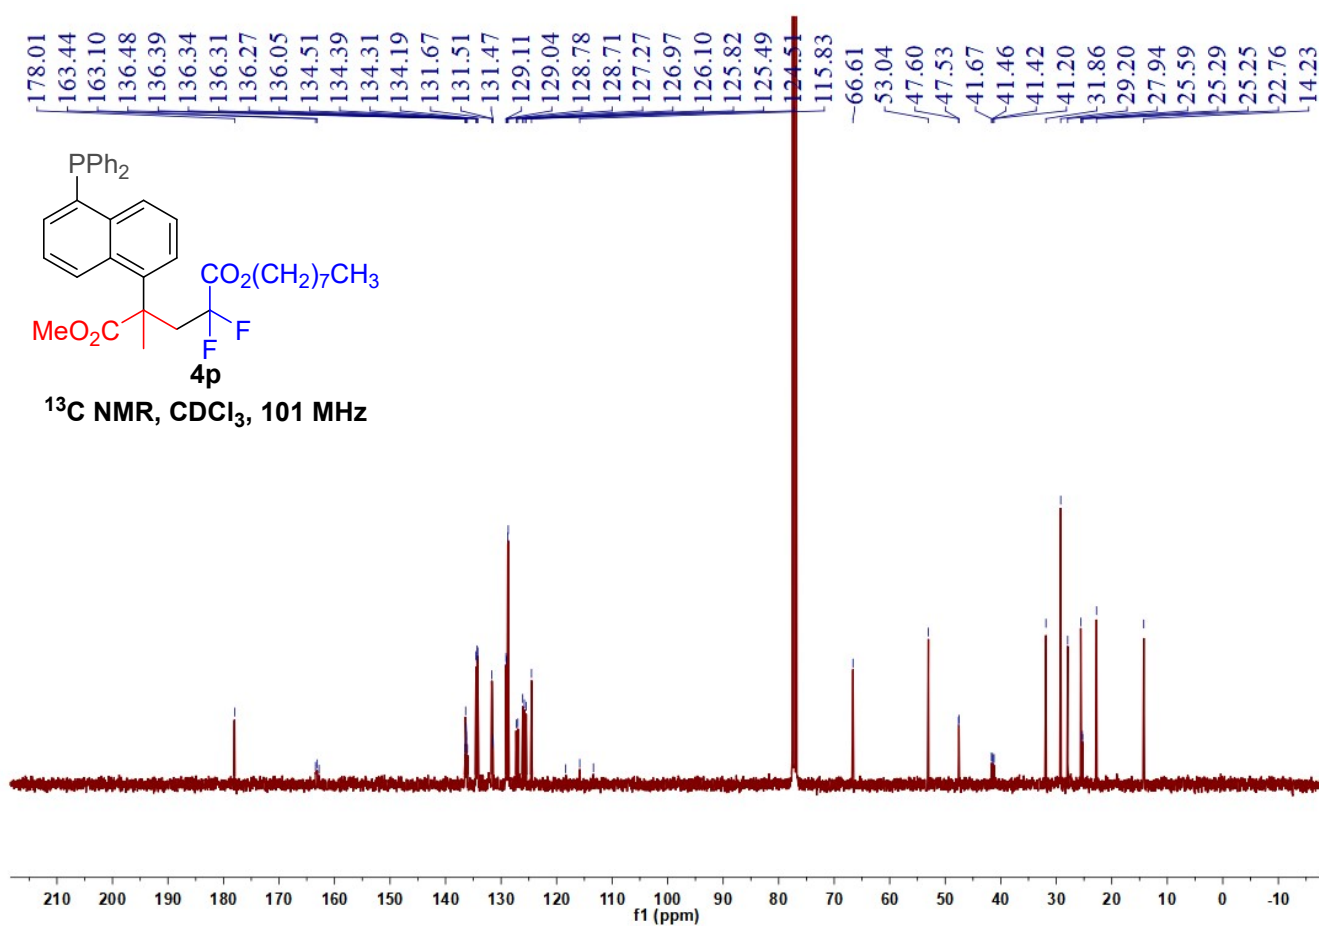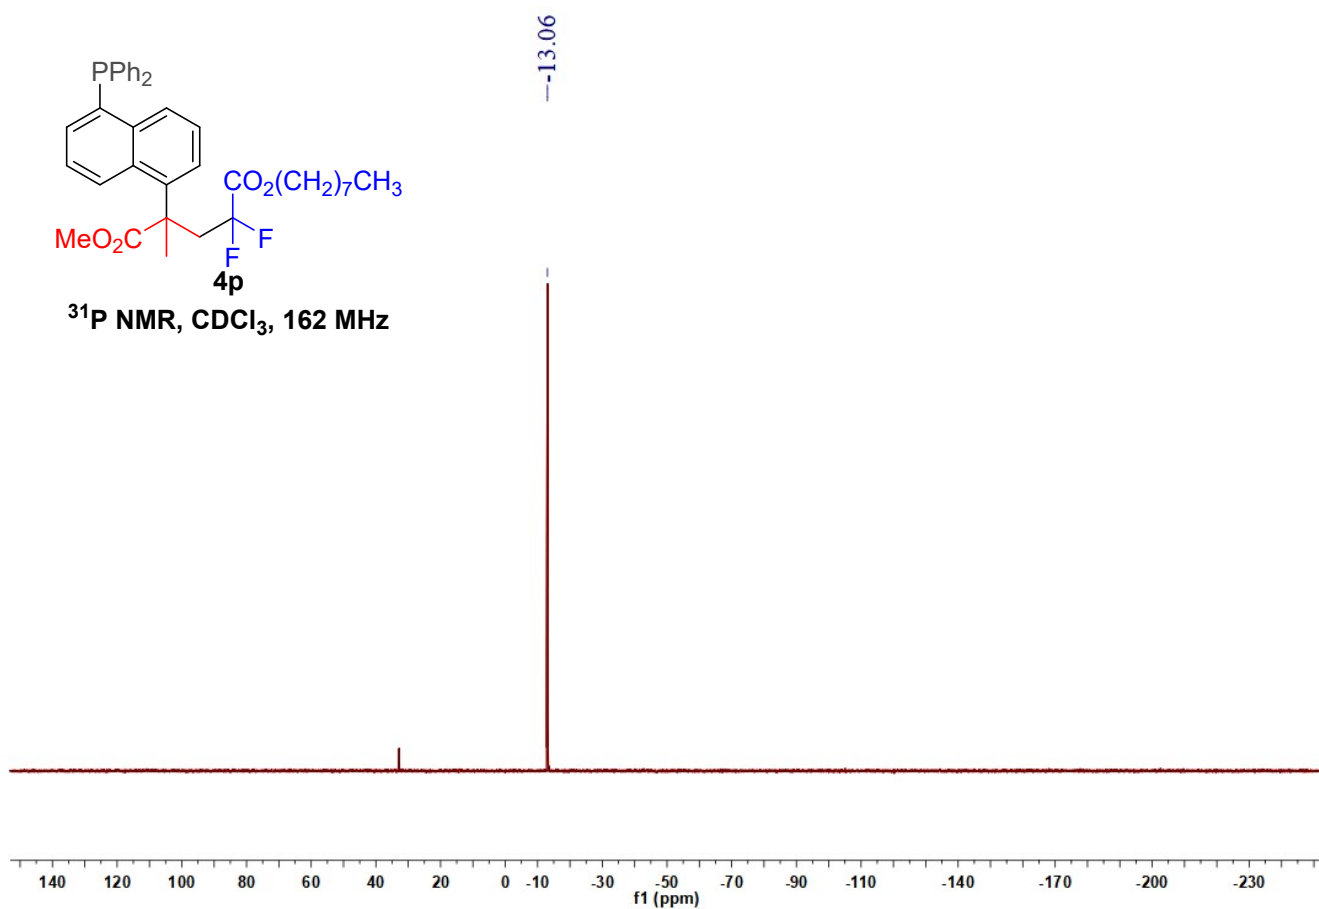

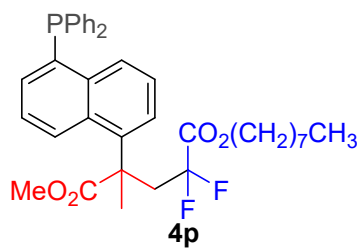

<sup>19</sup>F NMR, CDCl<sub>3</sub>, 377 MHz

-93.39  
 -93.42  
 -93.46  
 -94.10  
 -94.13  
 -94.16  
 -103.01  
 -103.05  
 -103.08  
 -103.12  
 -103.72  
 -103.76  
 -103.79  
 -103.83

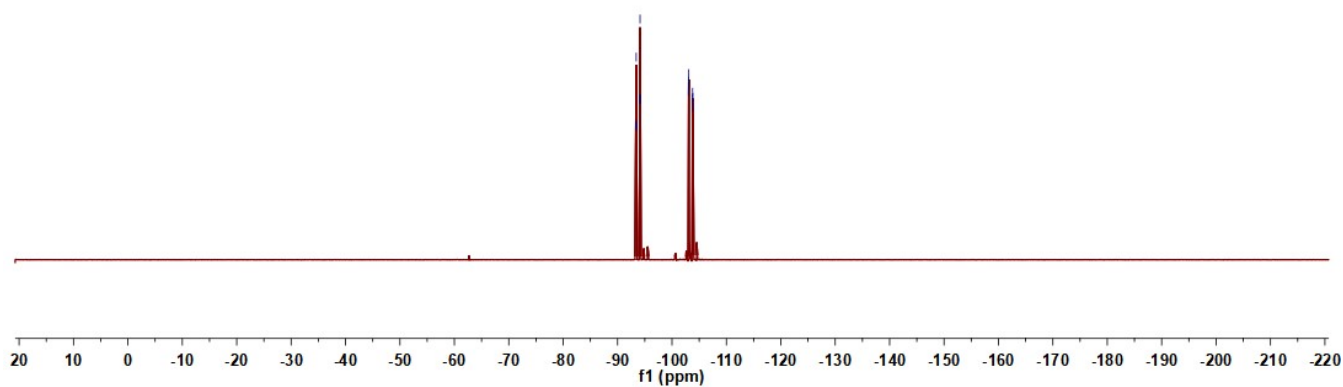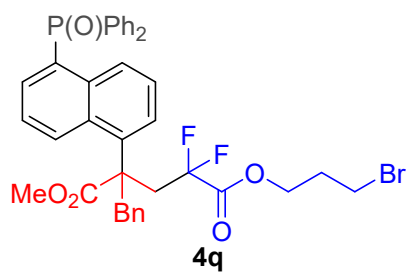

<sup>1</sup>H NMR, CDCl<sub>3</sub>, 400 MHz

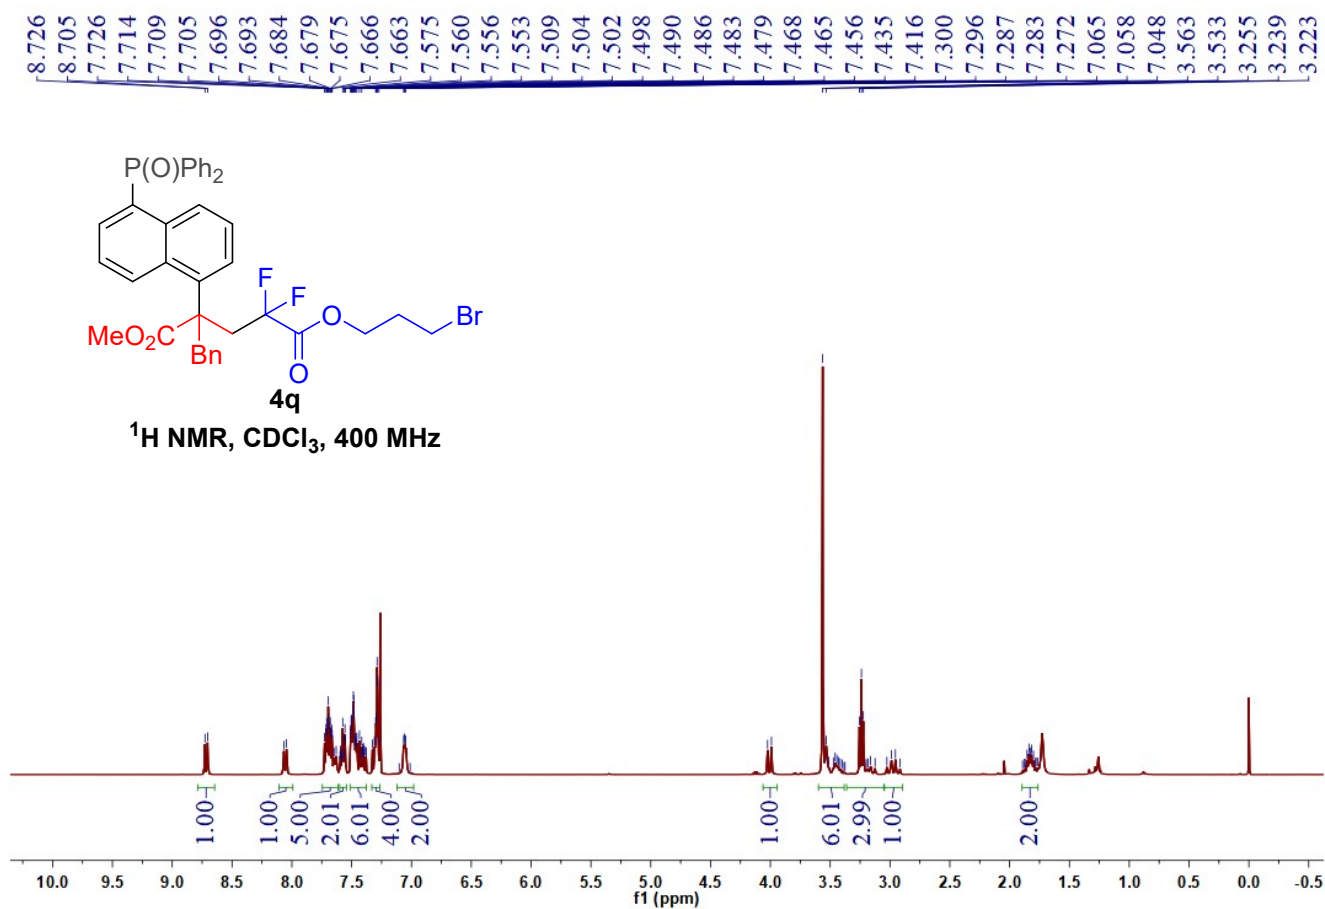

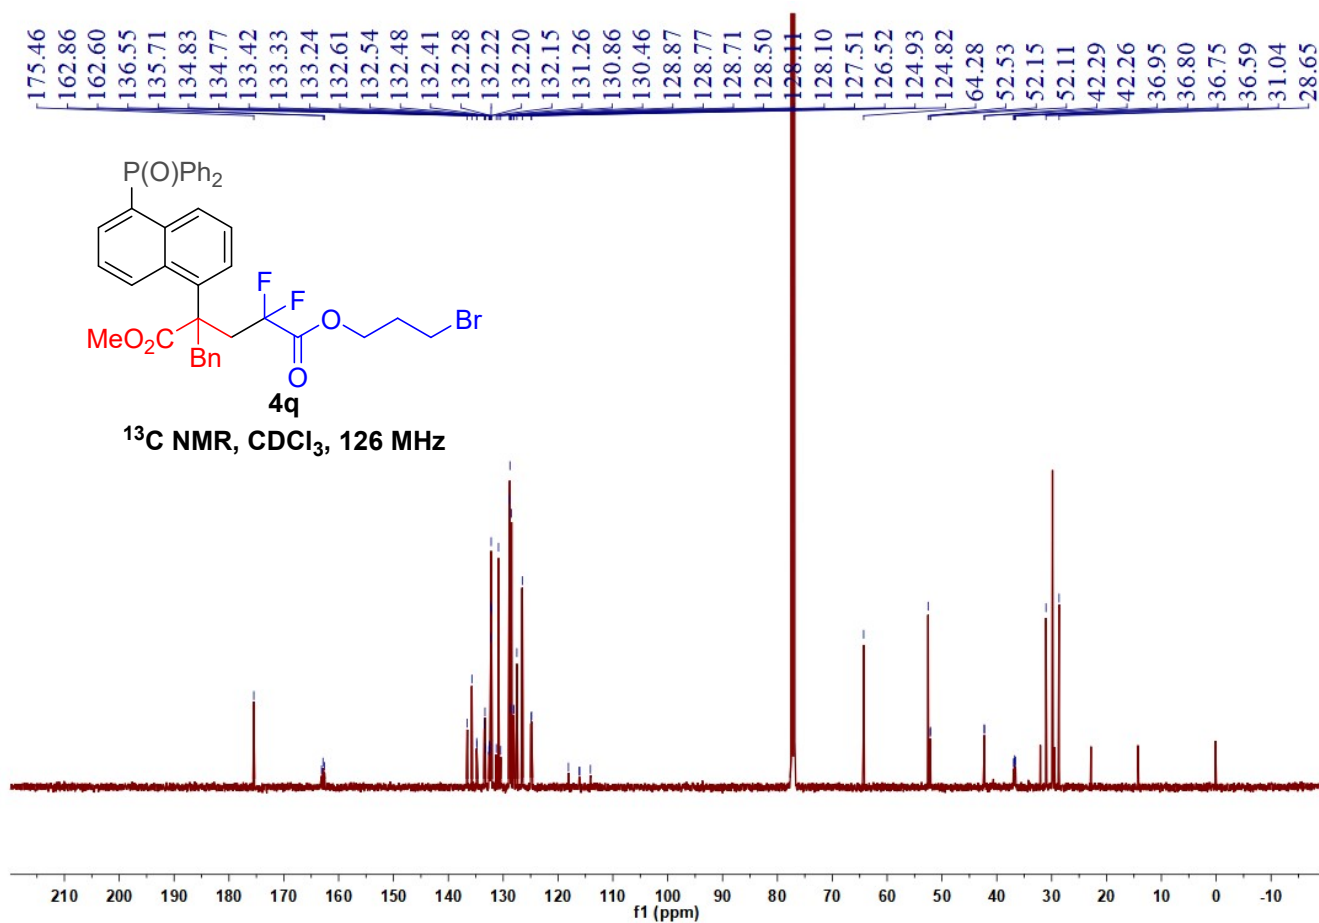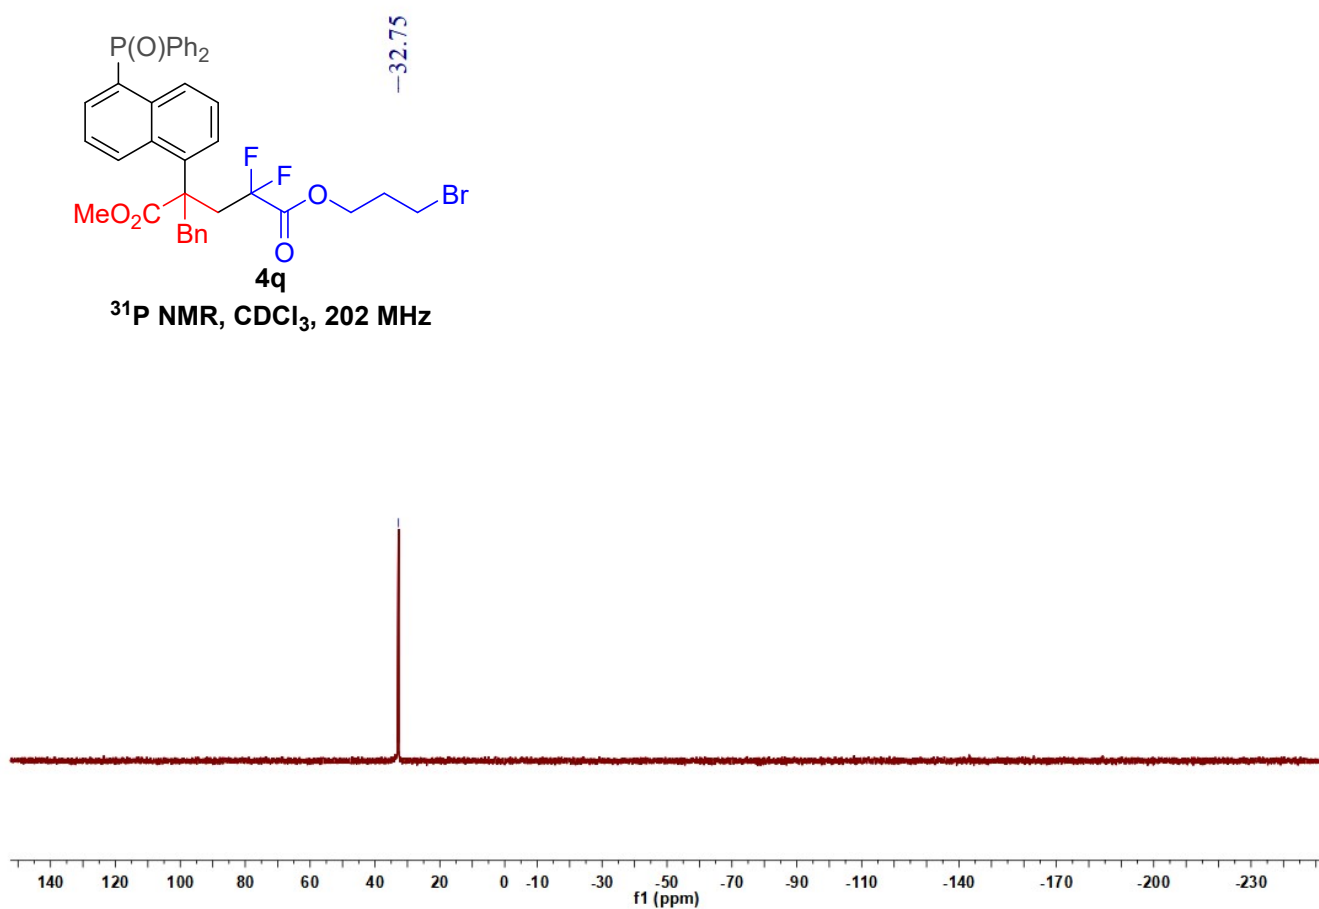

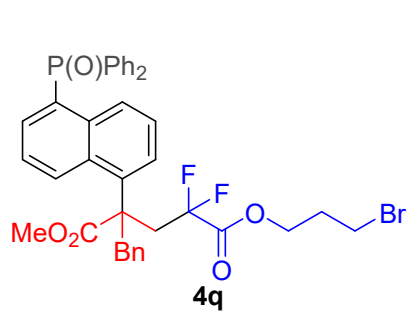

<sup>19</sup>F NMR, CDCl<sub>3</sub>, 471 MHz

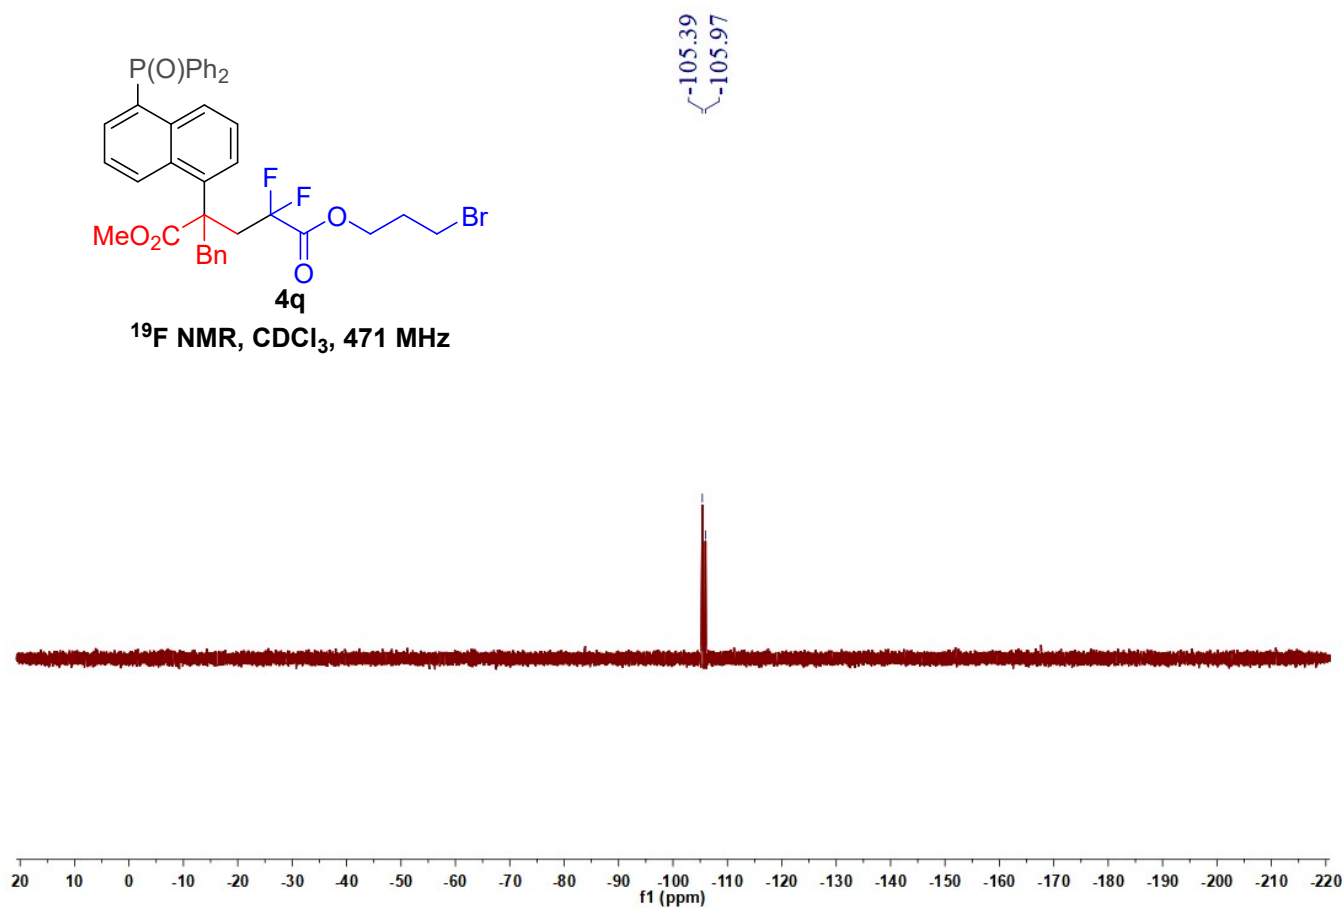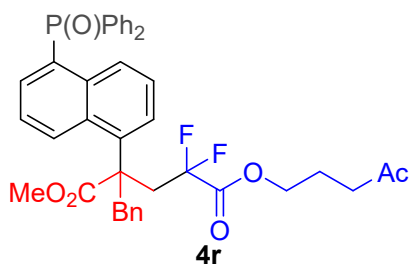

<sup>1</sup>H NMR, CDCl<sub>3</sub>, 400 MHz

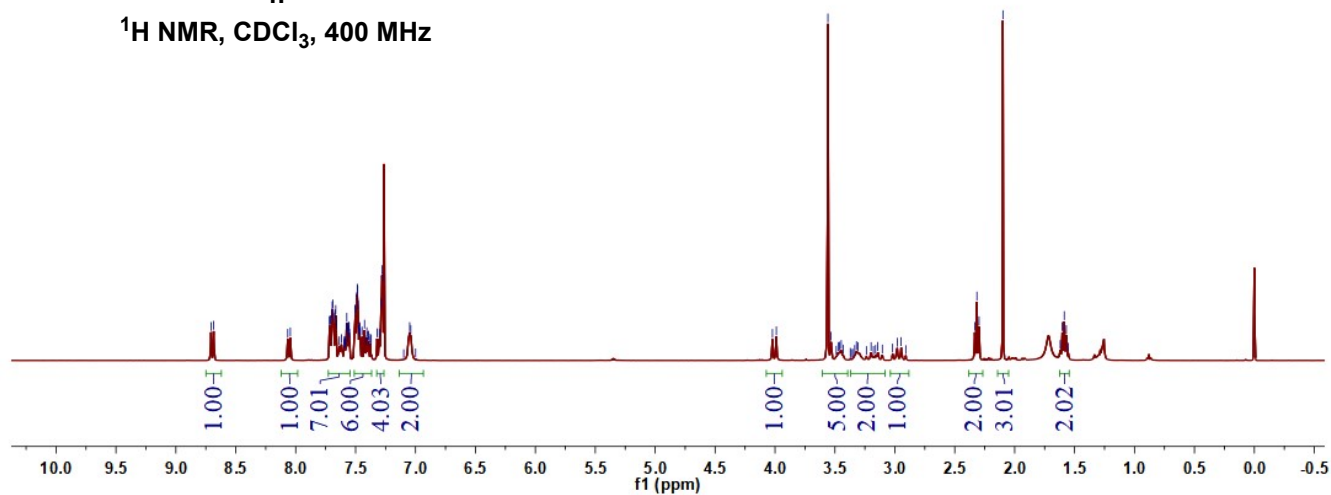



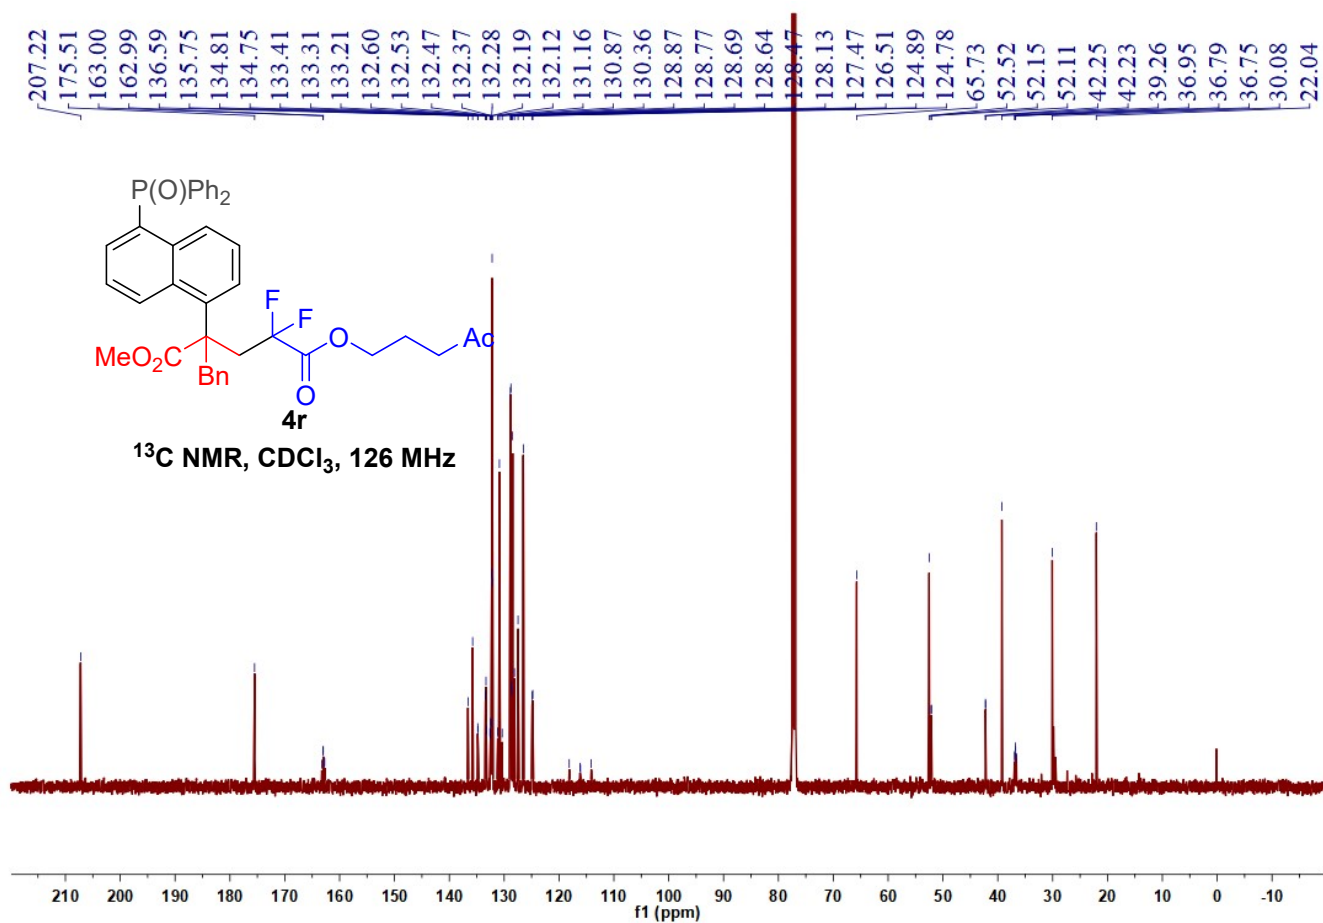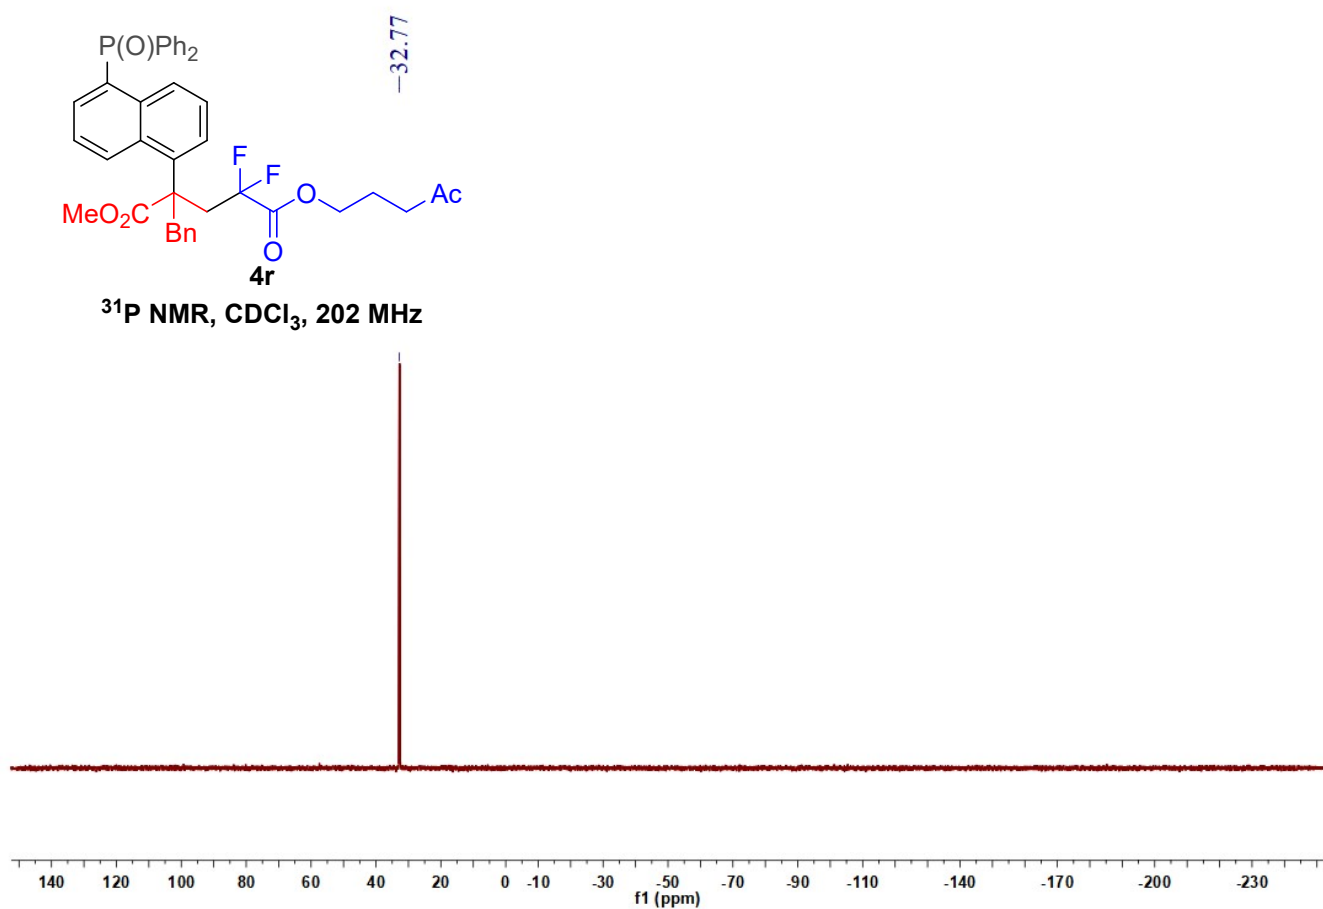

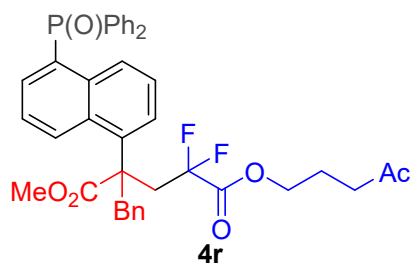

$^{19}\text{F}$  NMR,  $\text{CDCl}_3$ , 471 MHz

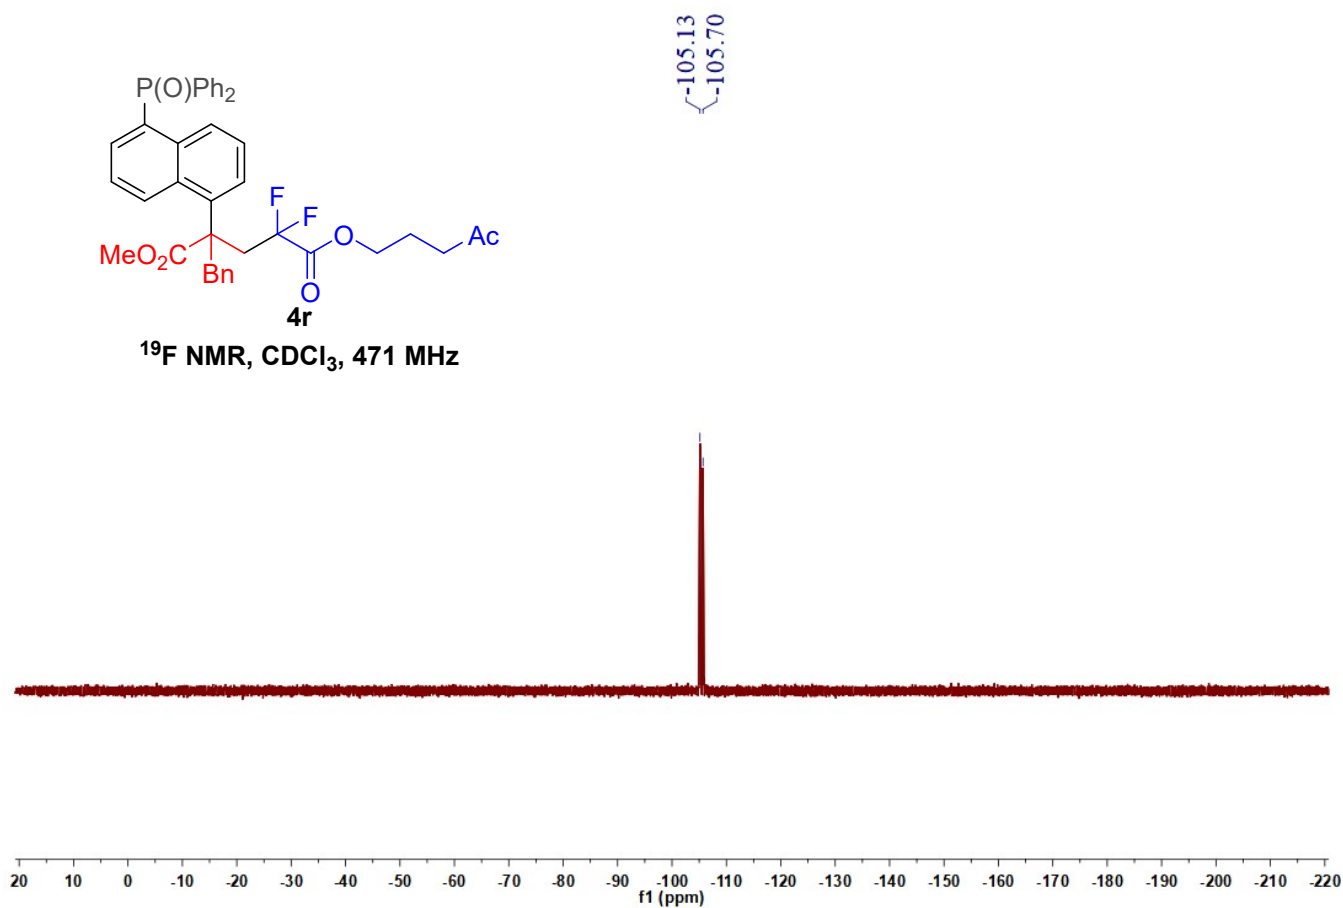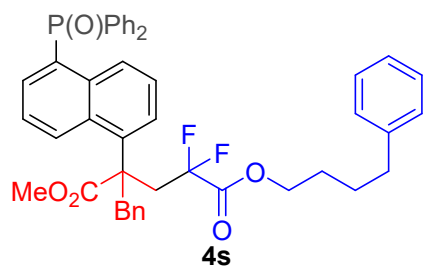

$^1\text{H}$  NMR,  $\text{CDCl}_3$ , 400 MHz

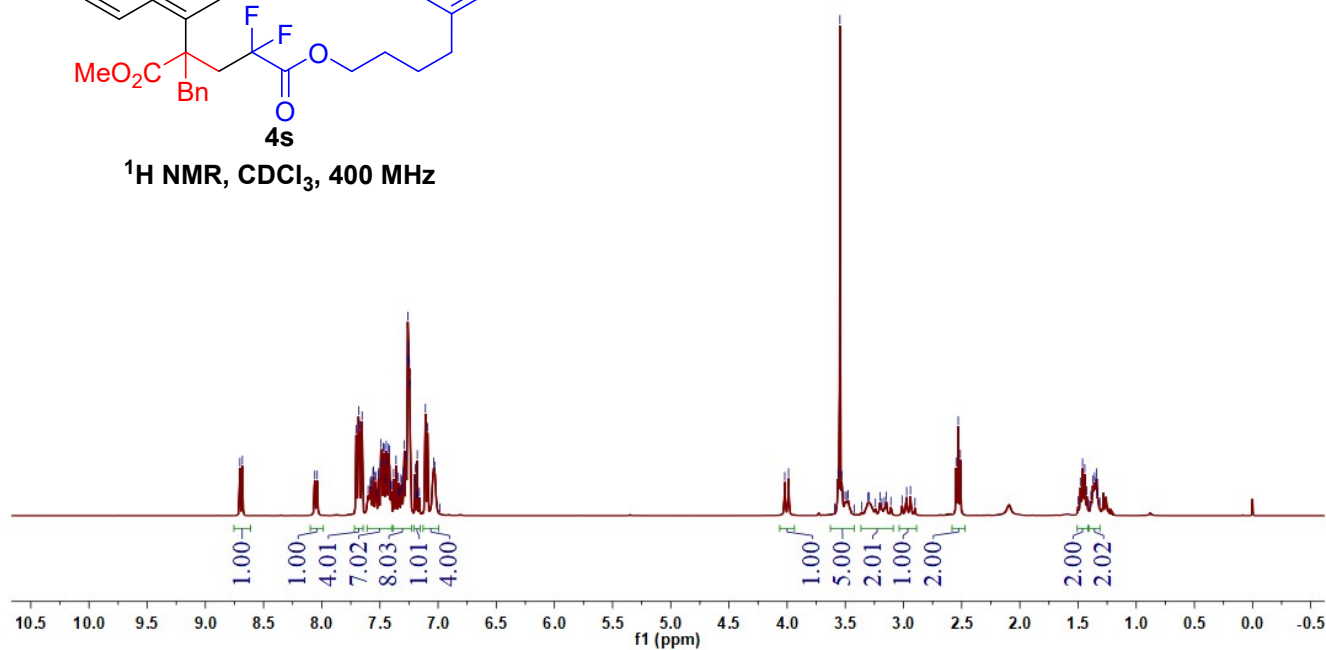

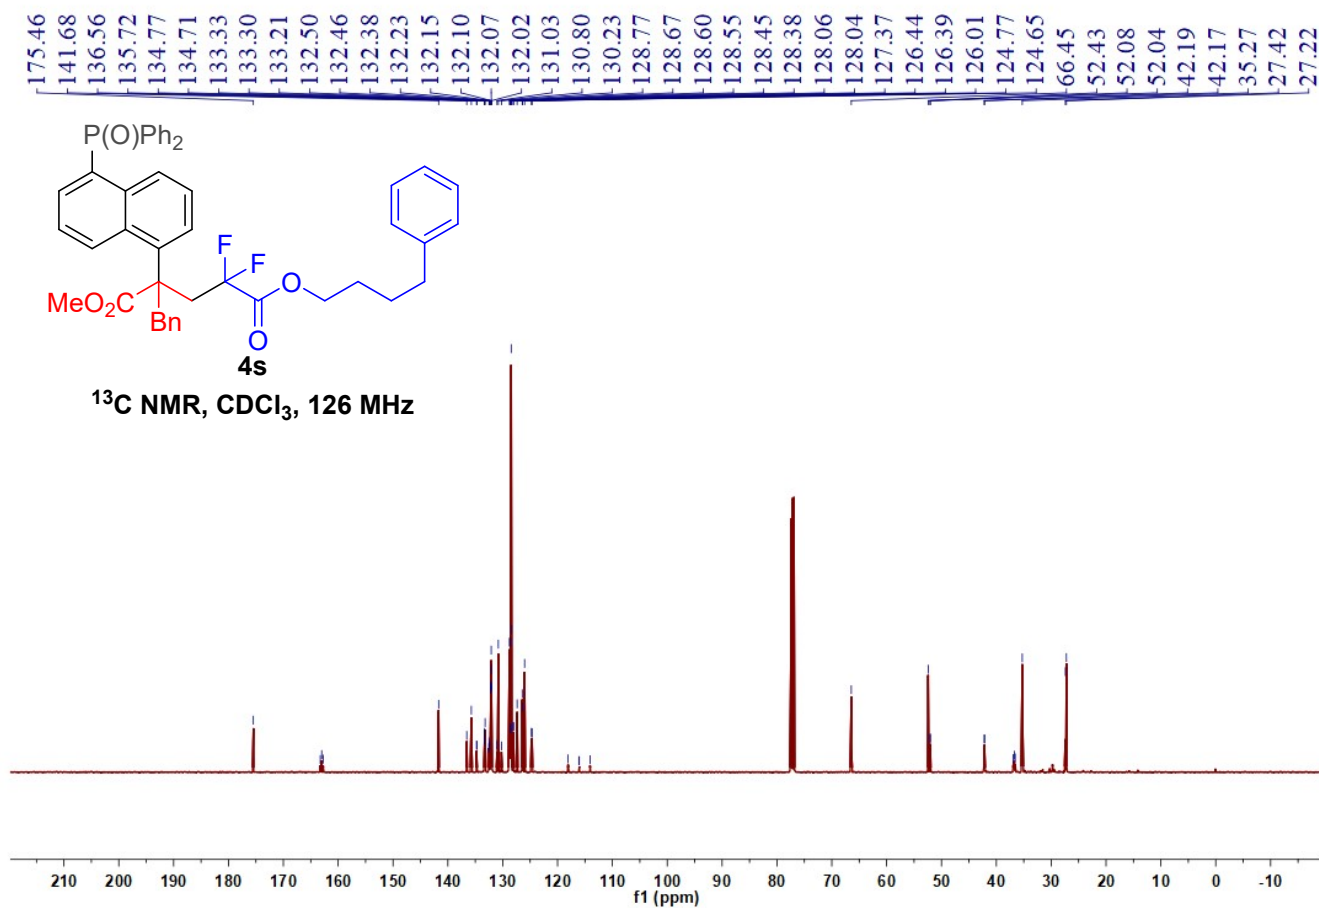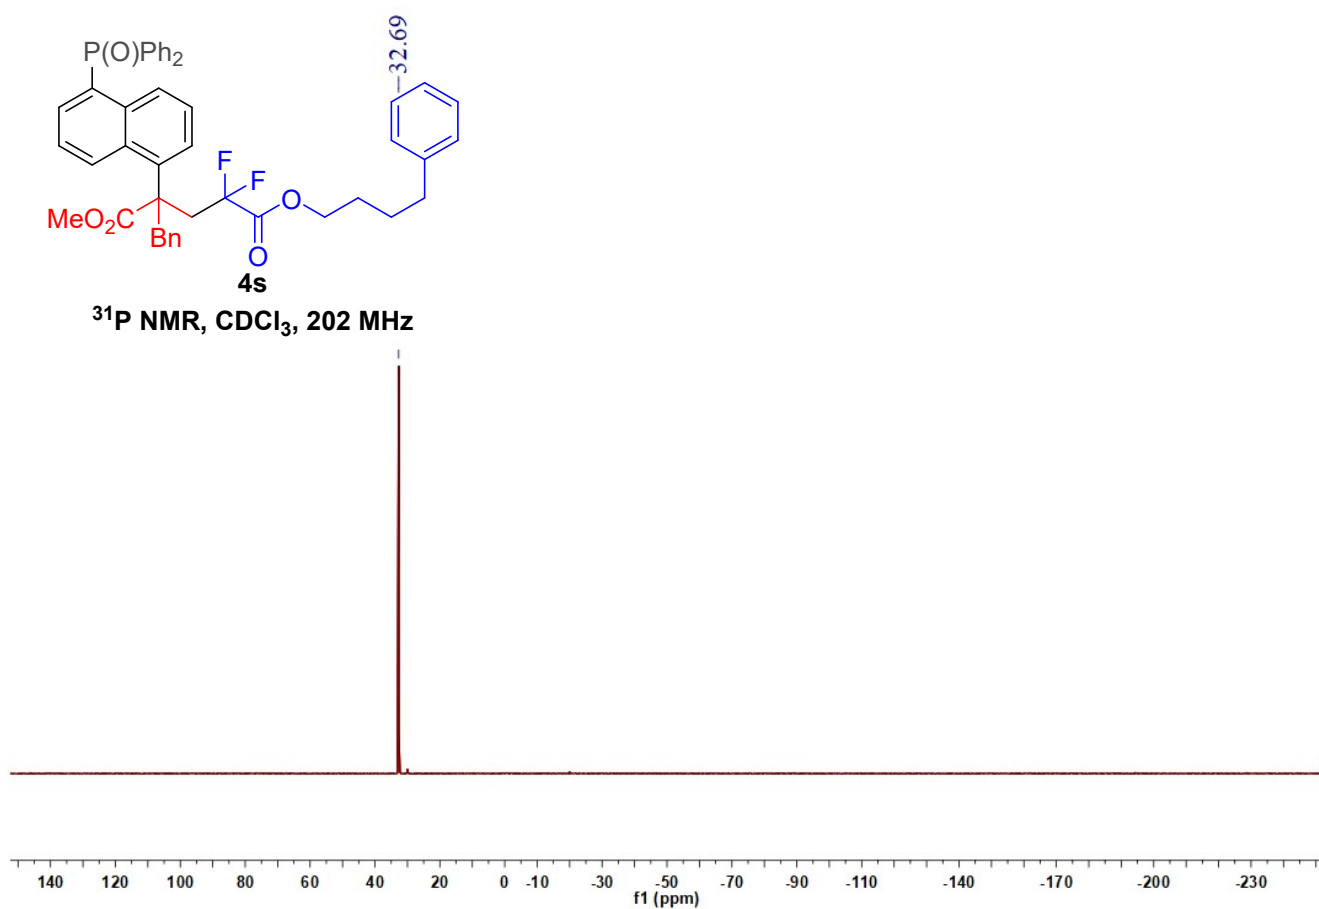

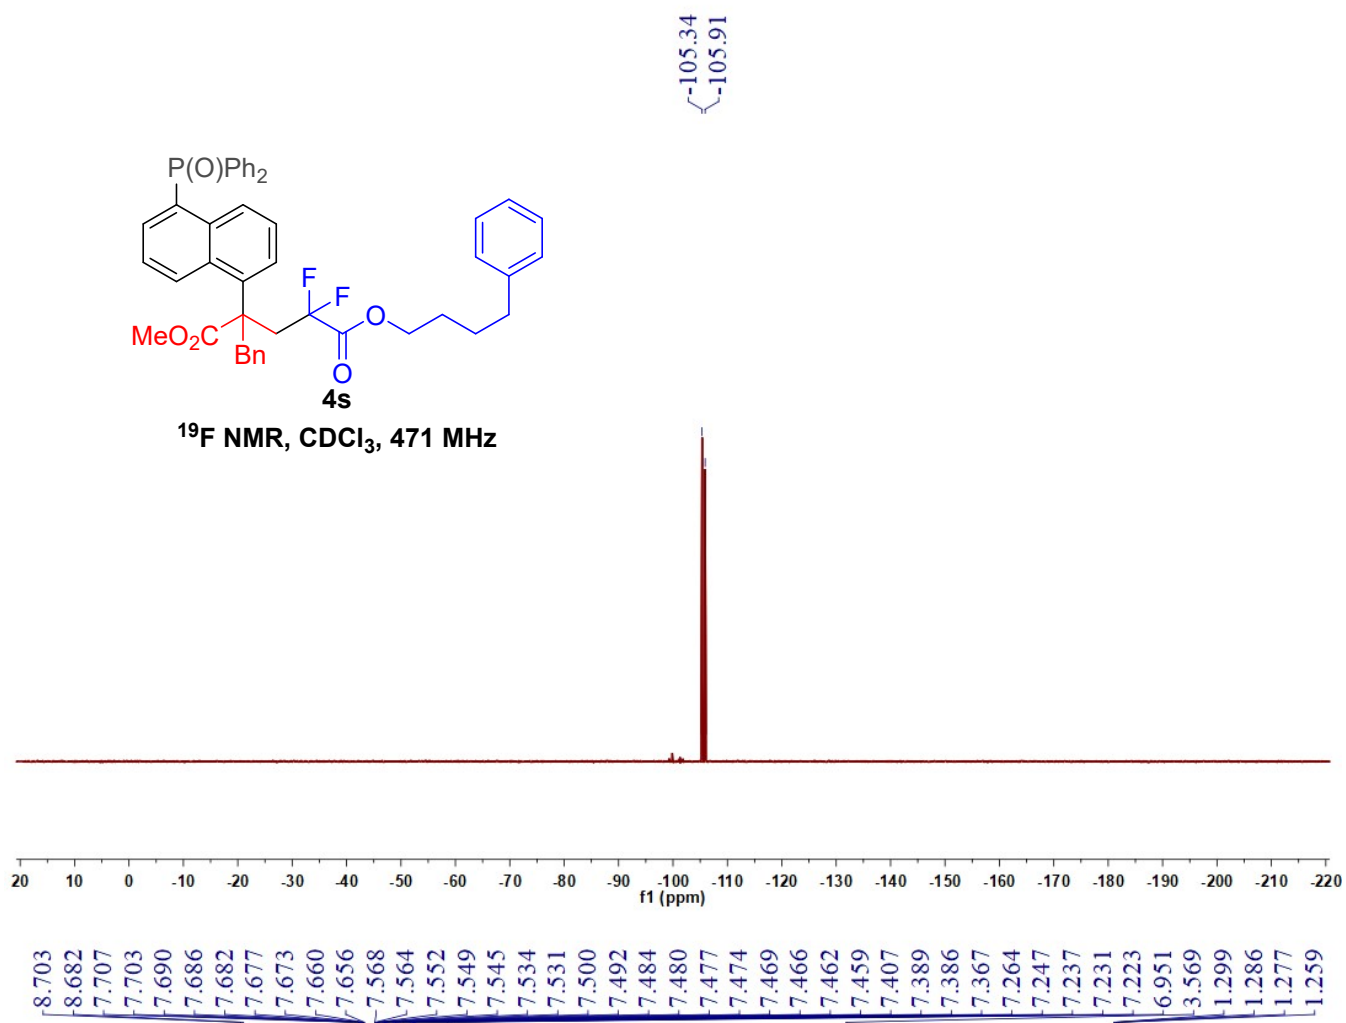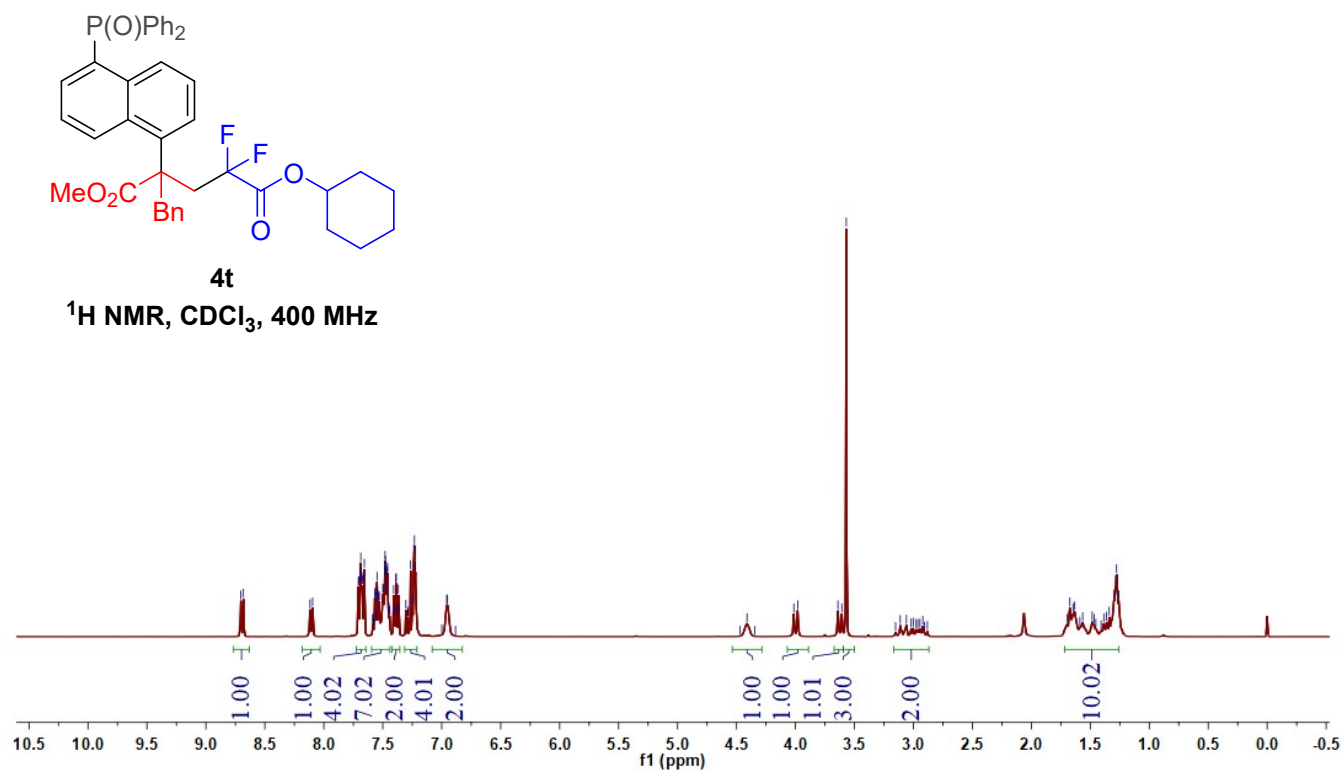

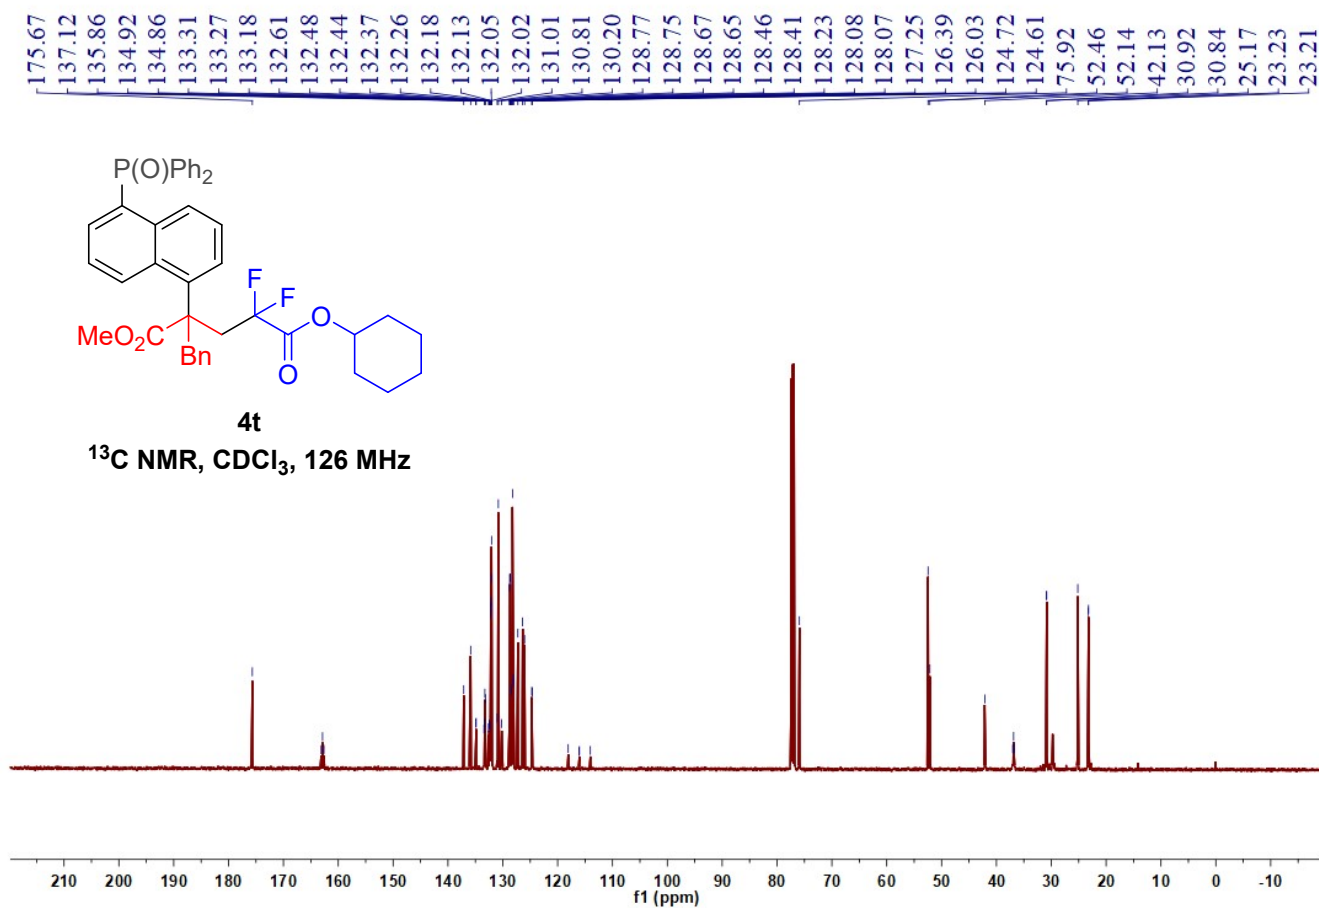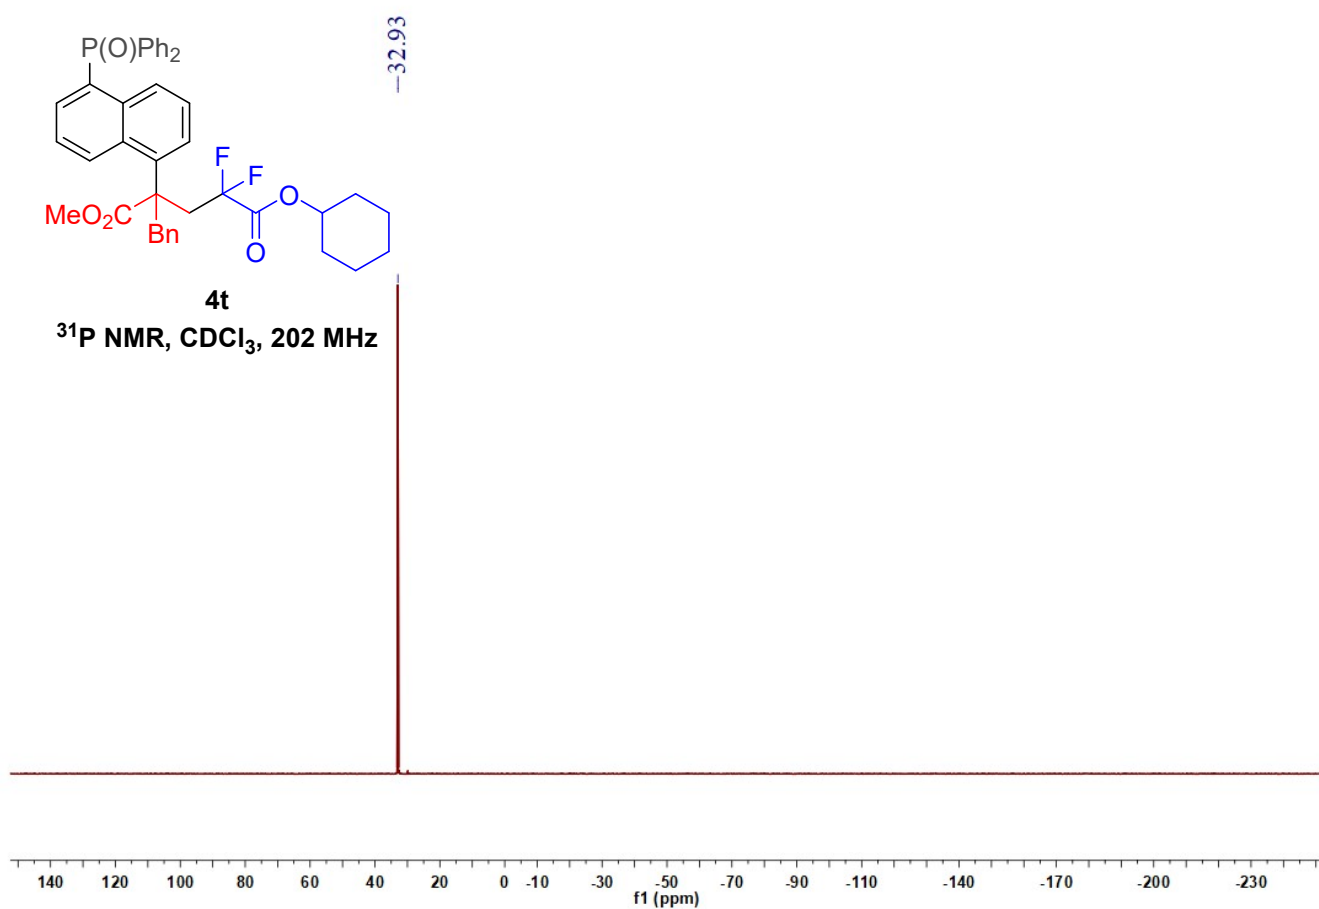

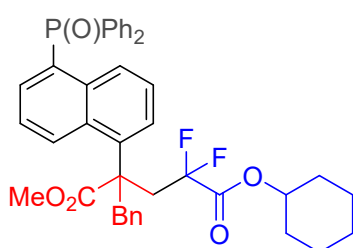

**4t**

**$^{19}\text{F}$  NMR,  $\text{CDCl}_3$ , 471 MHz**

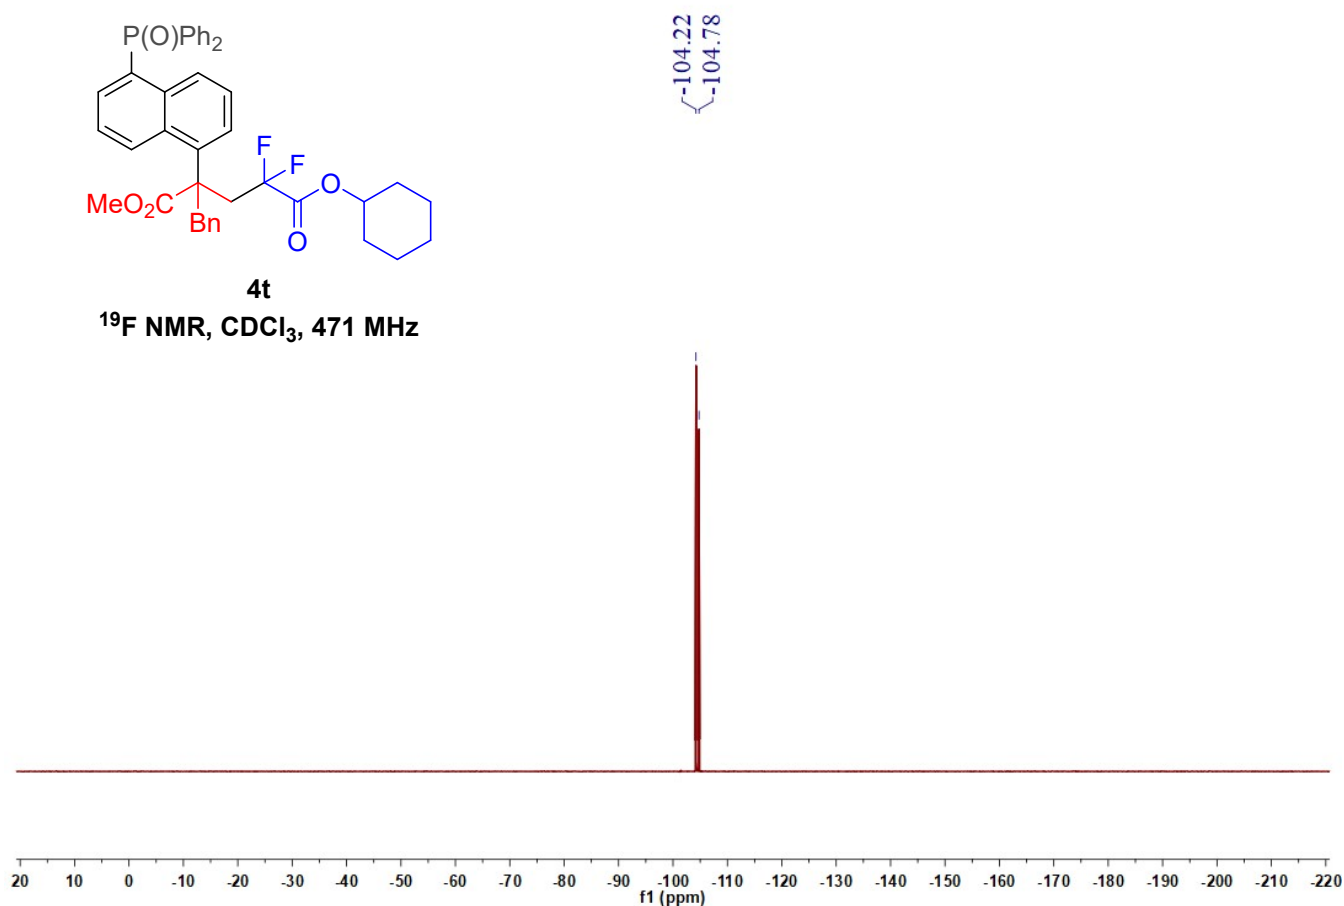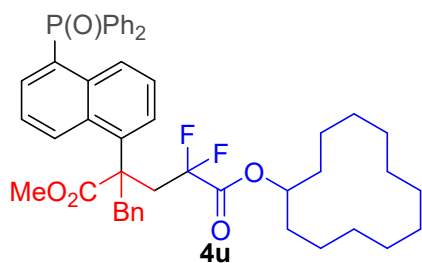

**4u**

**$^1\text{H}$  NMR,  $\text{CDCl}_3$ , 400 MHz**

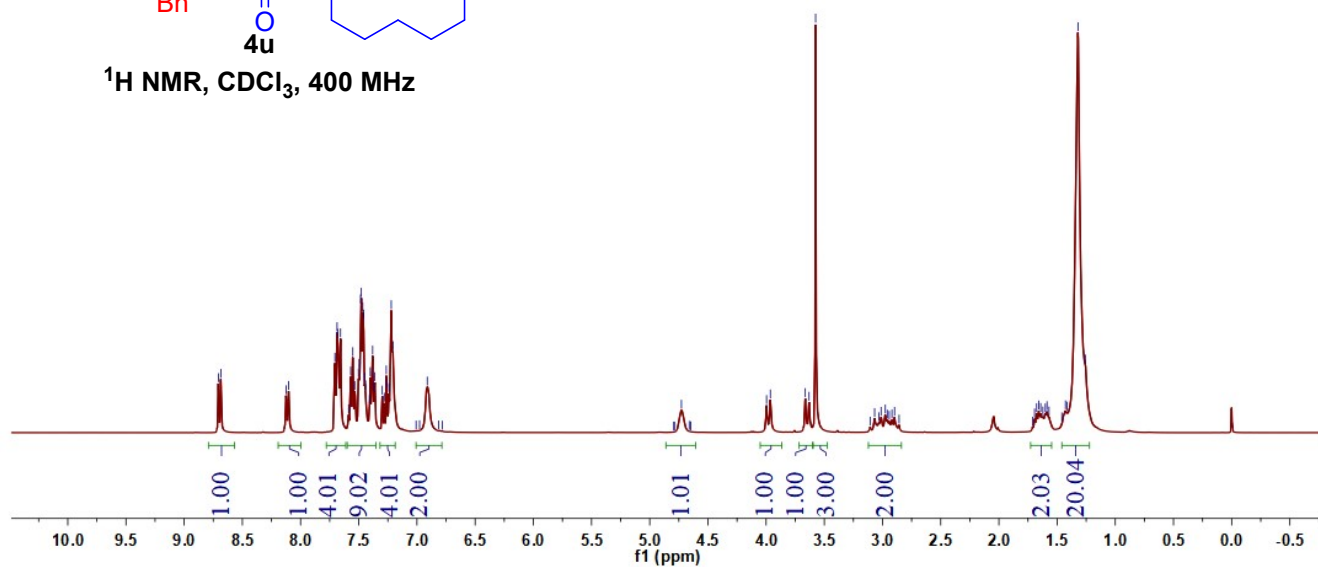

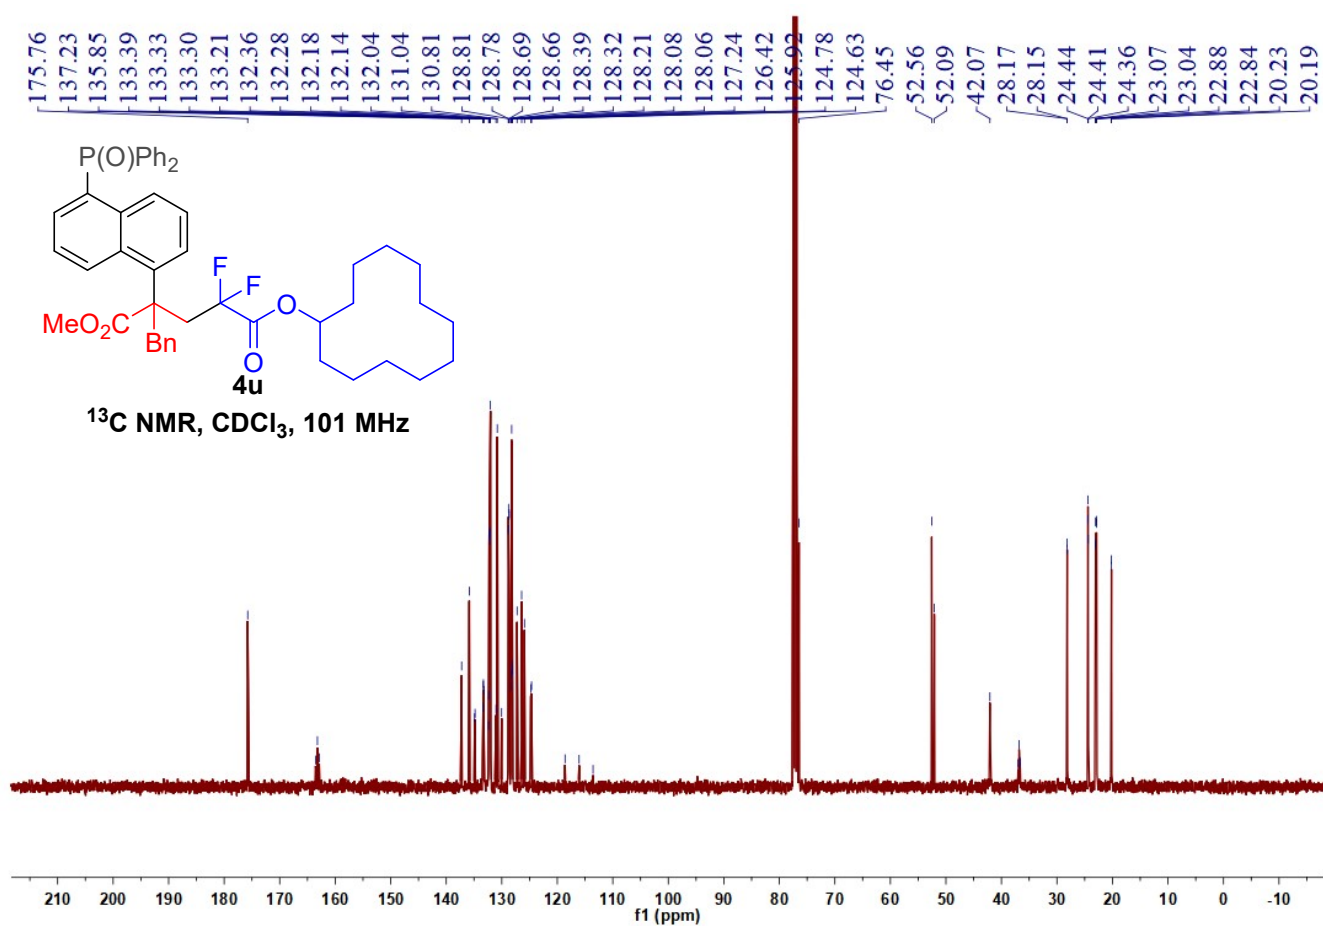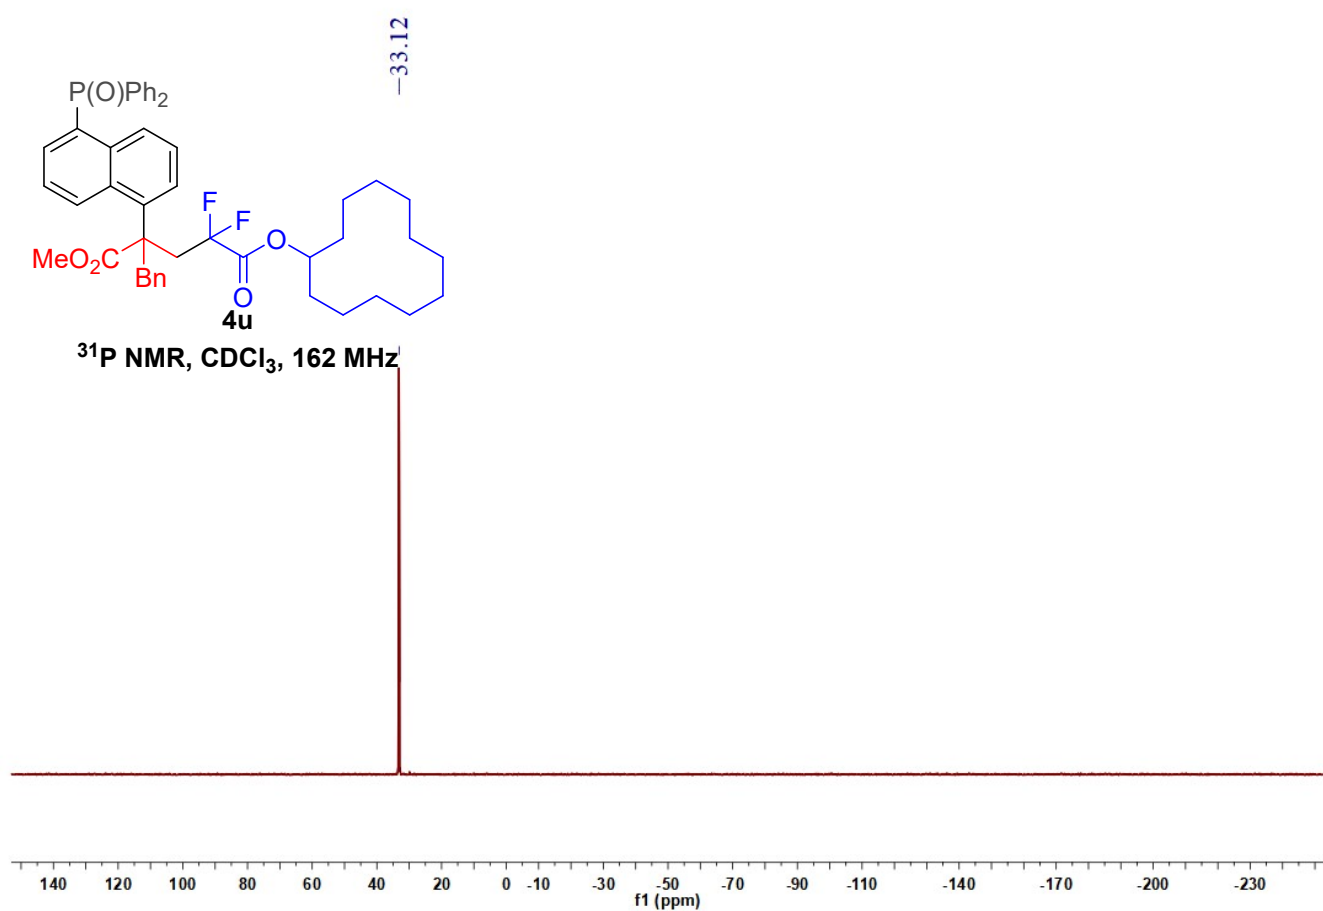



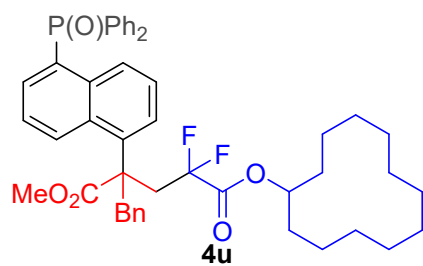

**19F NMR, CDCl3, 377 MHz**

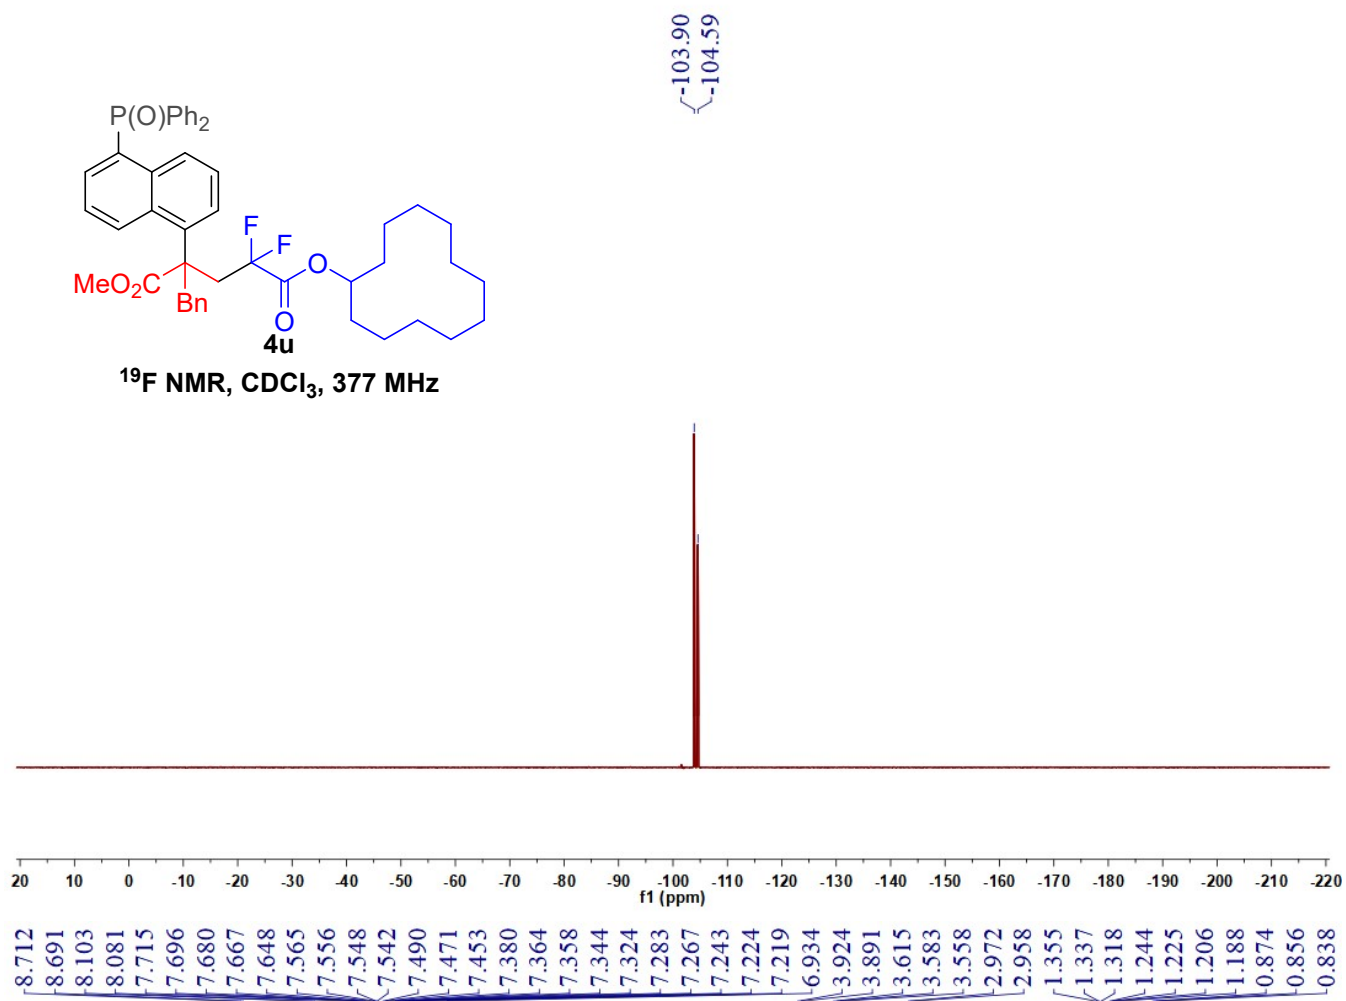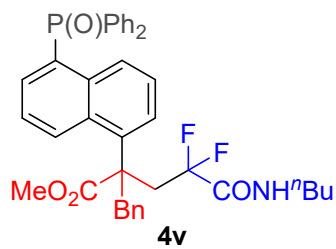

**1H NMR, CDCl3, 400 MHz**

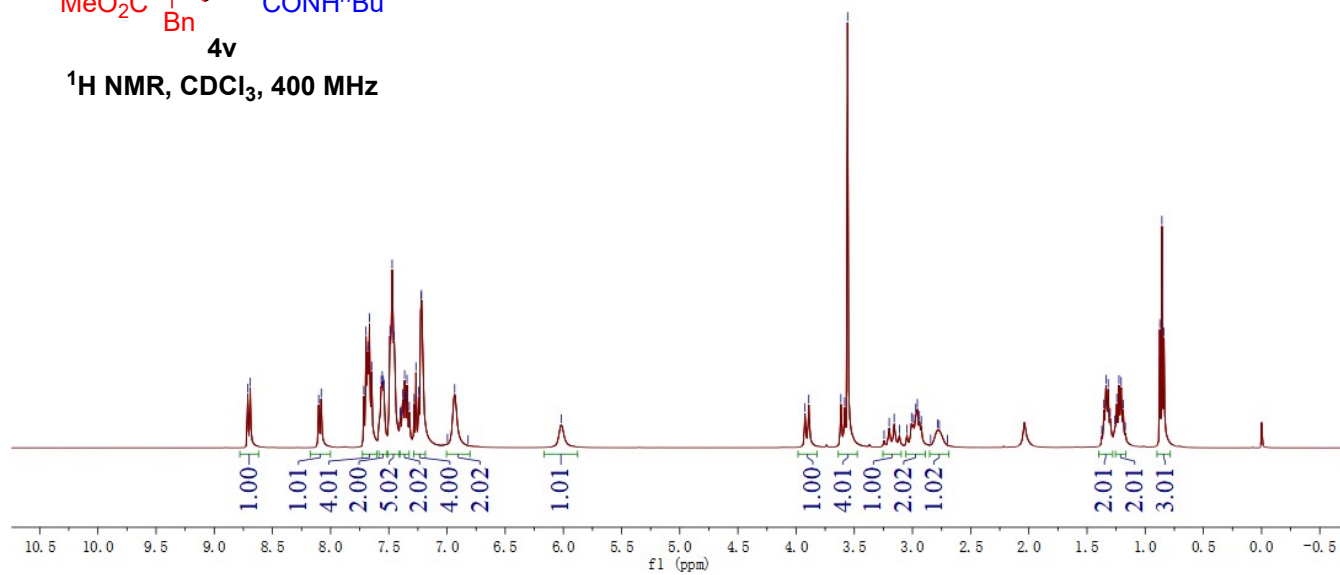

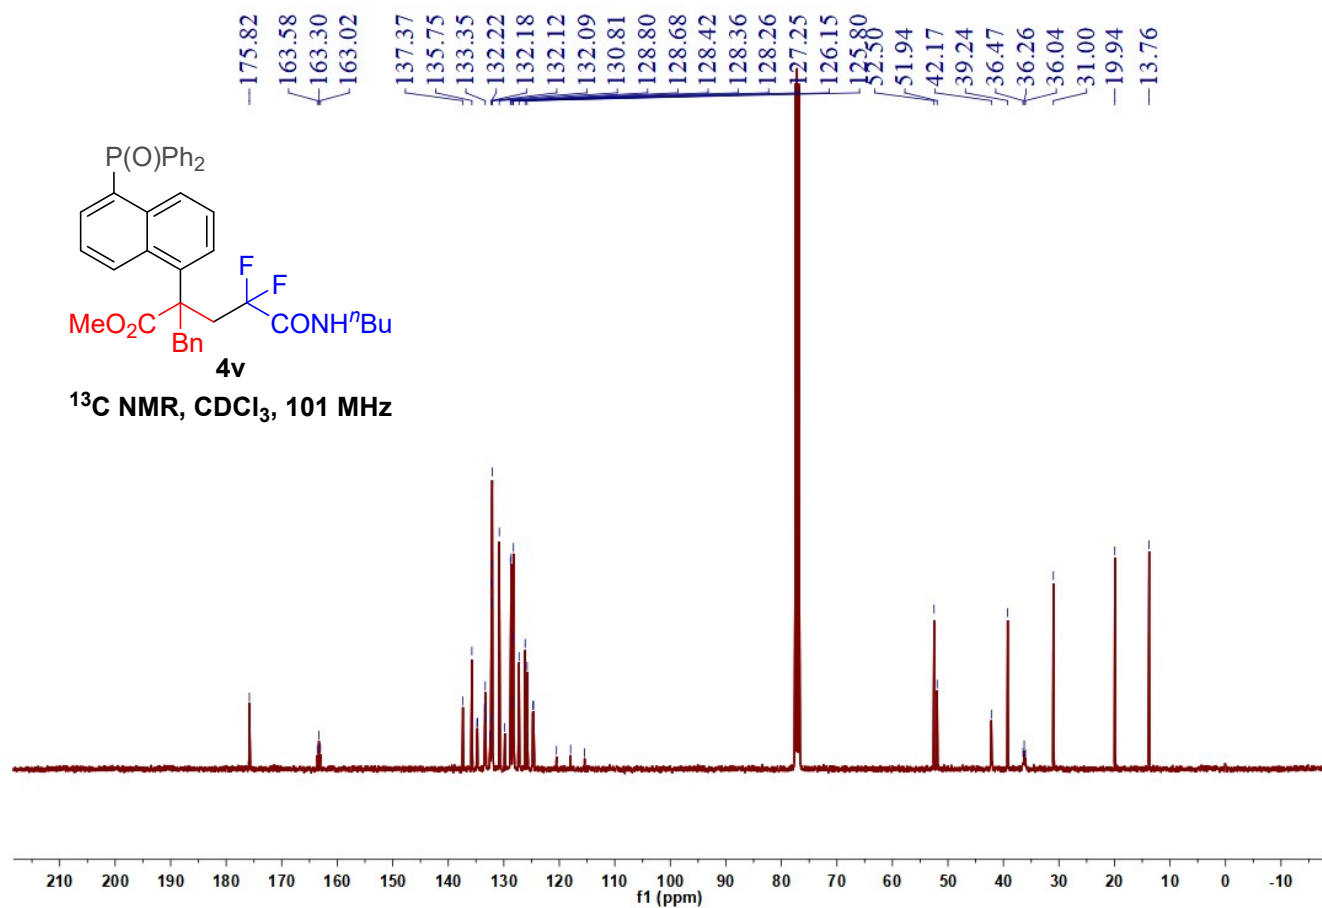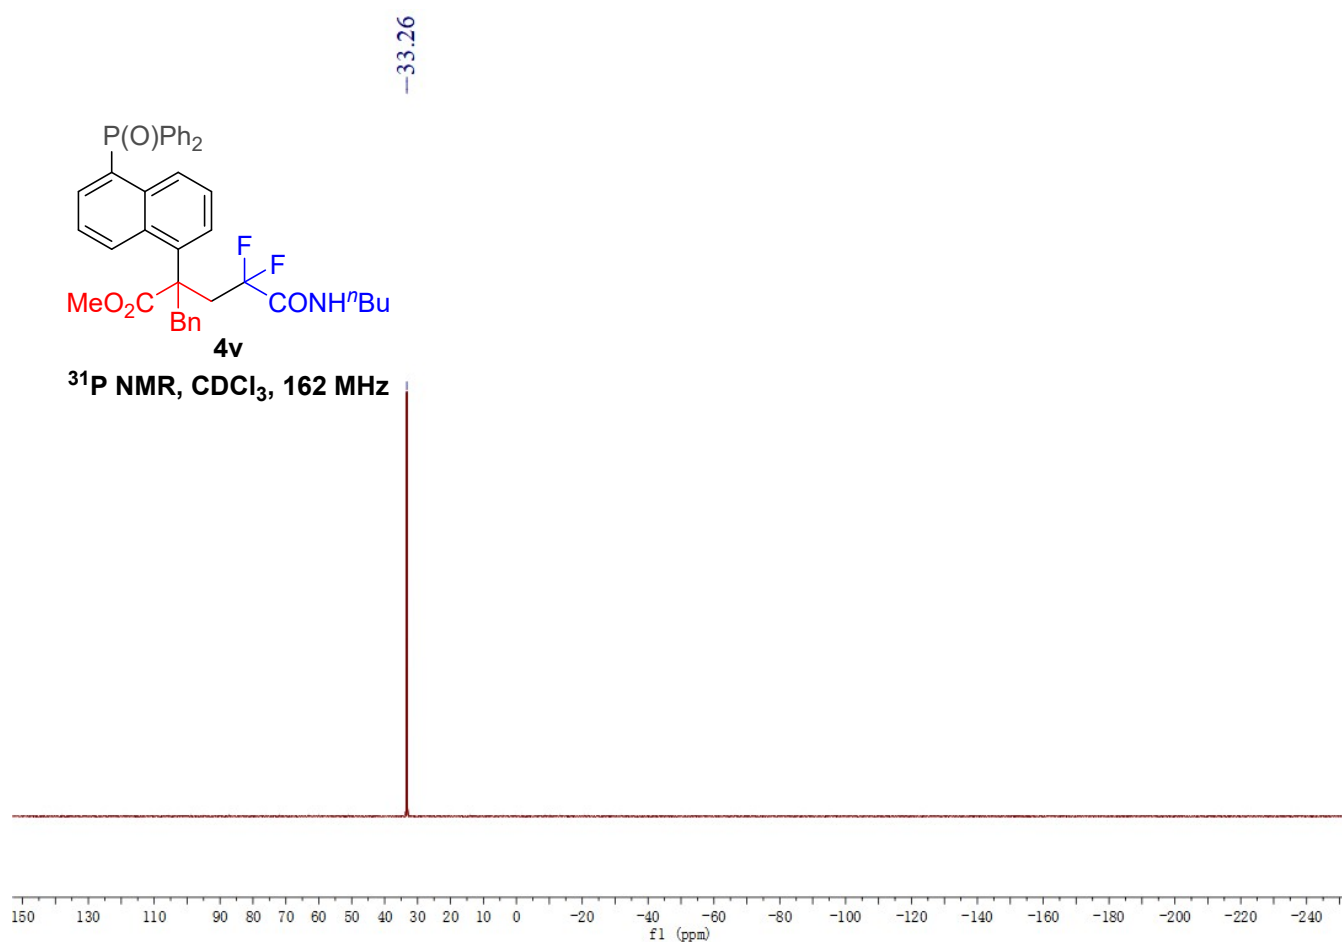

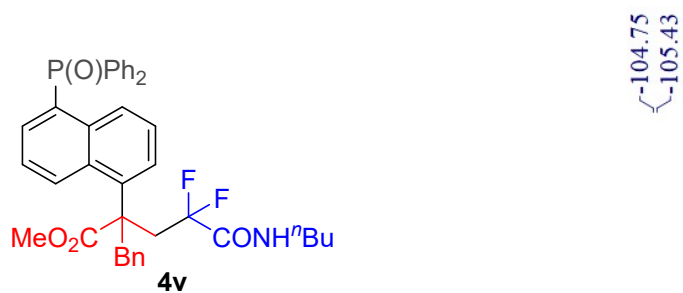

<sup>19</sup>F NMR, CDCl<sub>3</sub>, 377 MHz

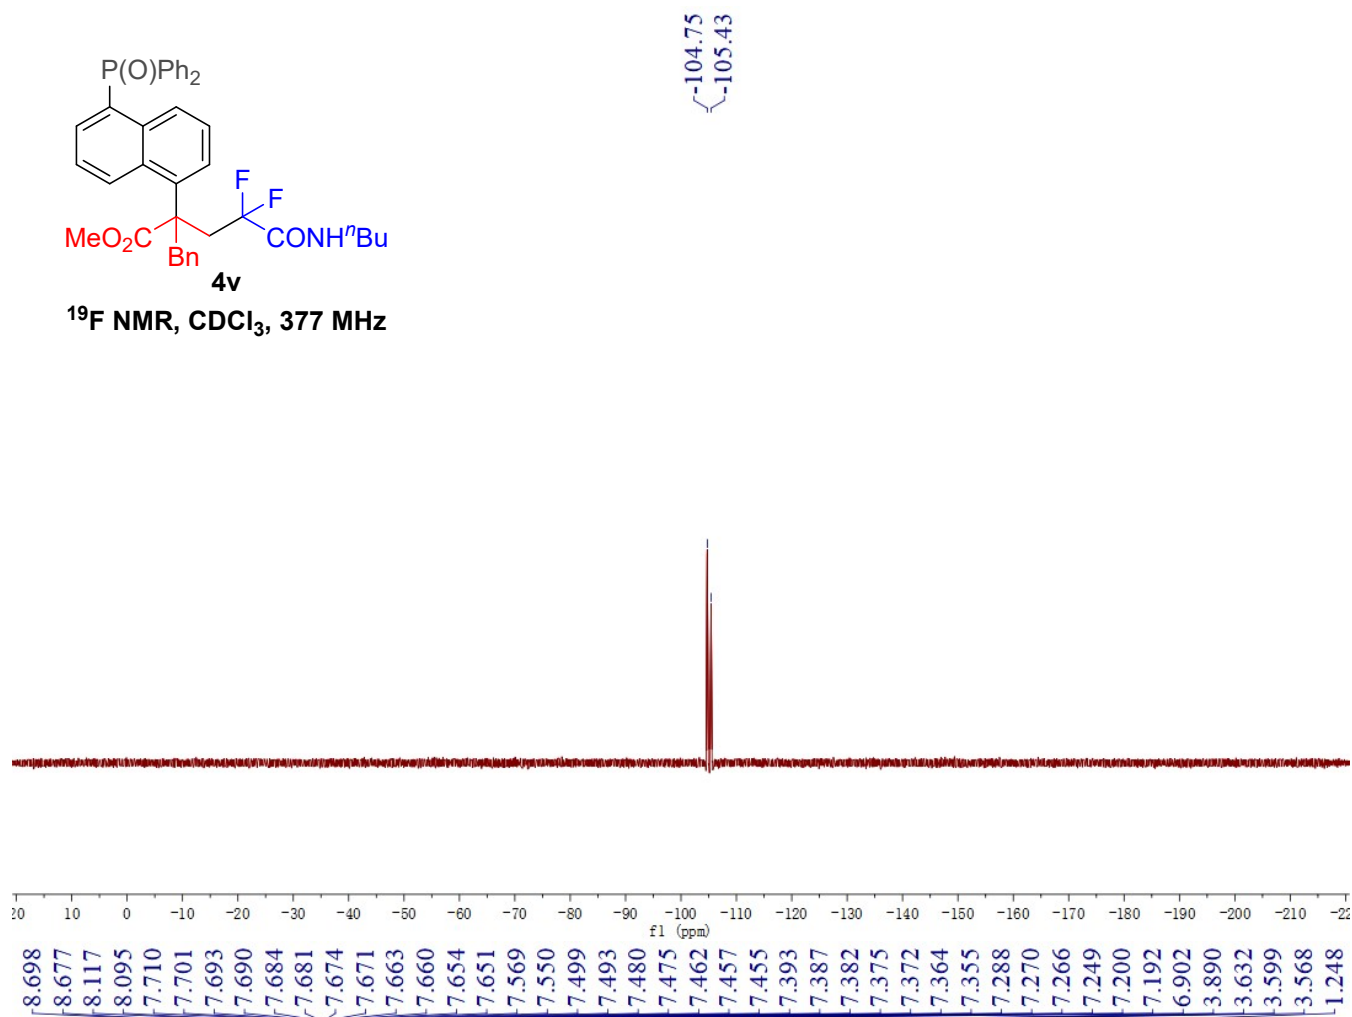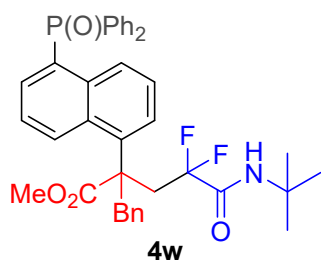

<sup>1</sup>H NMR, CDCl<sub>3</sub>, 400 MHz

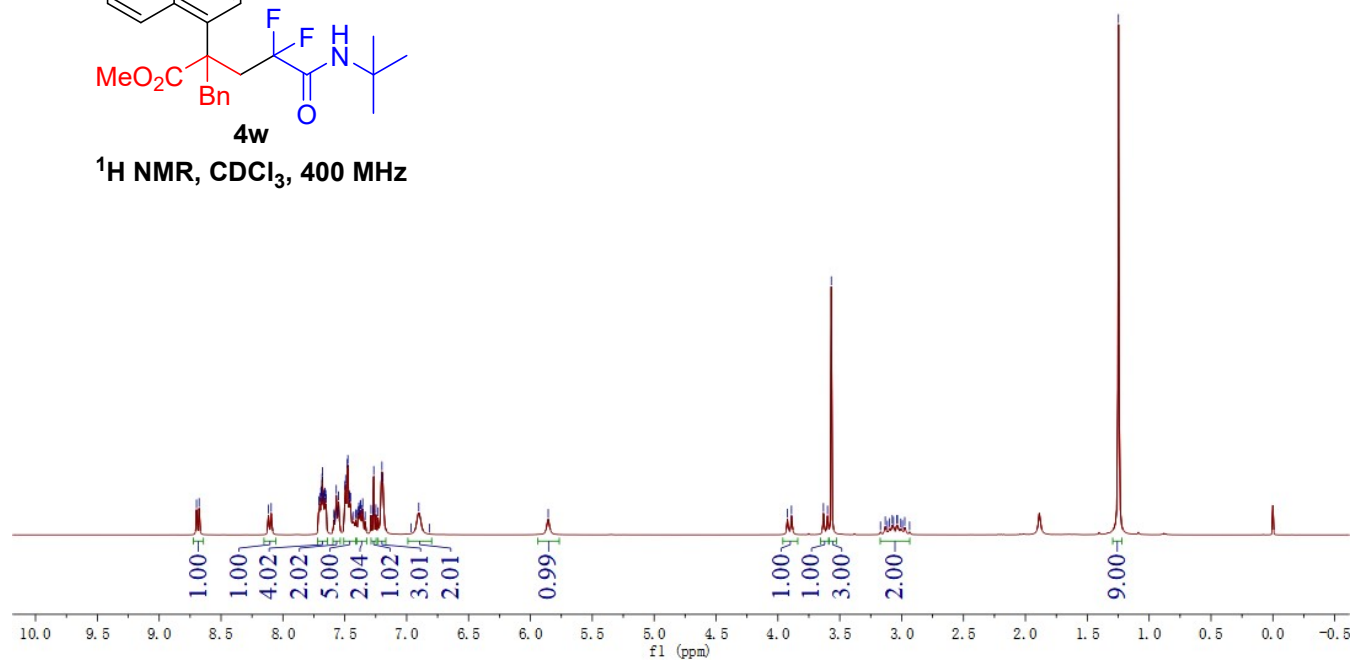

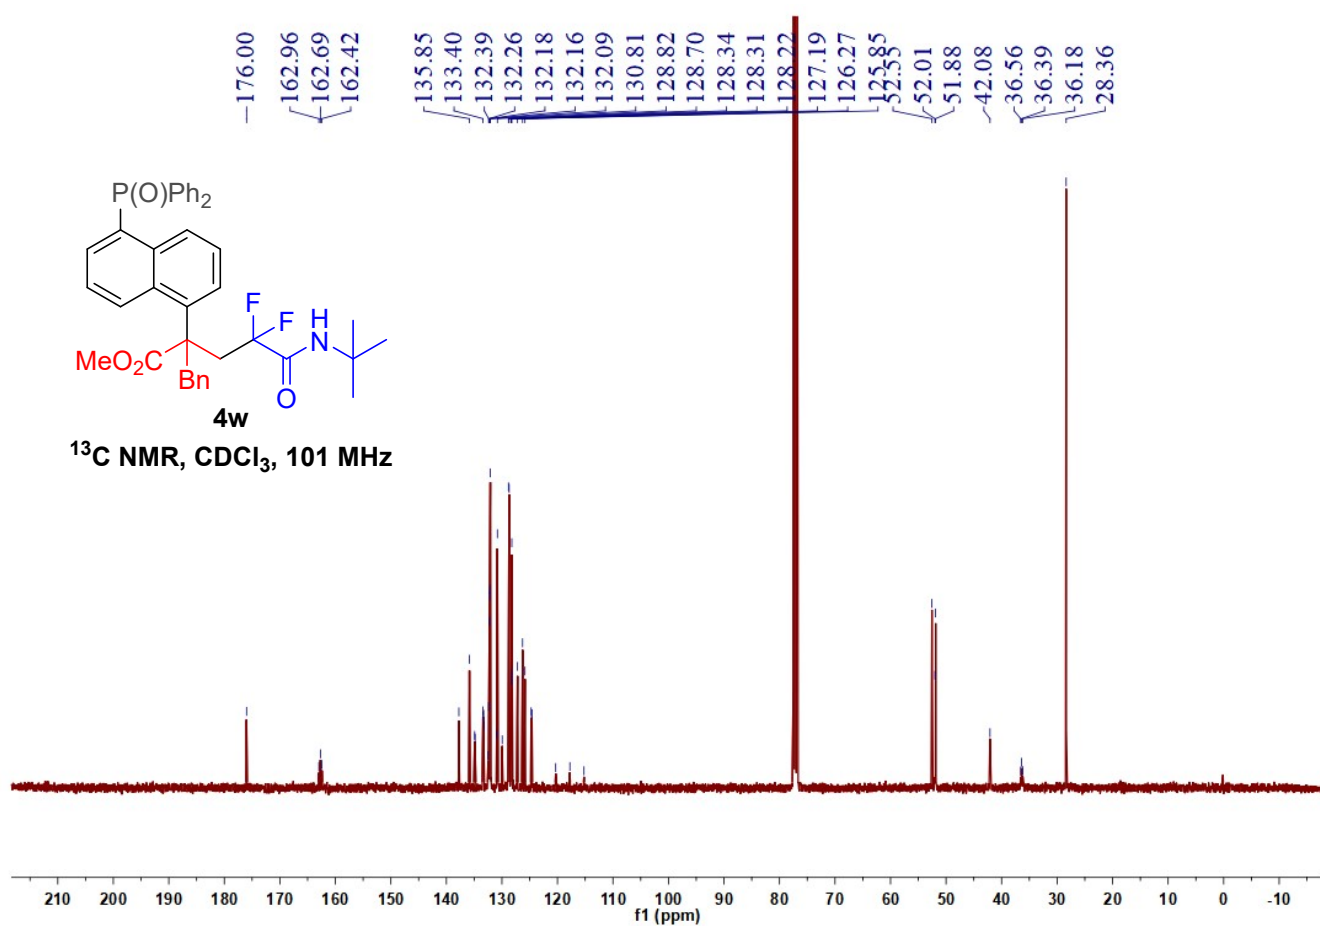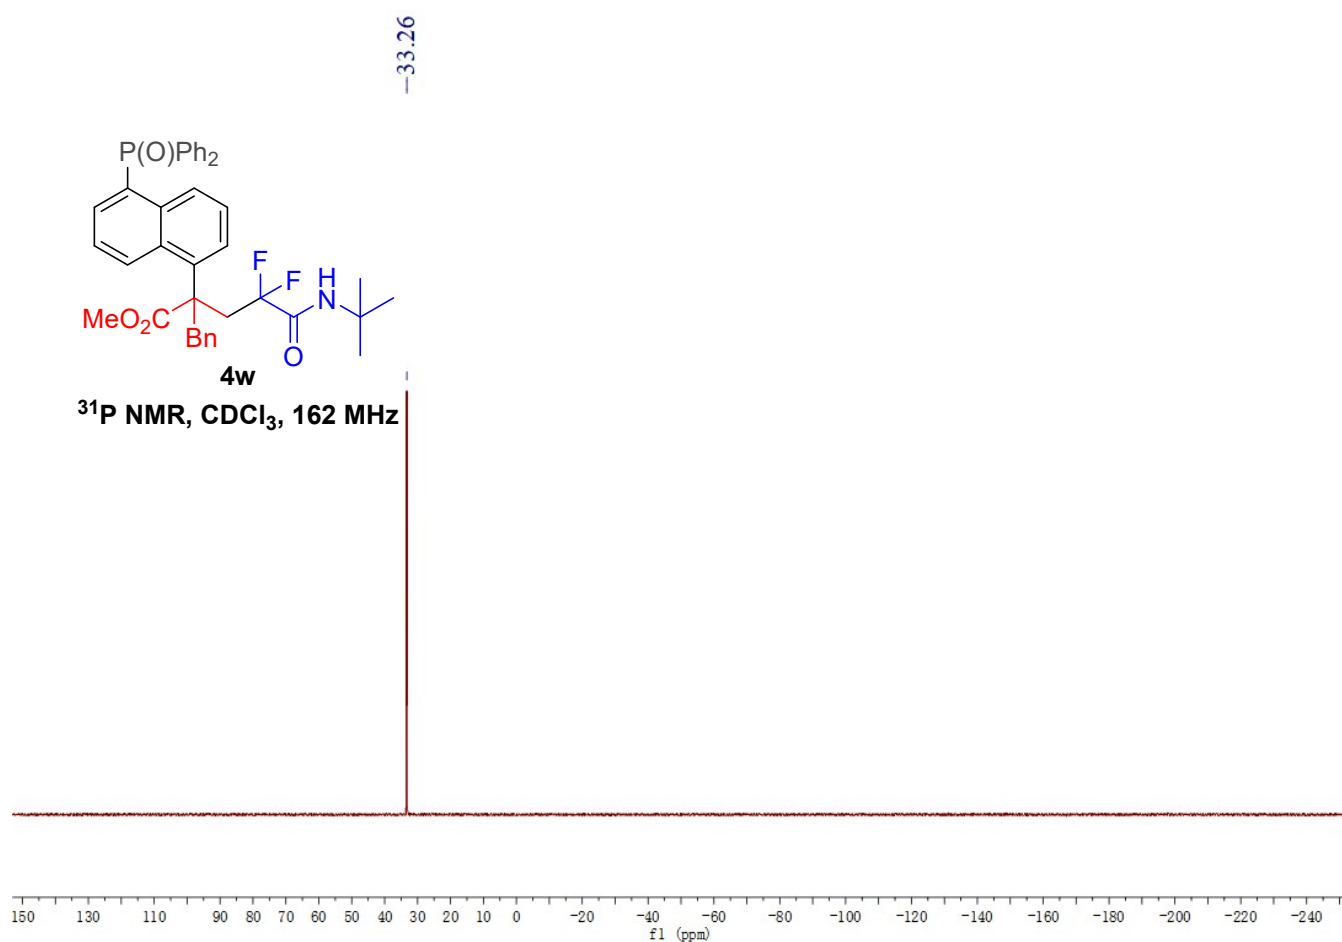

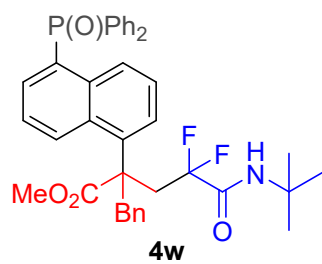

$^{19}\text{F}$  NMR,  $\text{CDCl}_3$ , 377 MHz

-99.34  
 -100.02  
 -102.18  
 -102.86

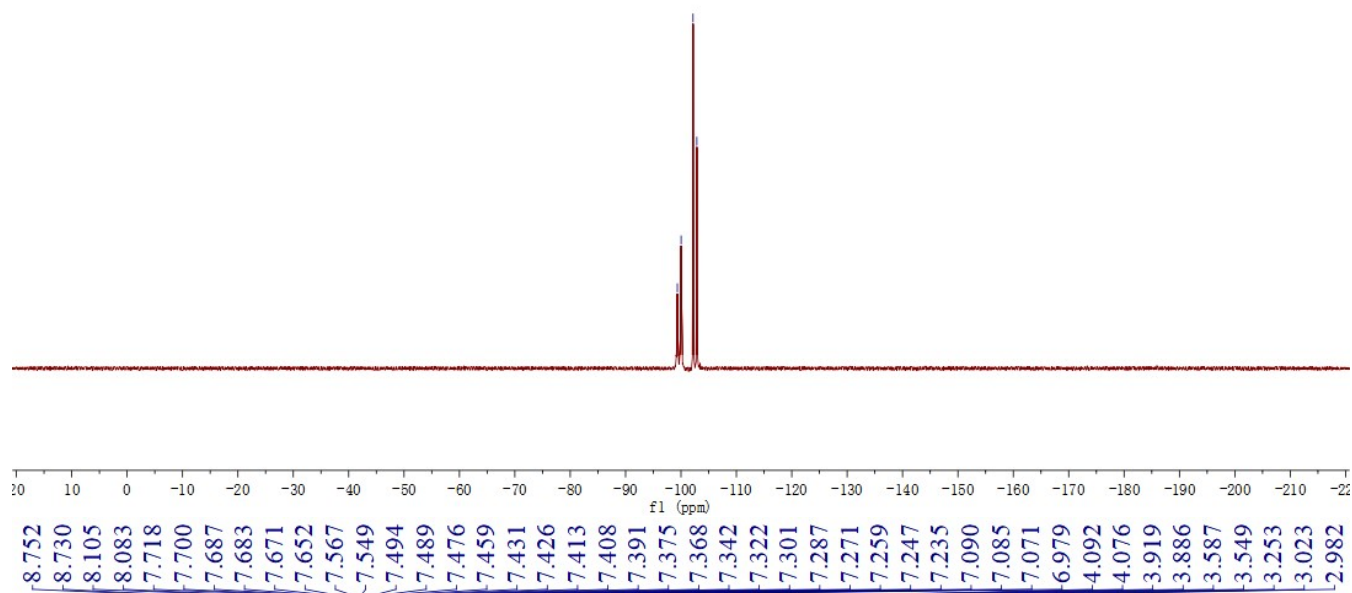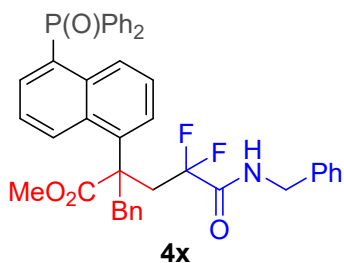

$^1\text{H}$  NMR,  $\text{CDCl}_3$ , 400 MHz

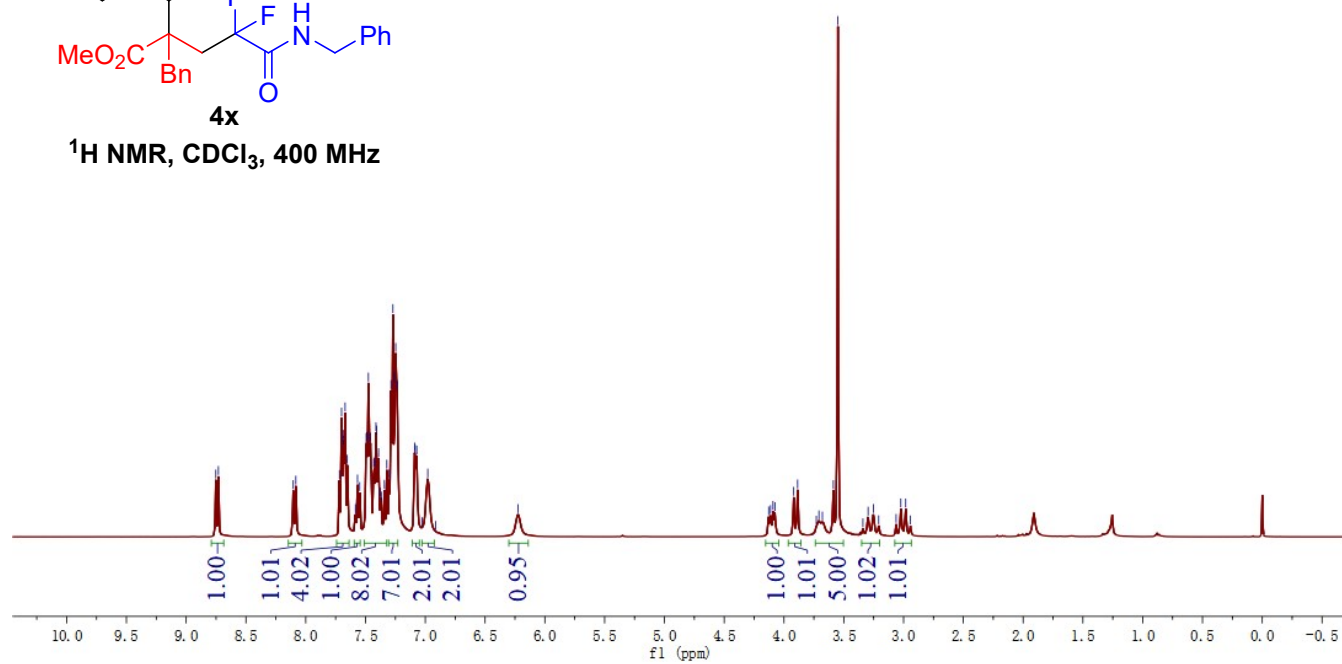

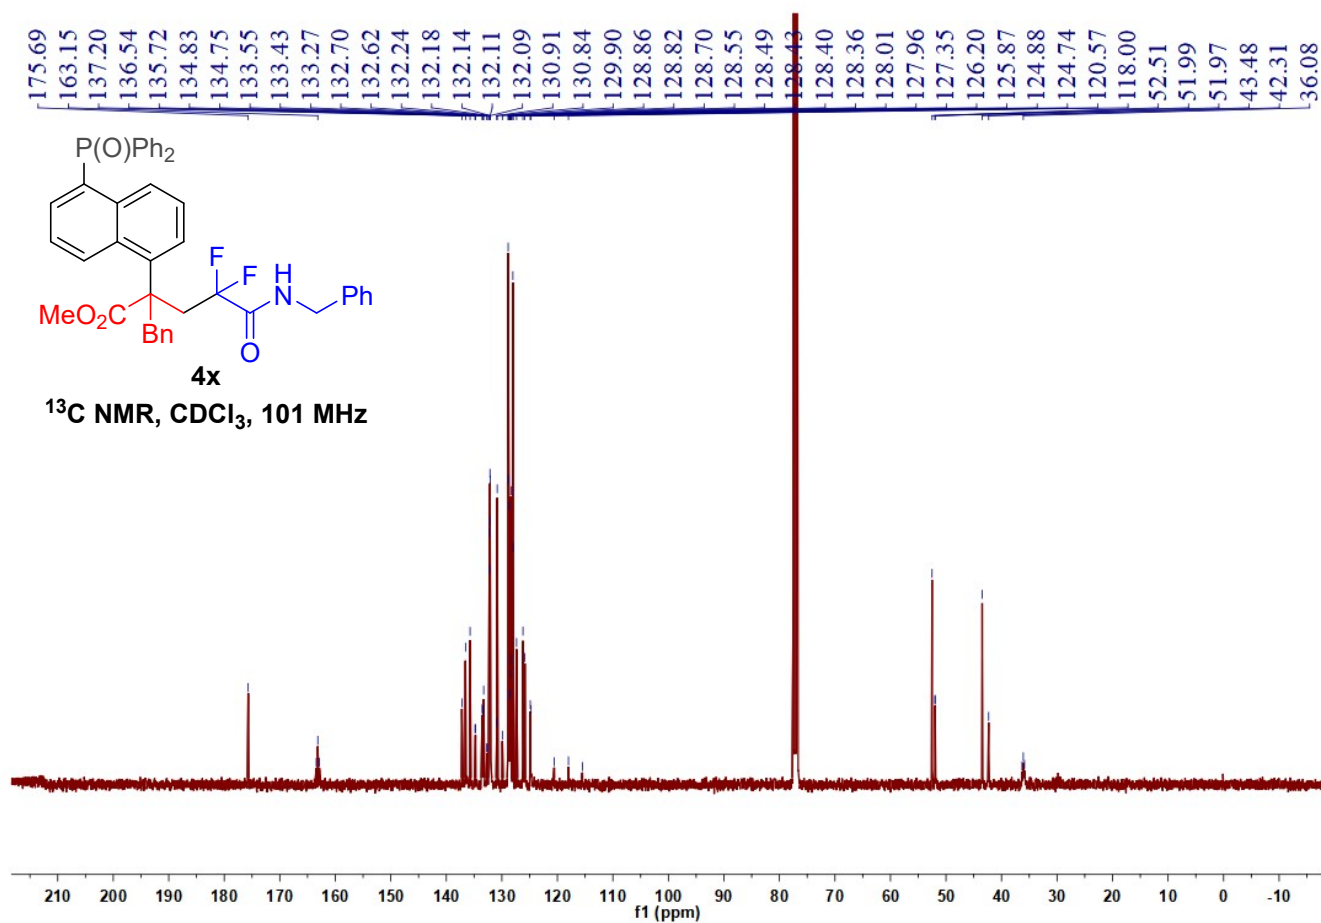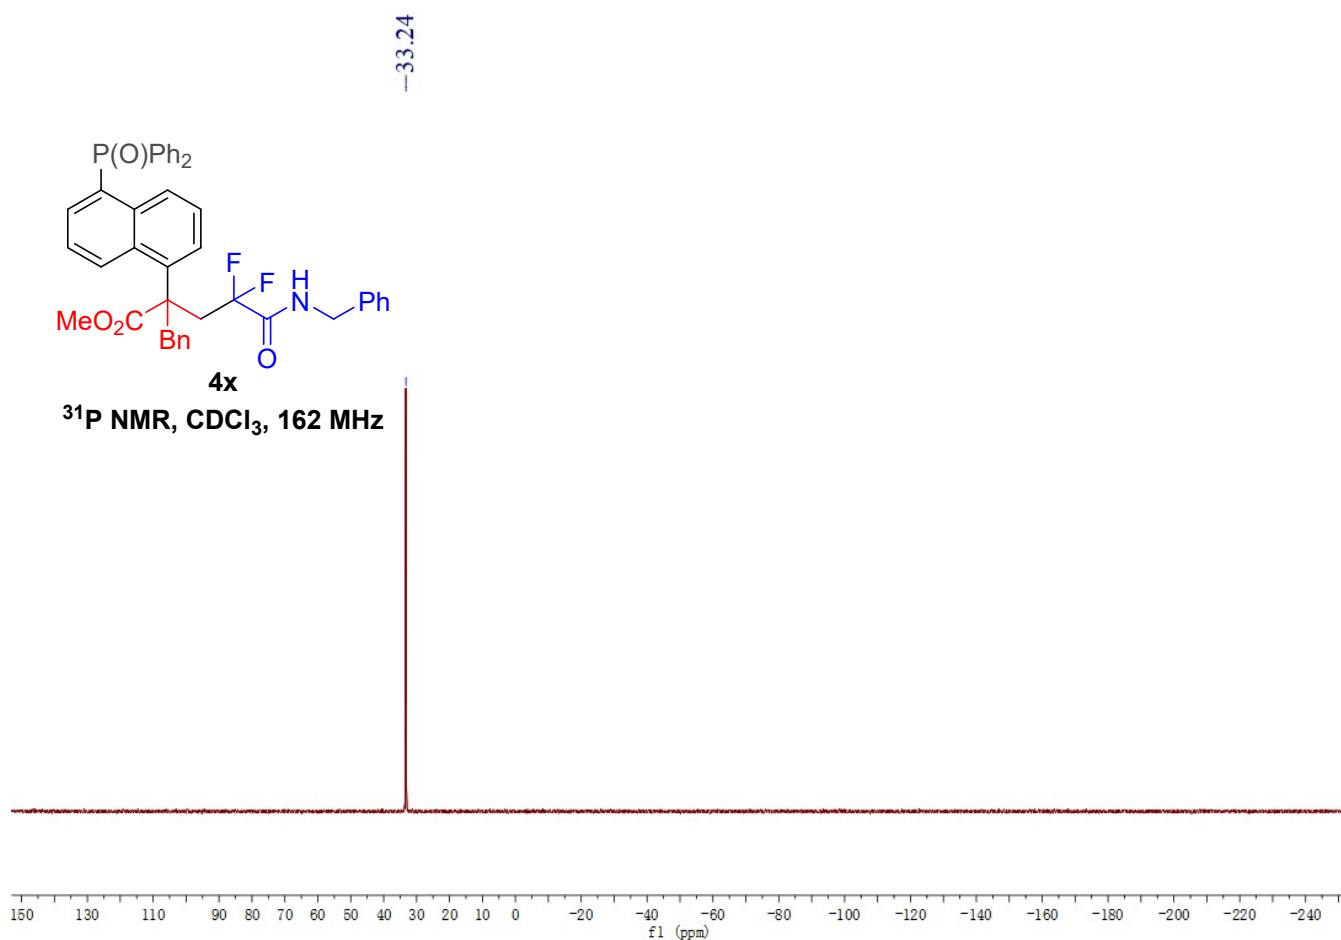

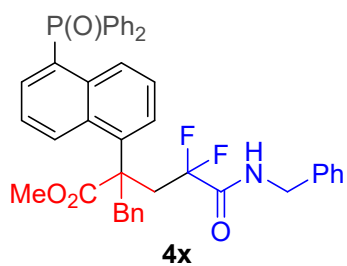

<sup>19</sup>F NMR, CDCl<sub>3</sub>, 377 MHz

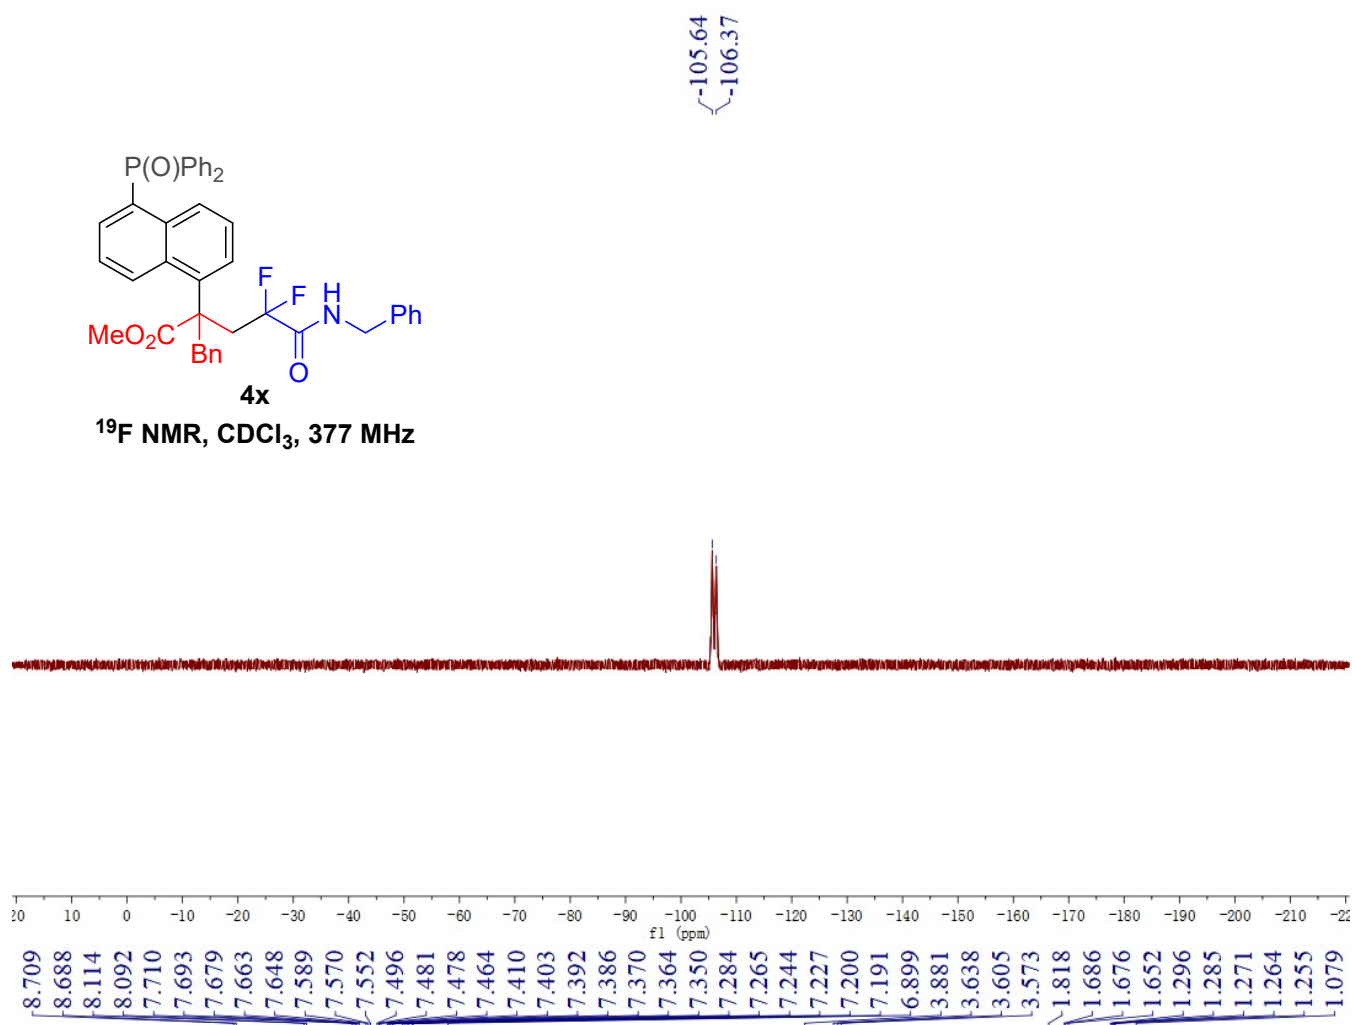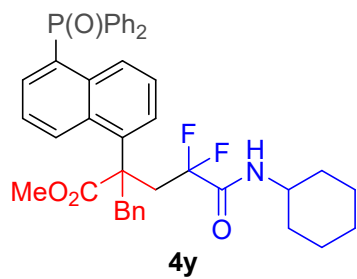

<sup>1</sup>H NMR, CDCl<sub>3</sub>, 400 MHz

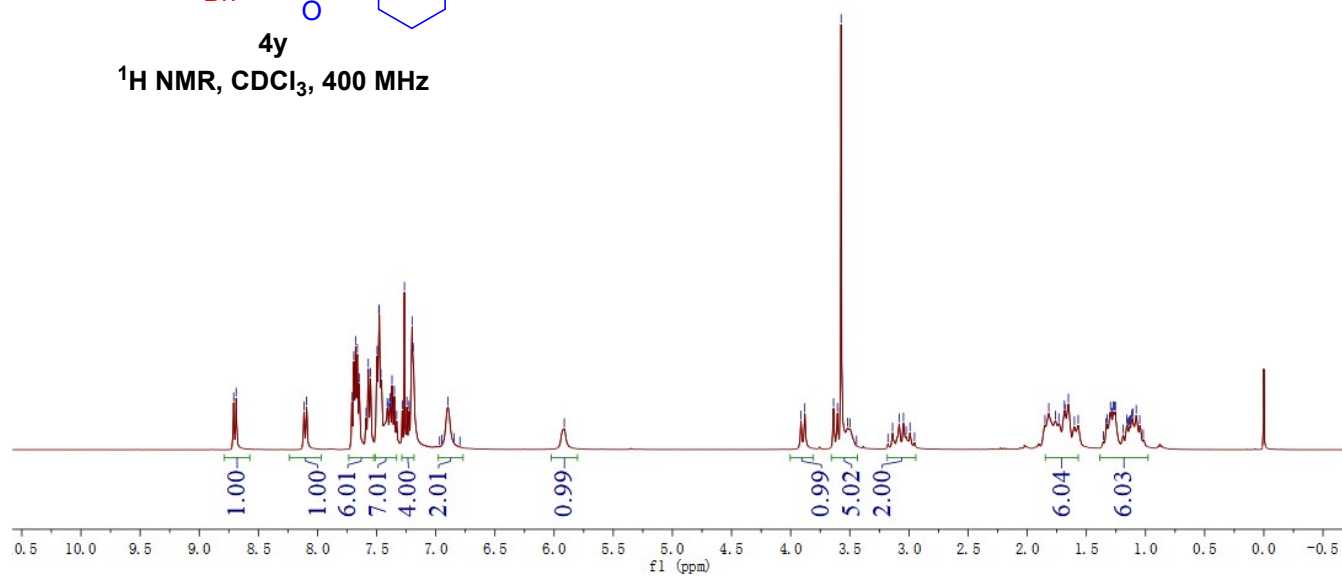



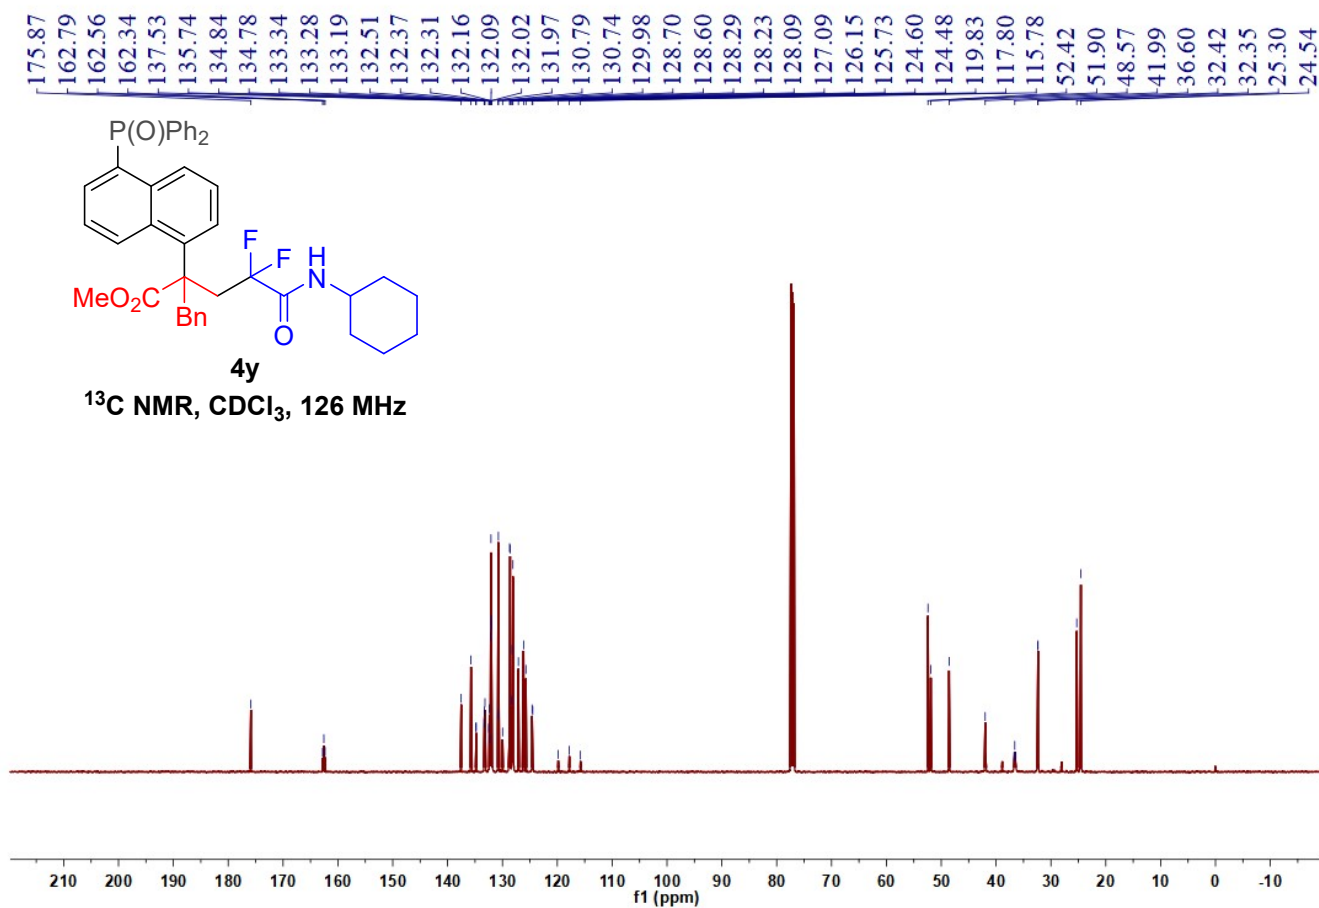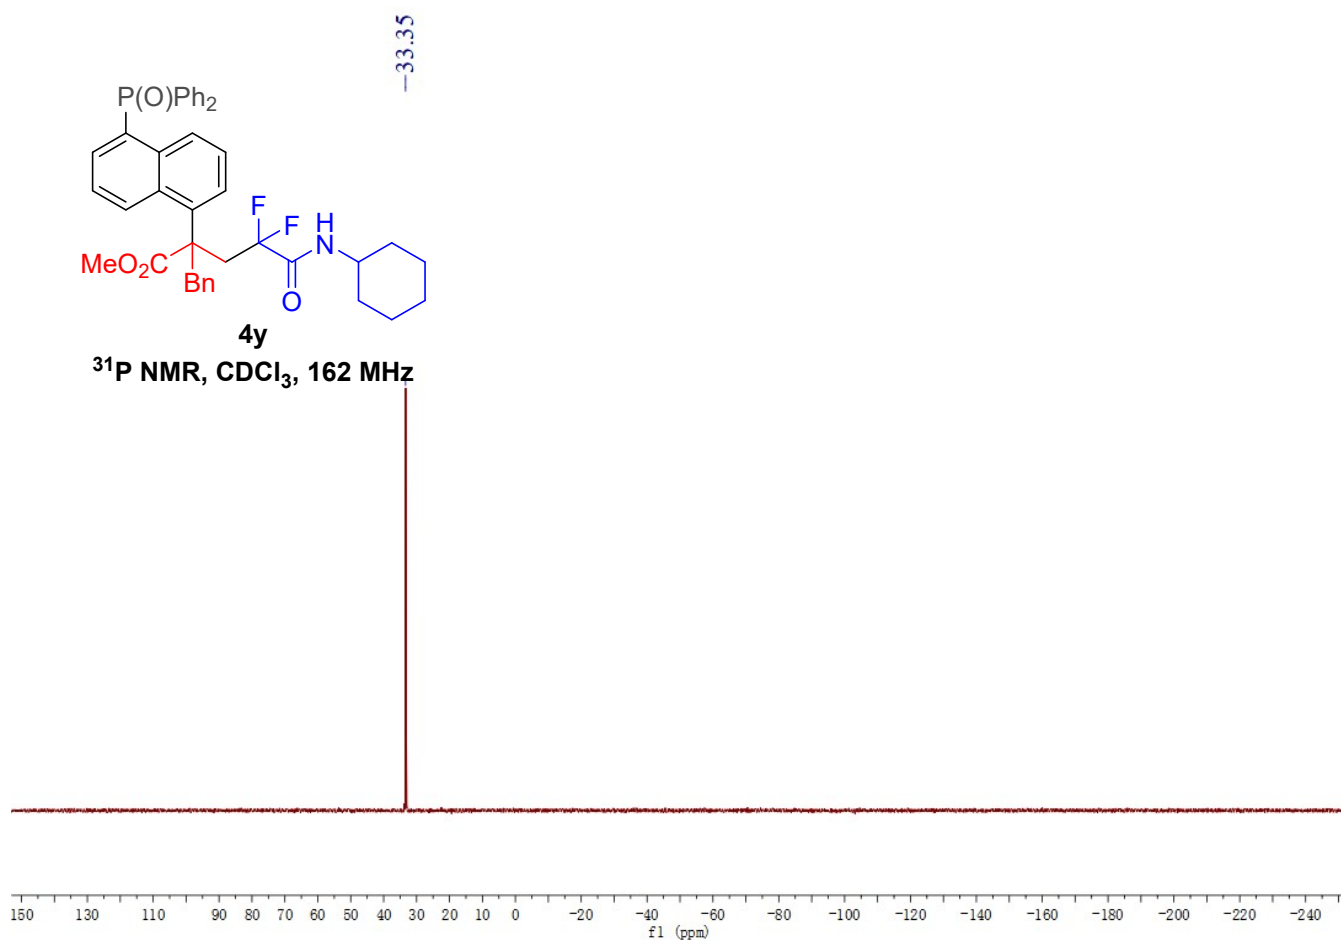

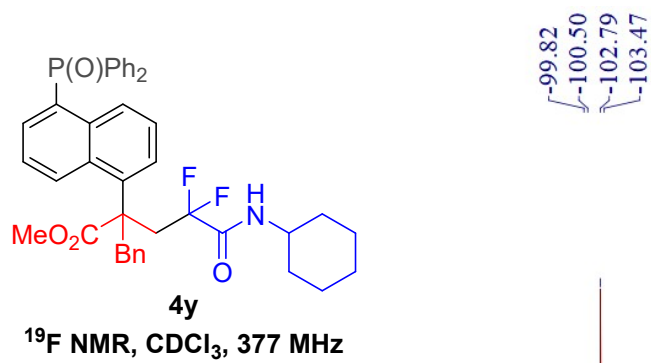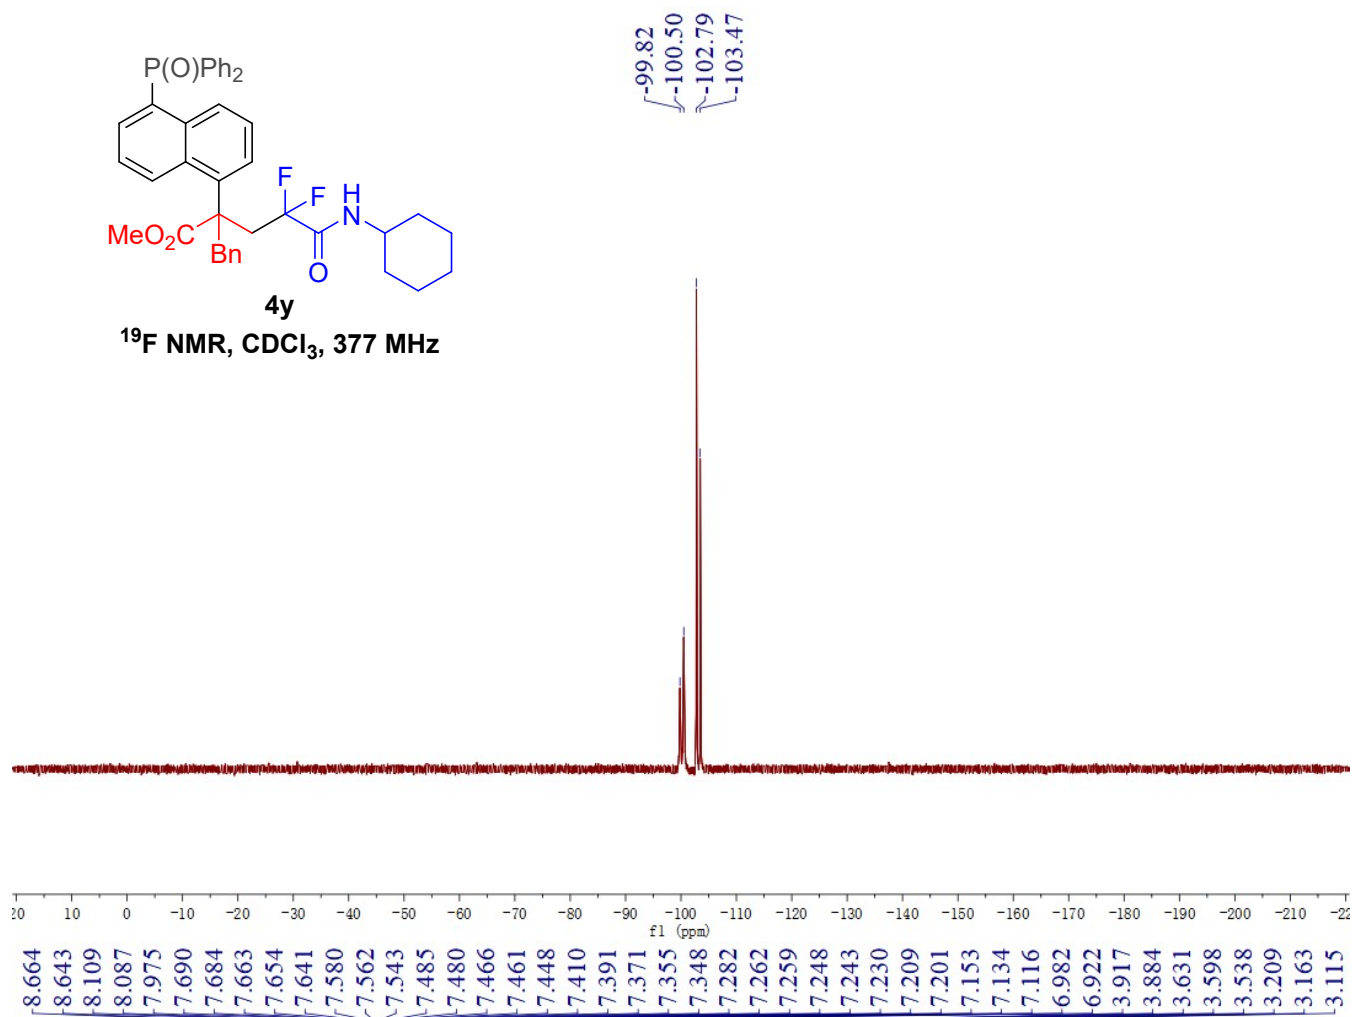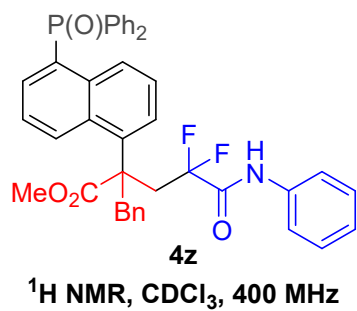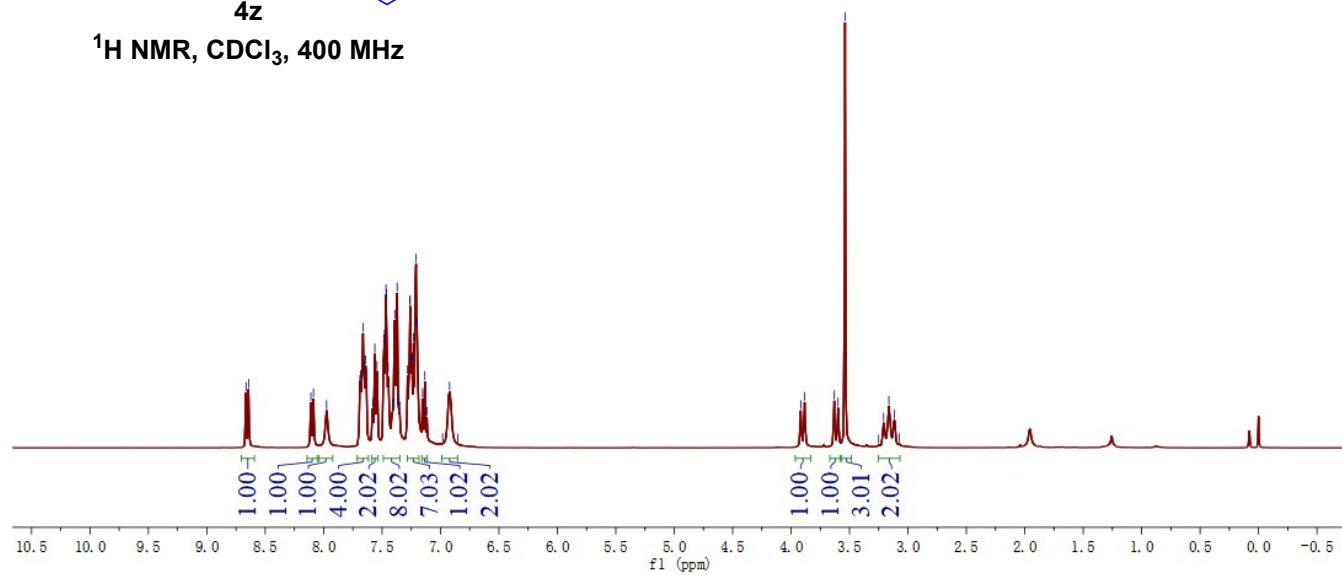

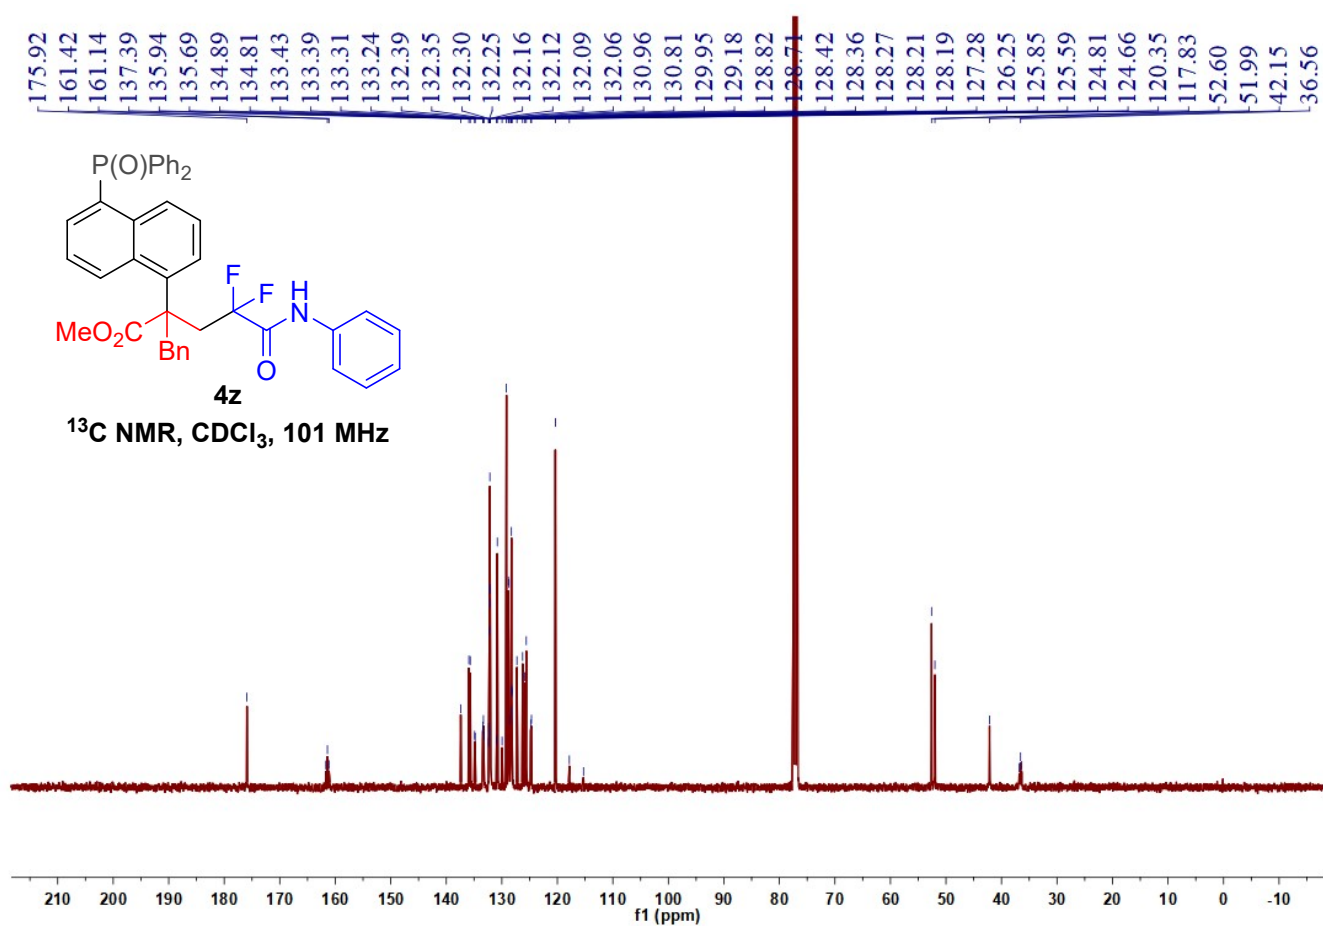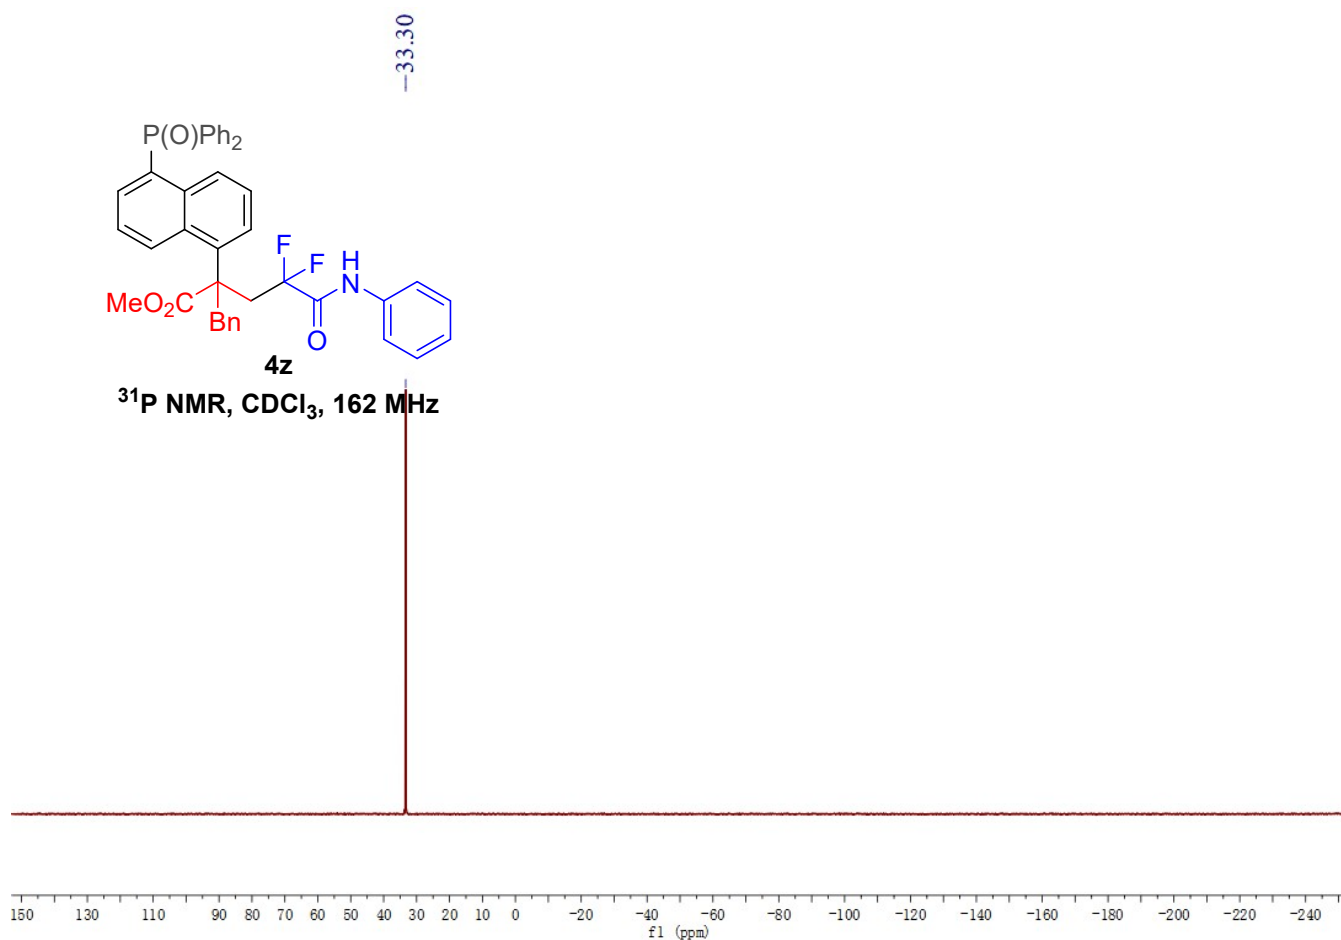

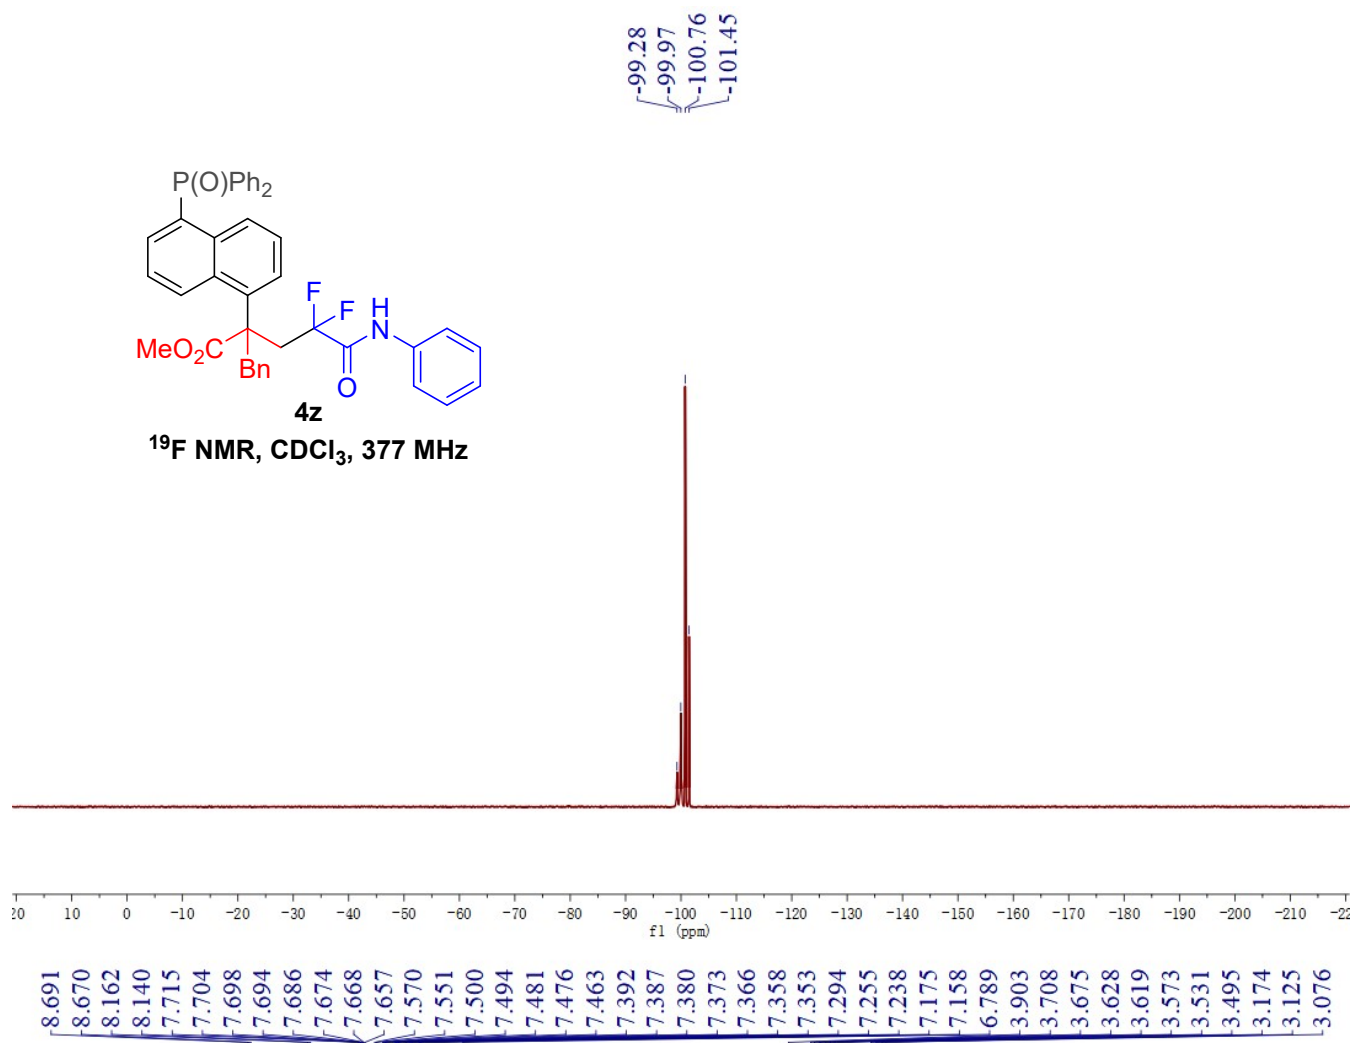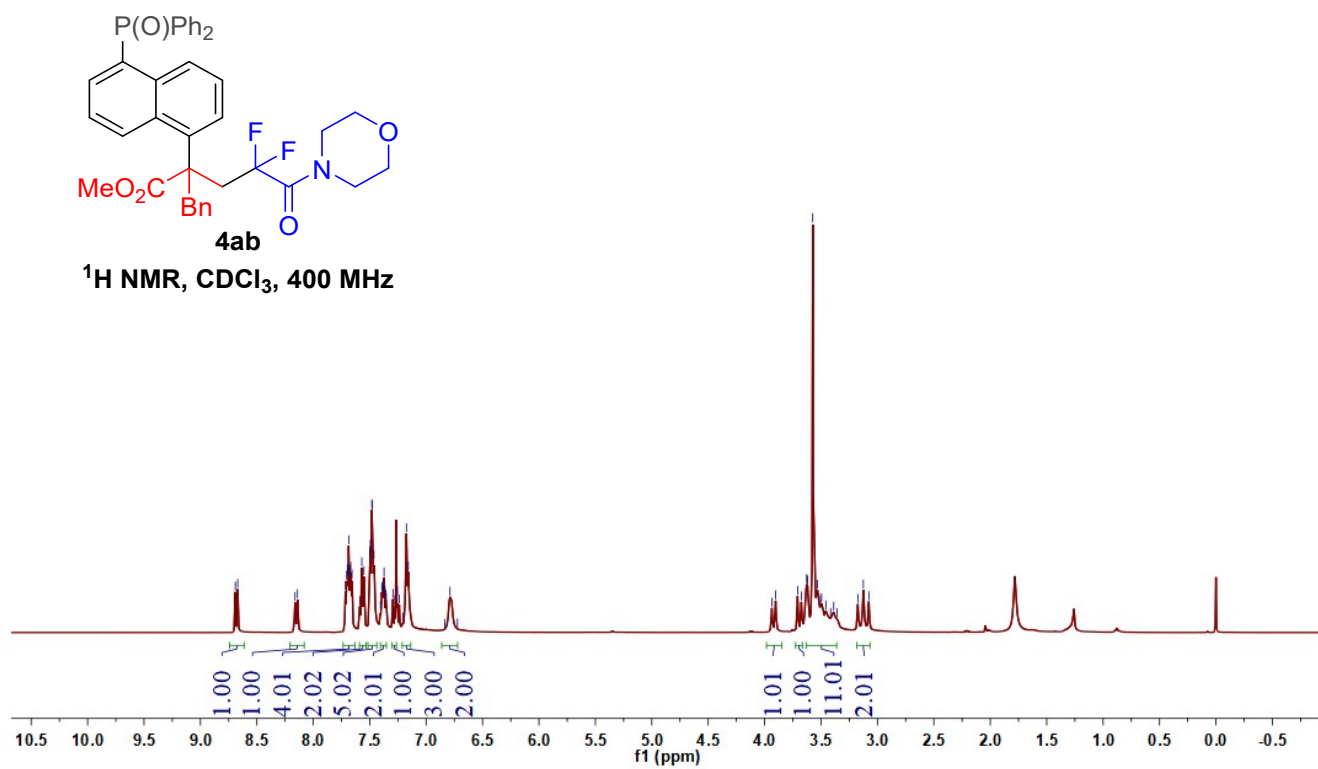

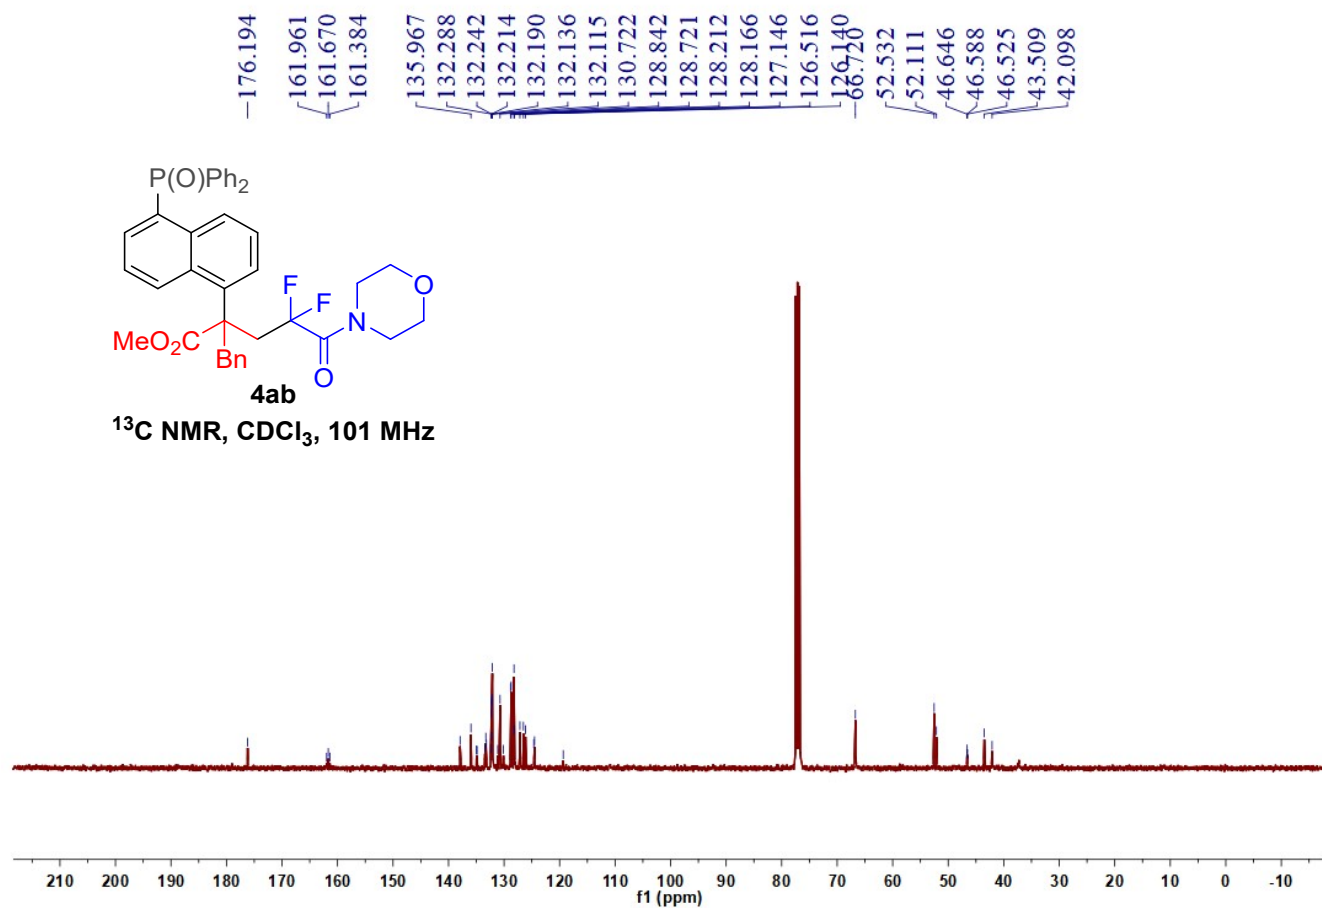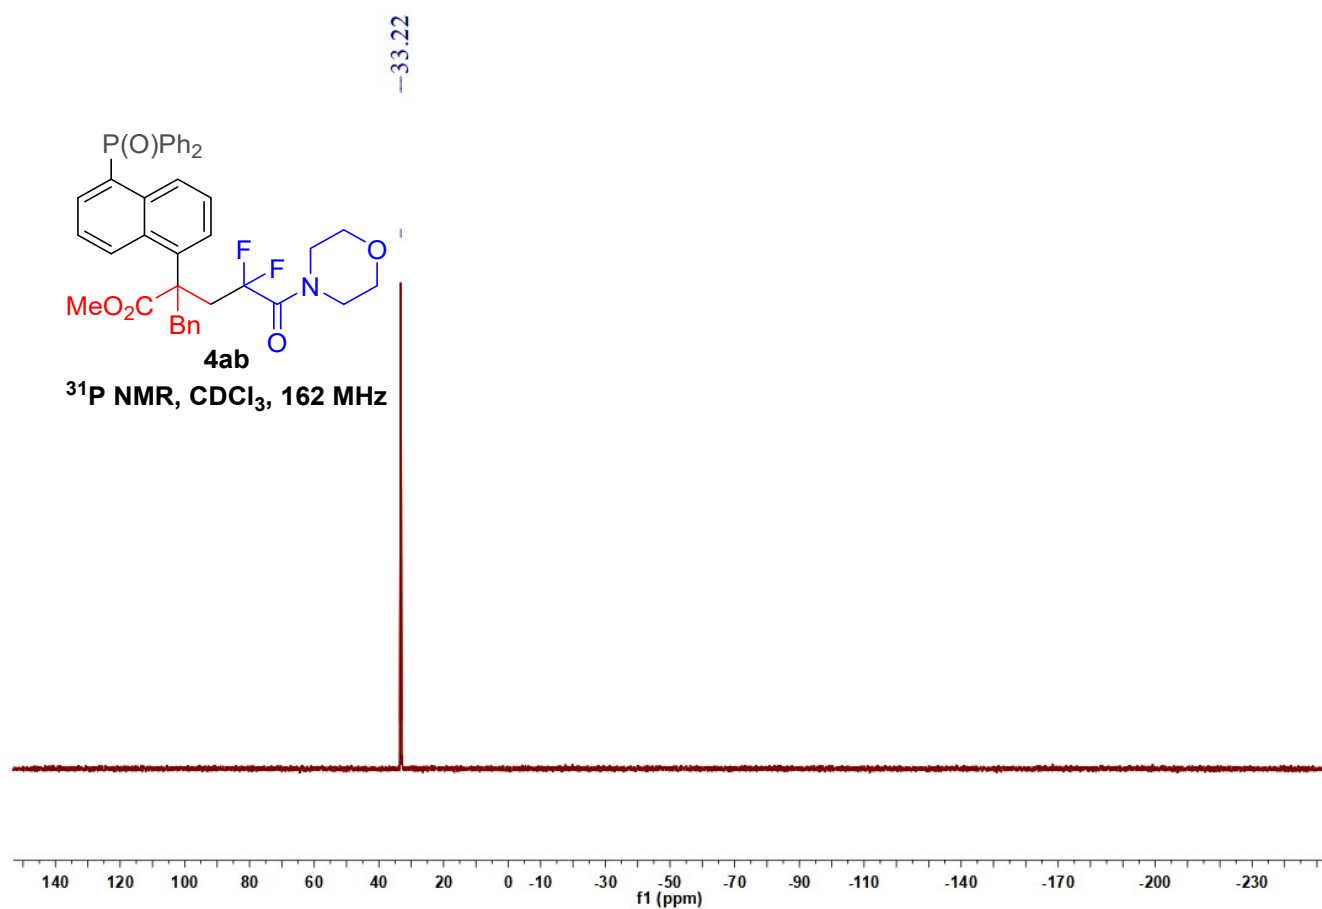

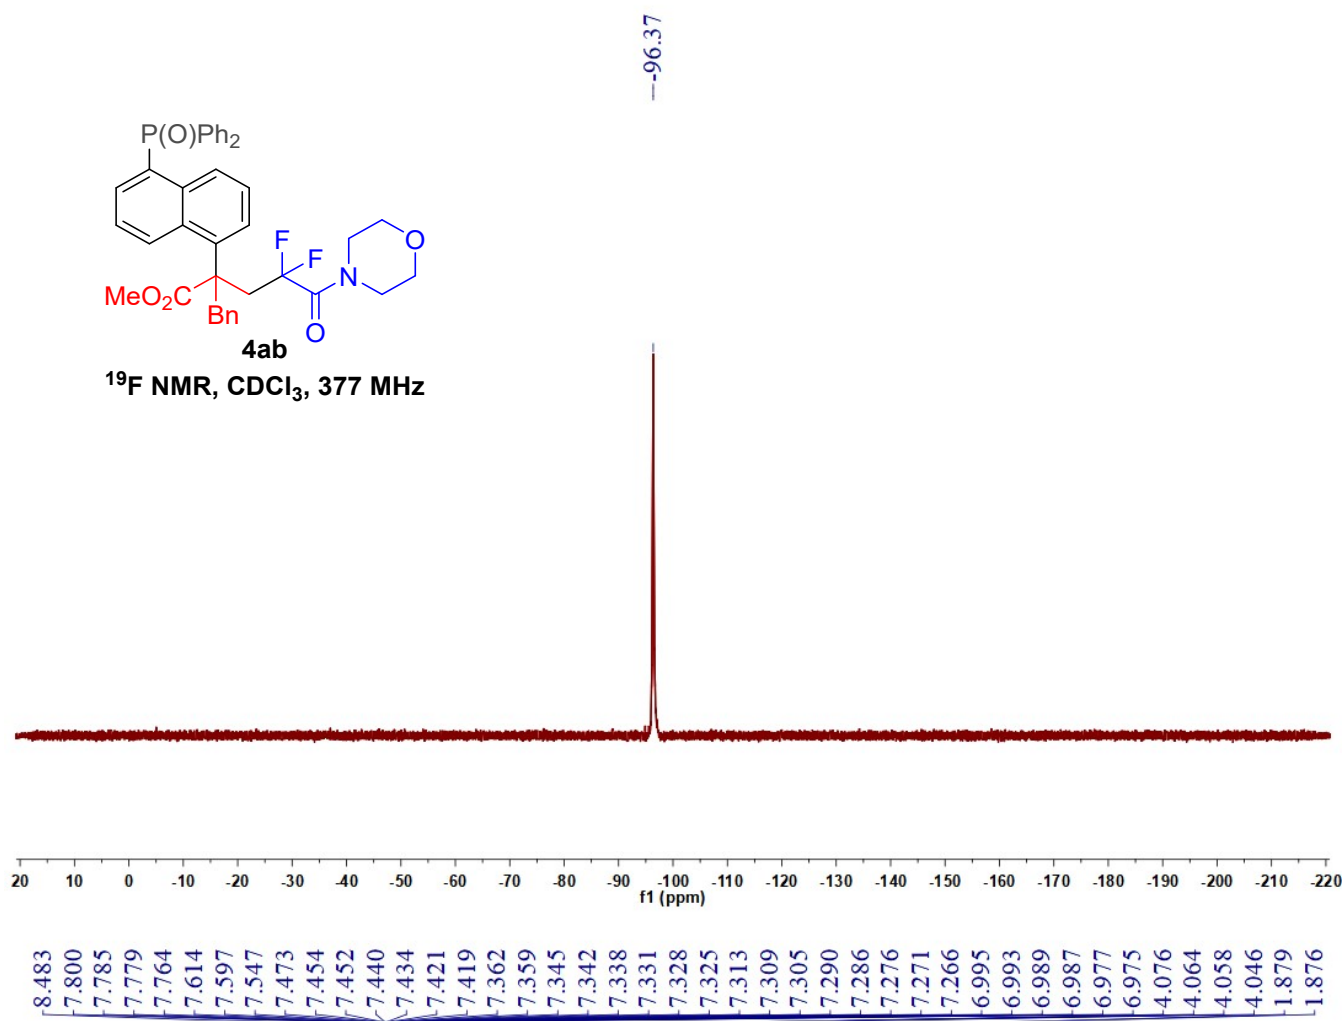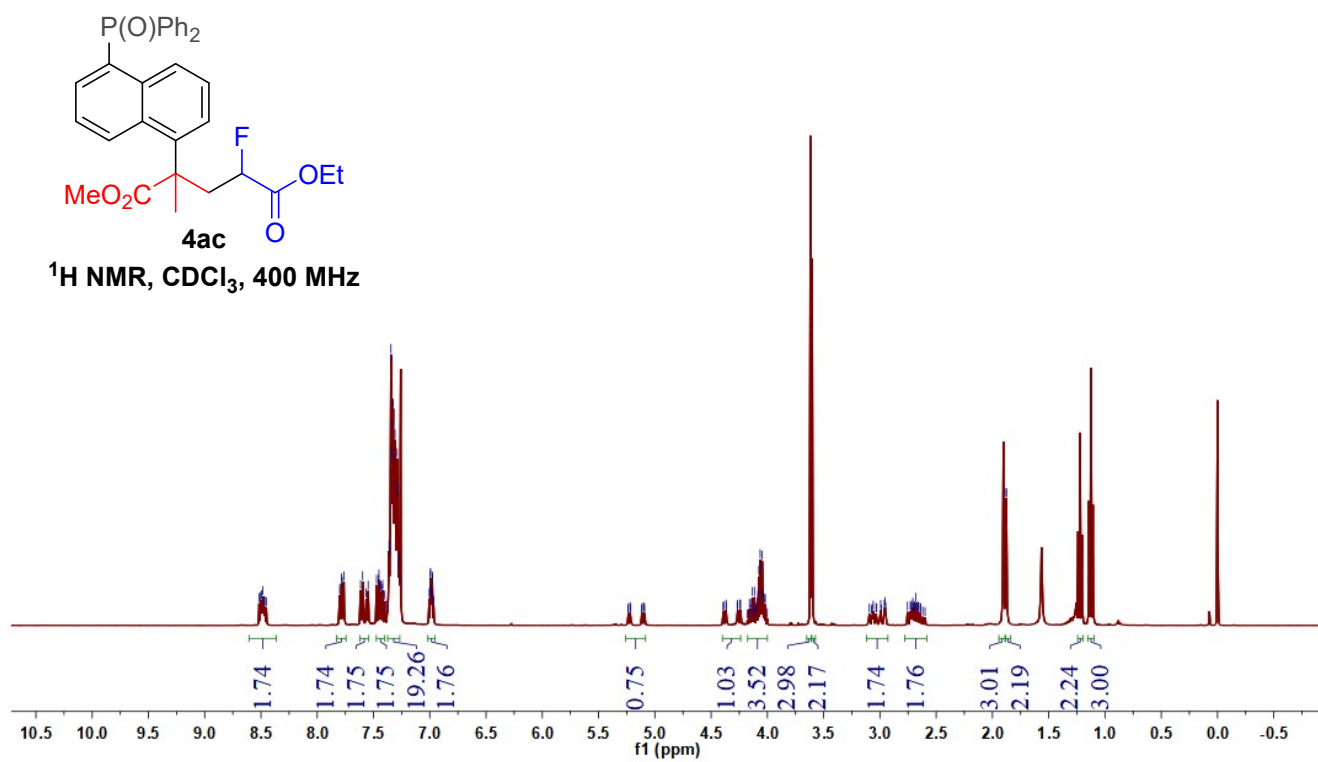

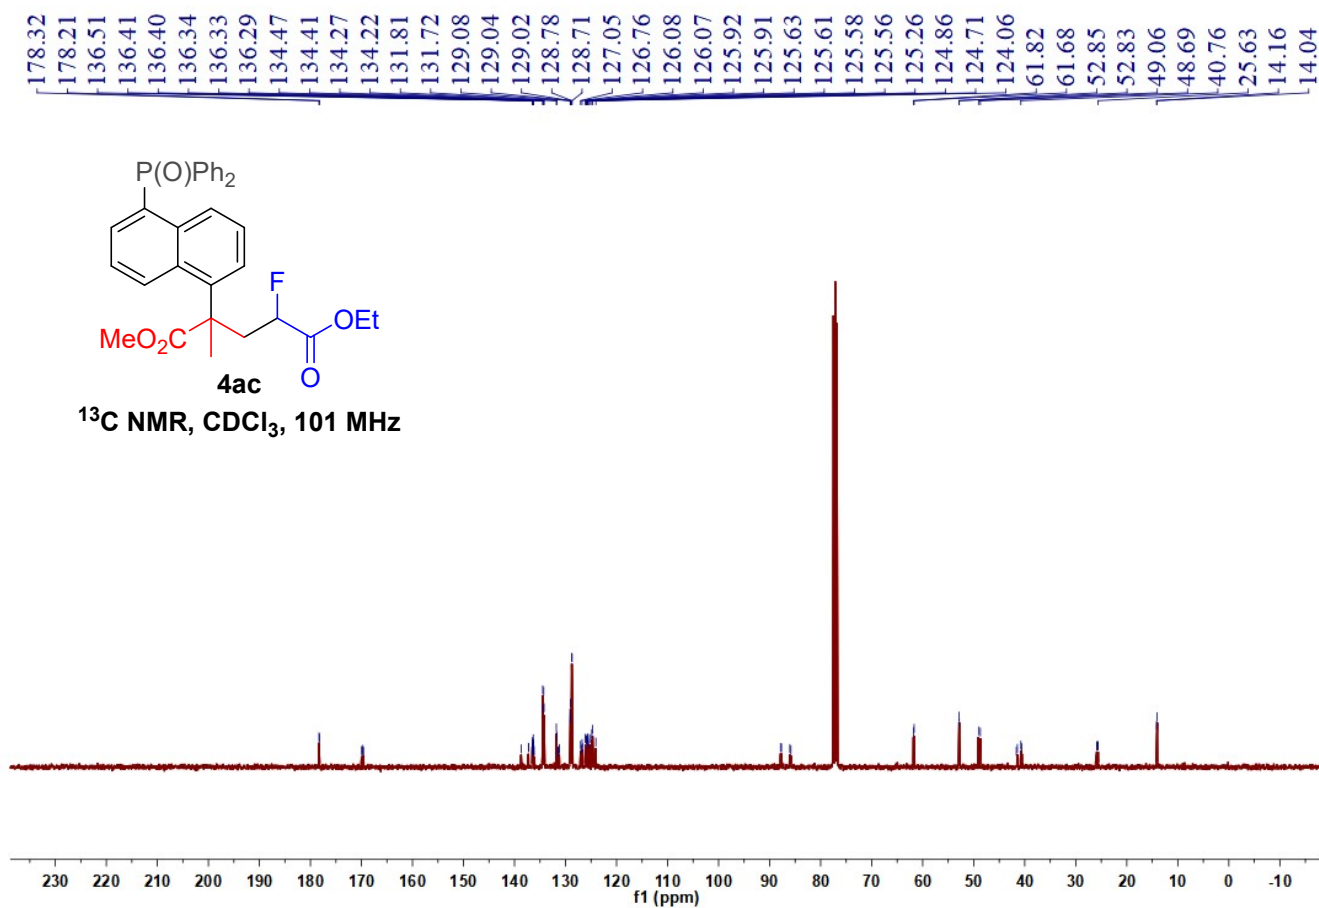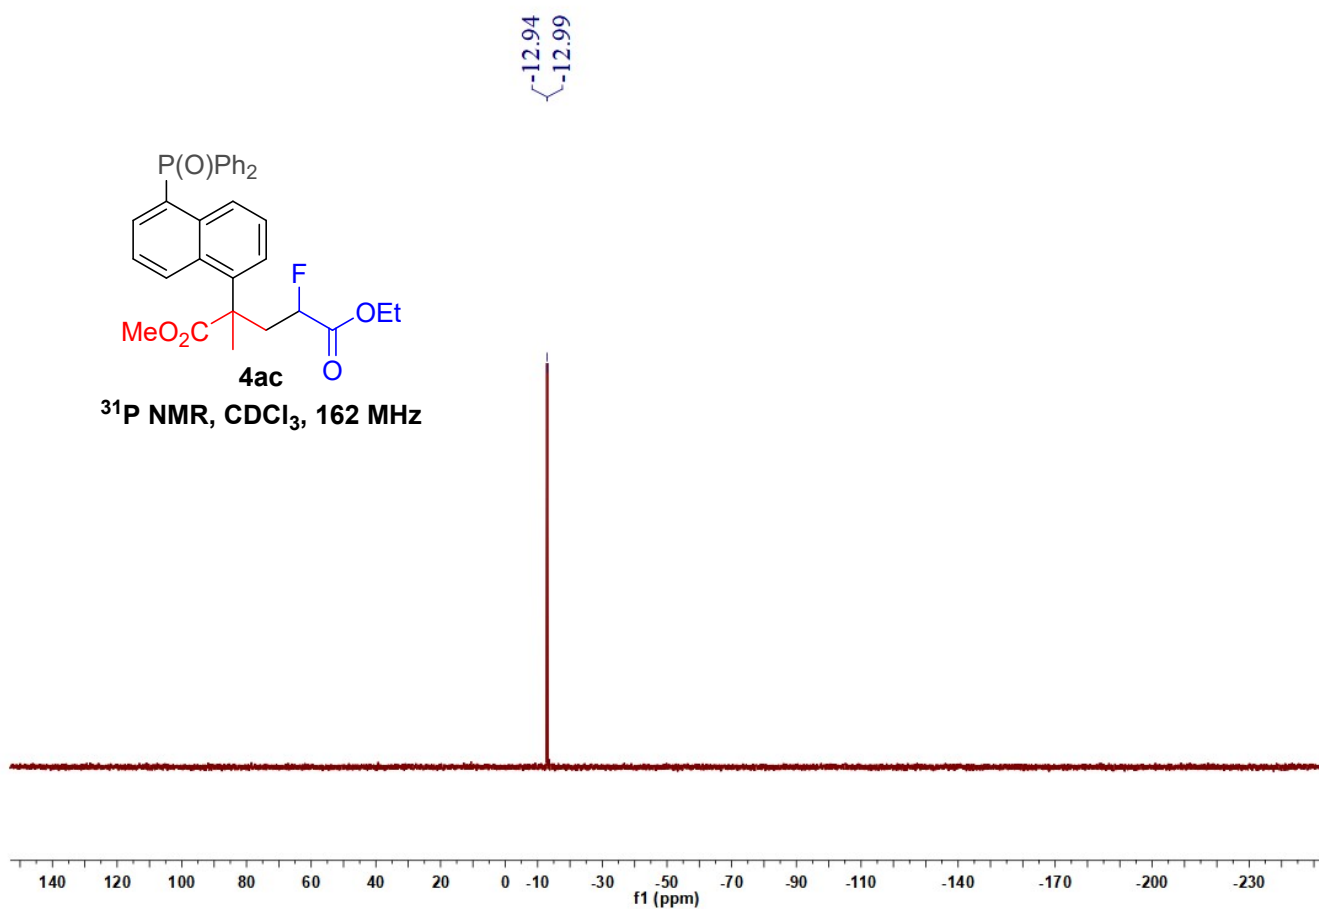



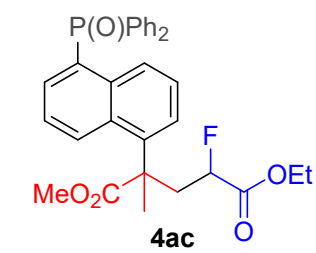

<sup>19</sup>F NMR, CDCl<sub>3</sub>, 377 MHz

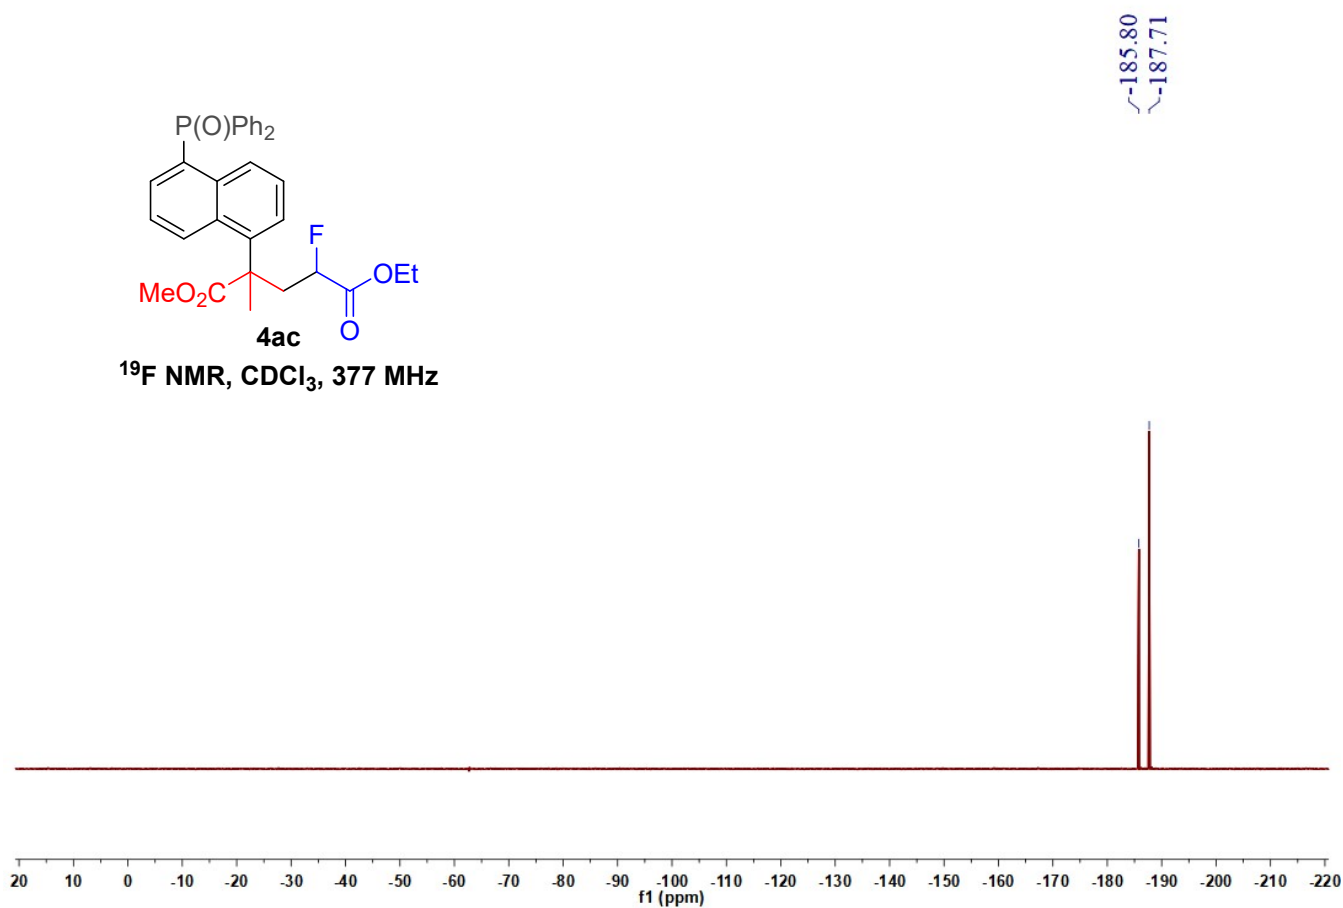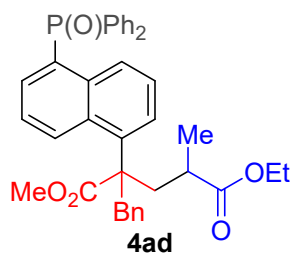

<sup>1</sup>H NMR, CDCl<sub>3</sub>, 400 MHz

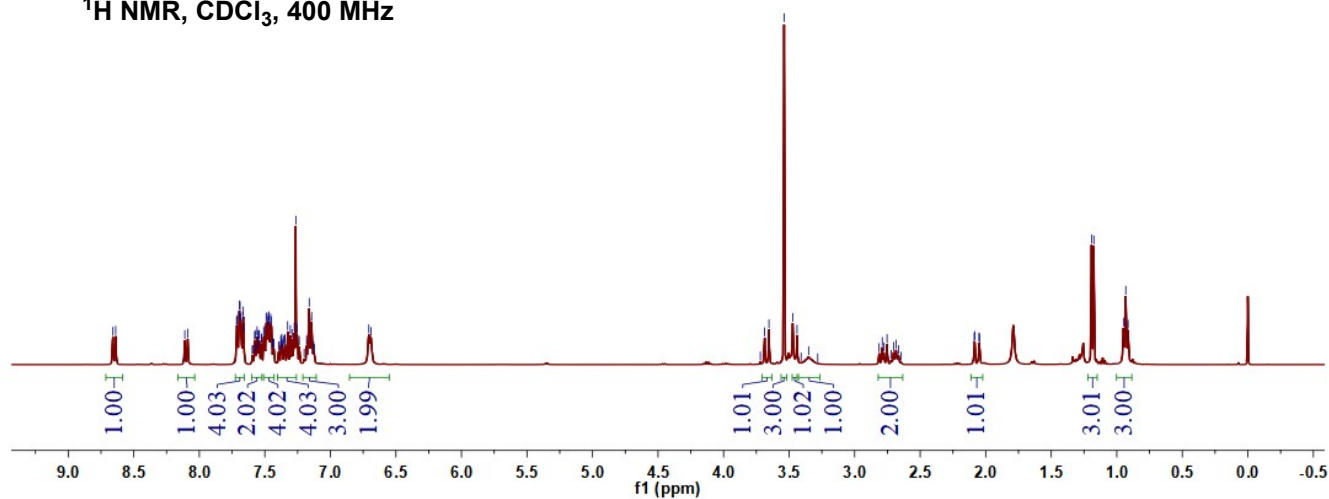

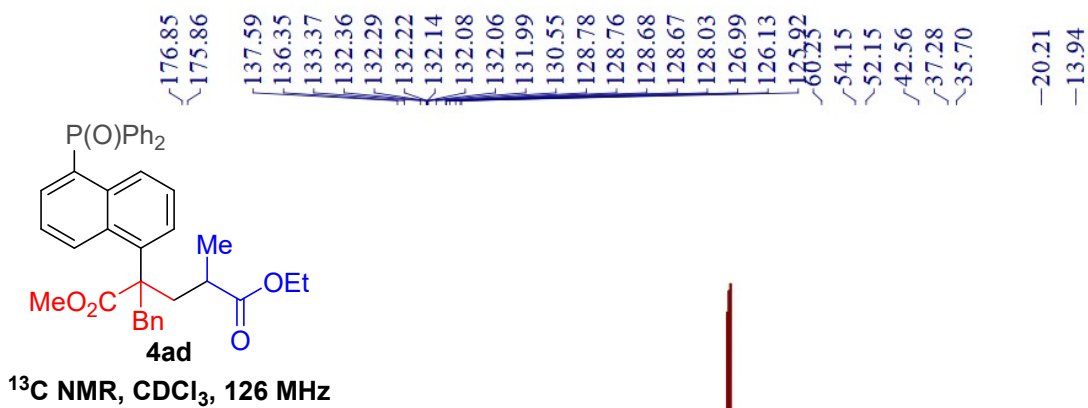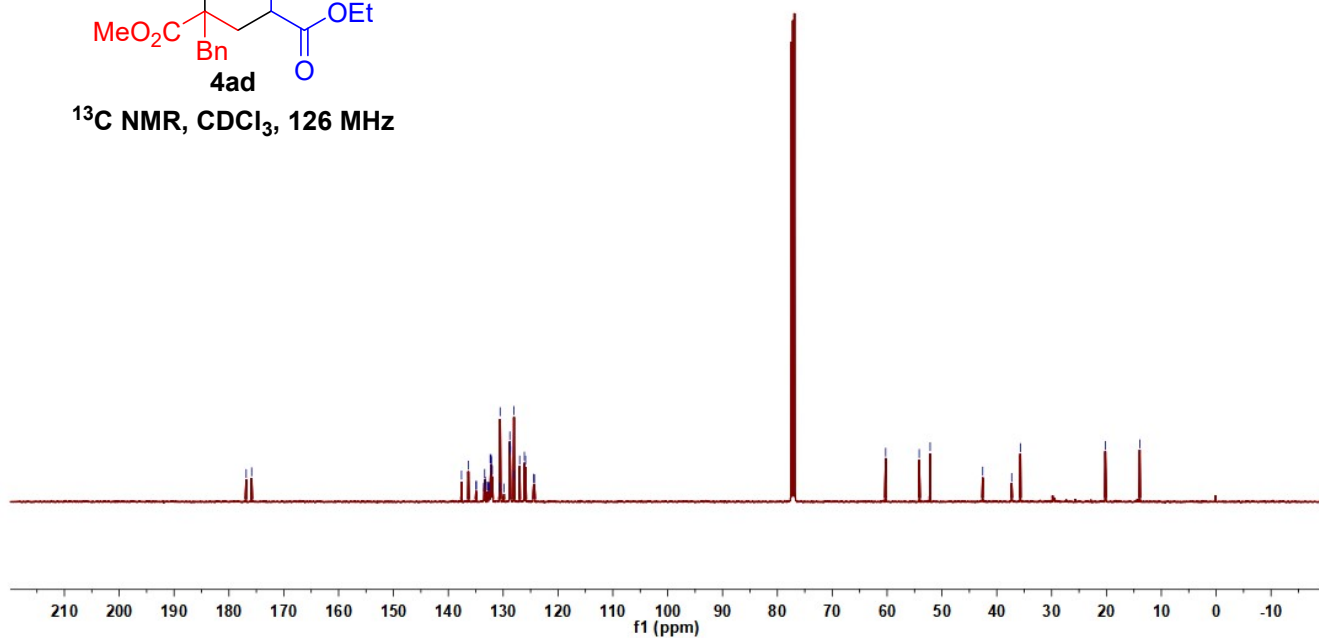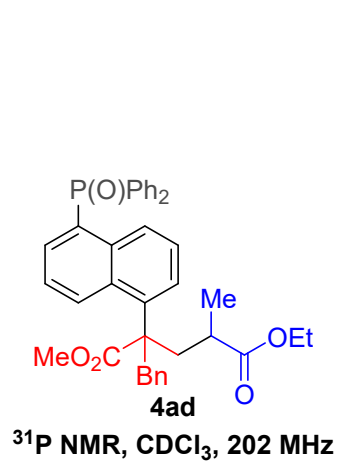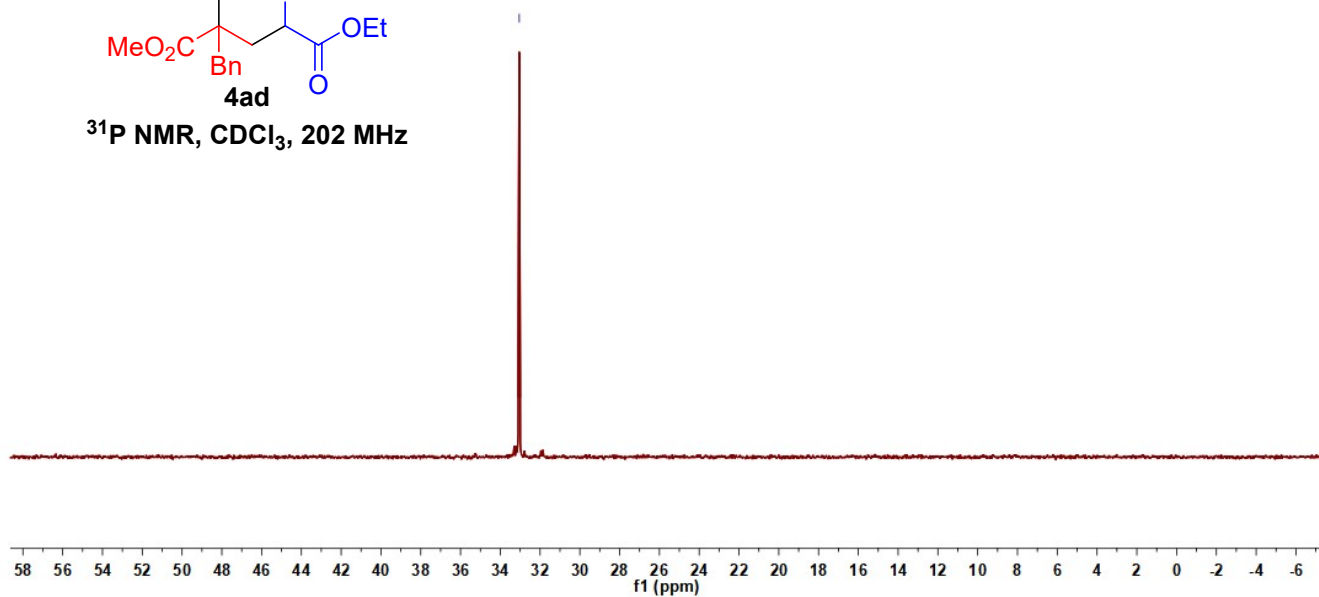

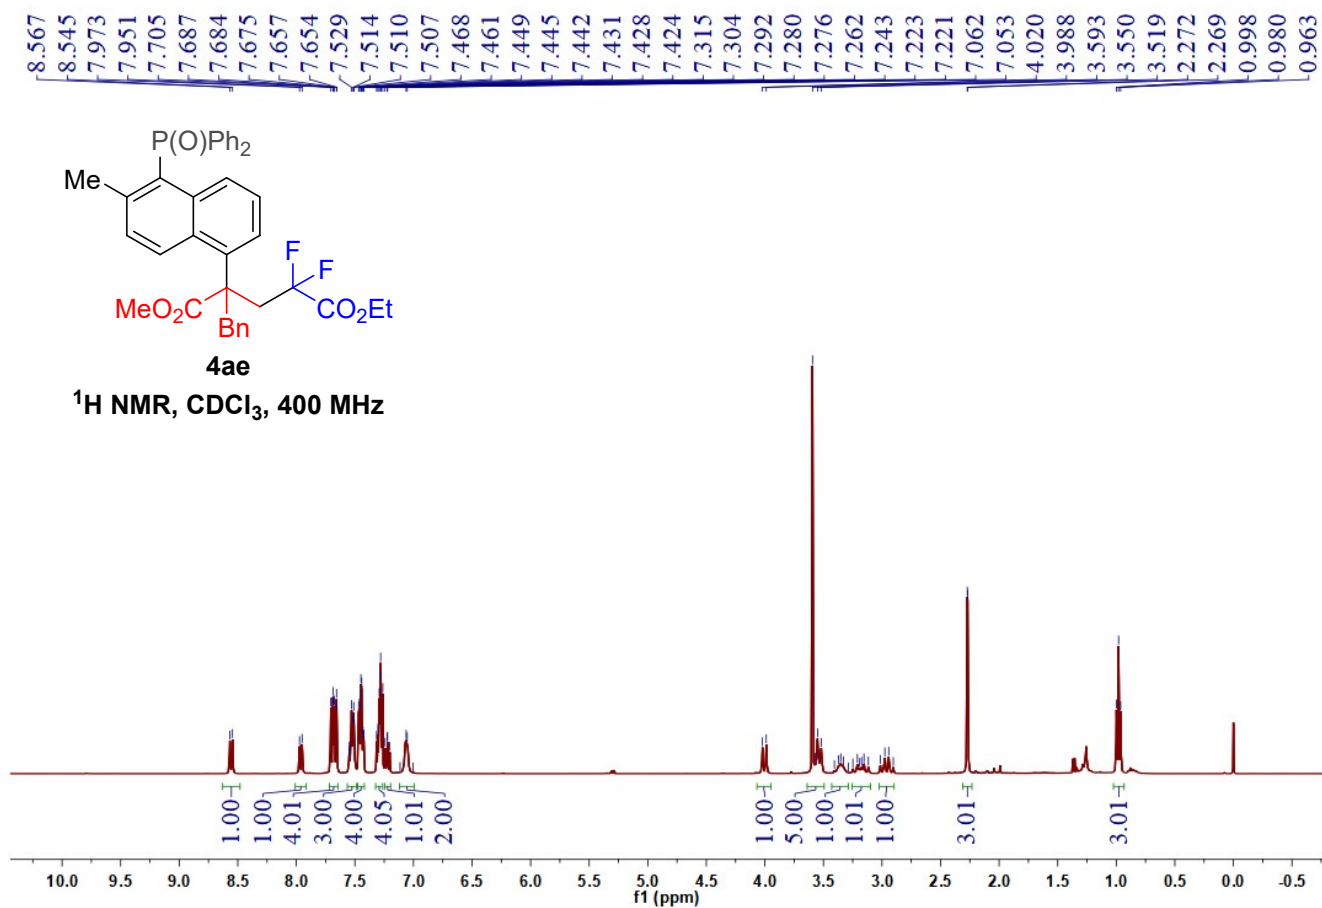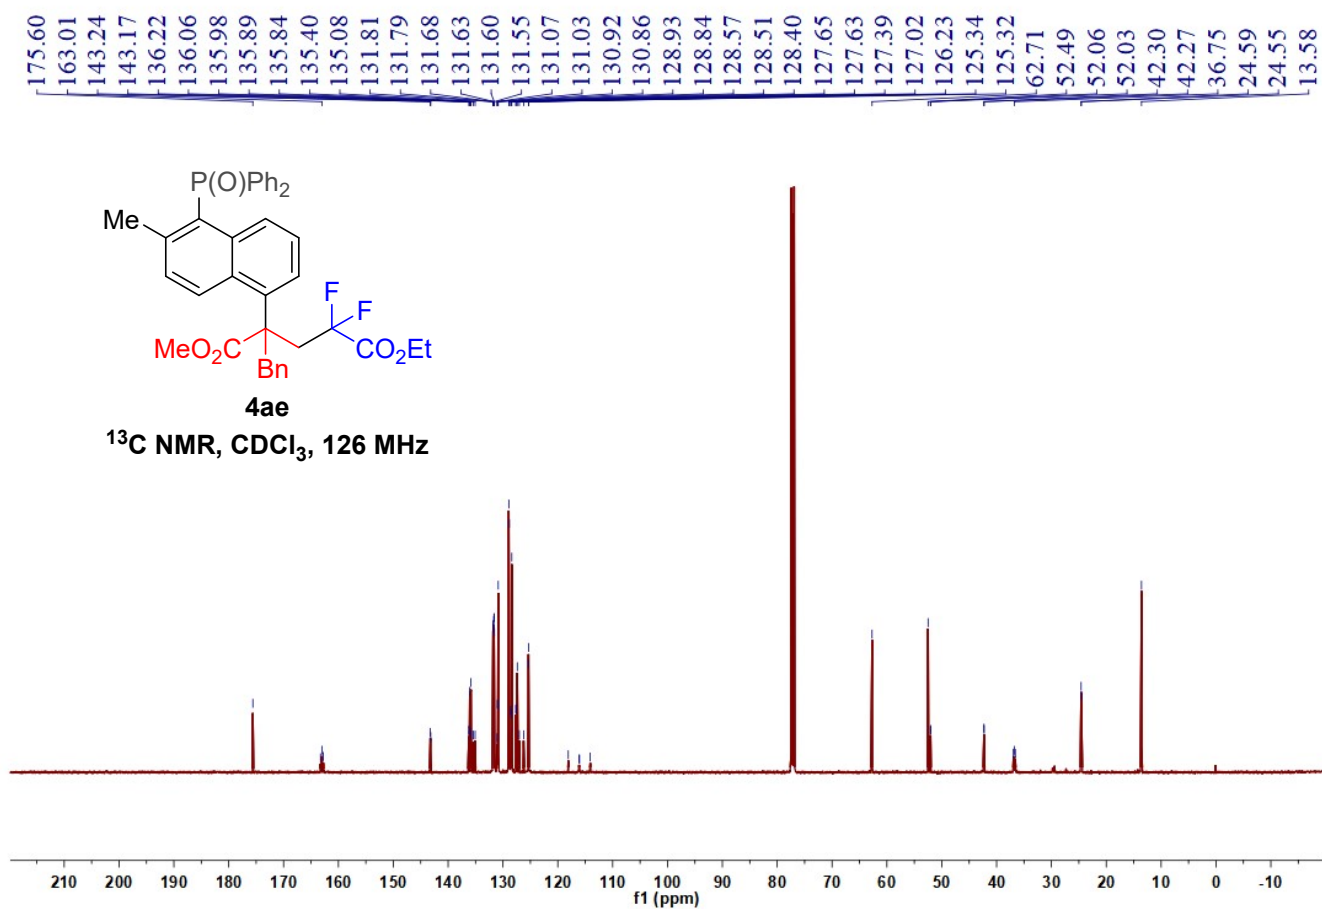

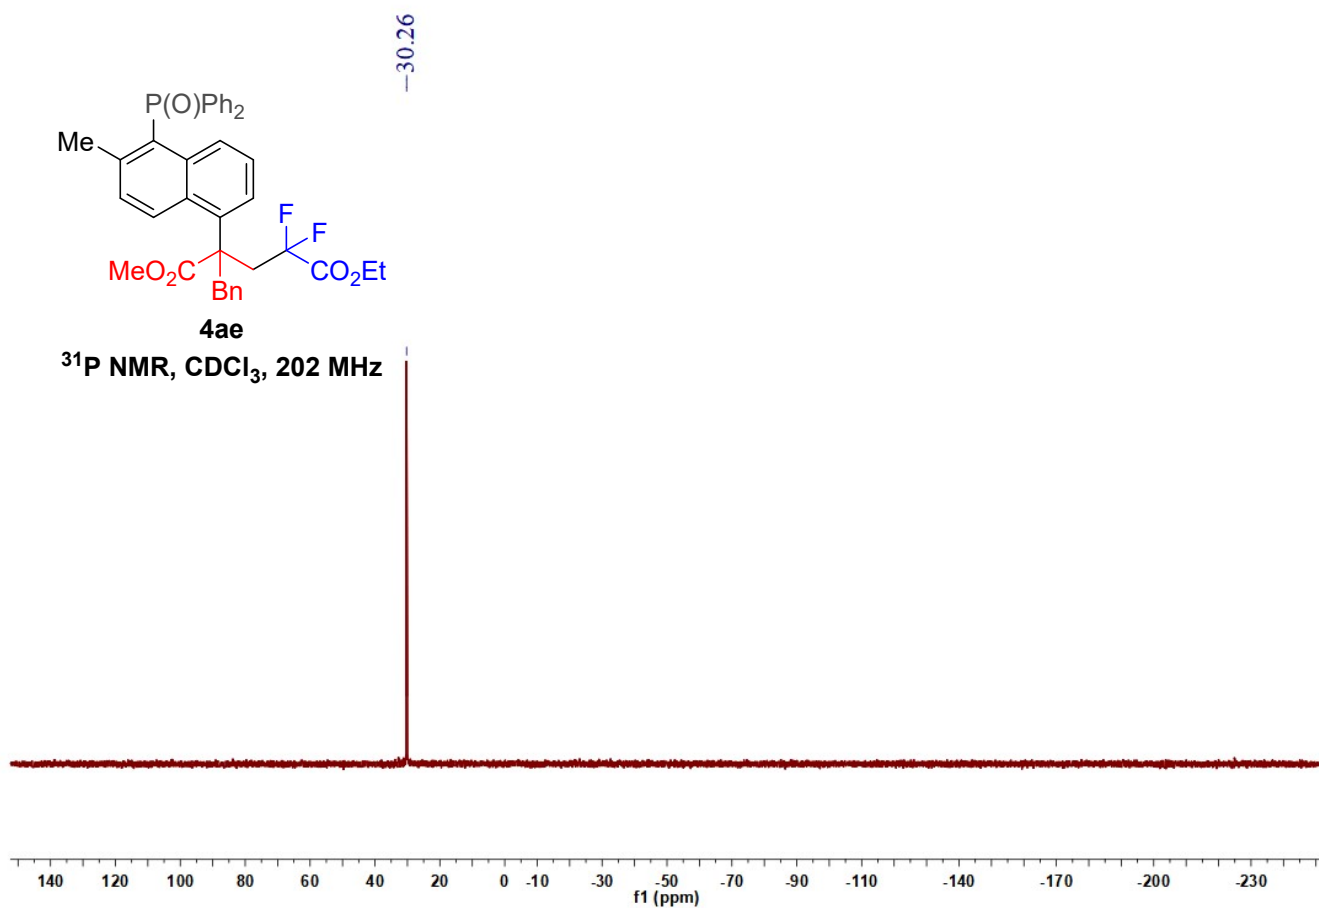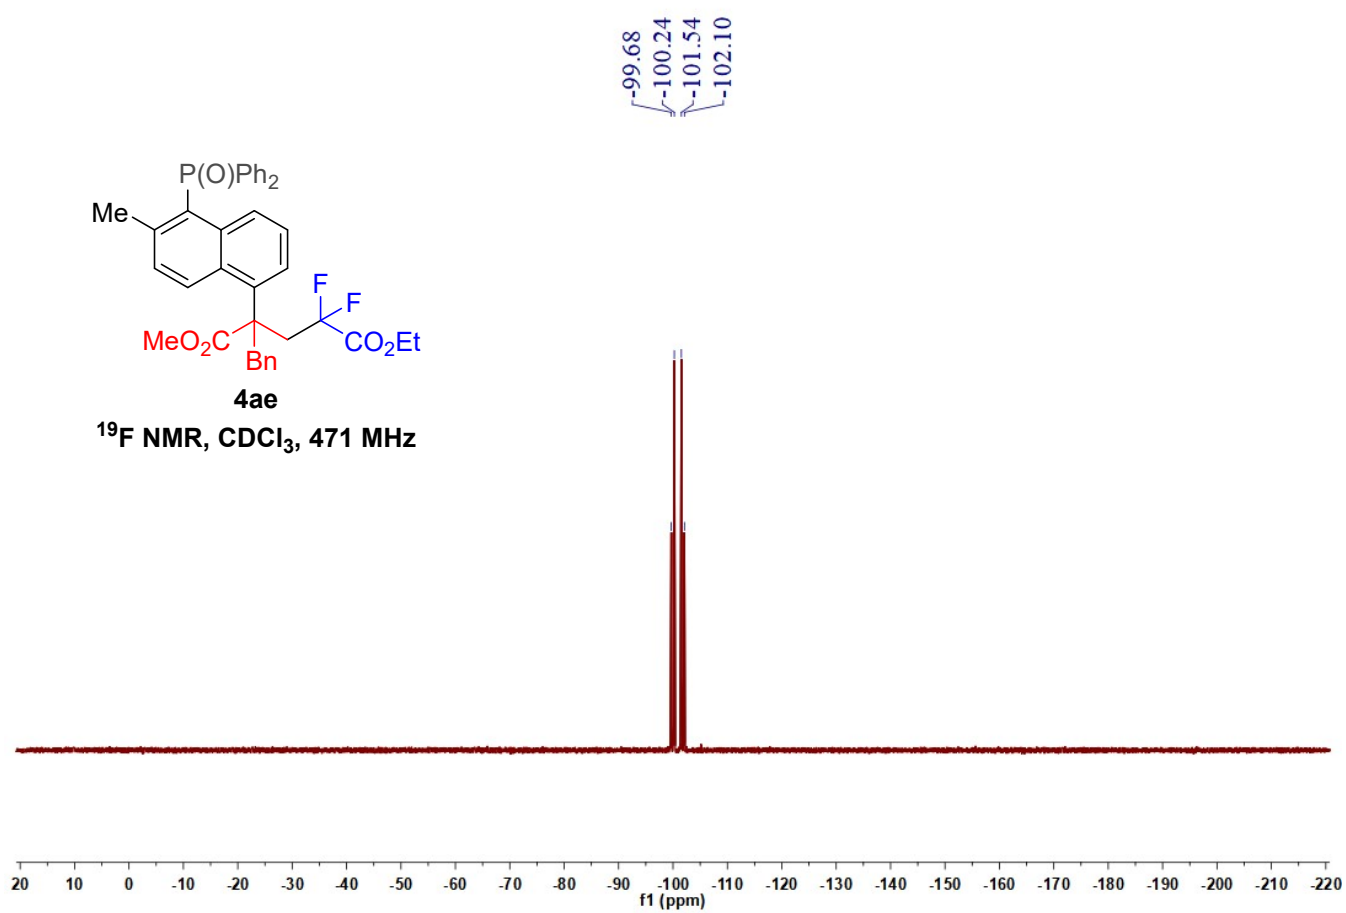

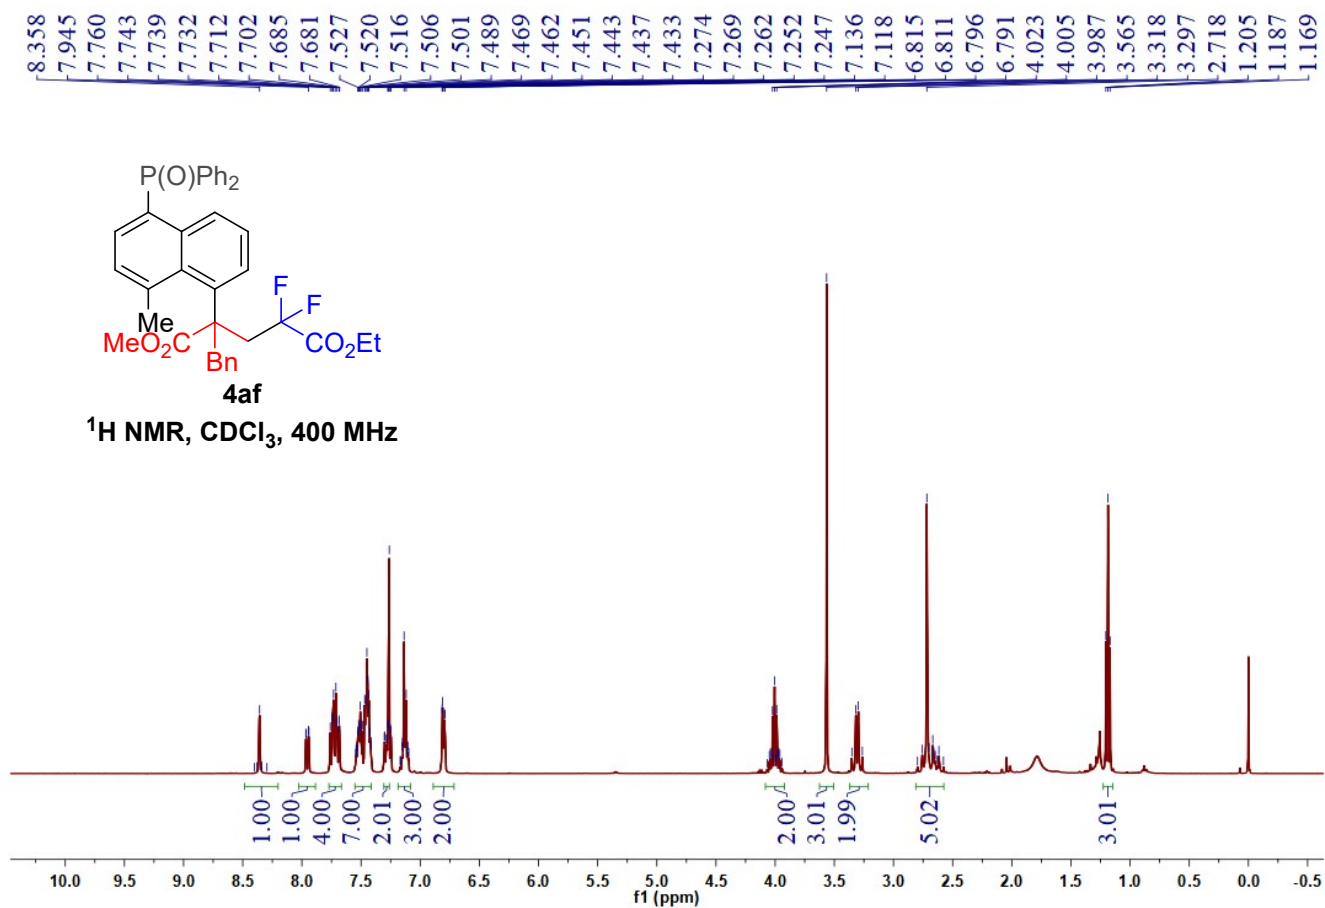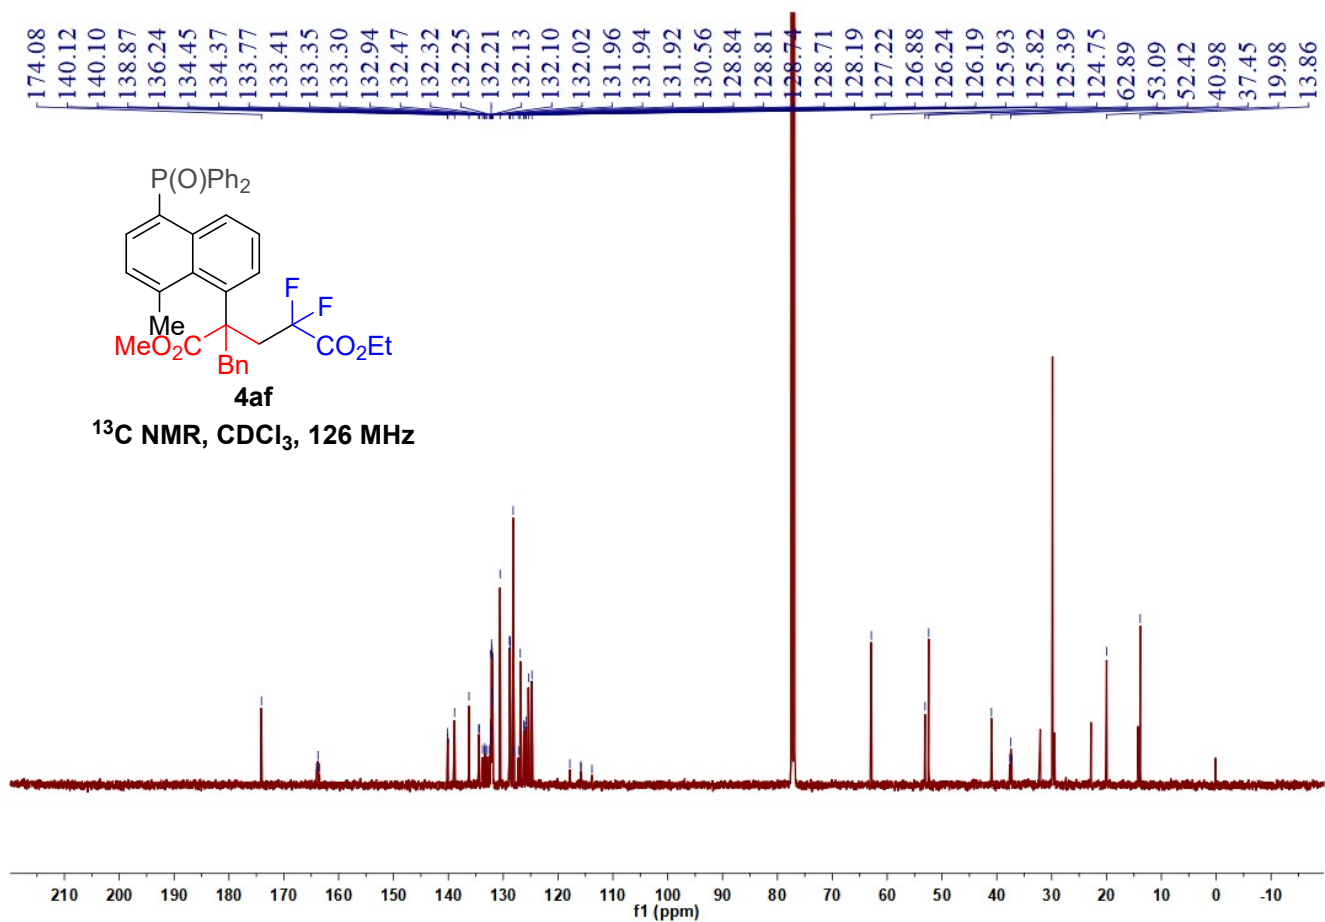

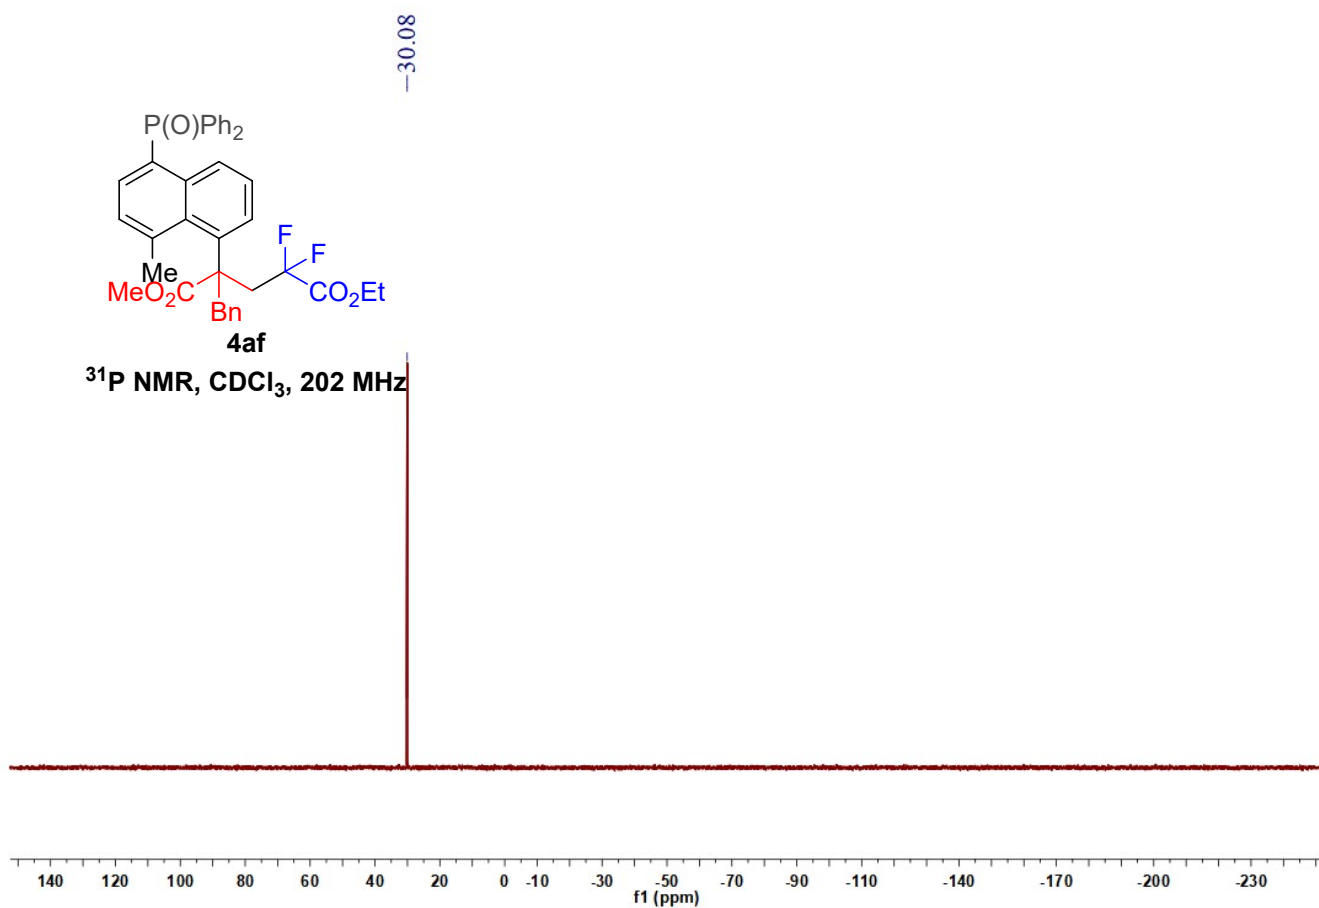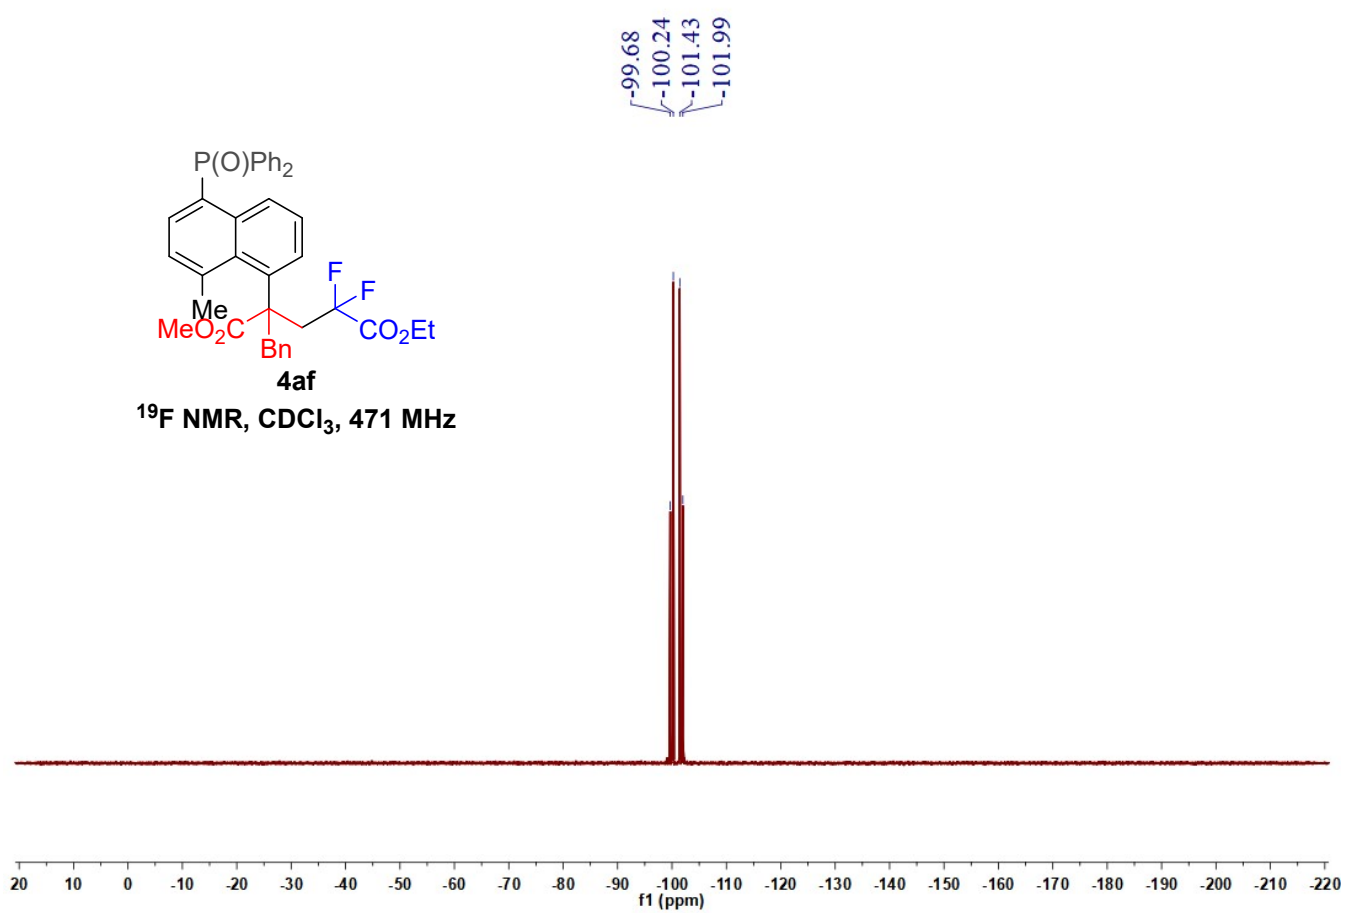

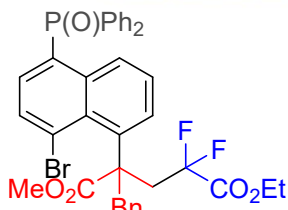

**4ag**

<sup>1</sup>H NMR, CDCl<sub>3</sub>, 400 MHz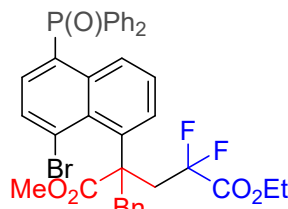

**4ag**

<sup>13</sup>C NMR, CDCl<sub>3</sub>, 126 MHz



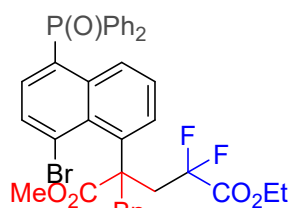

**4ag**

$^{31}\text{P}$  NMR,  $\text{CDCl}_3$ , 202 MHz

-32.71

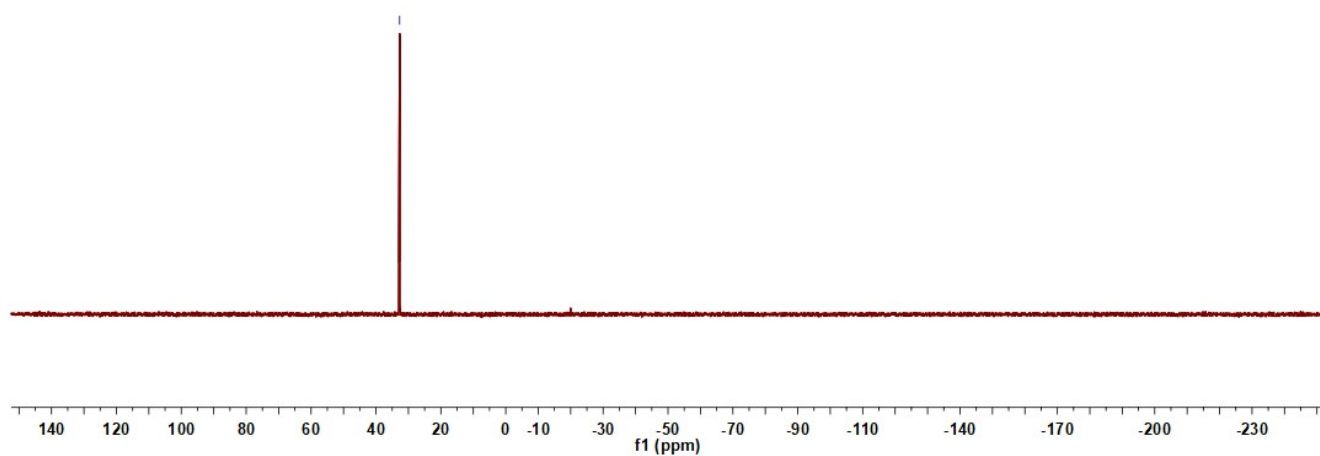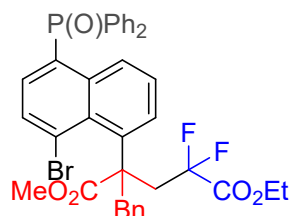

**4ag**

$^{19}\text{F}$  NMR,  $\text{CDCl}_3$ , 471 MHz

-105.46  
-106.03

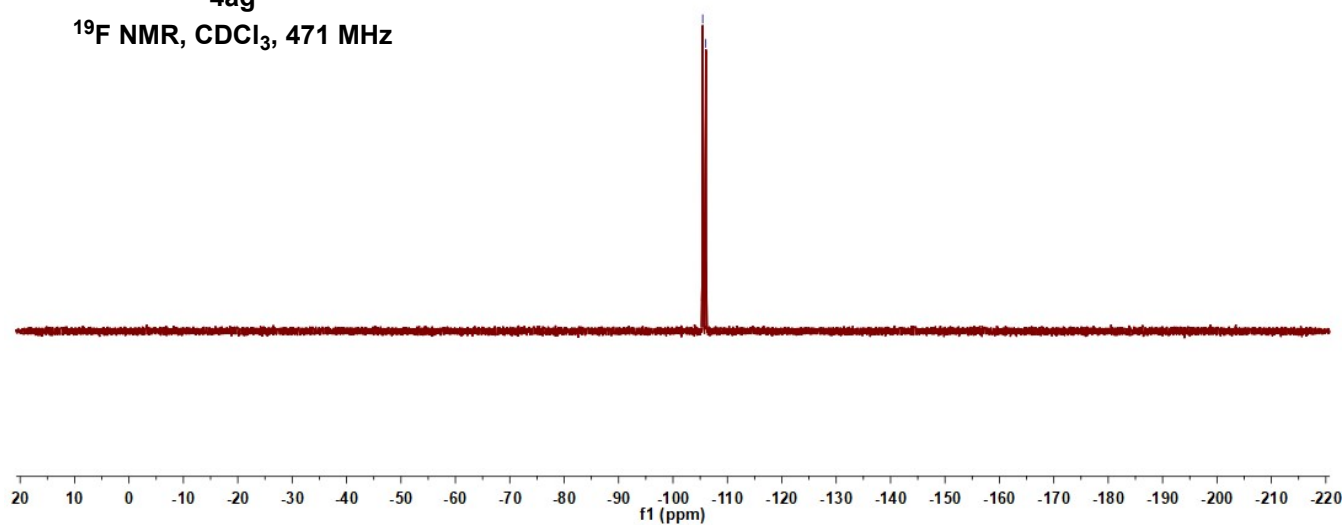

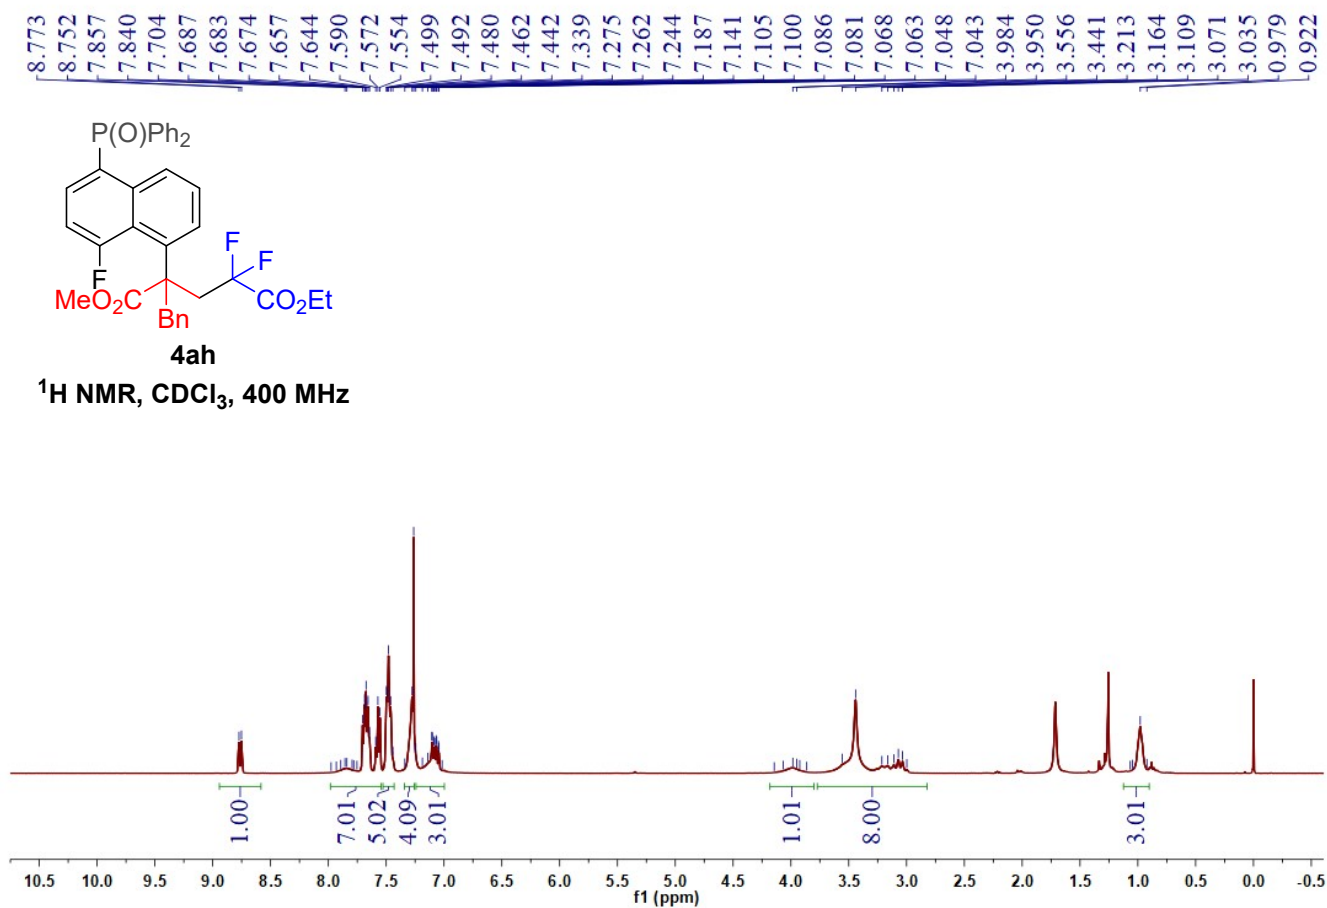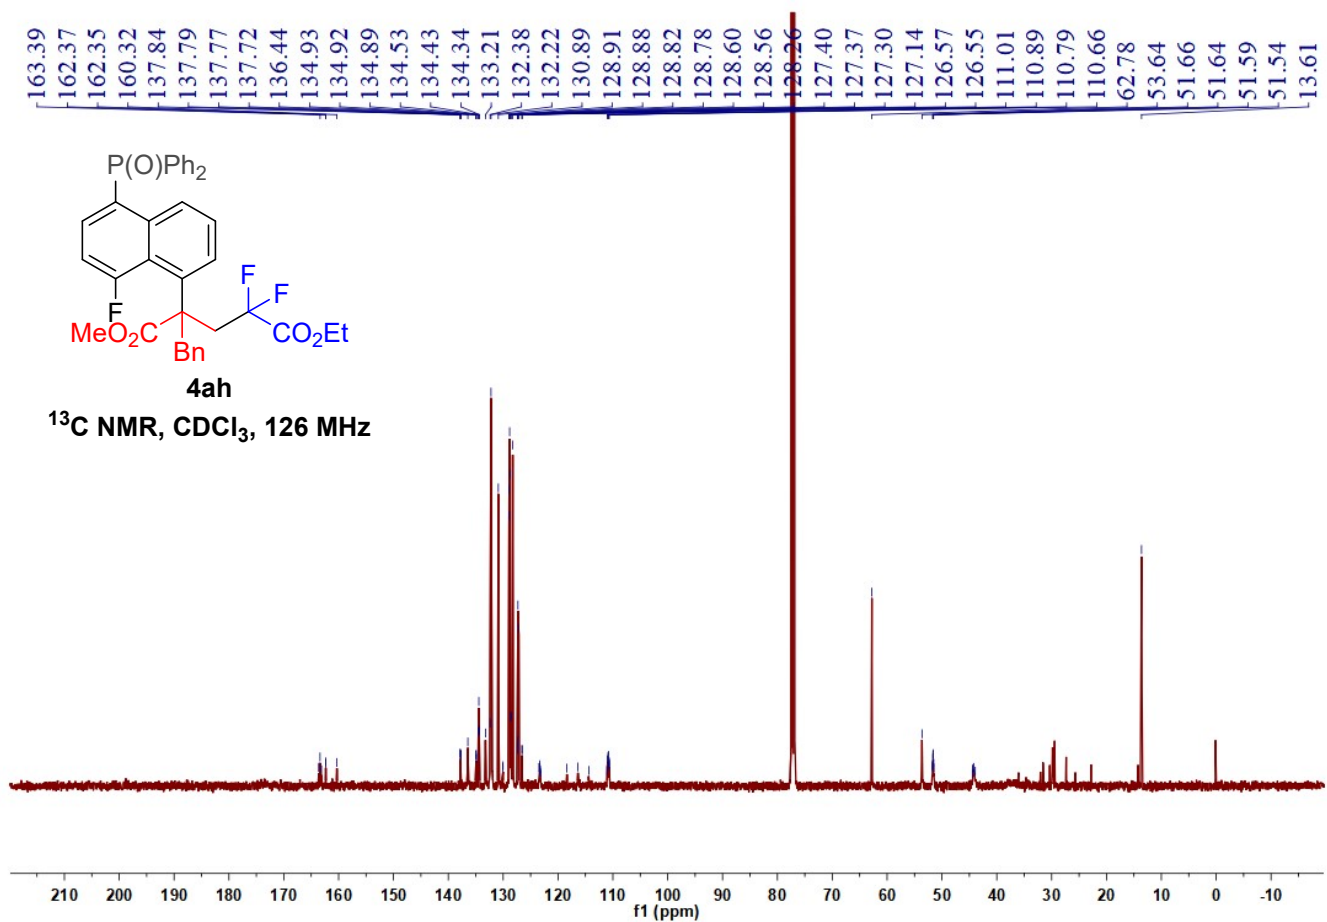

-32.40

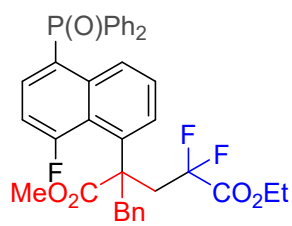

4ah

$^{31}\text{P}$  NMR,  $\text{CDCl}_3$ , 162 MHz

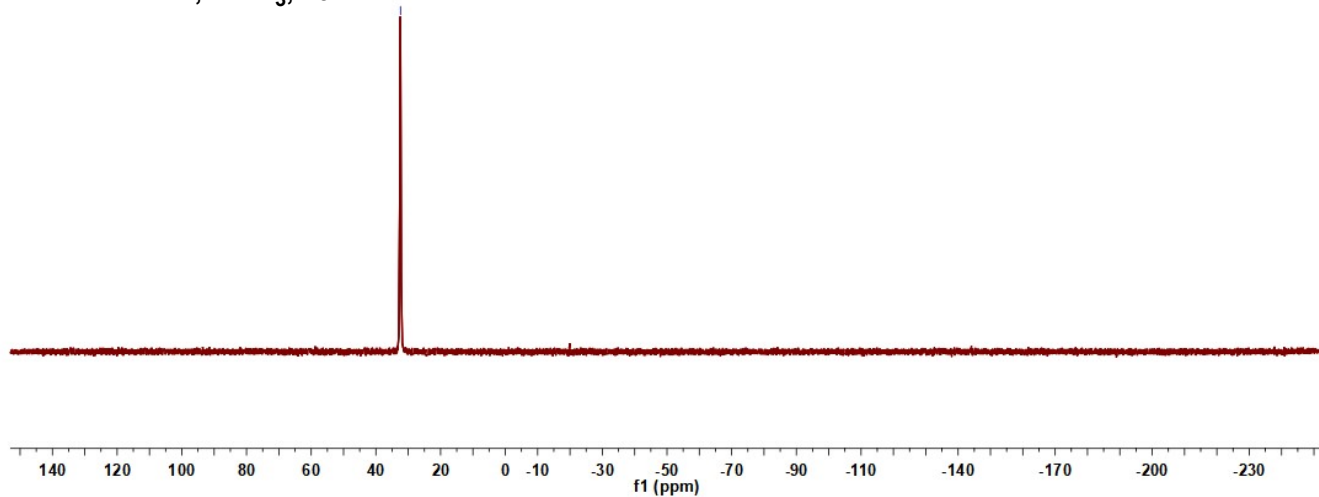

-97.76  
-99.17  
-104.62

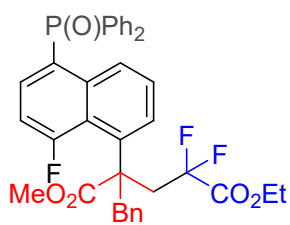

4ah

$^{19}\text{F}$  NMR,  $\text{CDCl}_3$ , 377 MHz

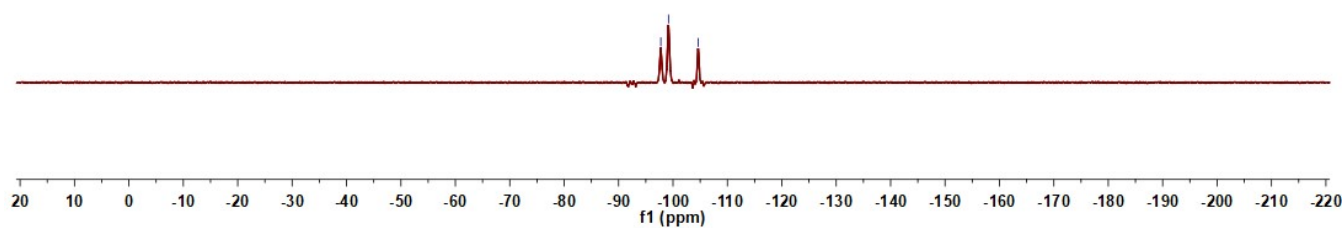

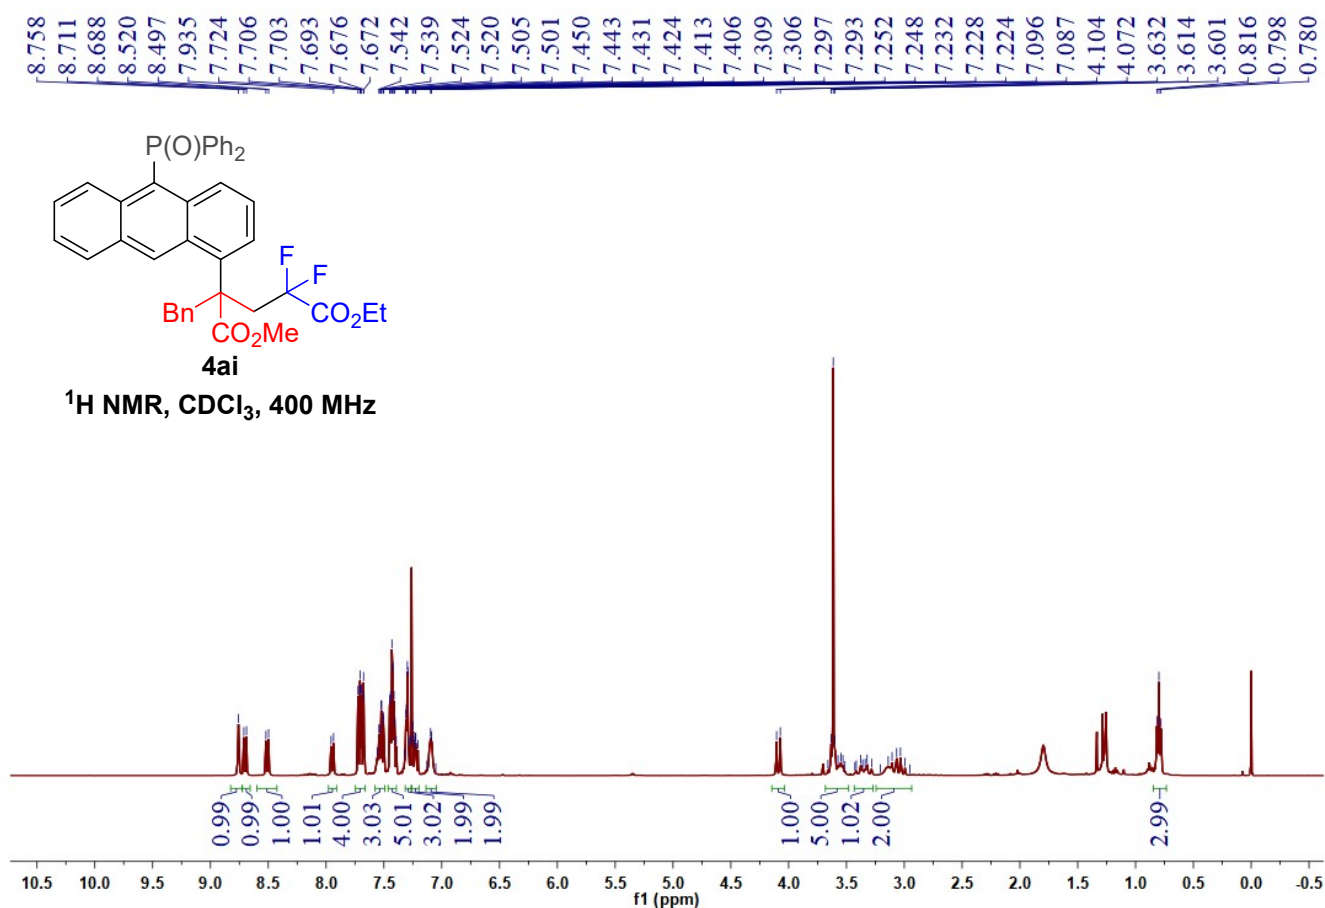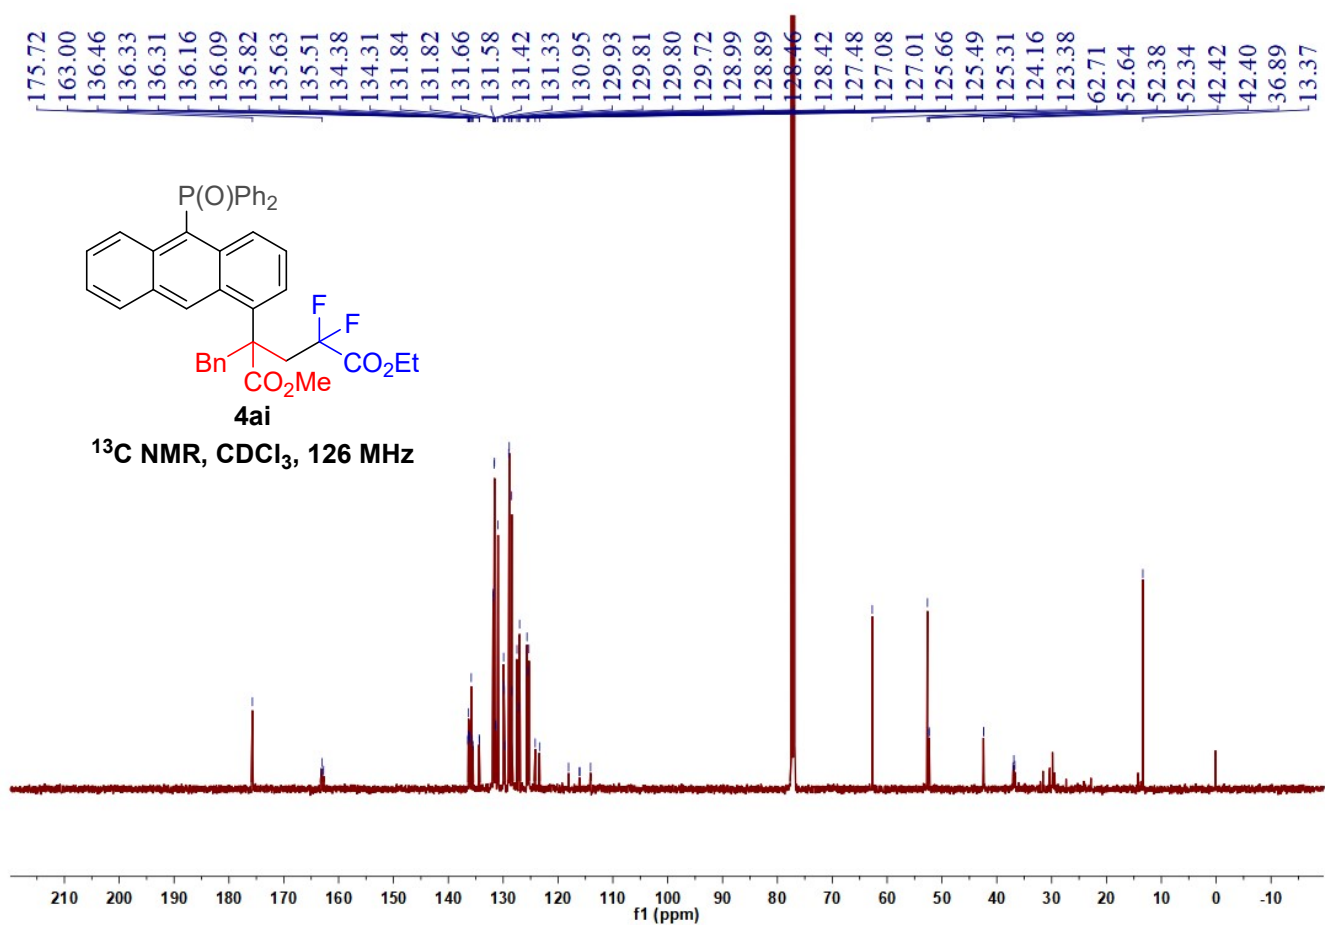

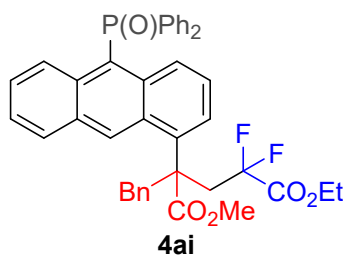

<sup>31</sup>P NMR, CDCl<sub>3</sub>, 162 MHz

-31.52

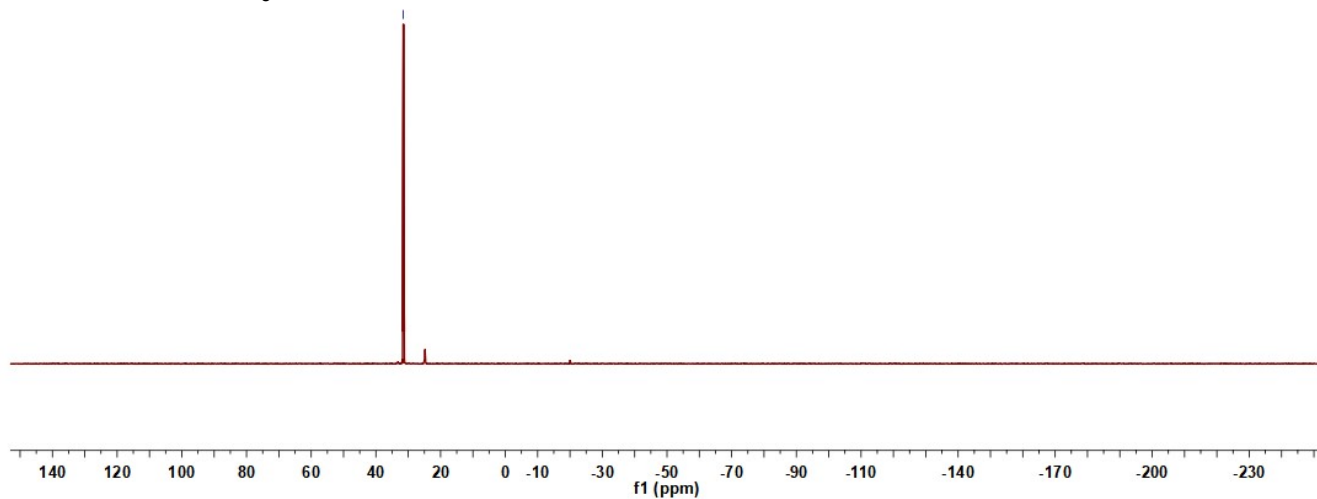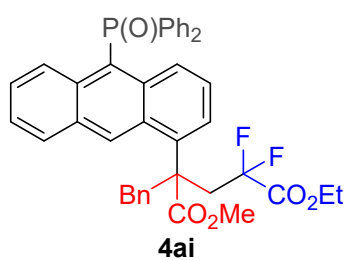

<sup>19</sup>F NMR, CDCl<sub>3</sub>, 377 MHz

-105.56  
-106.27

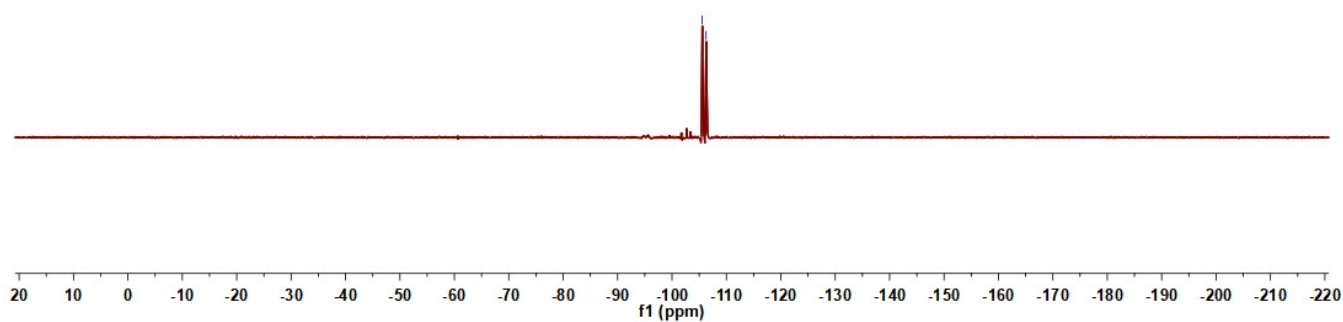

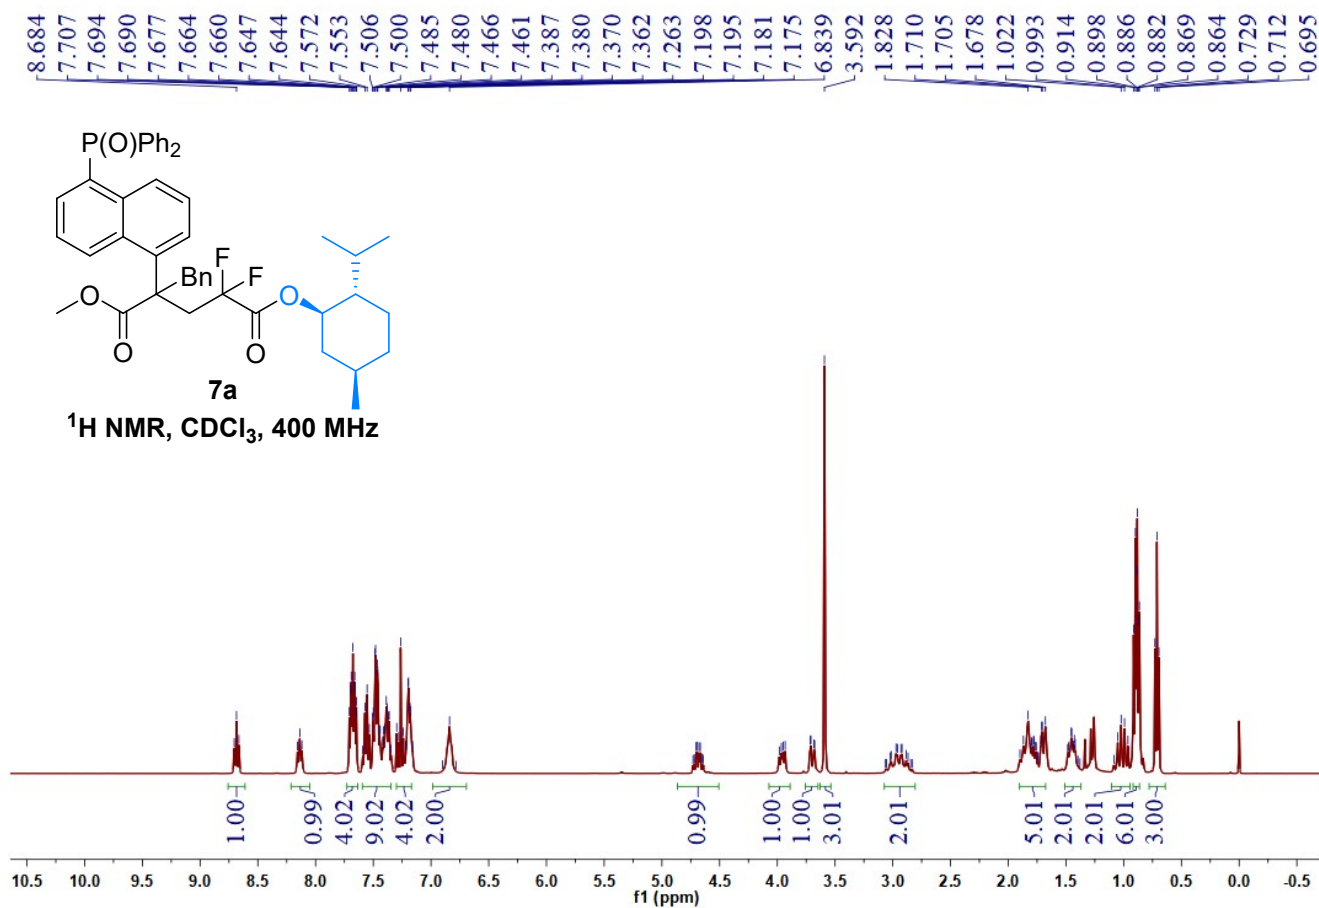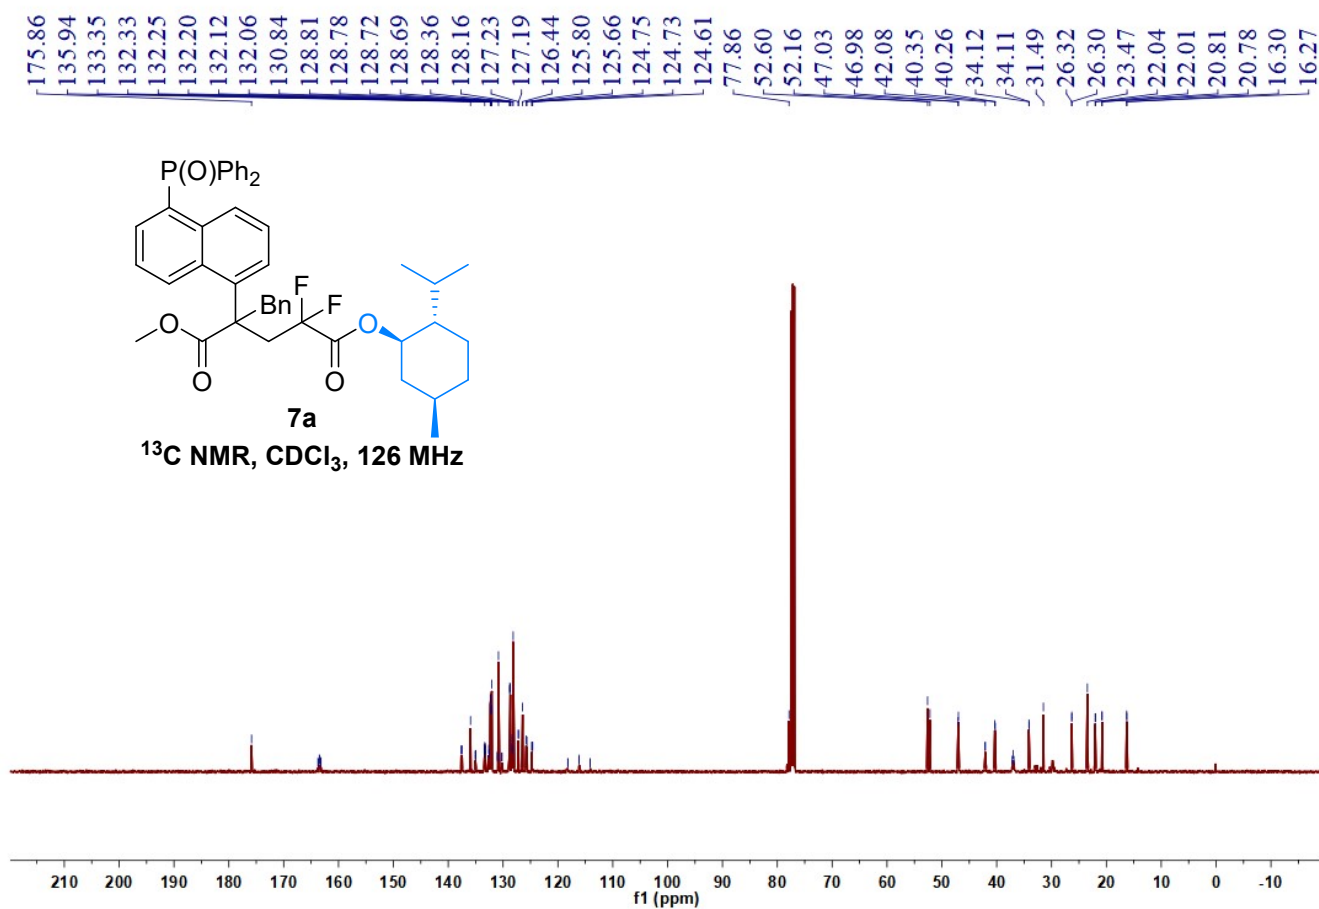

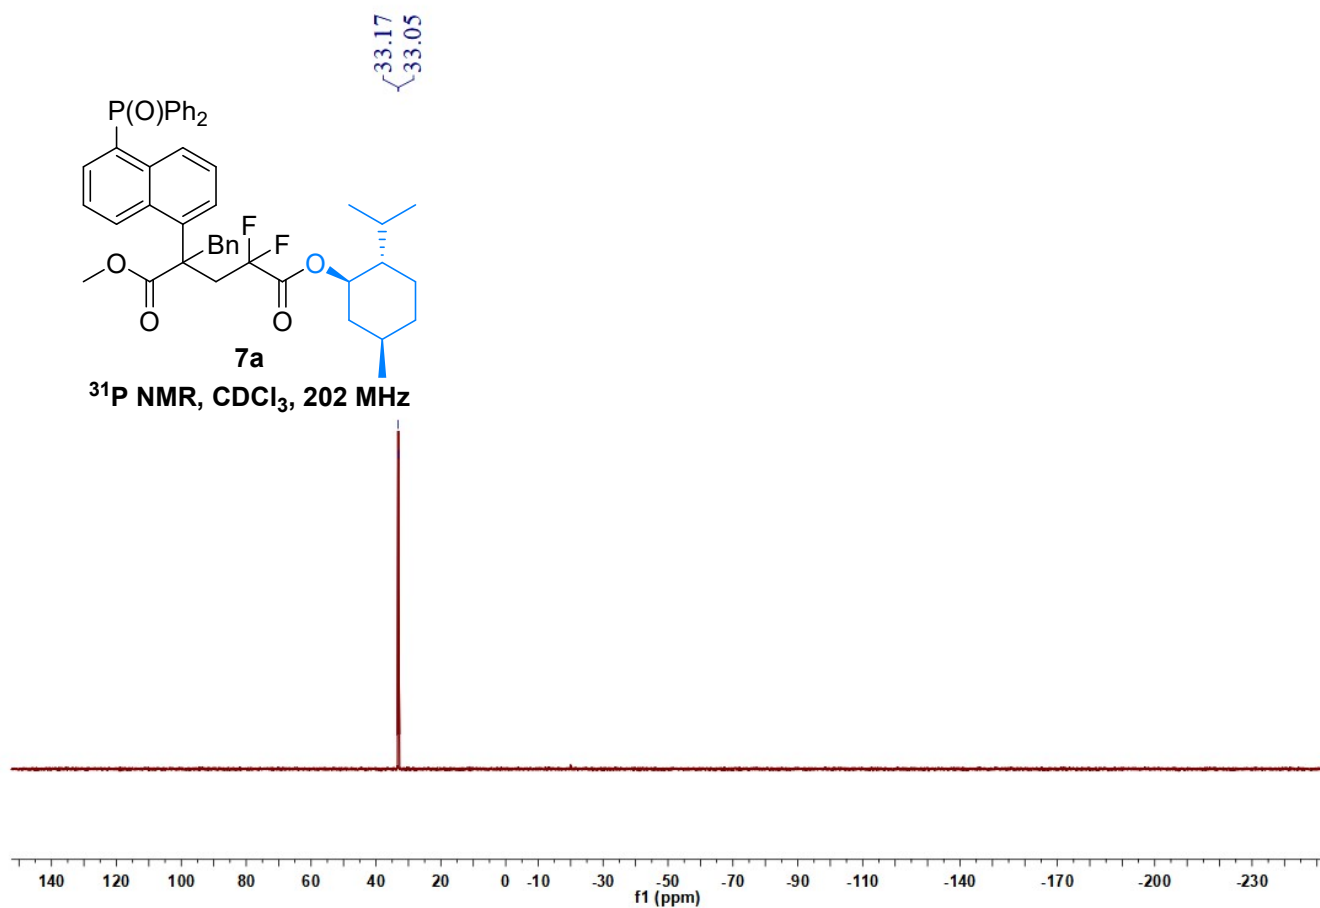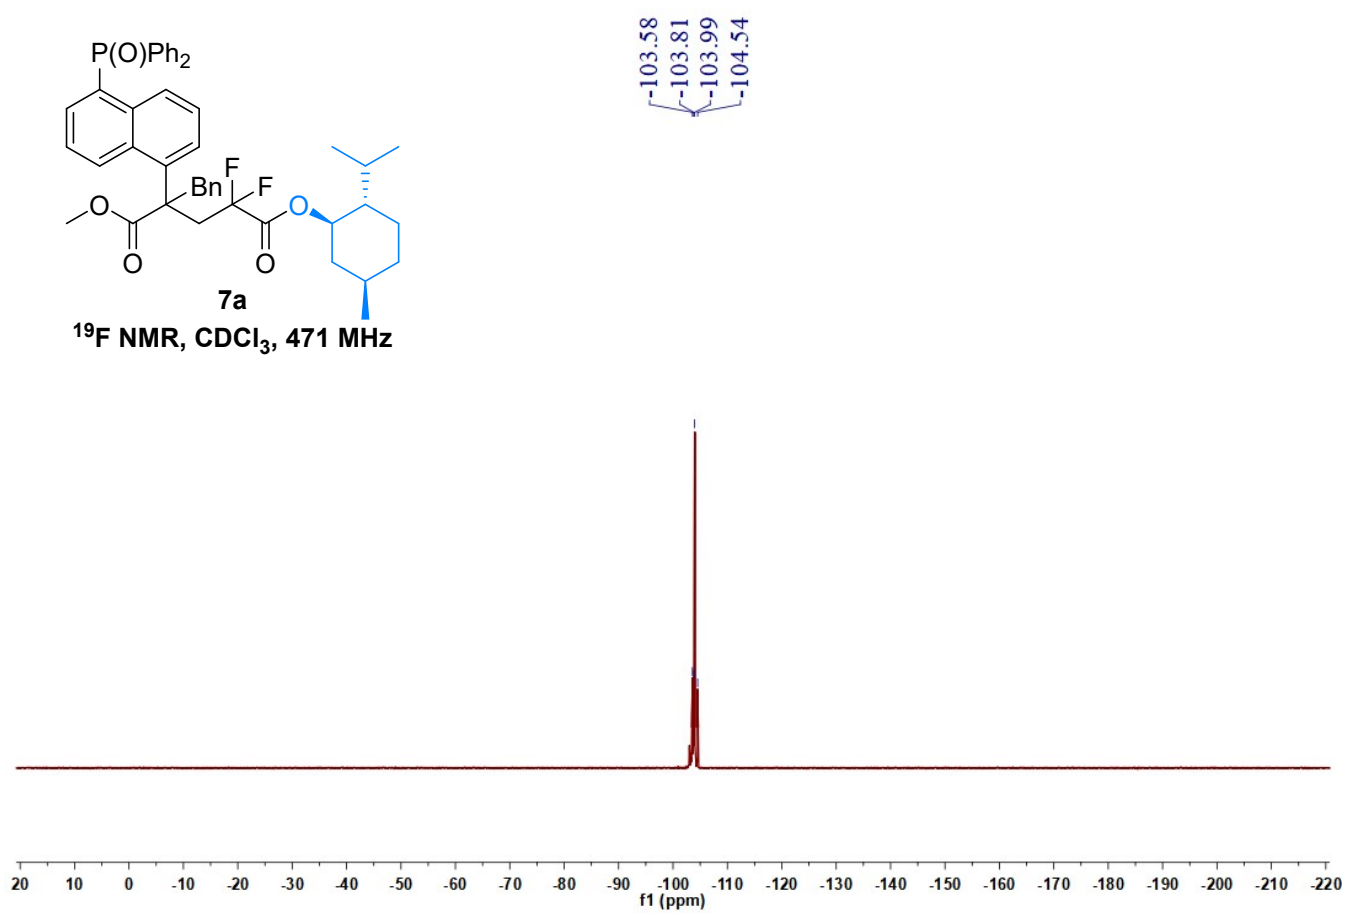



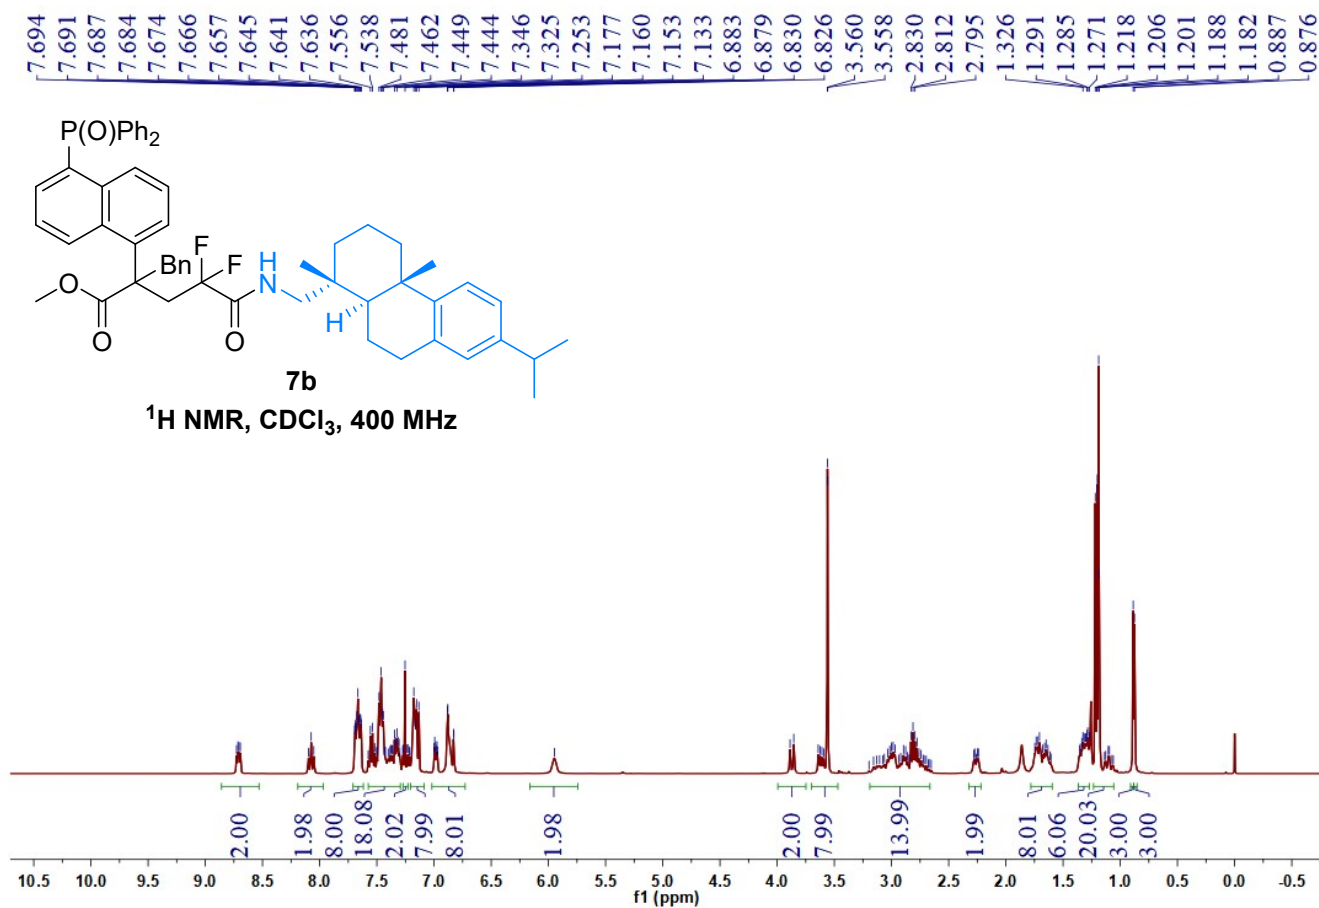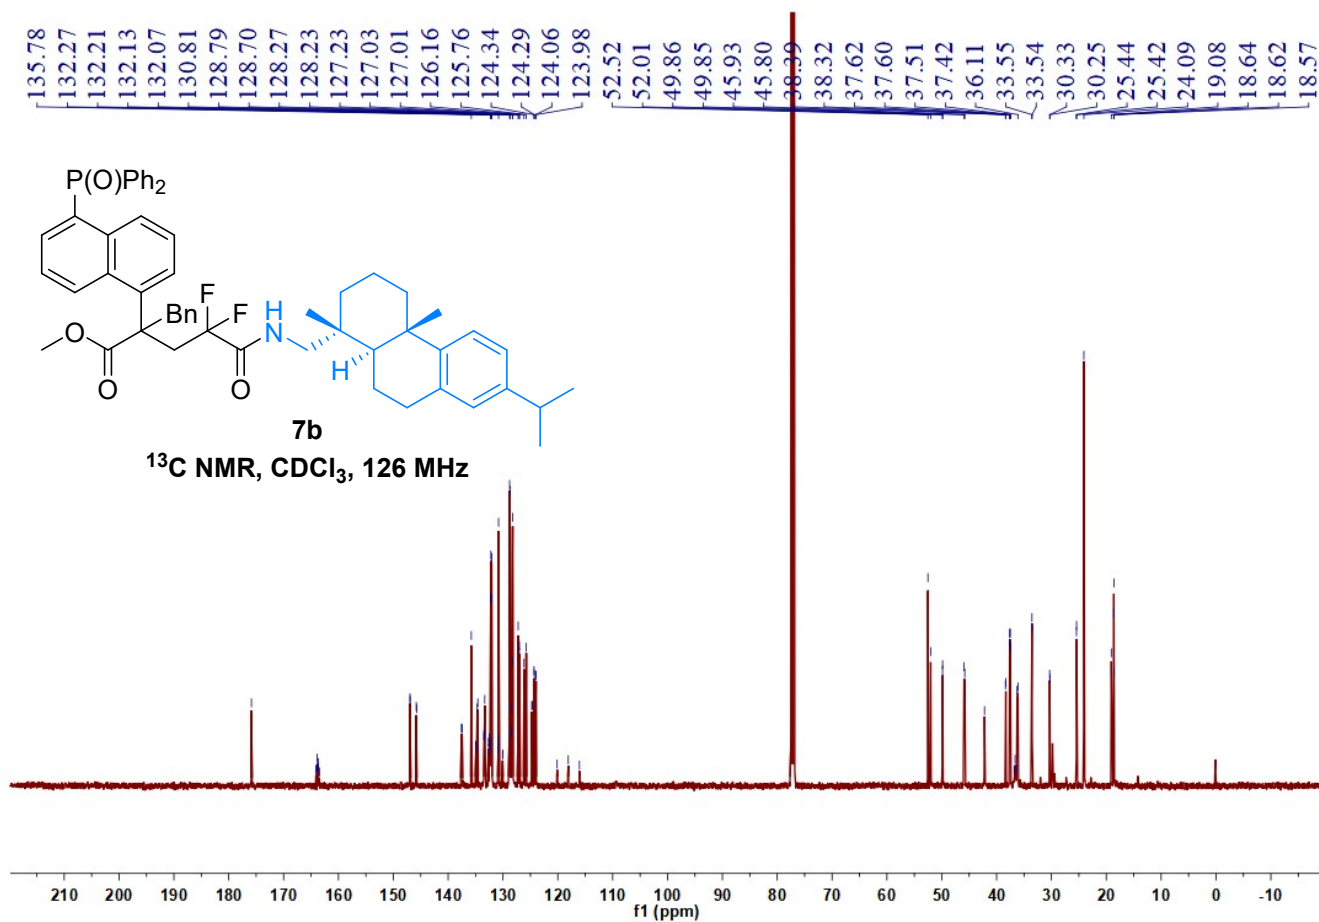

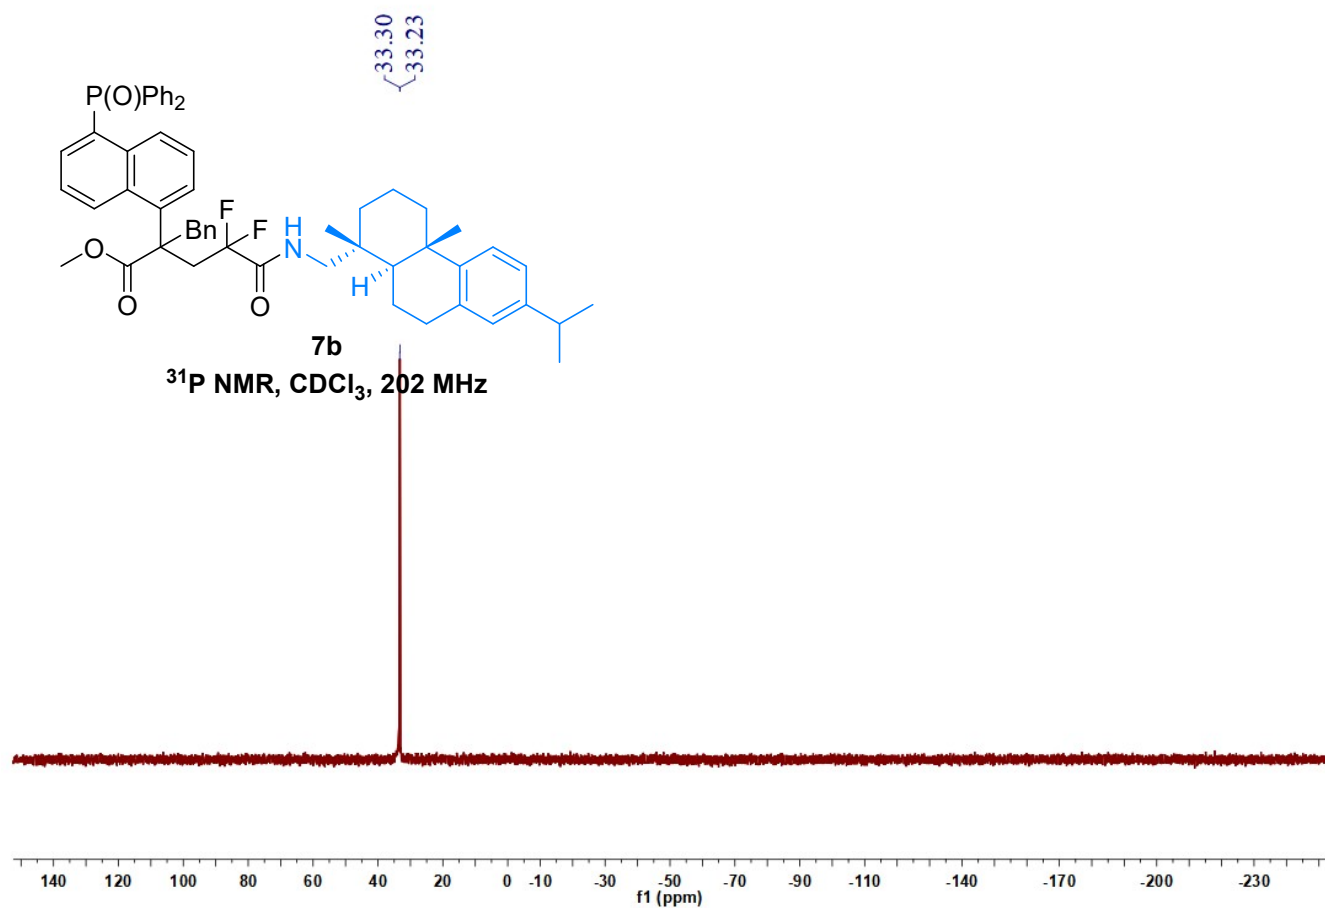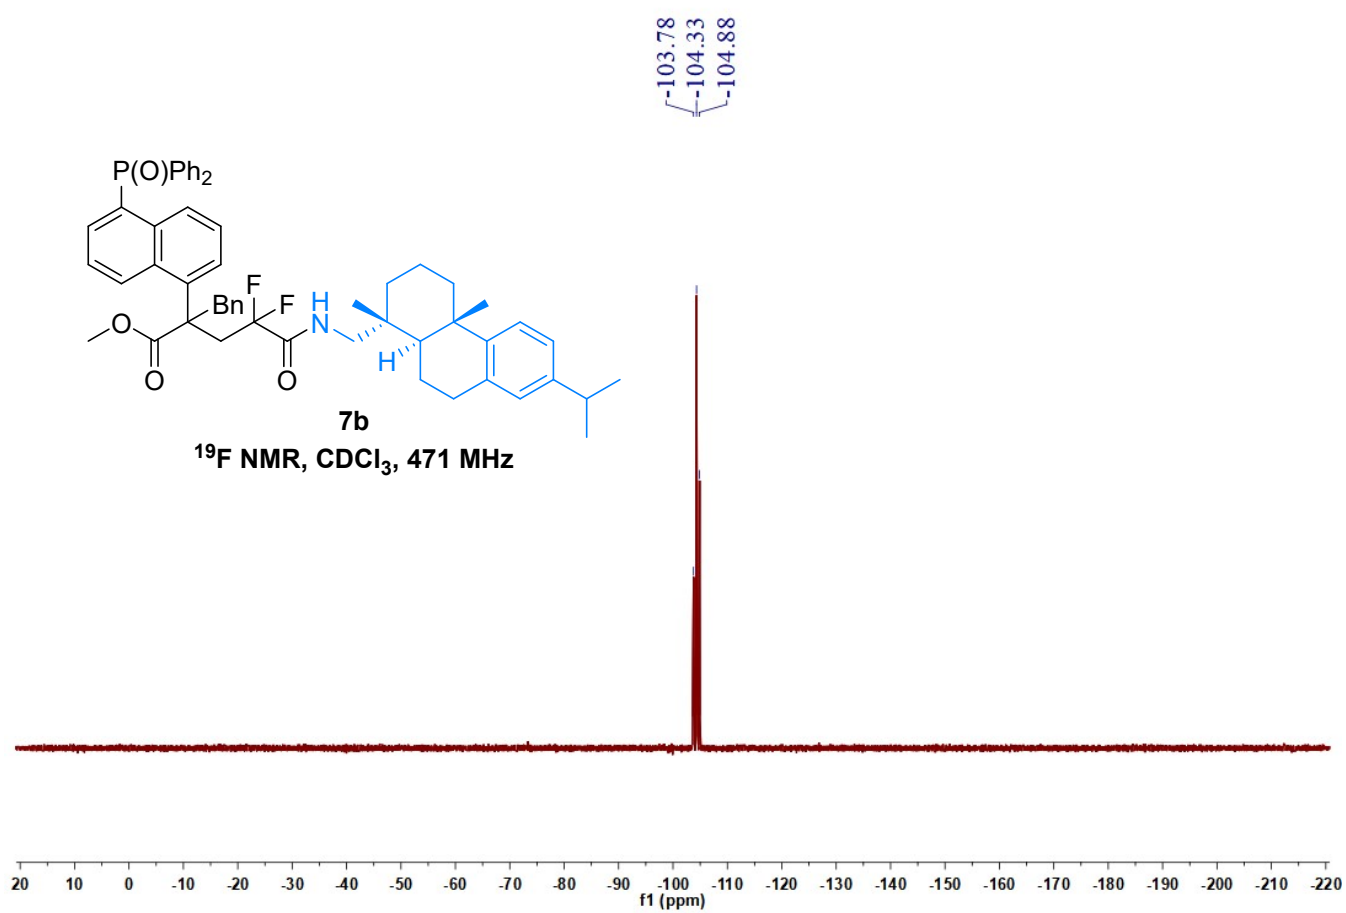

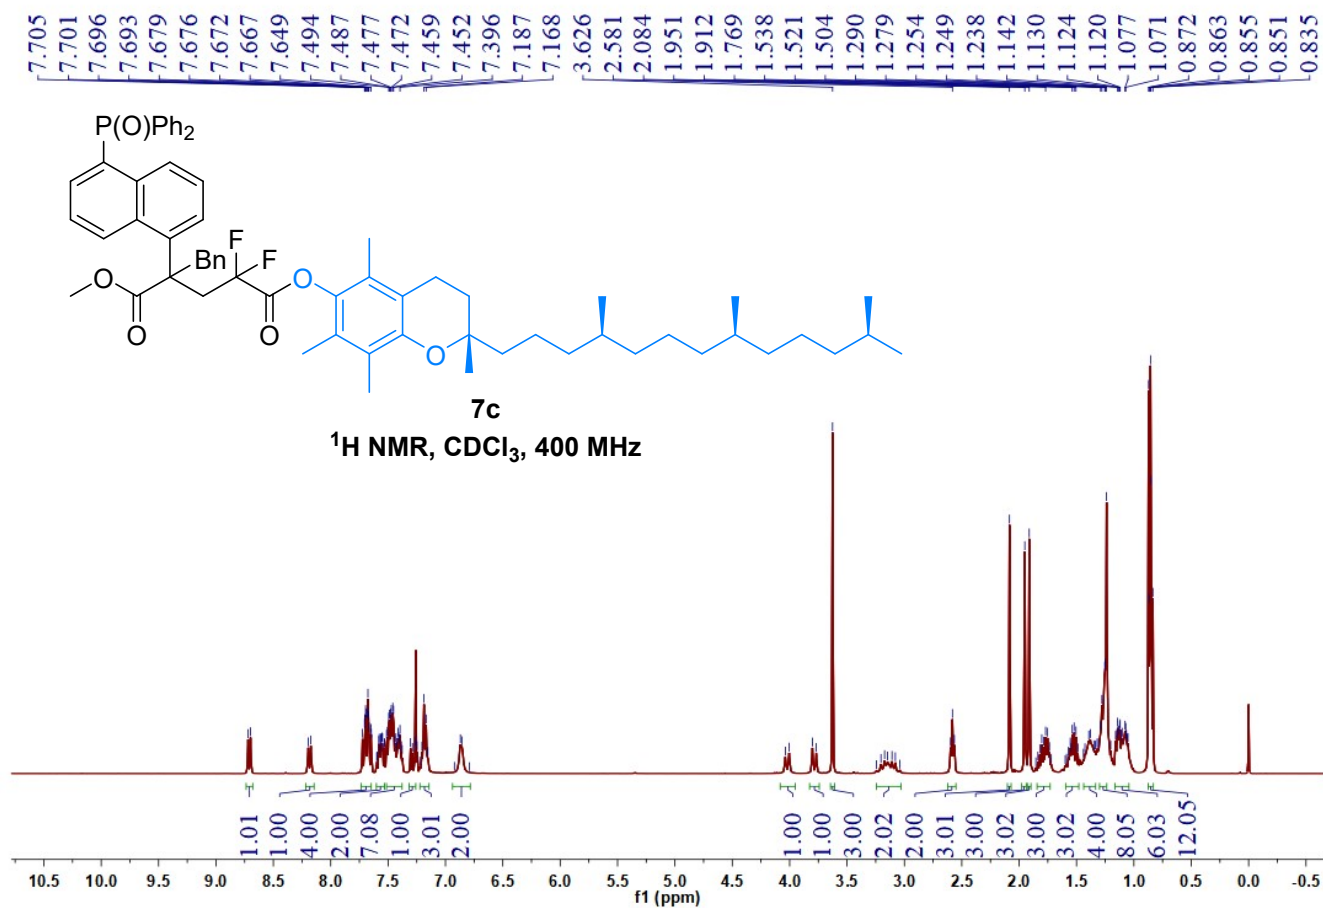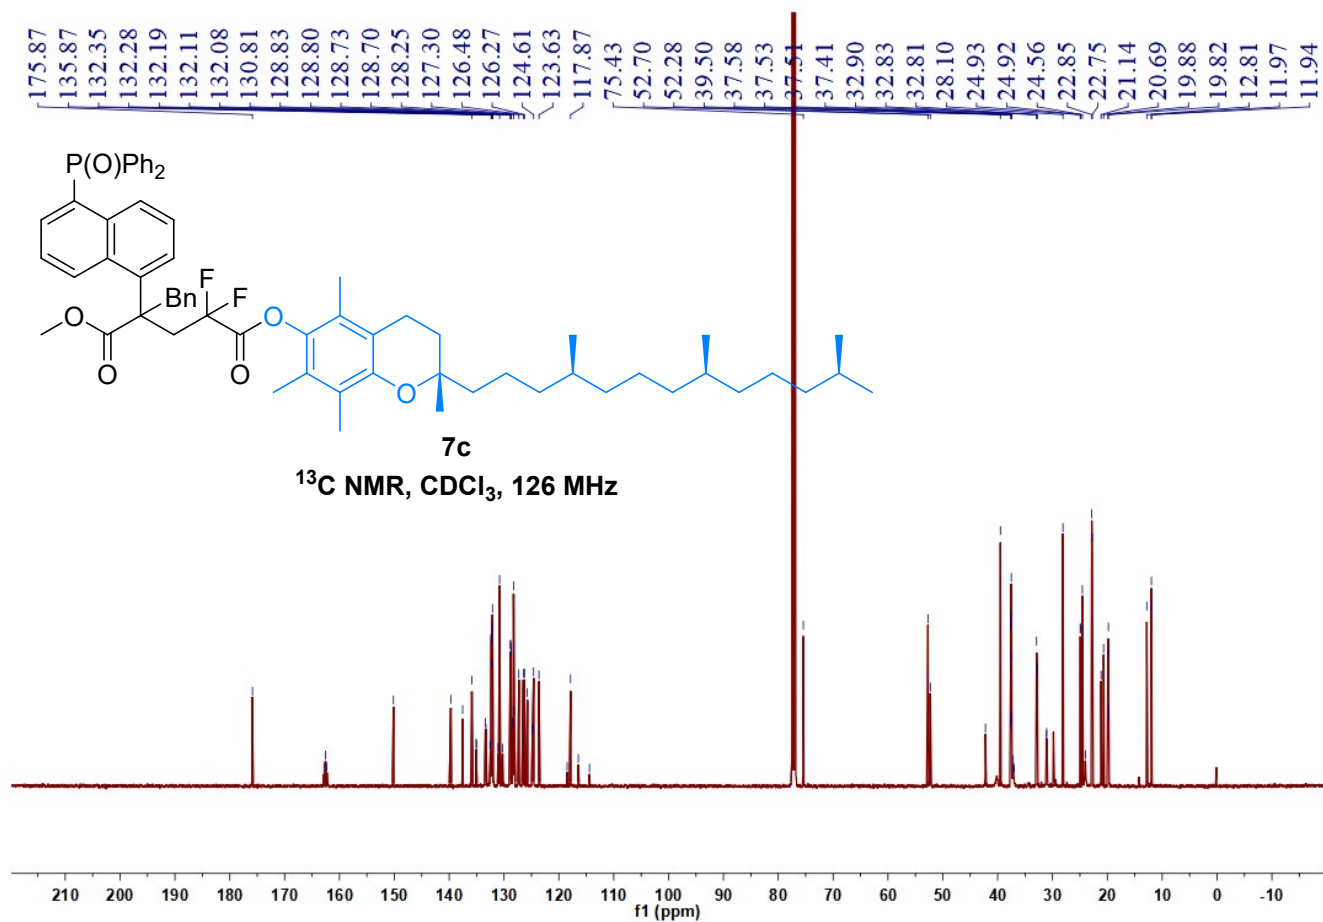

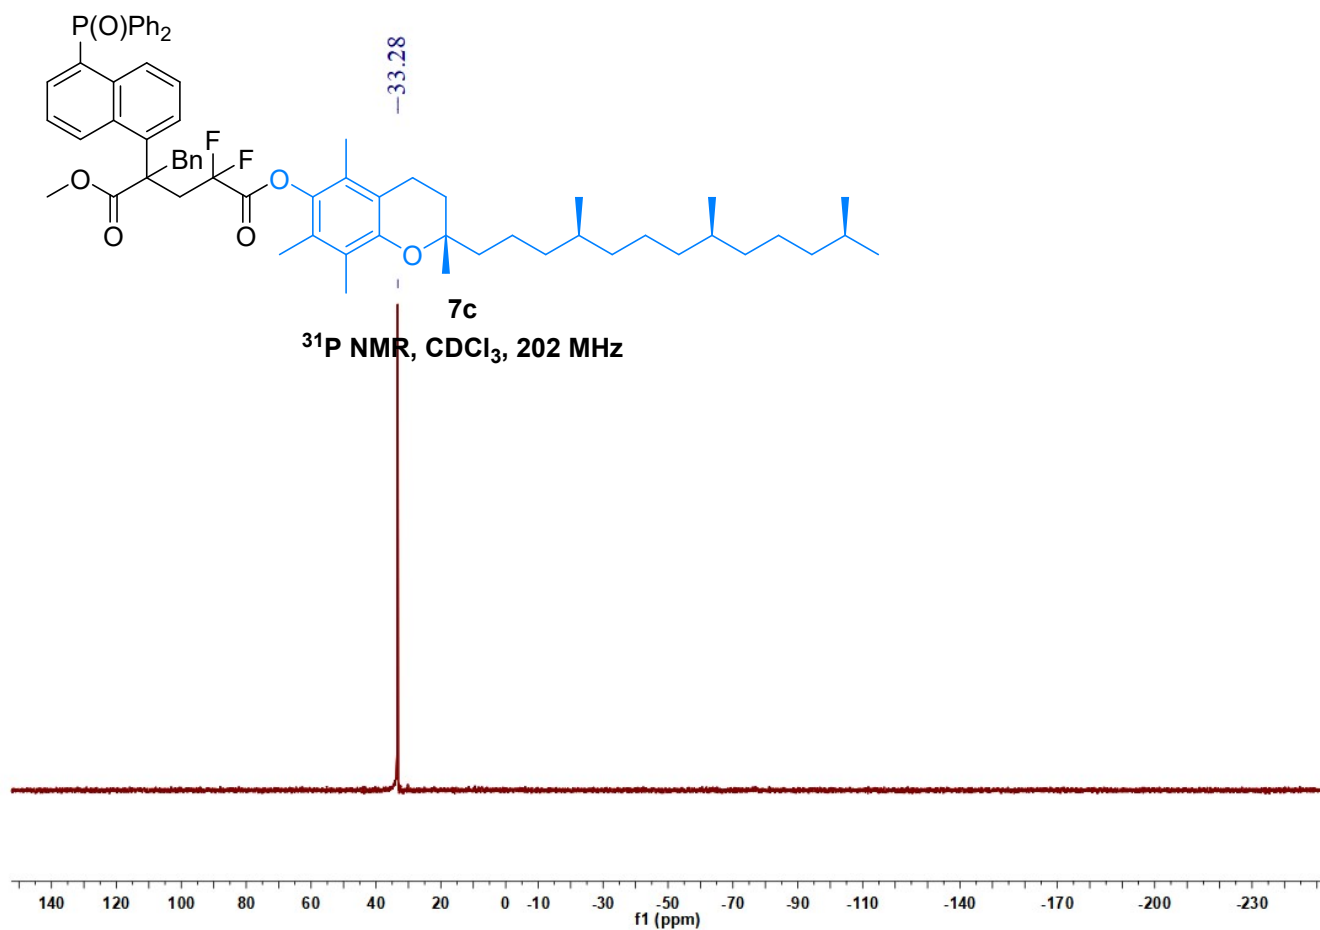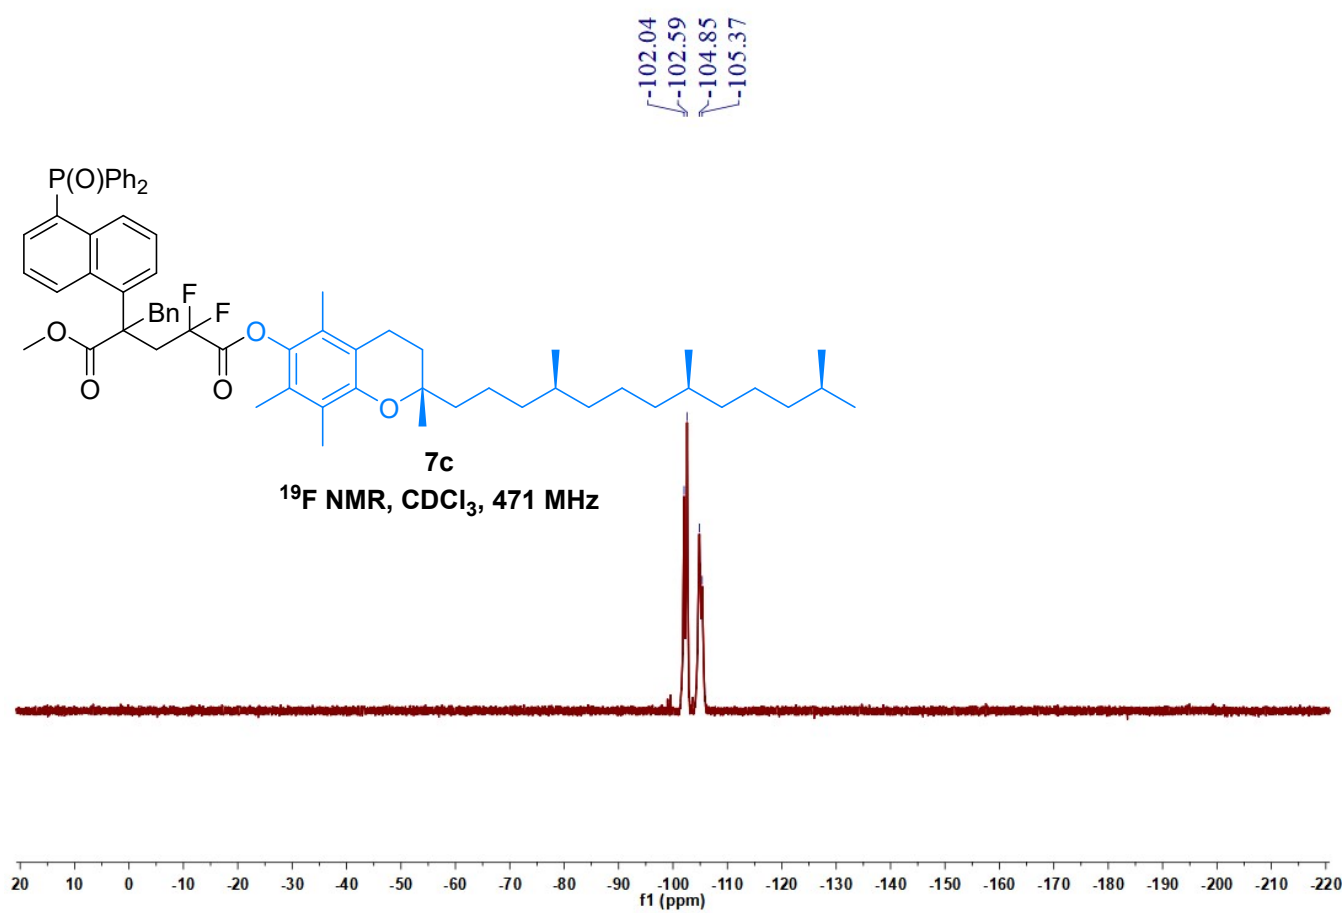

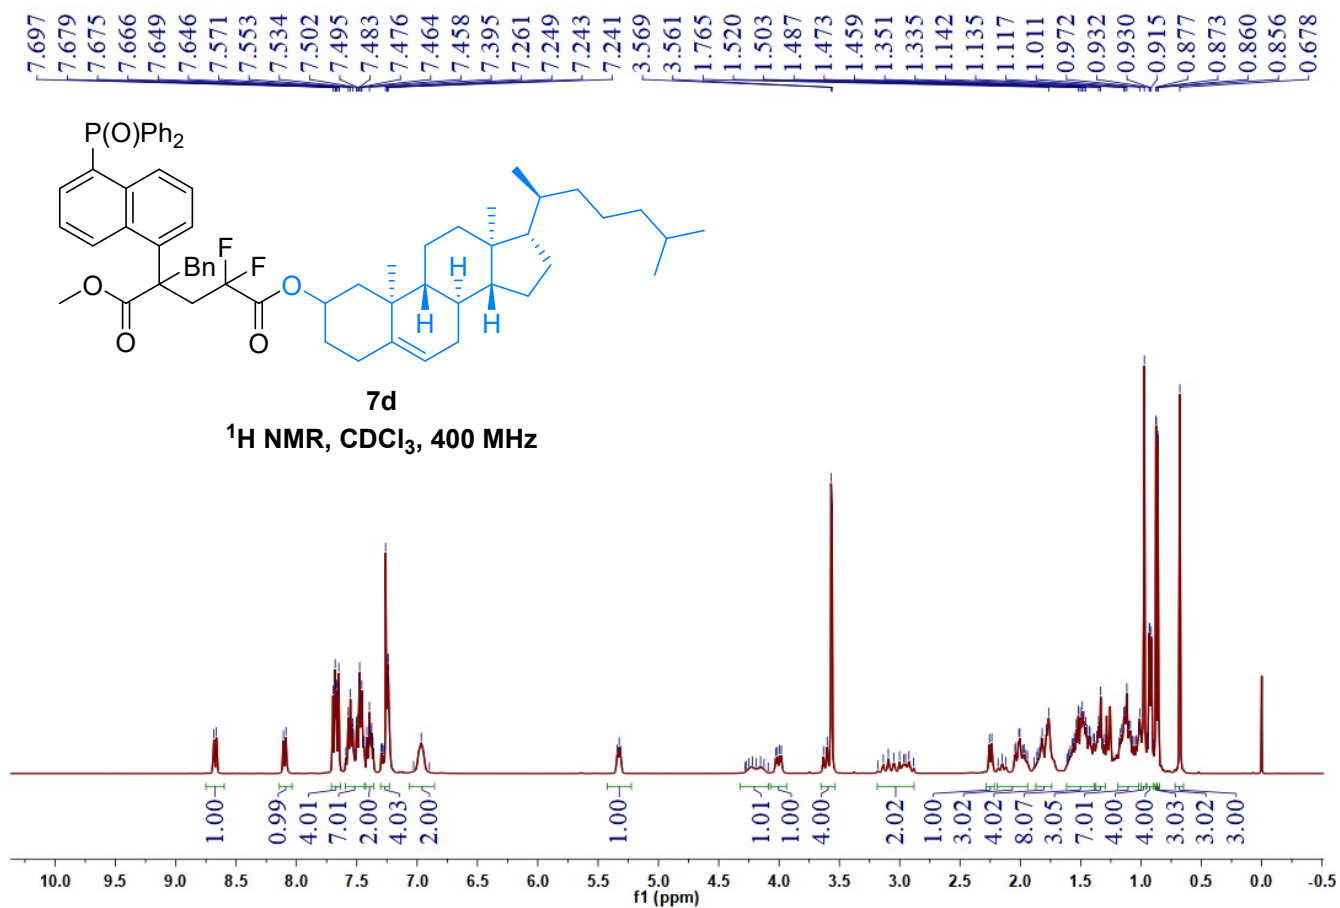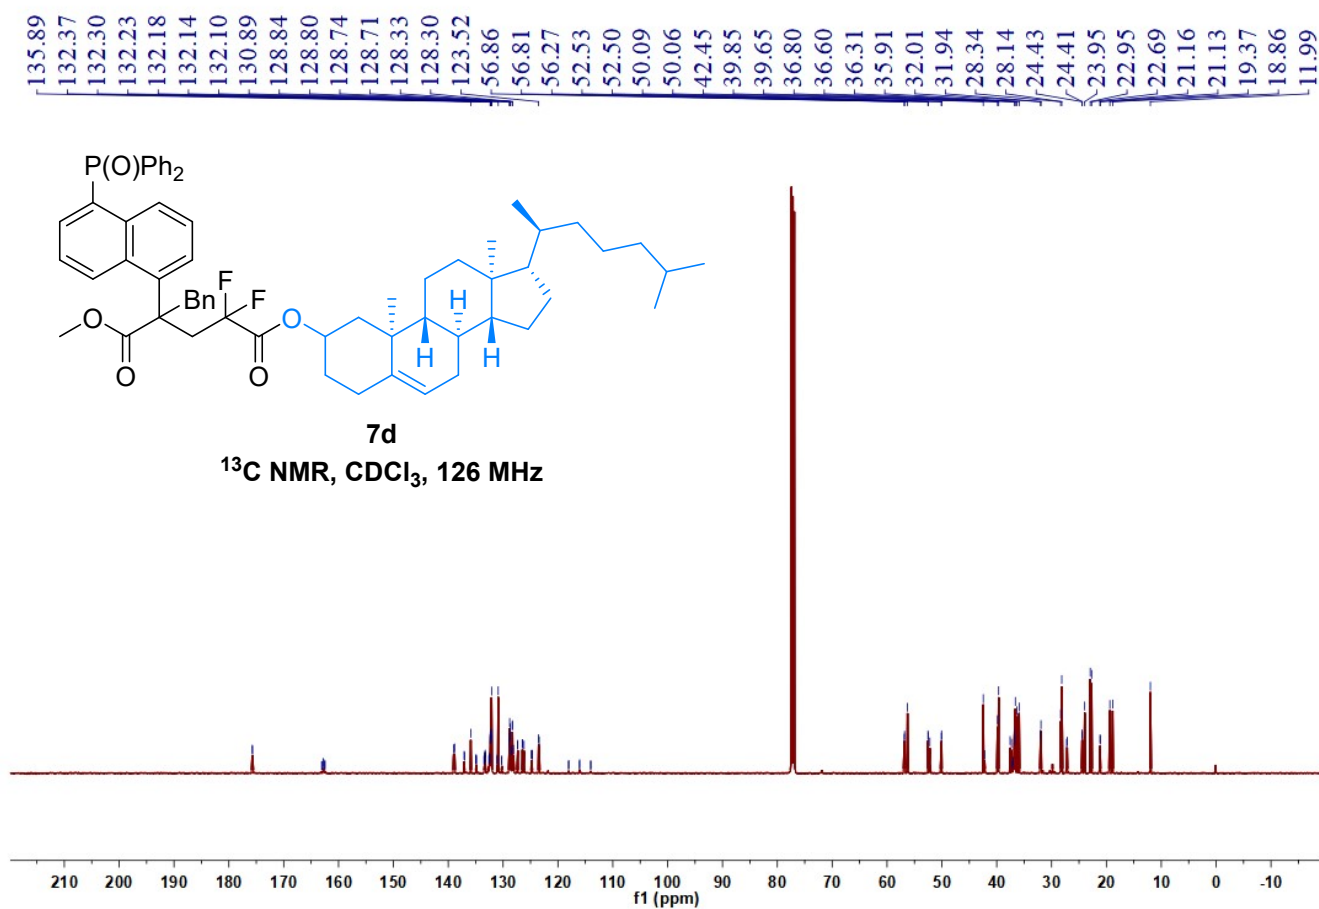

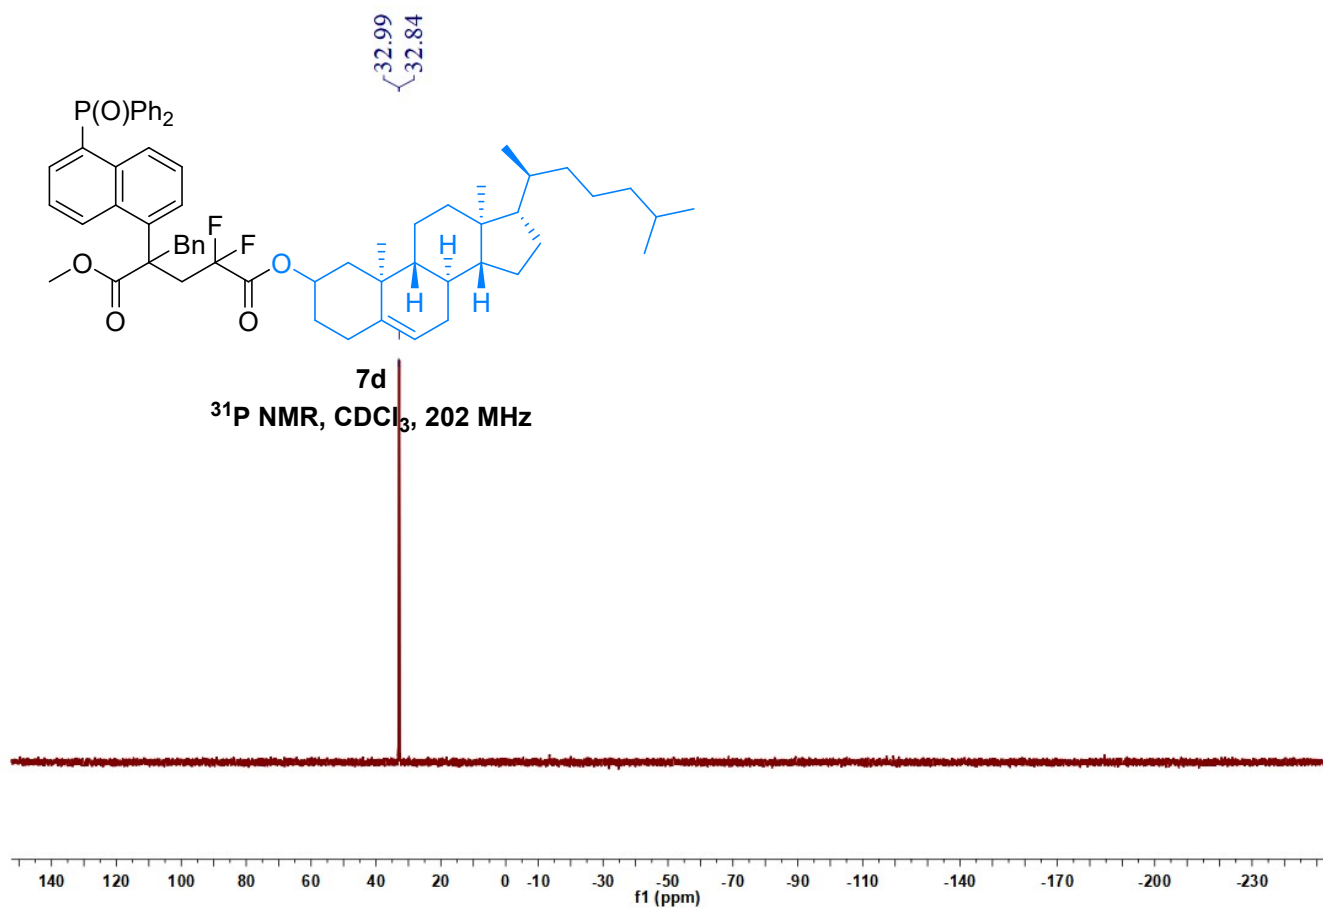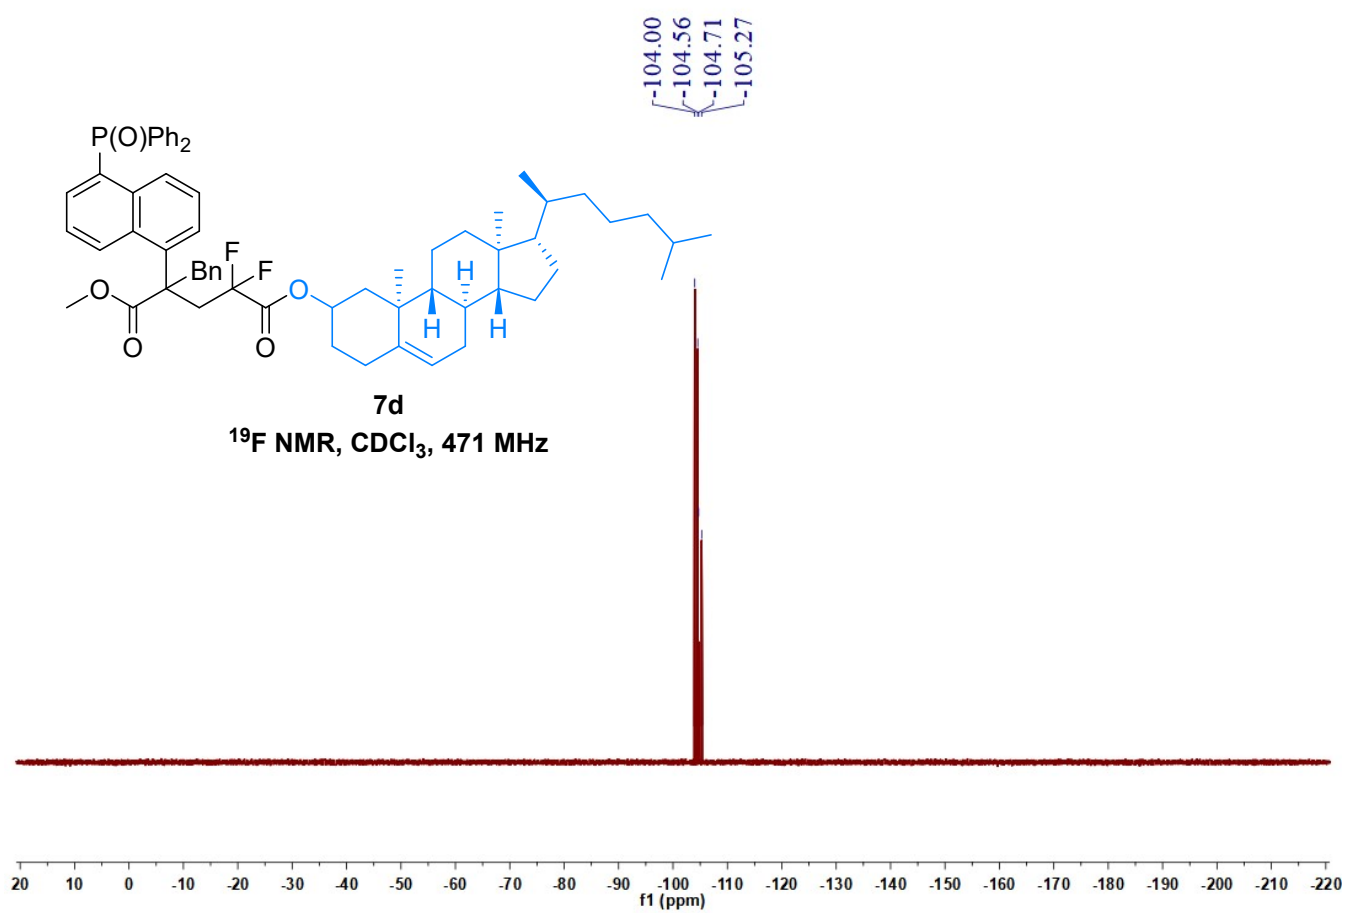



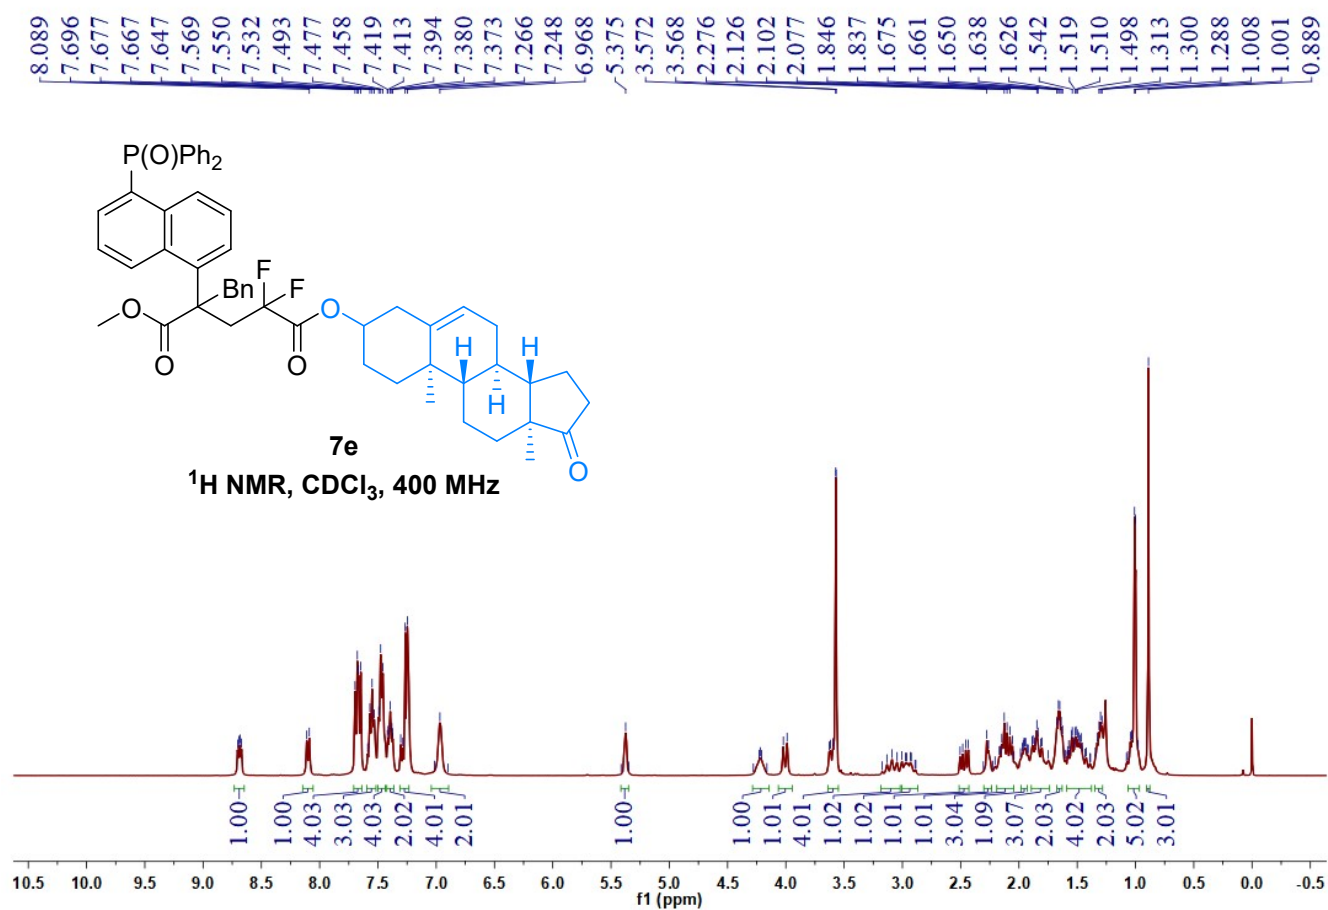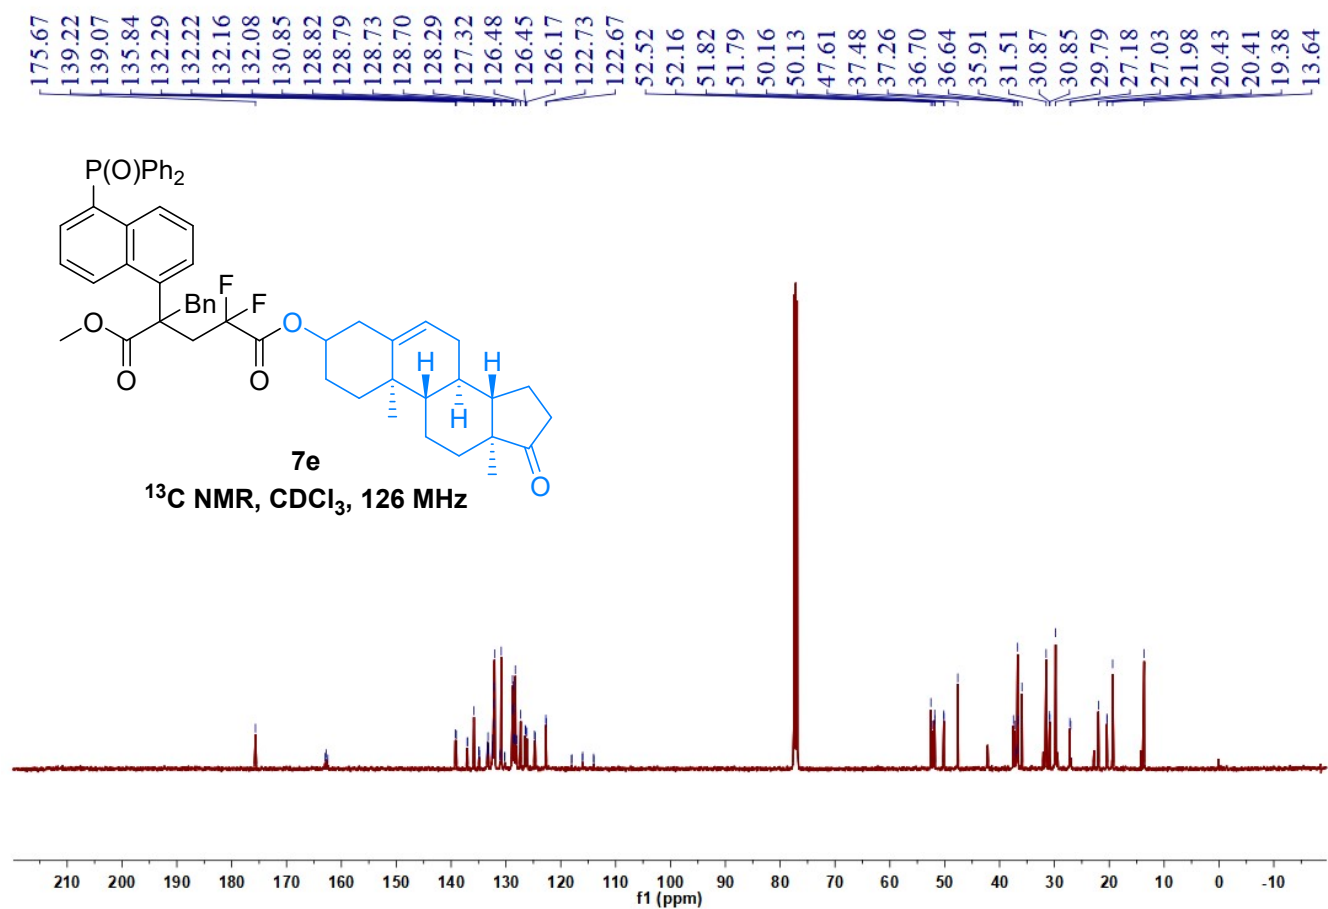



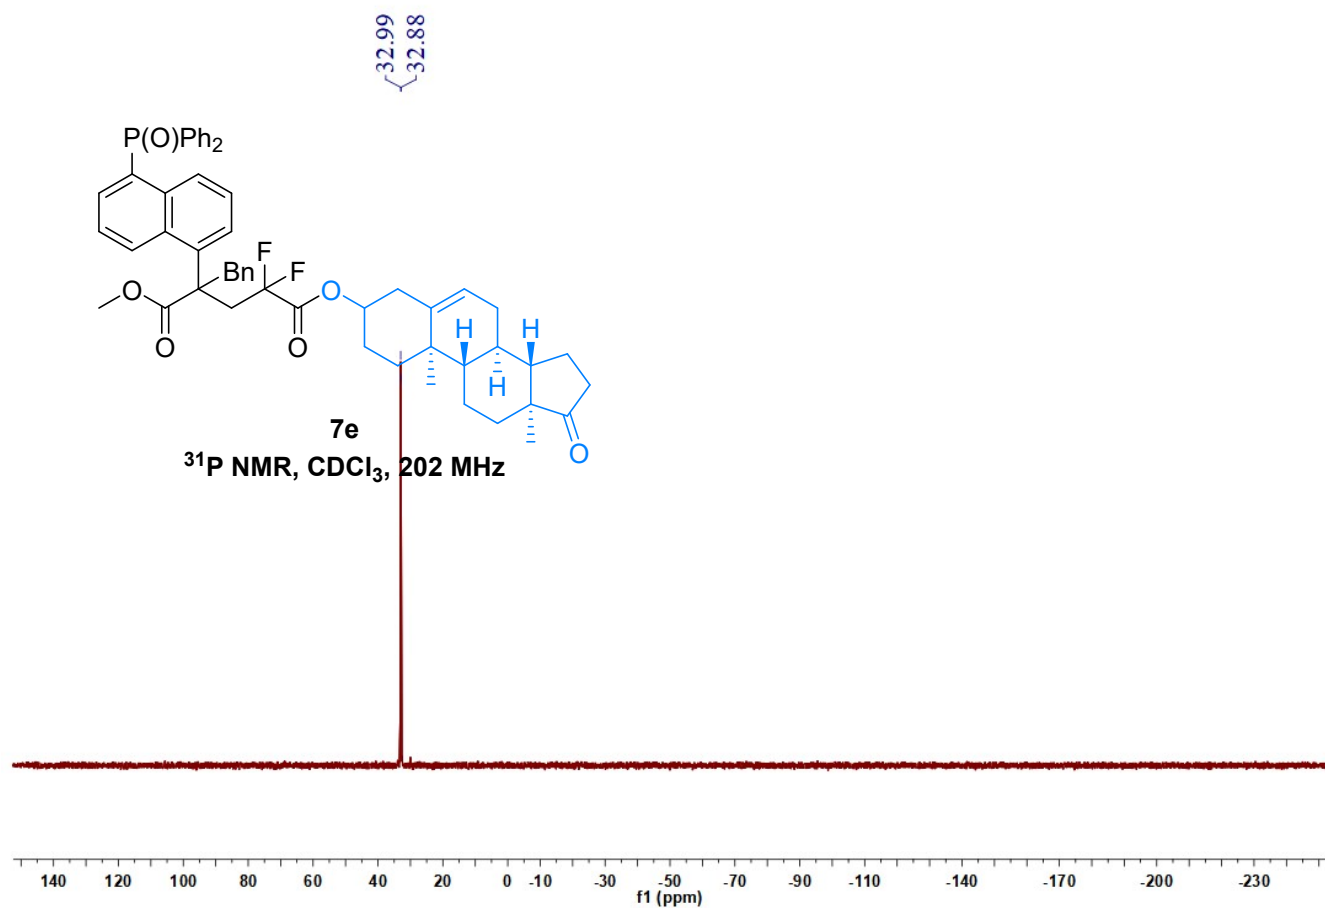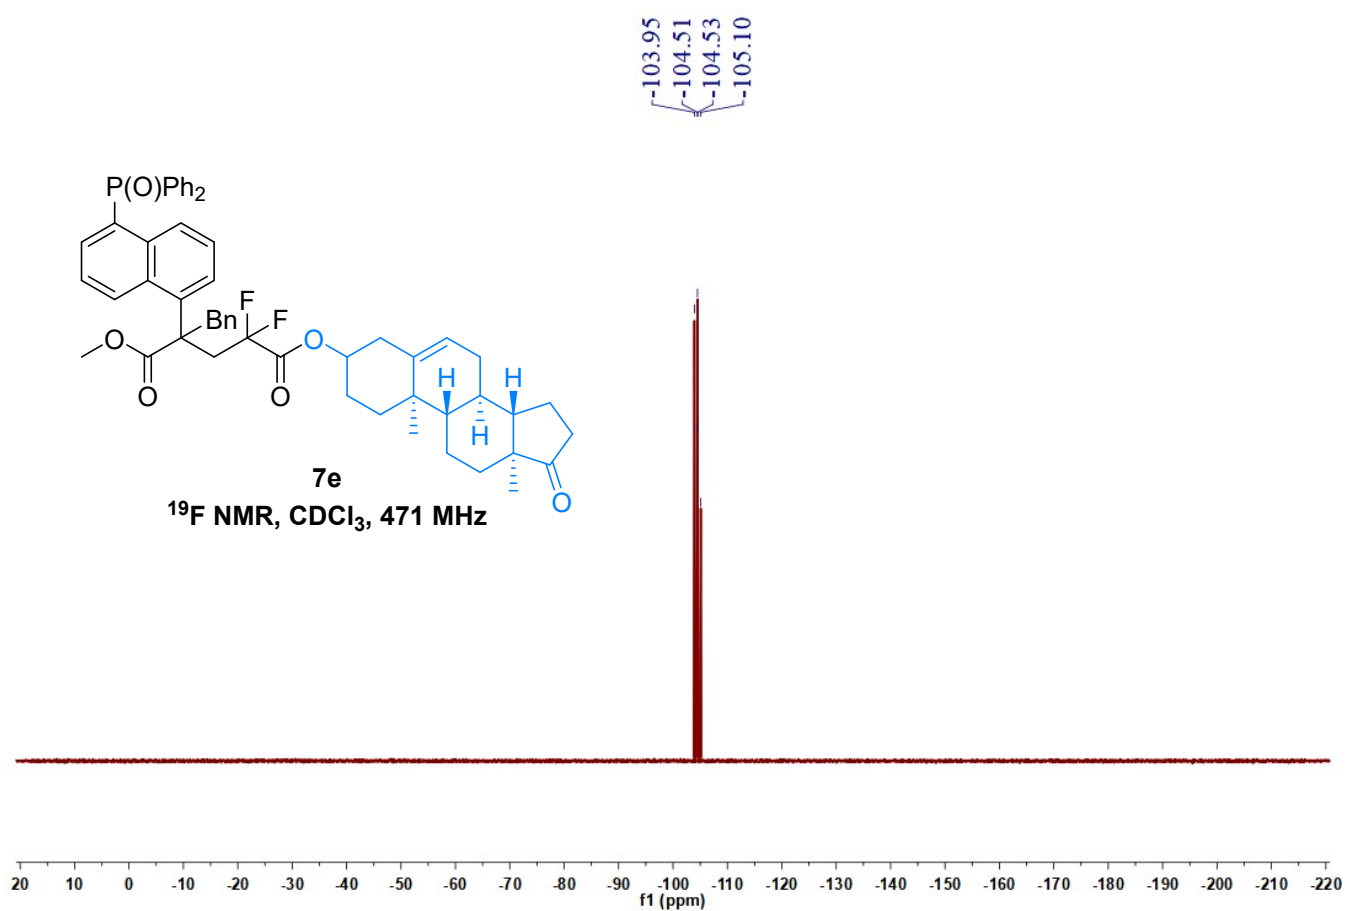

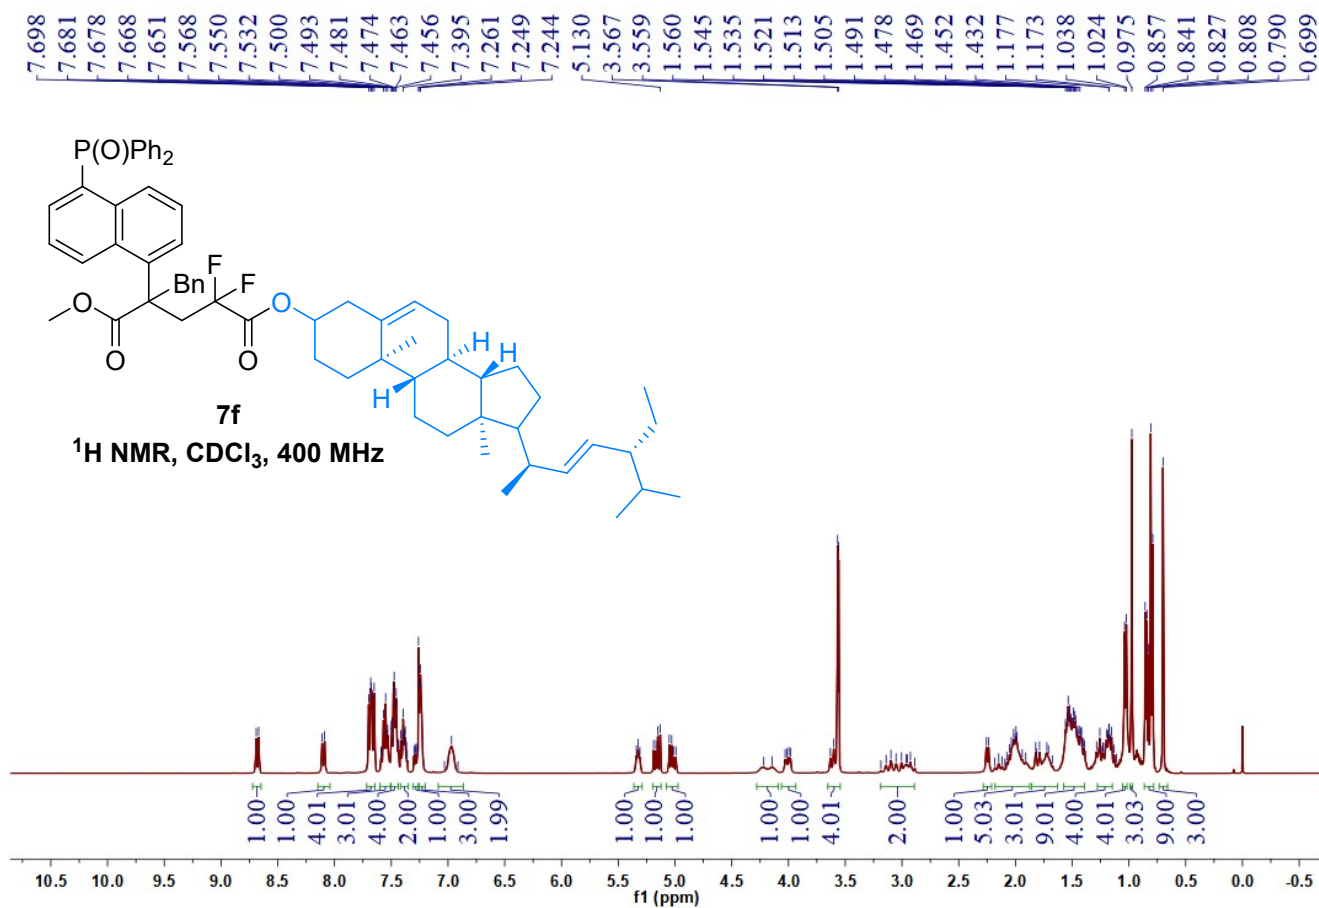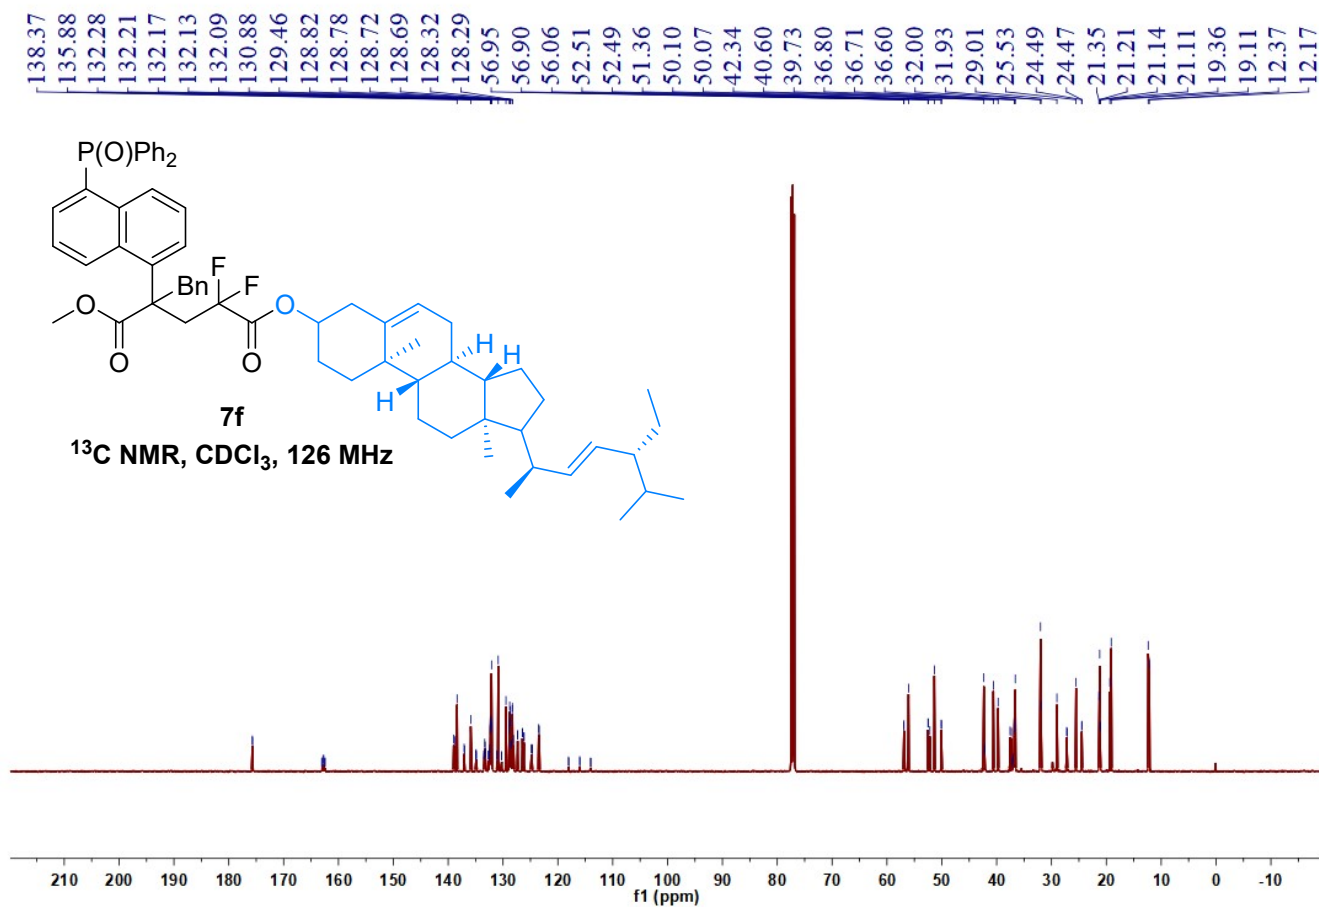

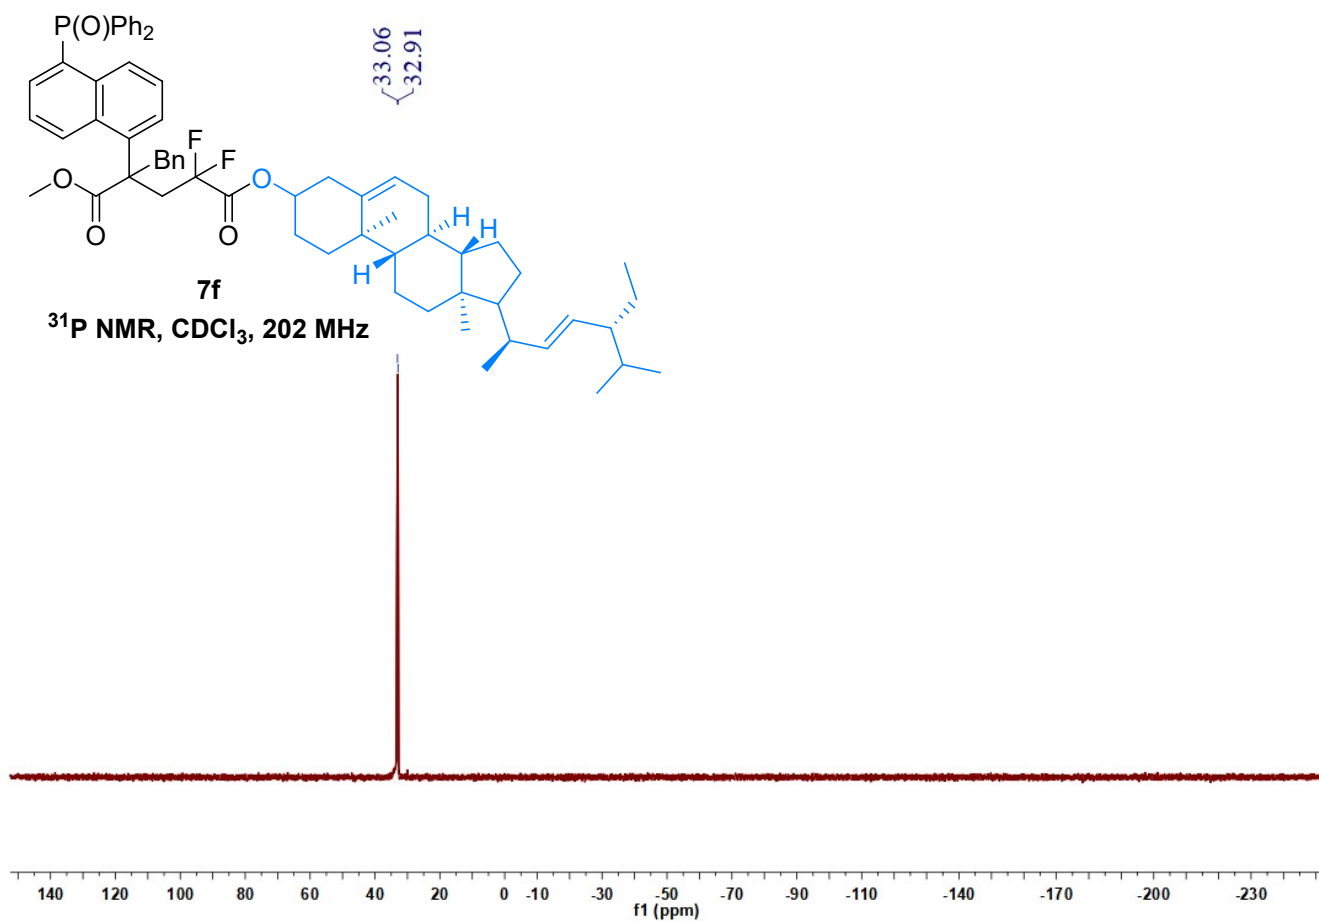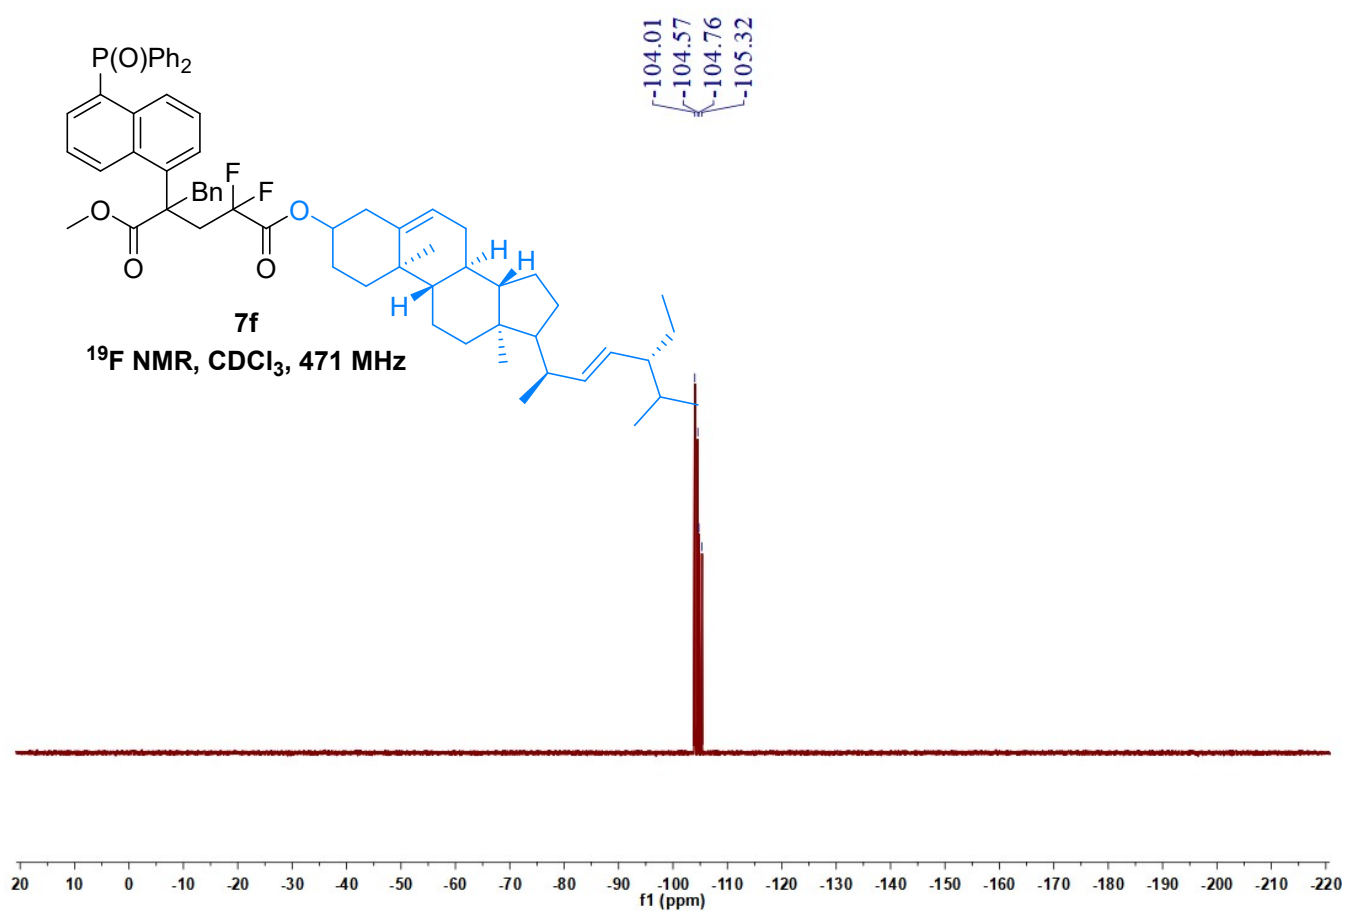

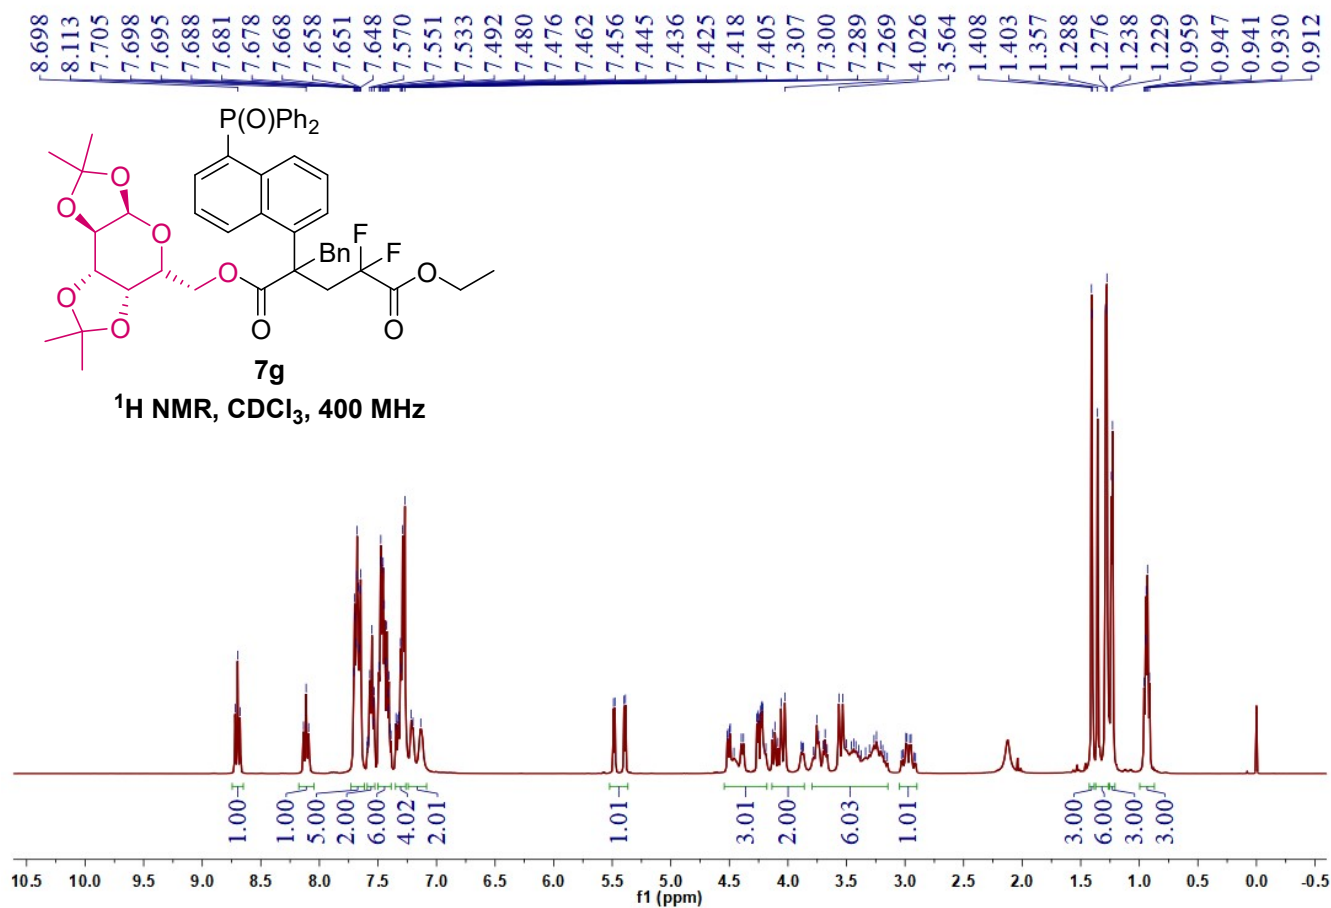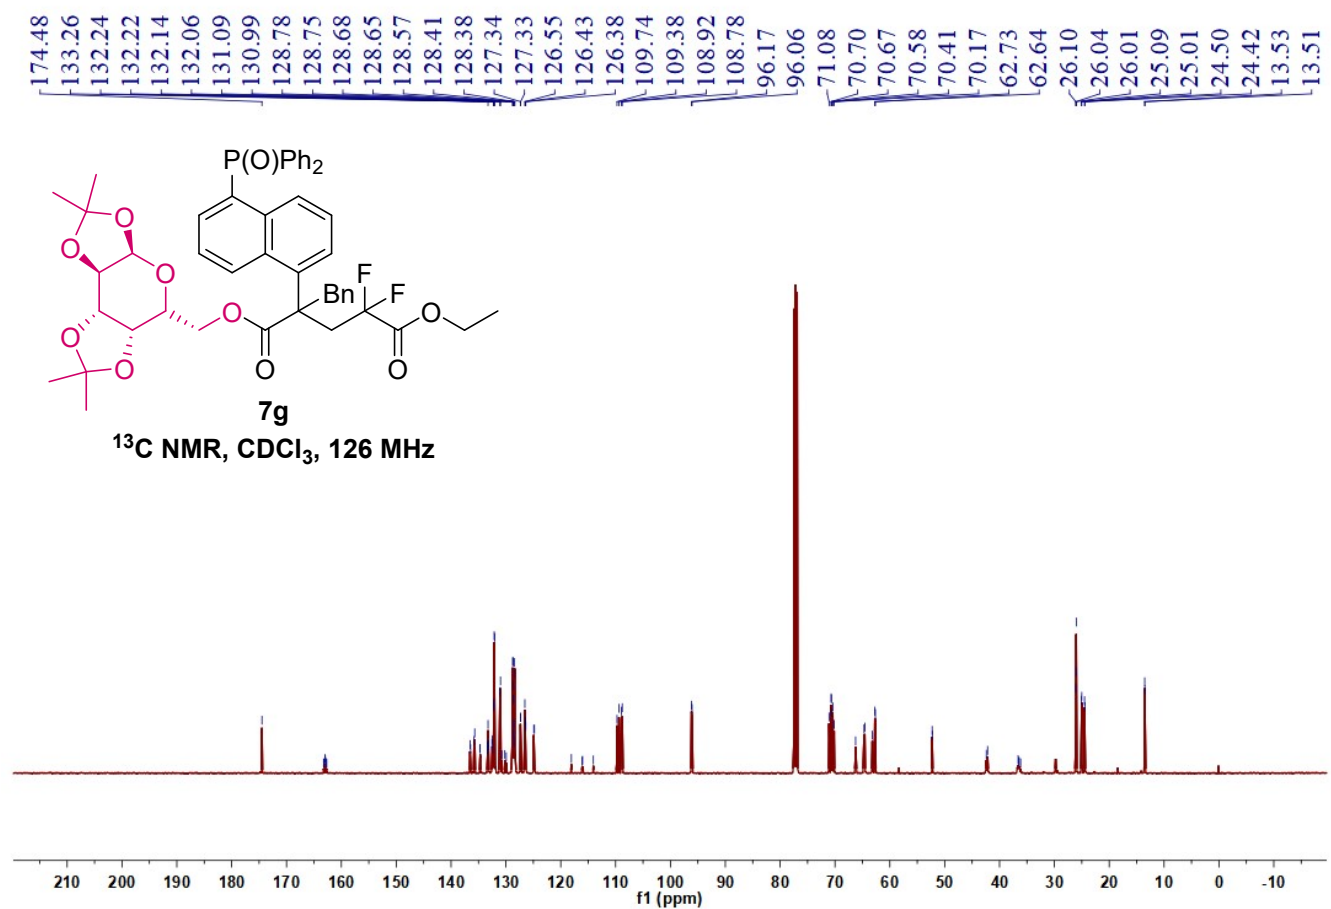

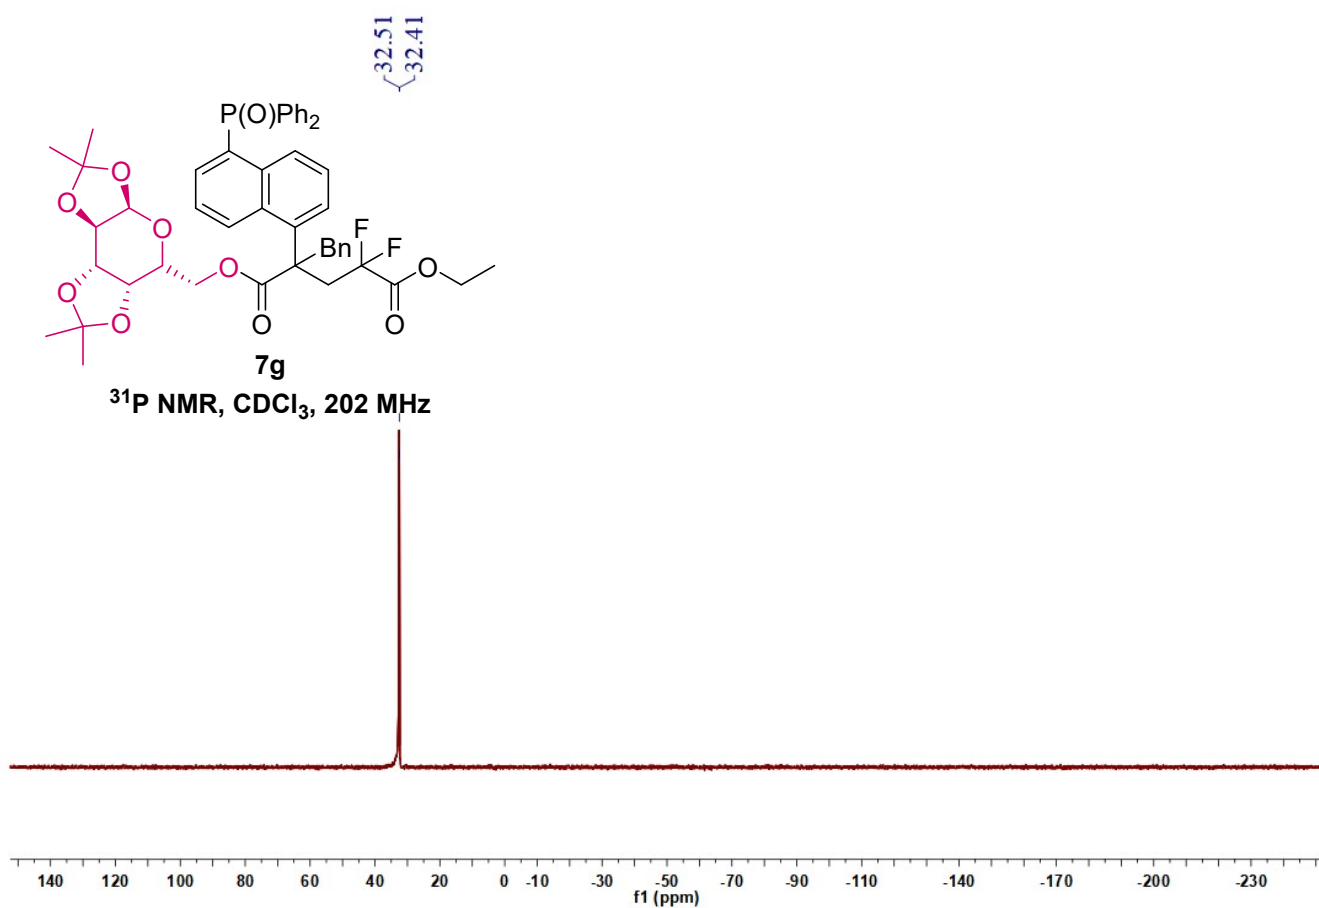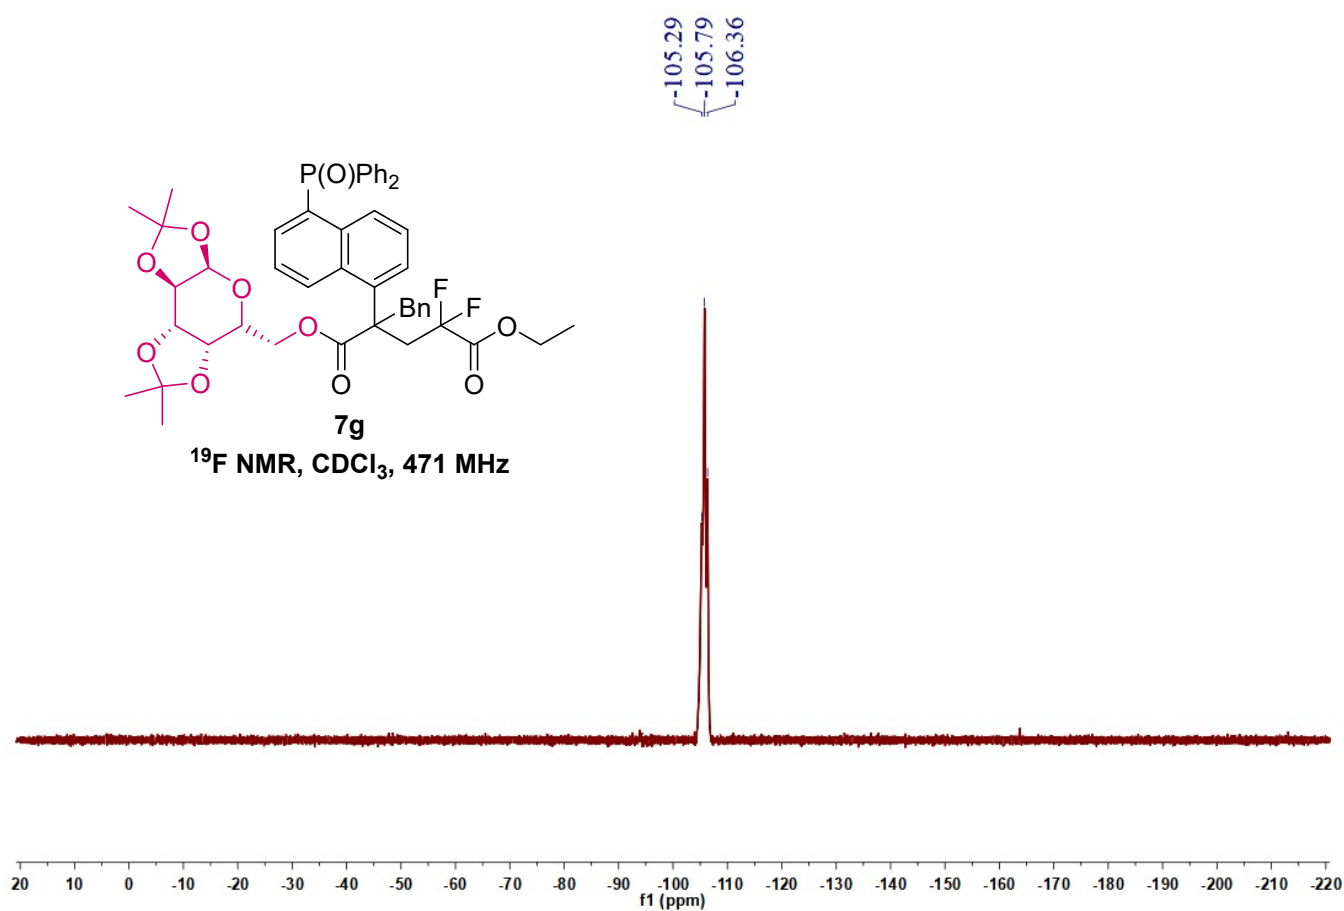

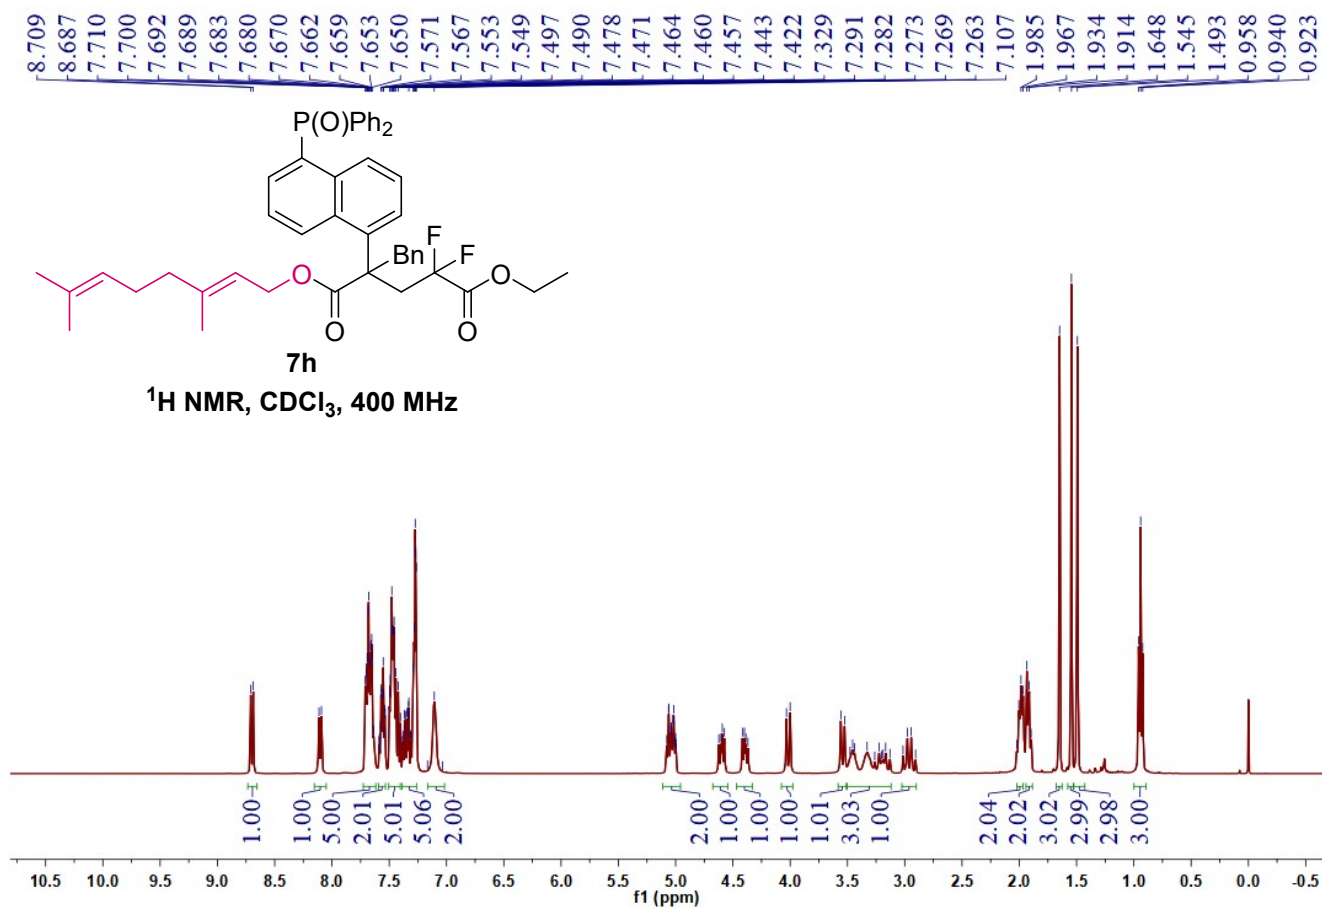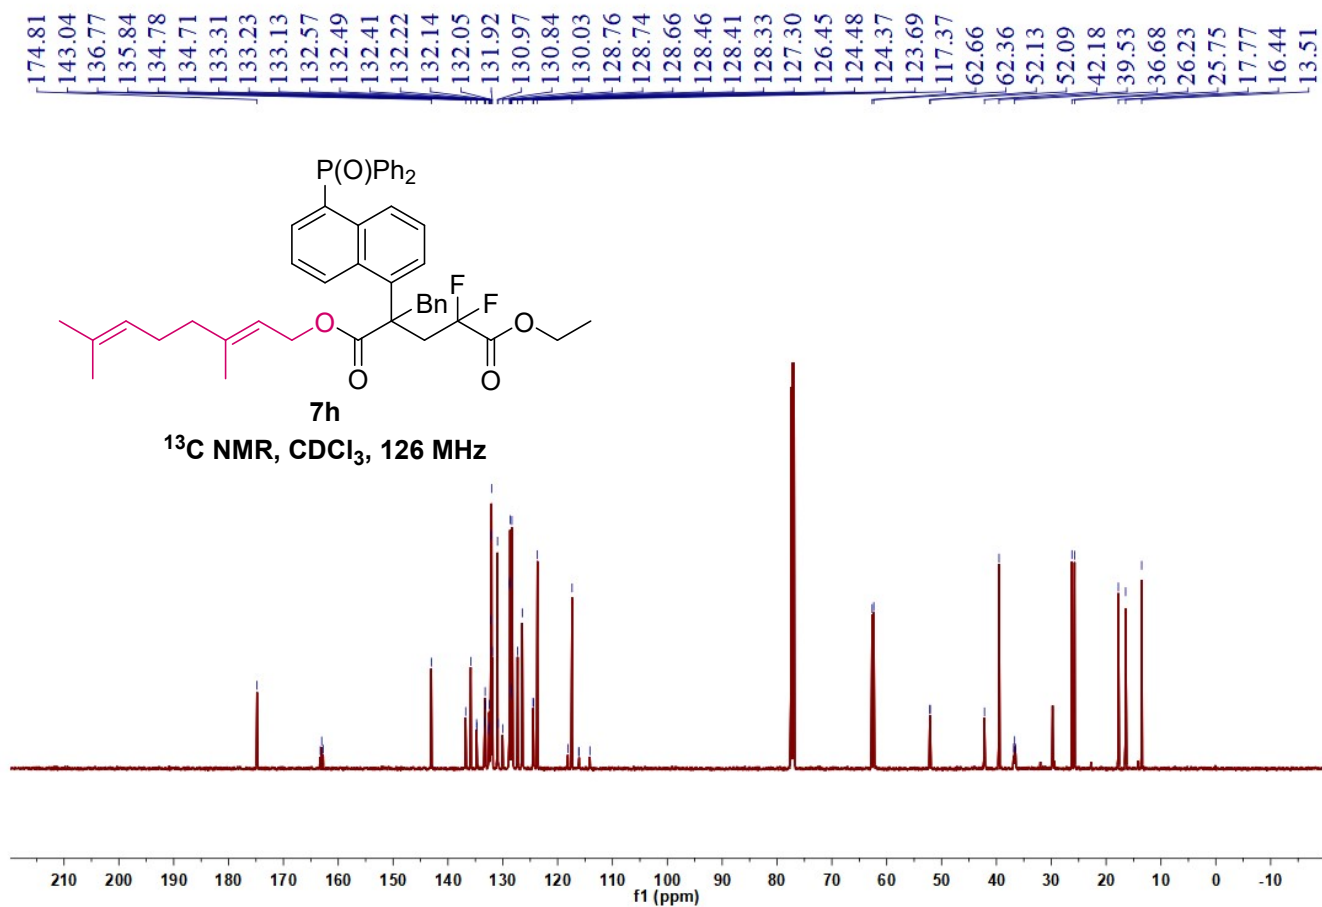

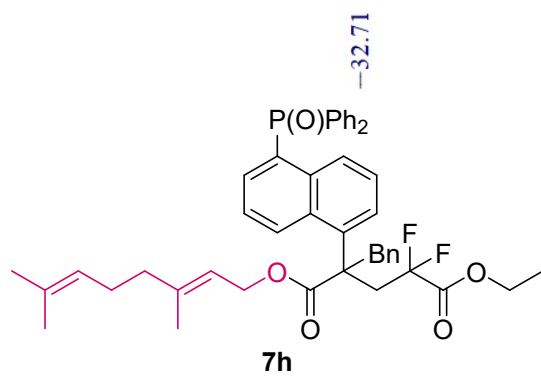

<sup>31</sup>P NMR, CDCl<sub>3</sub>, 202 MHz

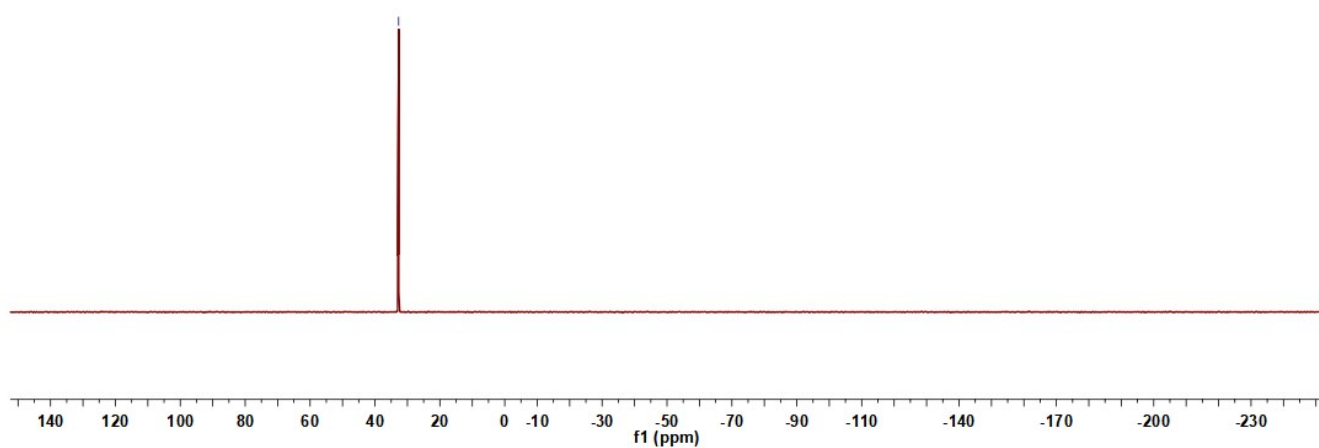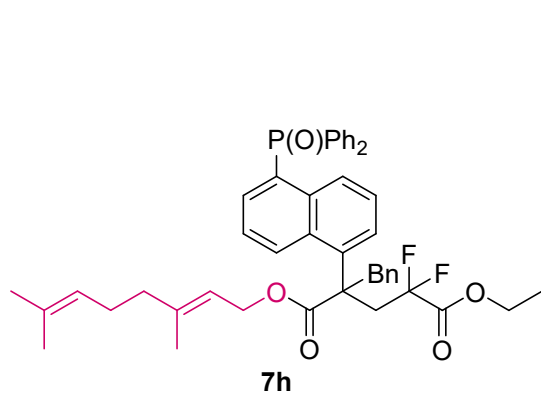

<sup>19</sup>F NMR, CDCl<sub>3</sub>, 471 MHz

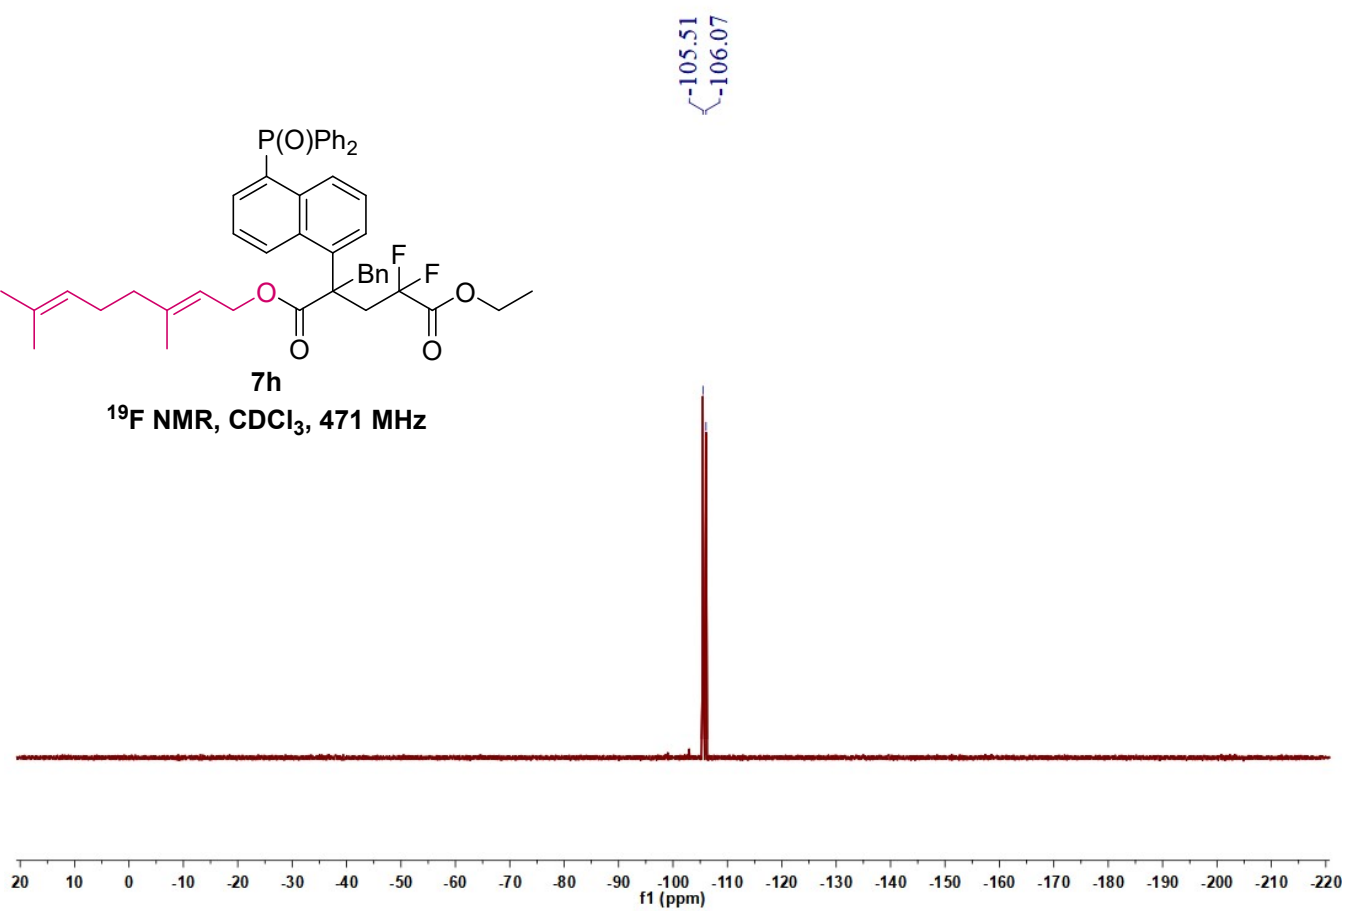



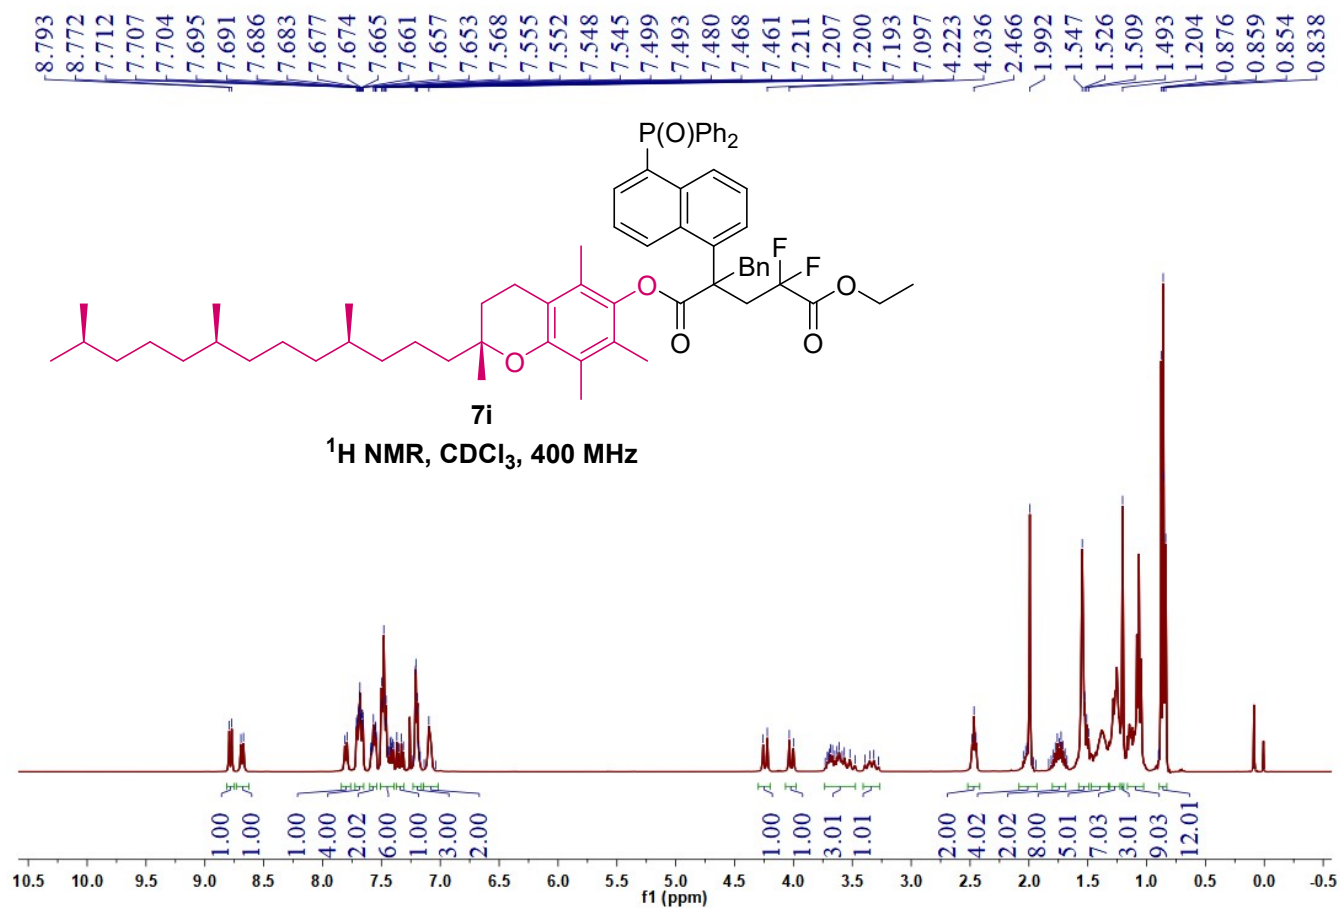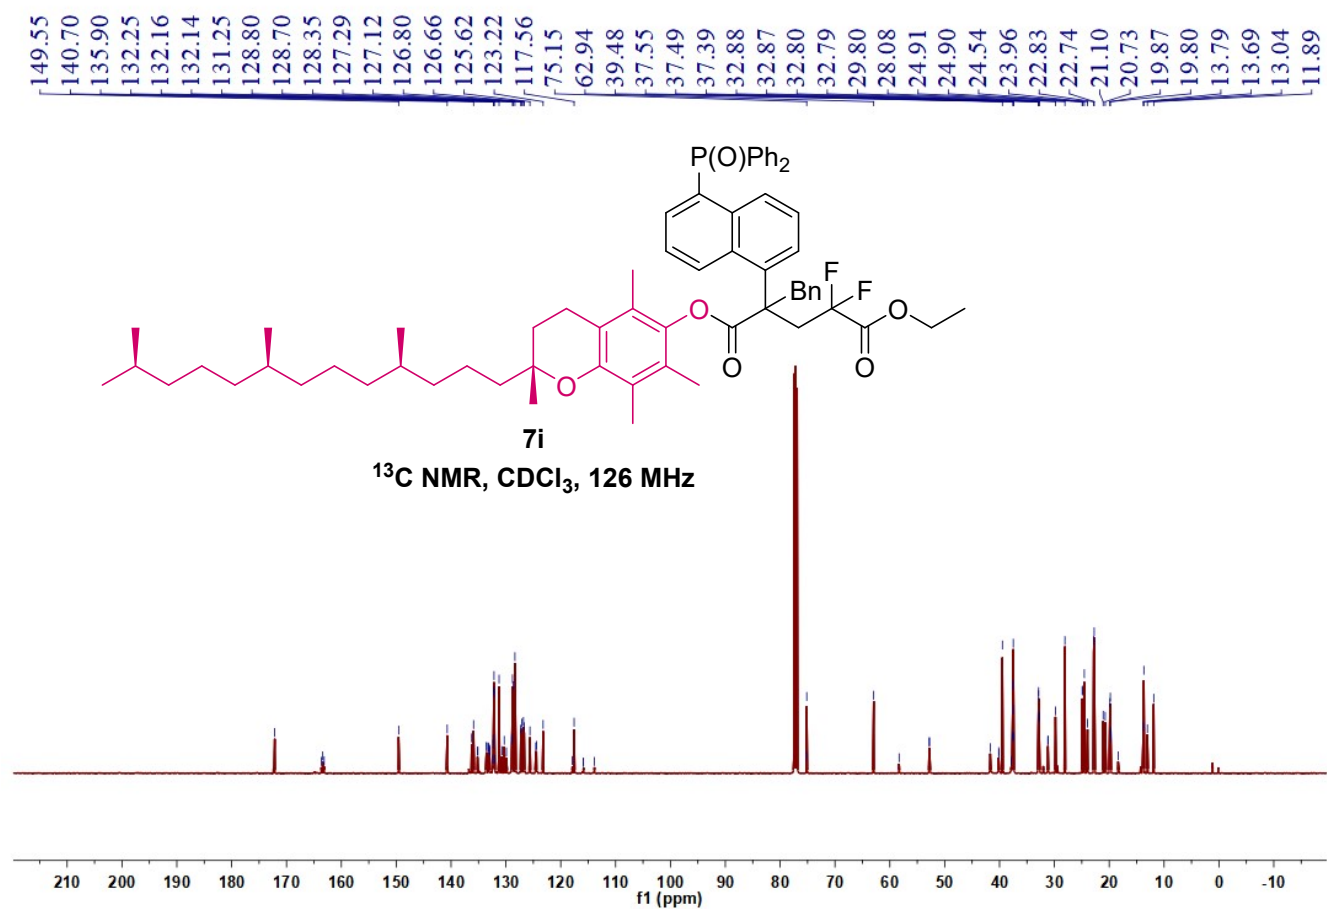

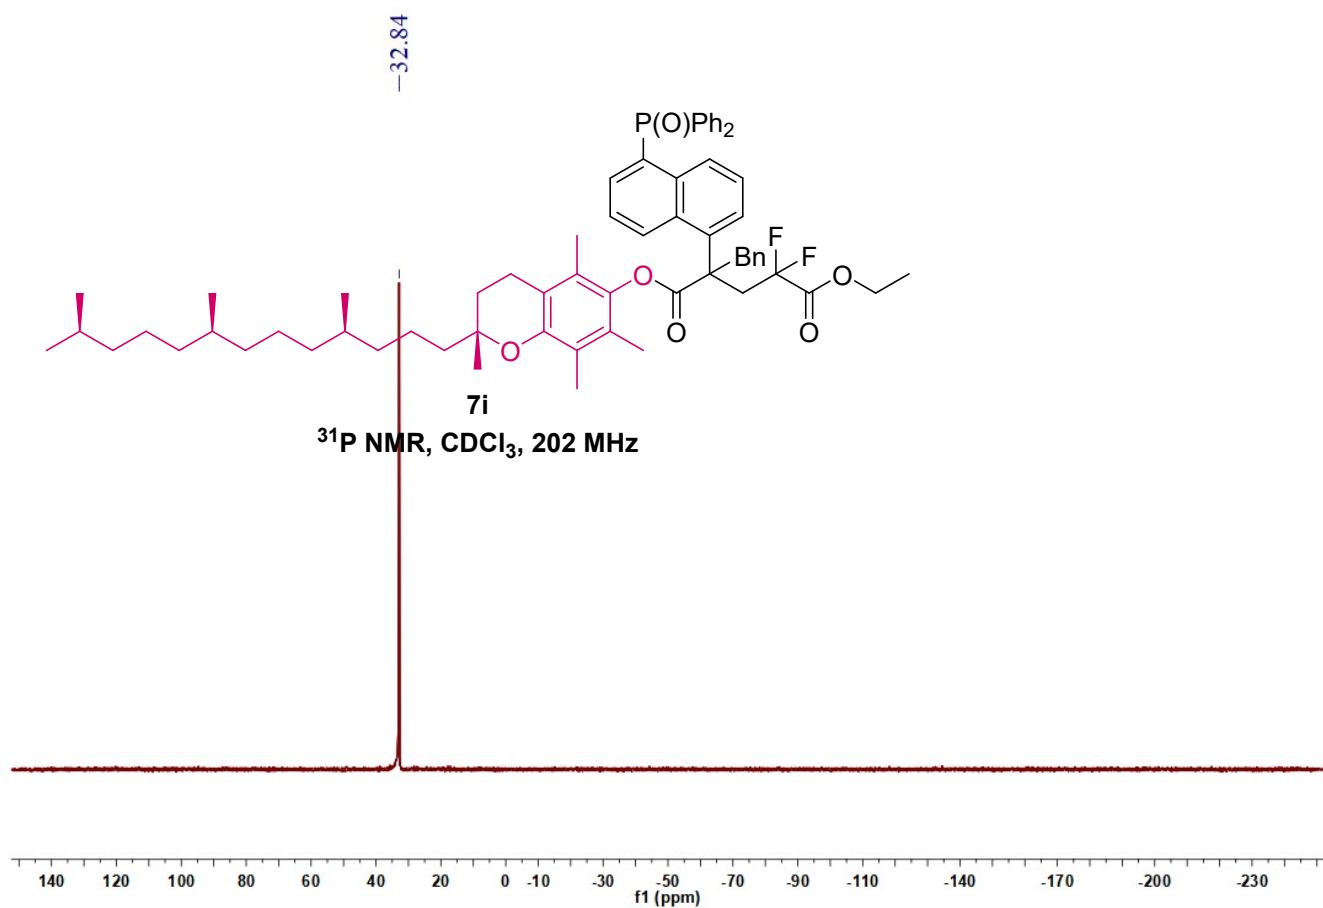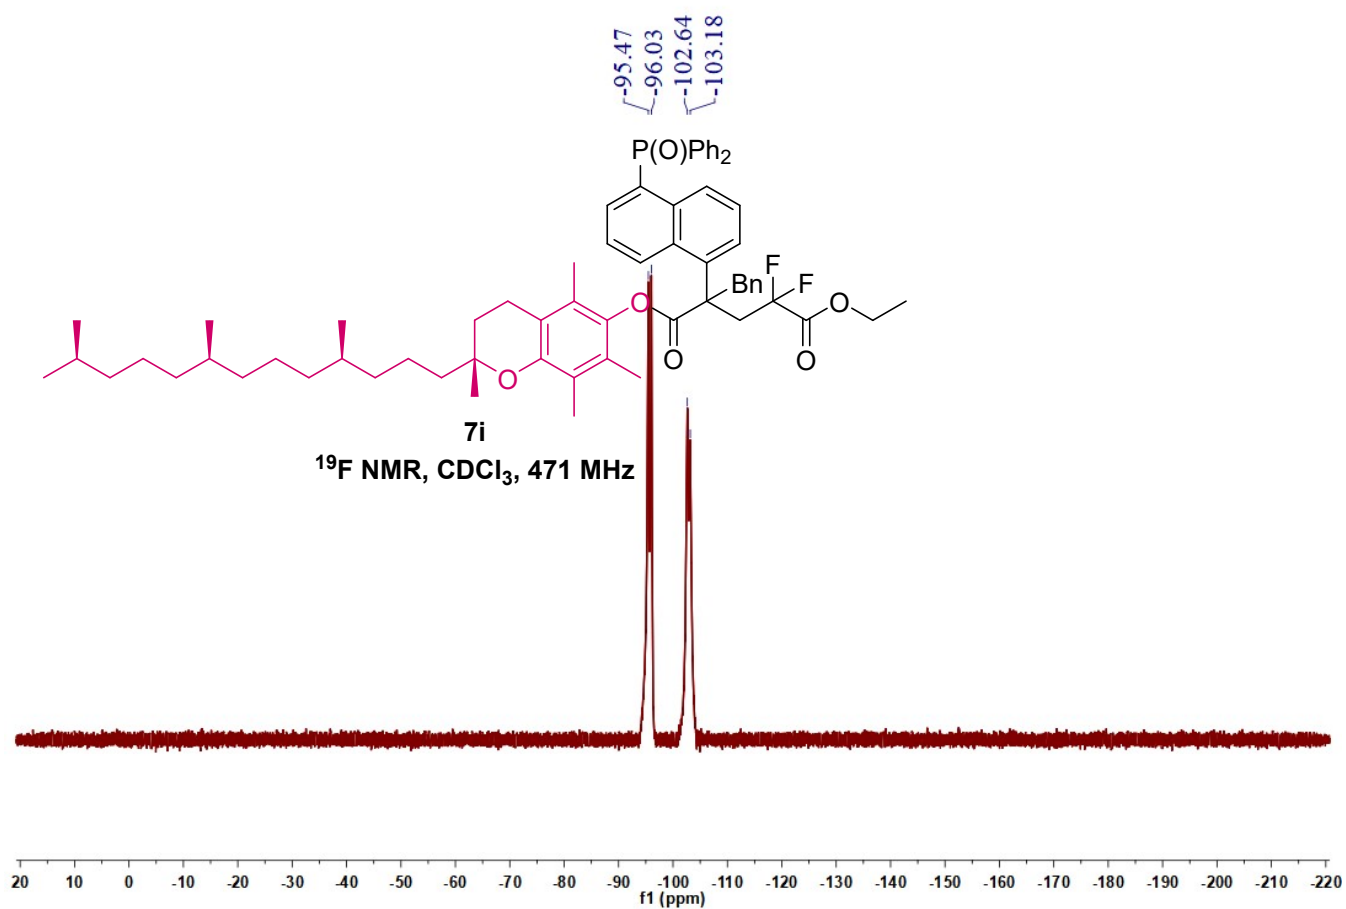

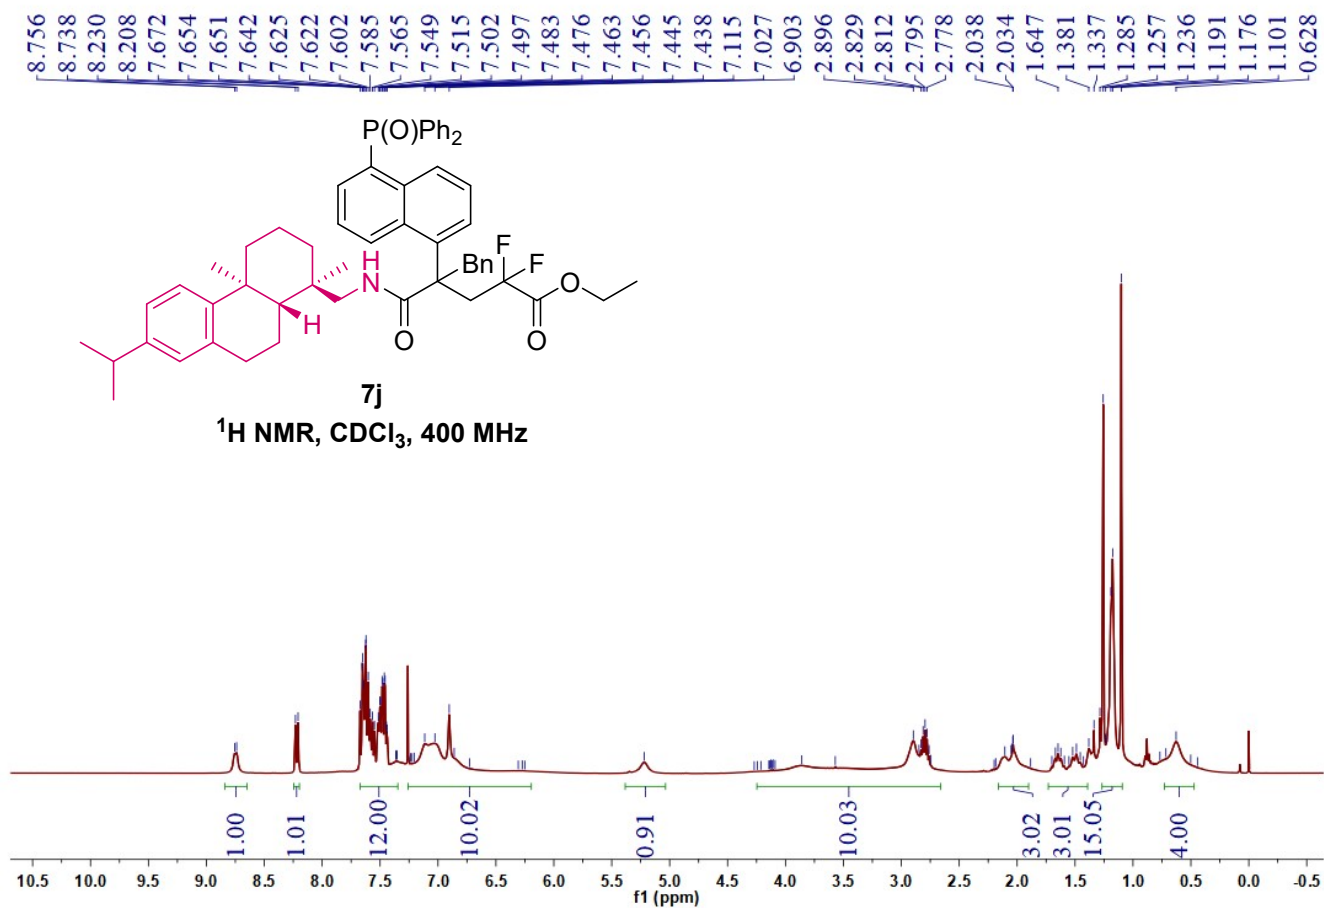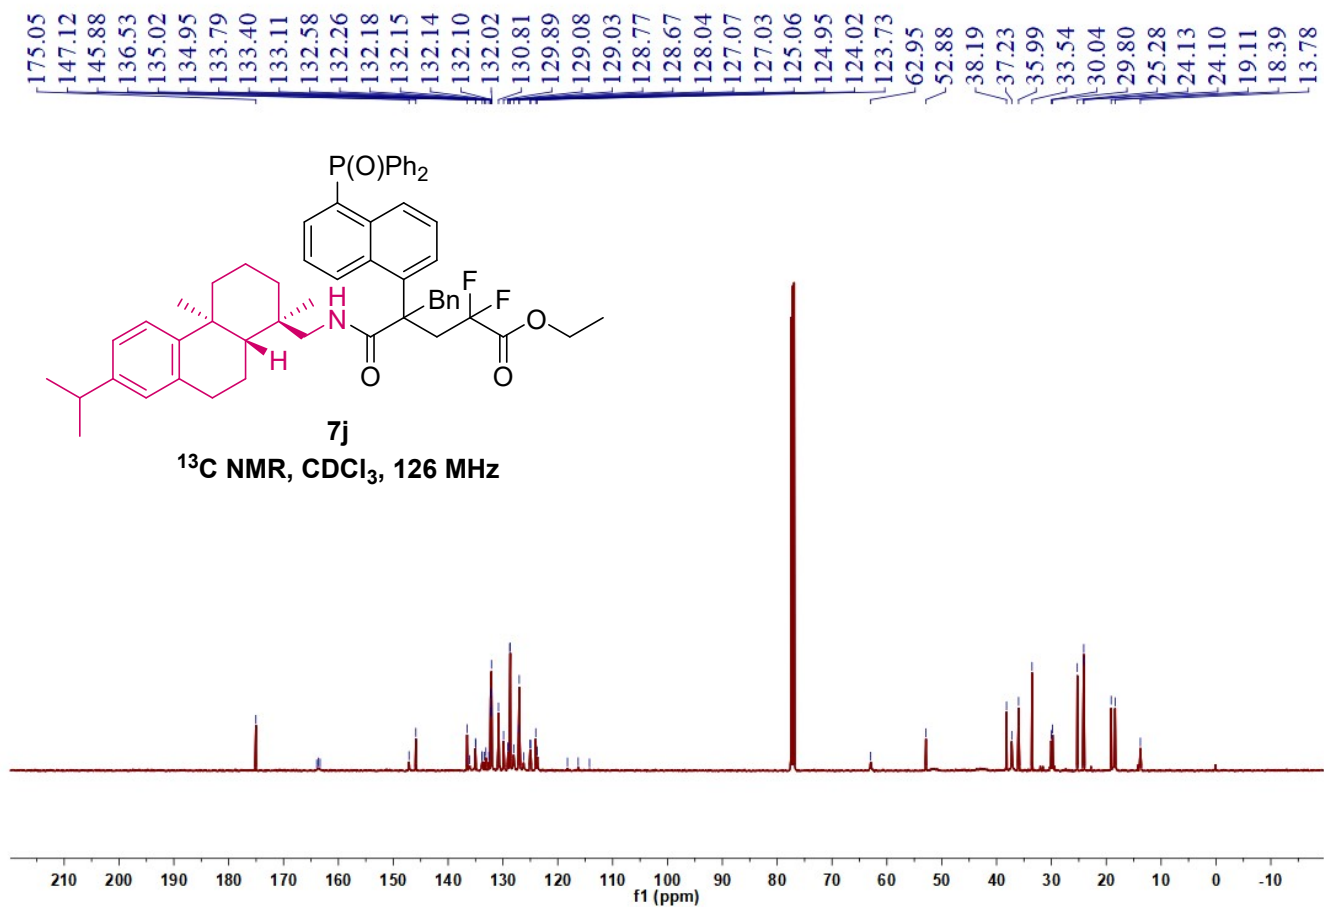

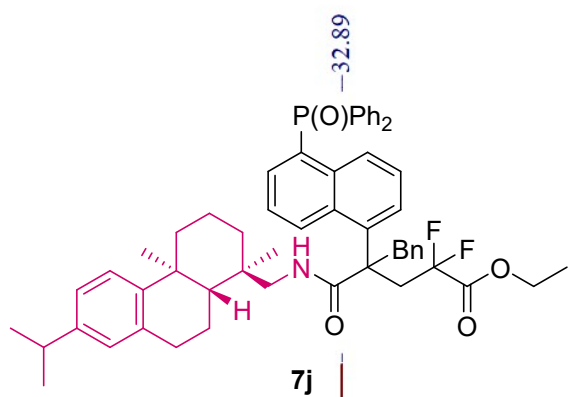

$^{31}\text{P}$  NMR,  $\text{CDCl}_3$ , 202 MHz

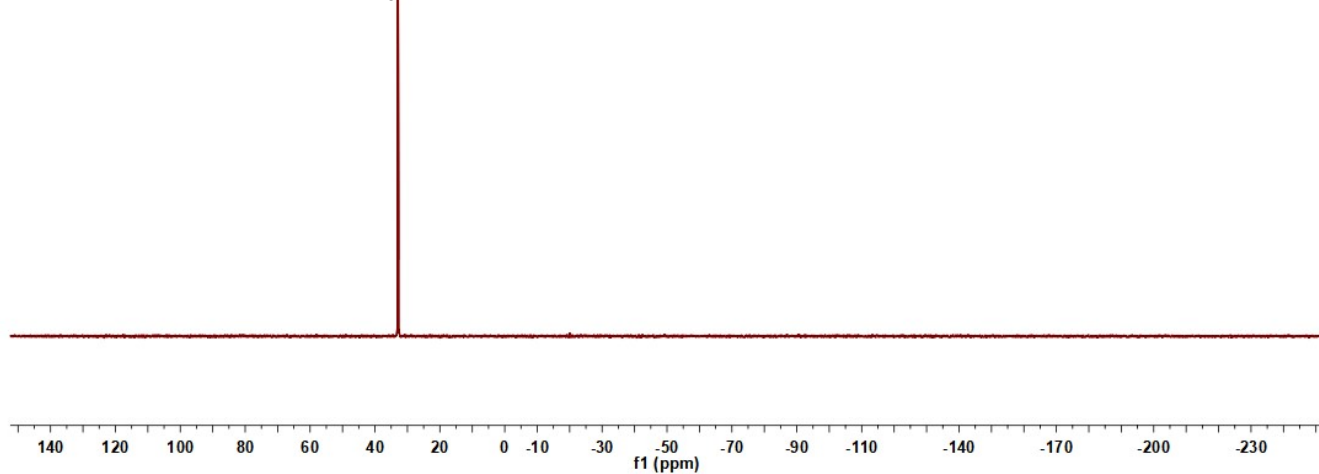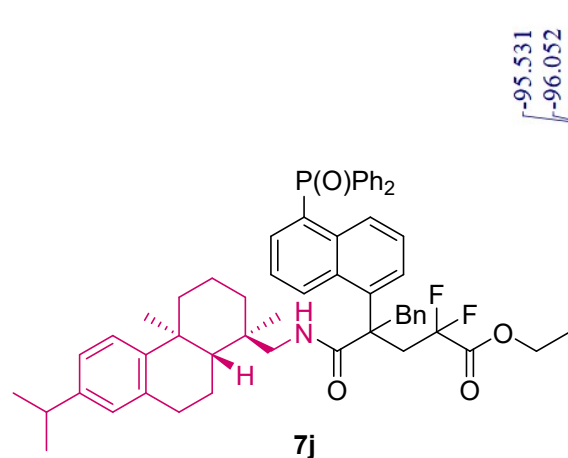

$^{19}\text{F}$  NMR,  $\text{CDCl}_3$ , 471 MHz

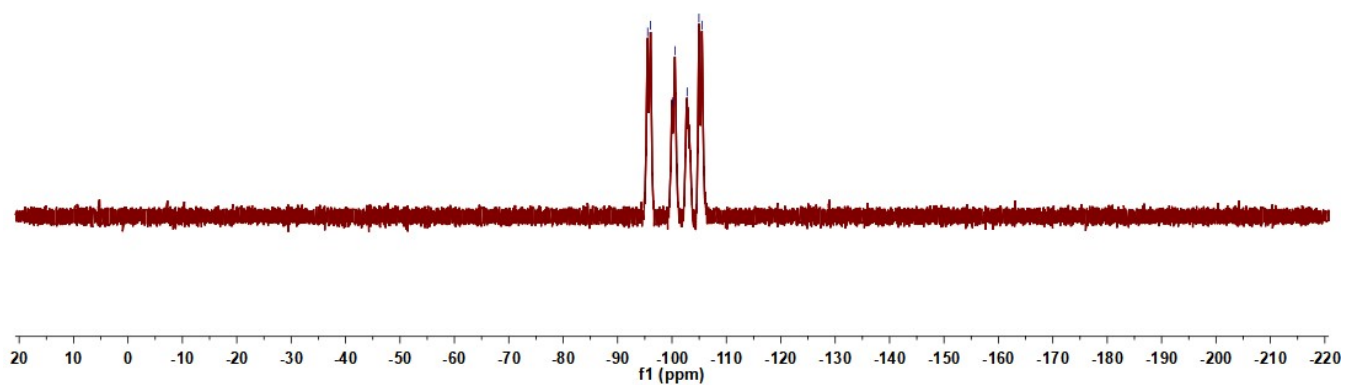

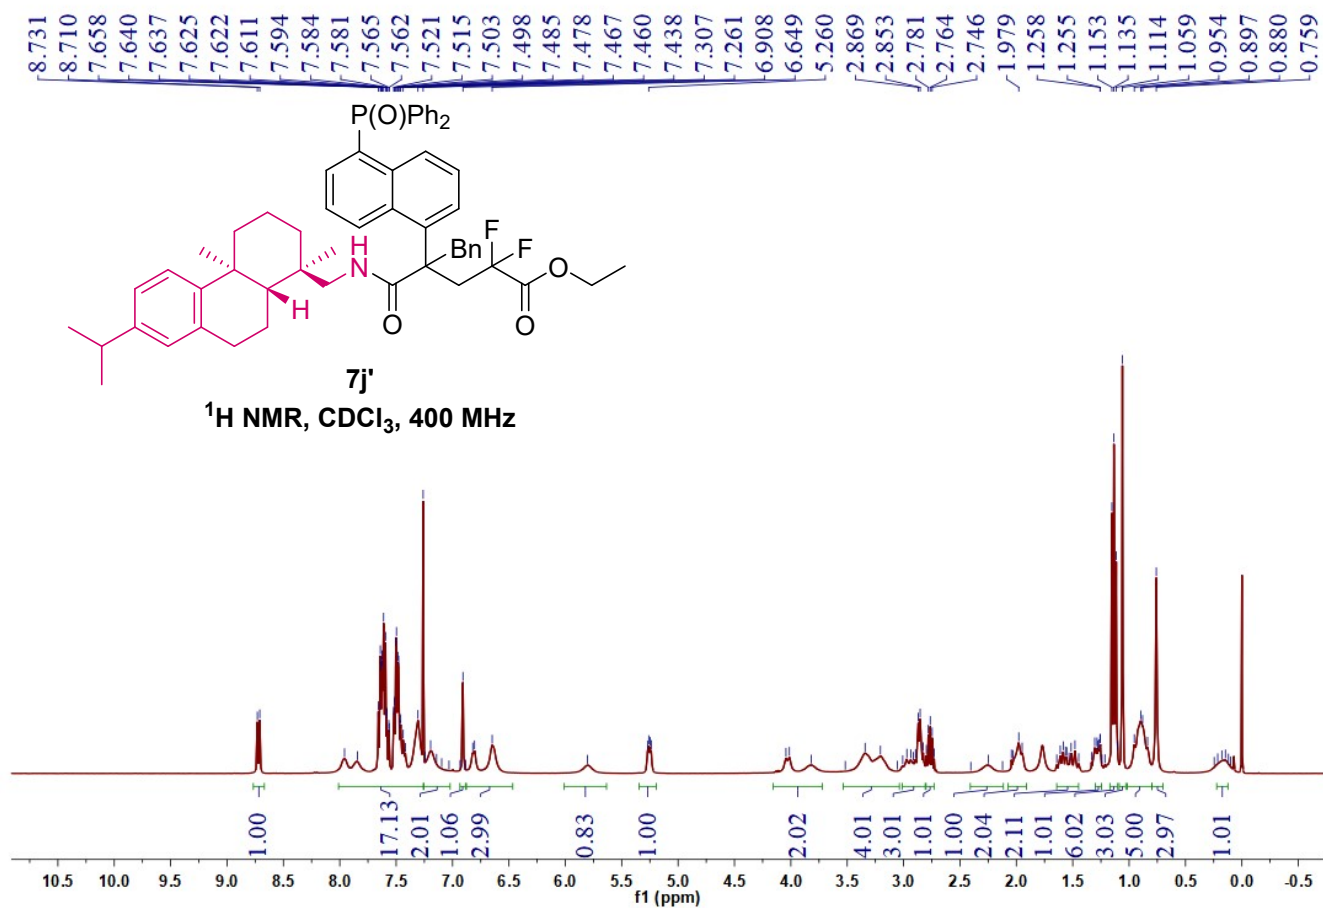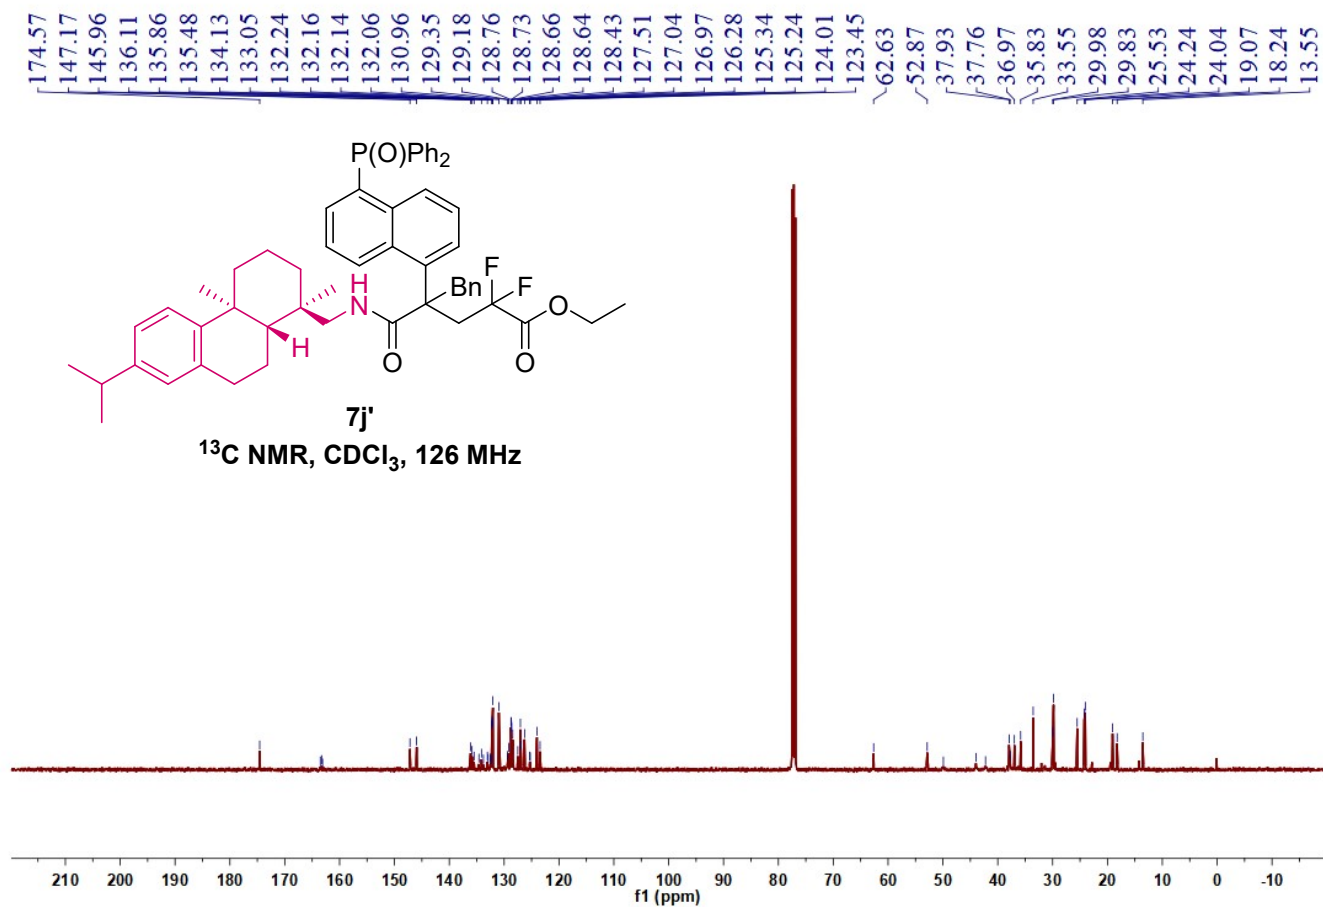

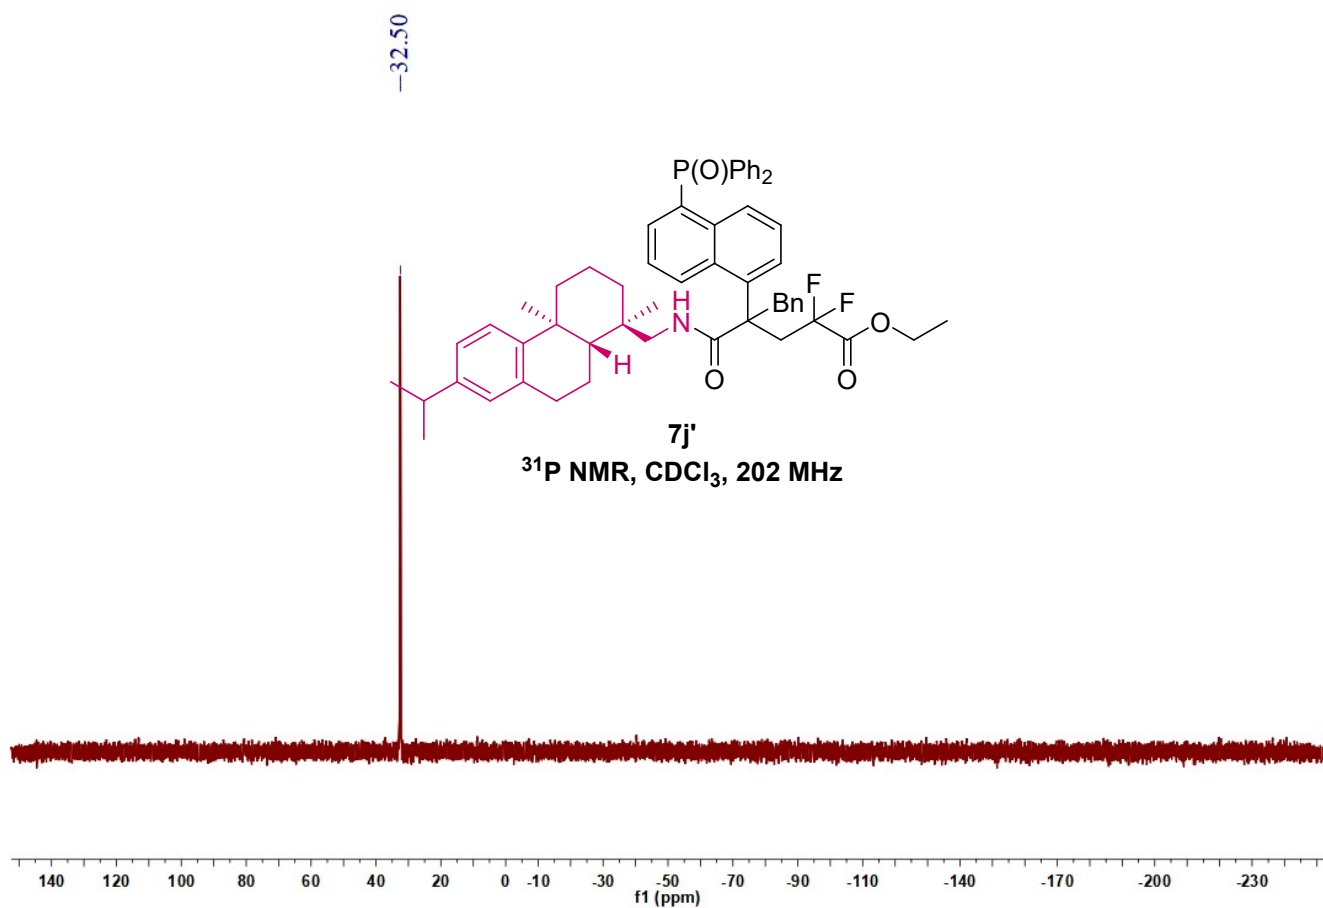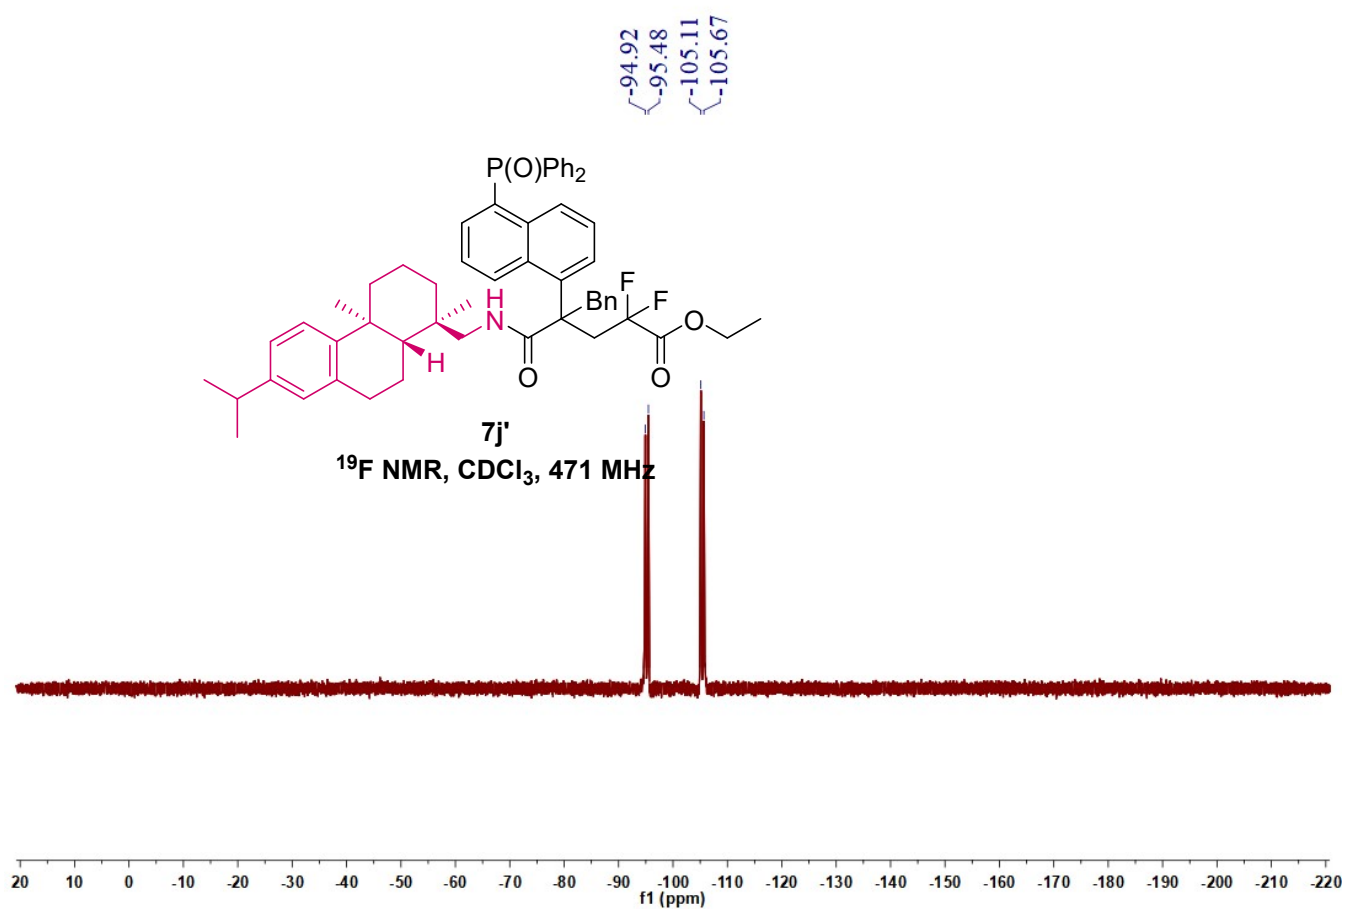



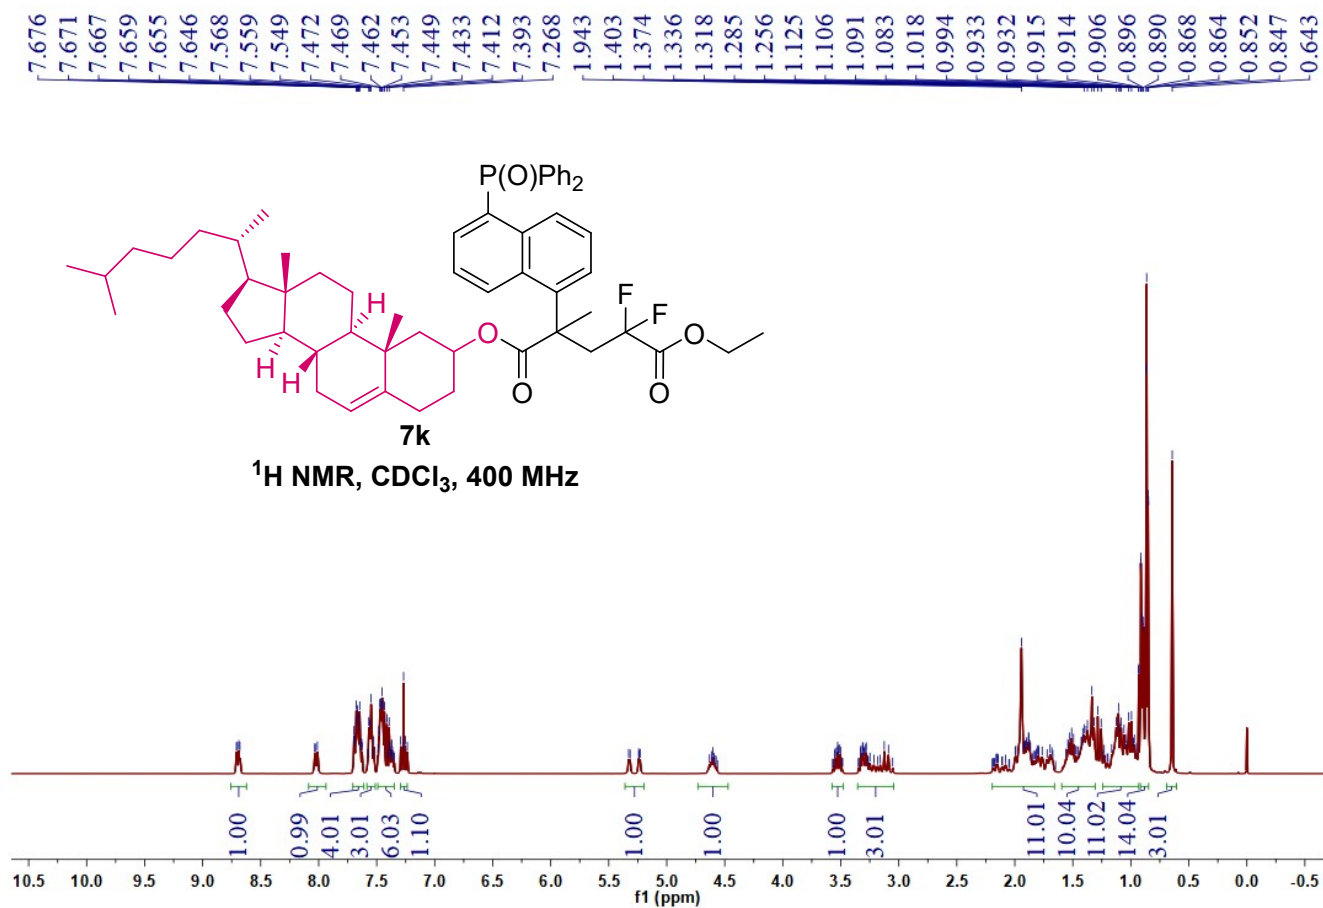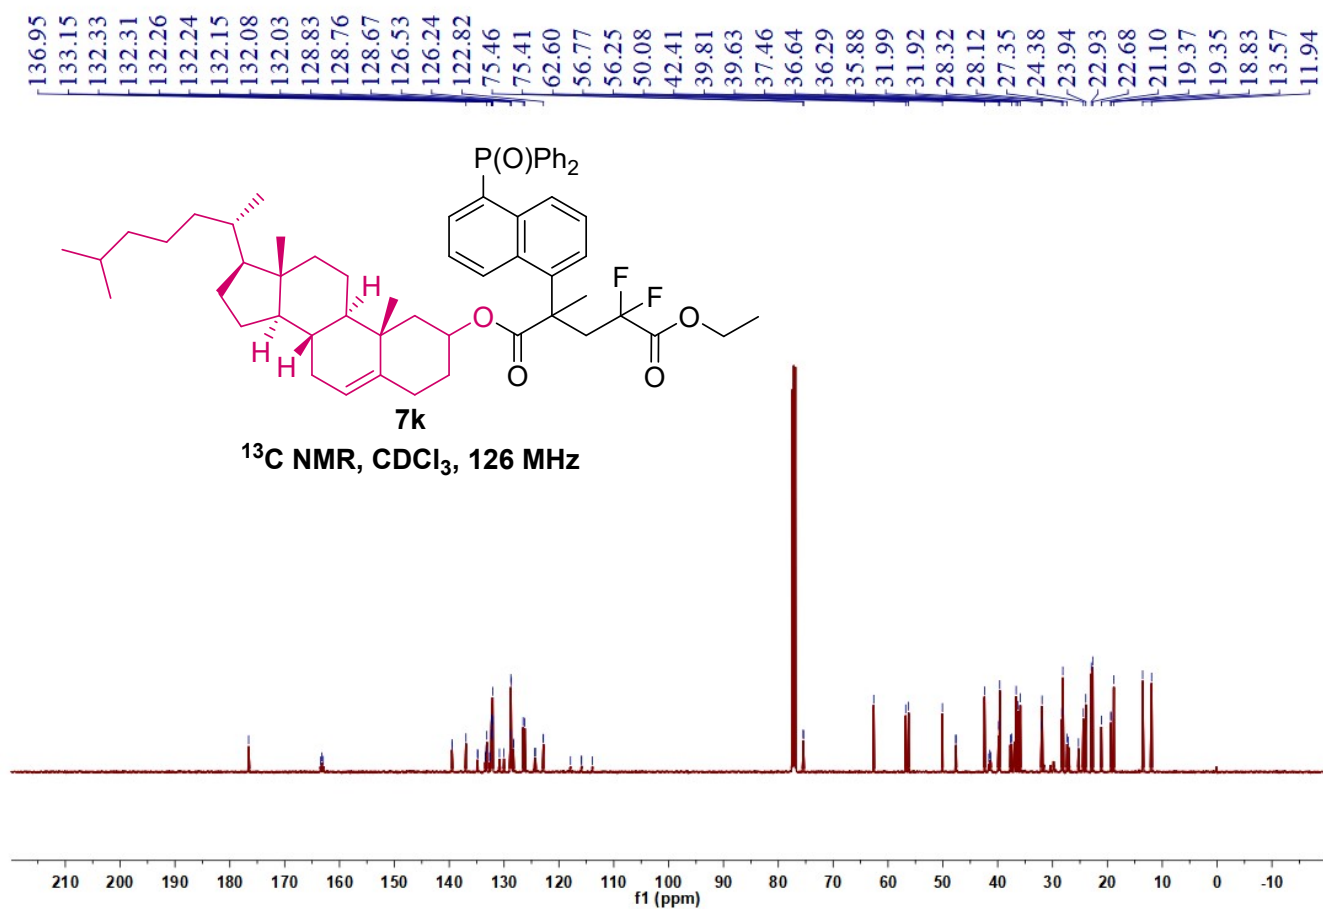



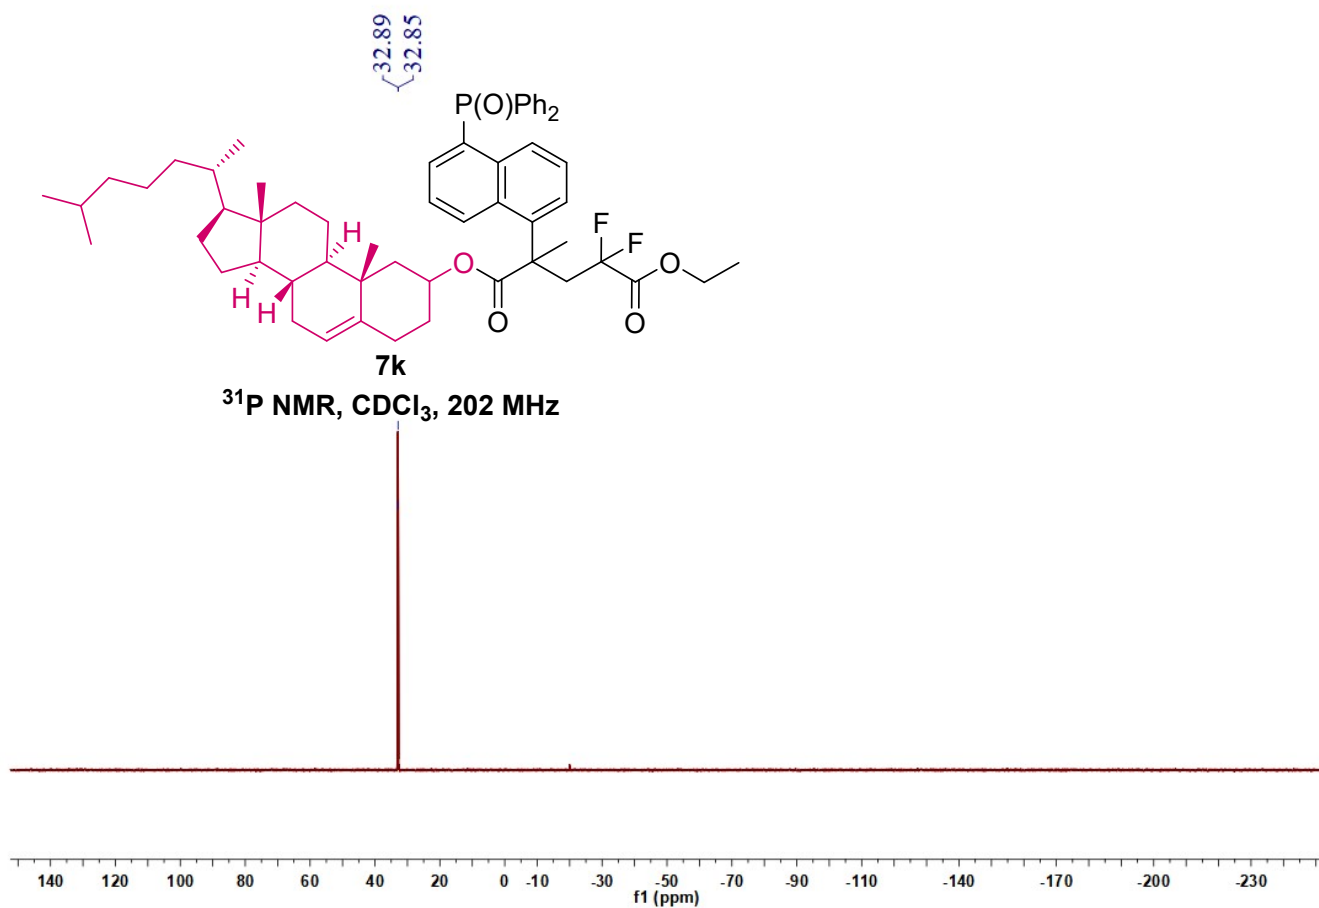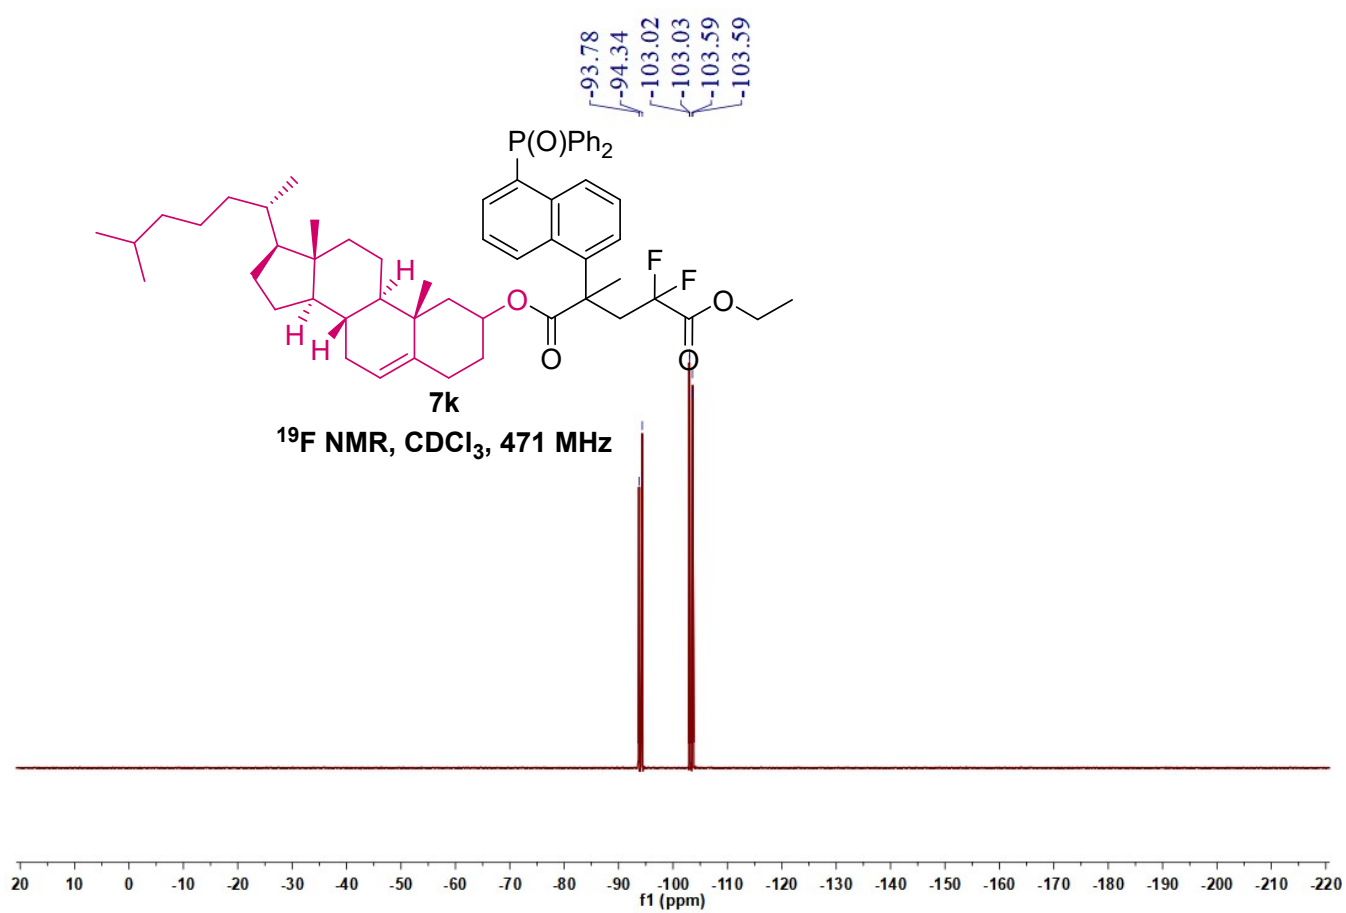

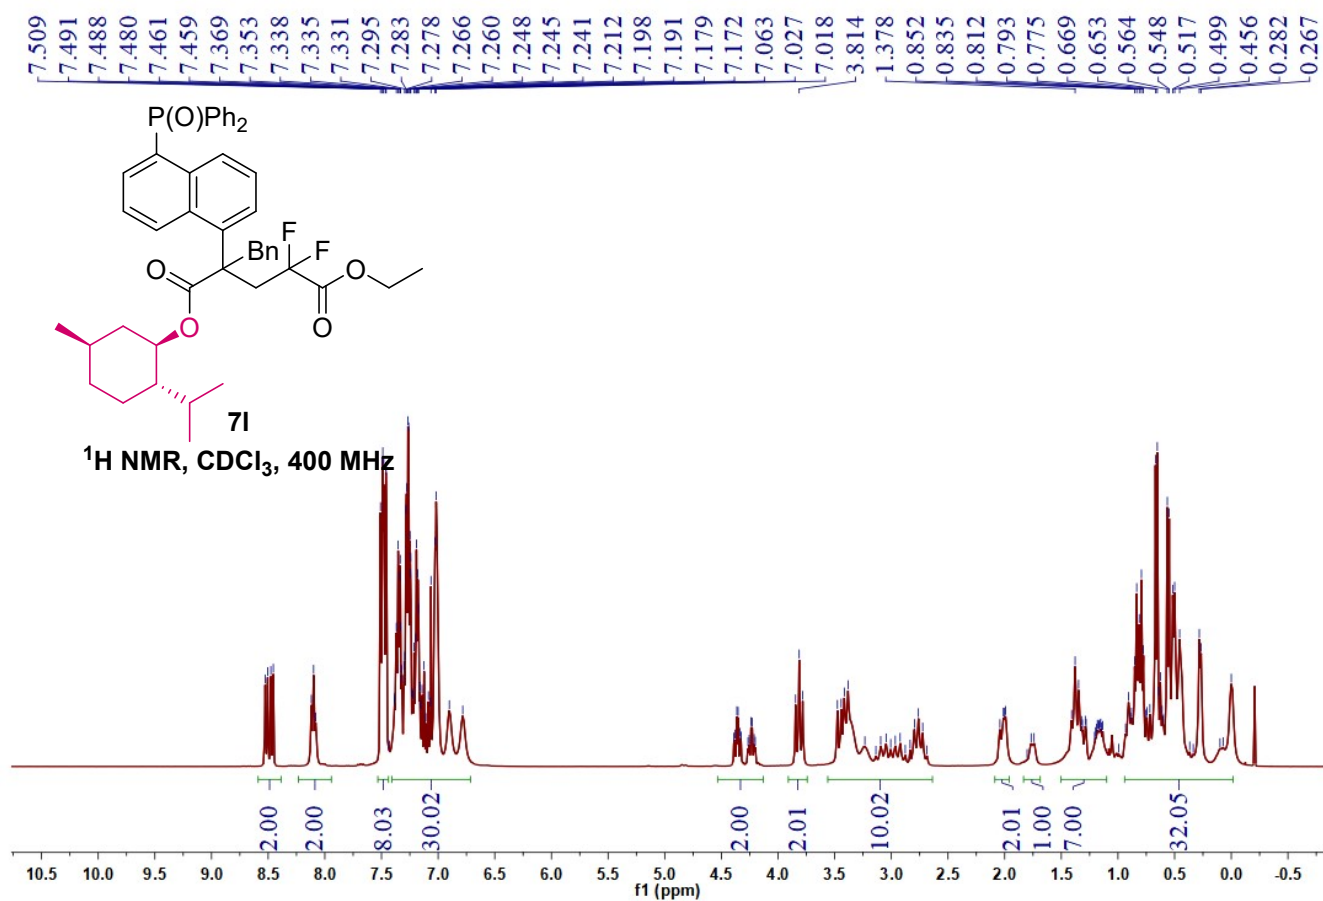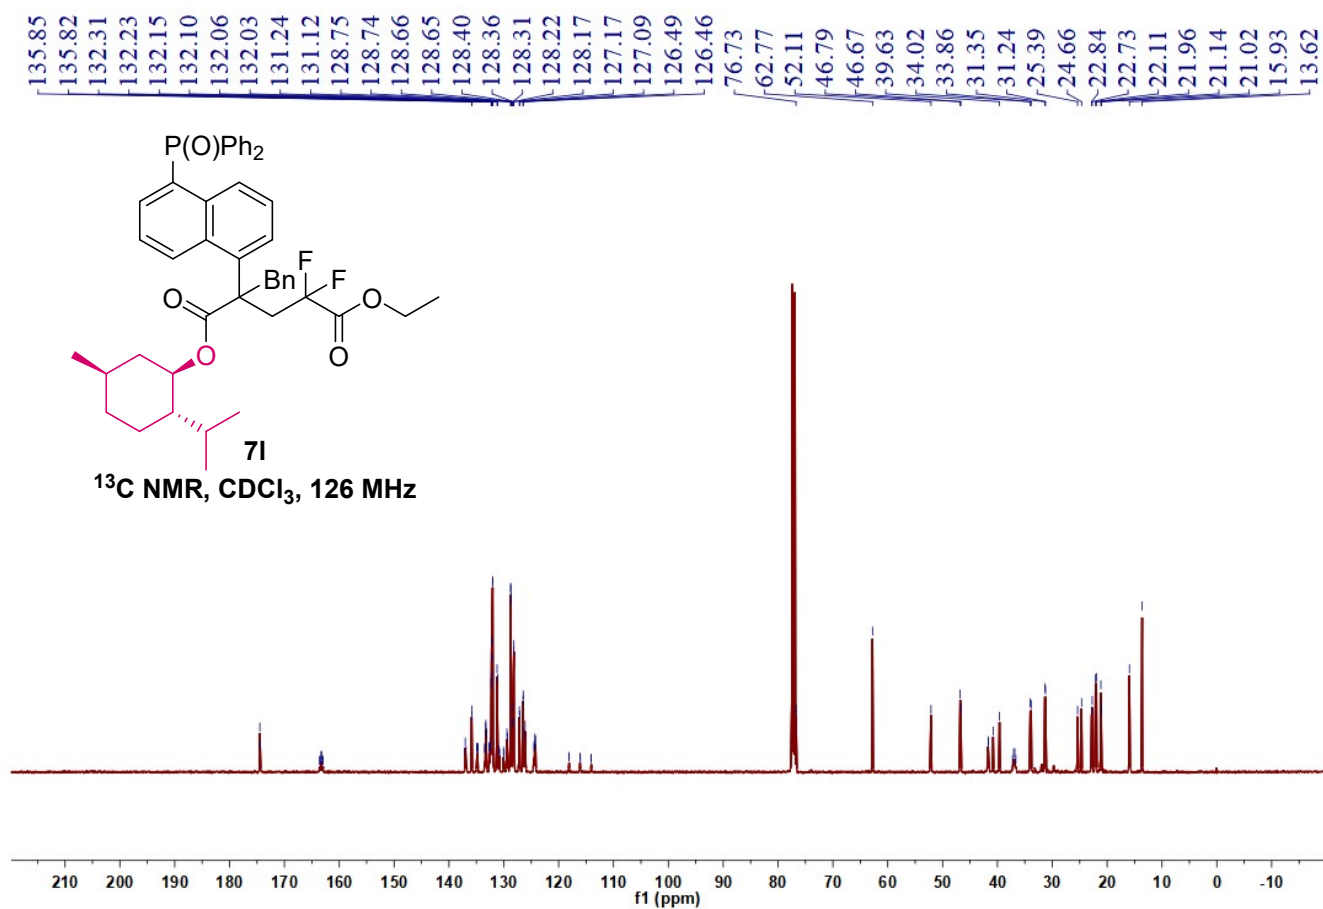

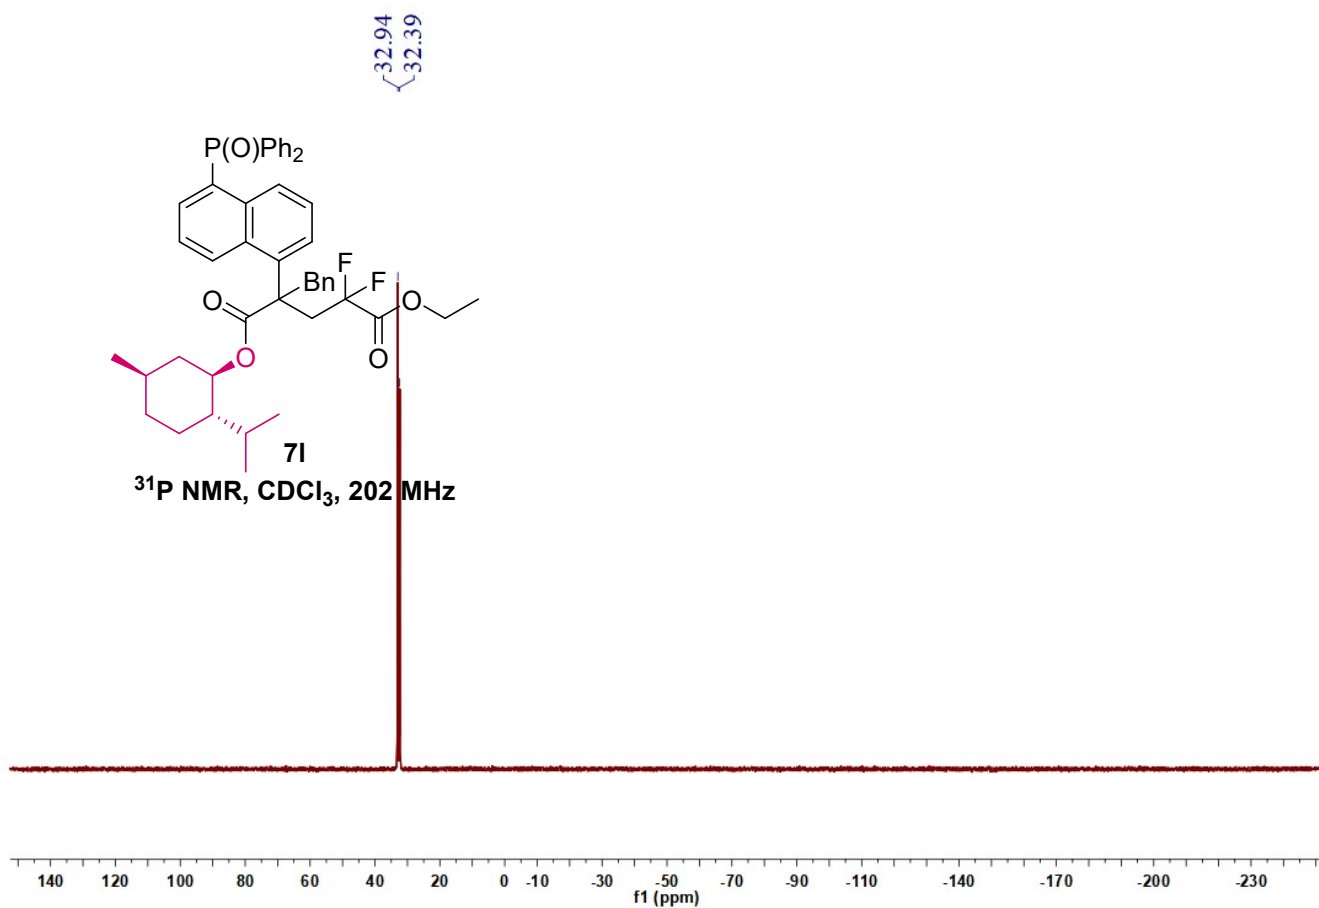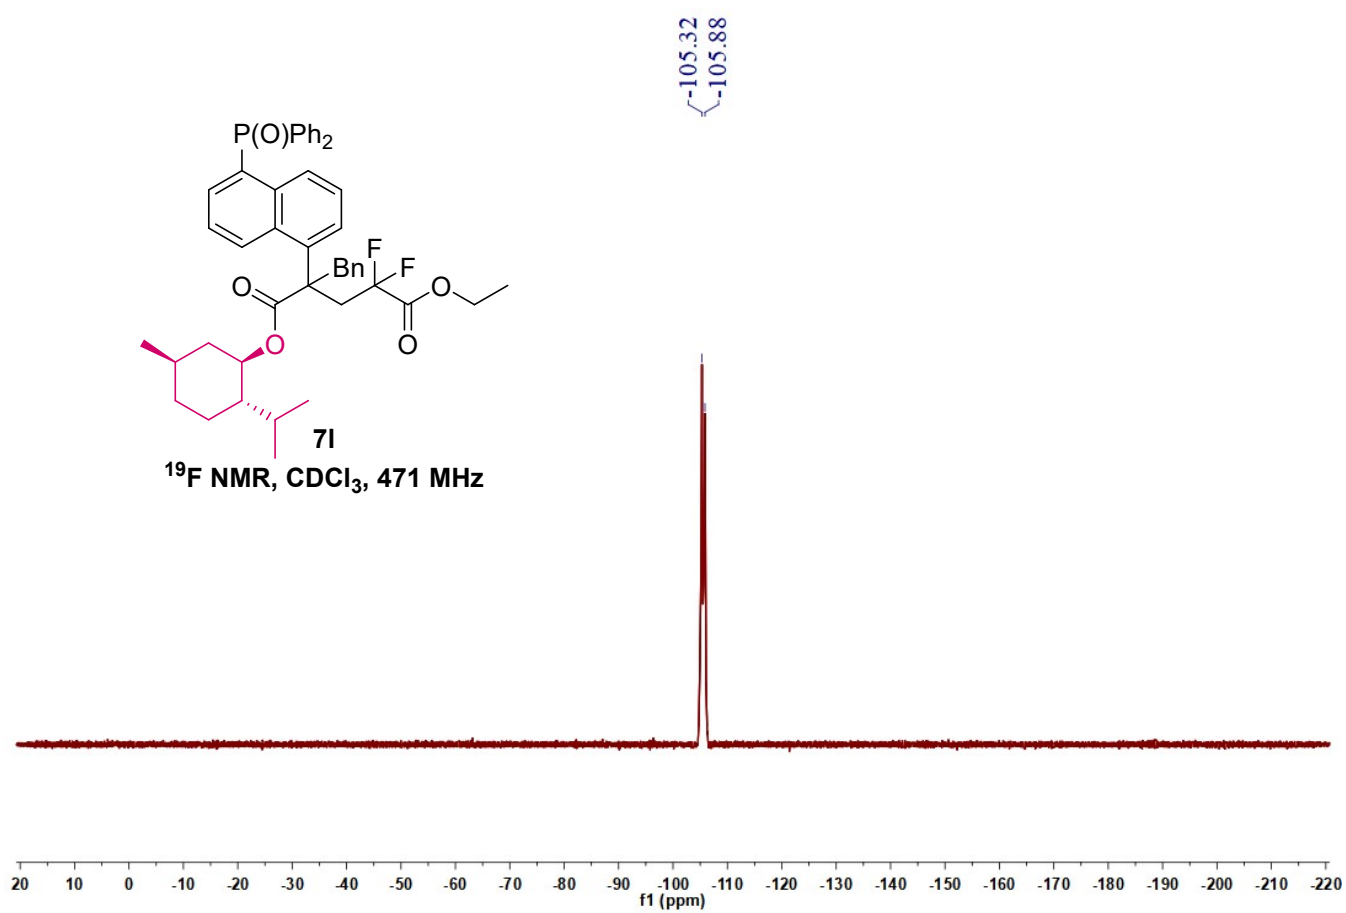

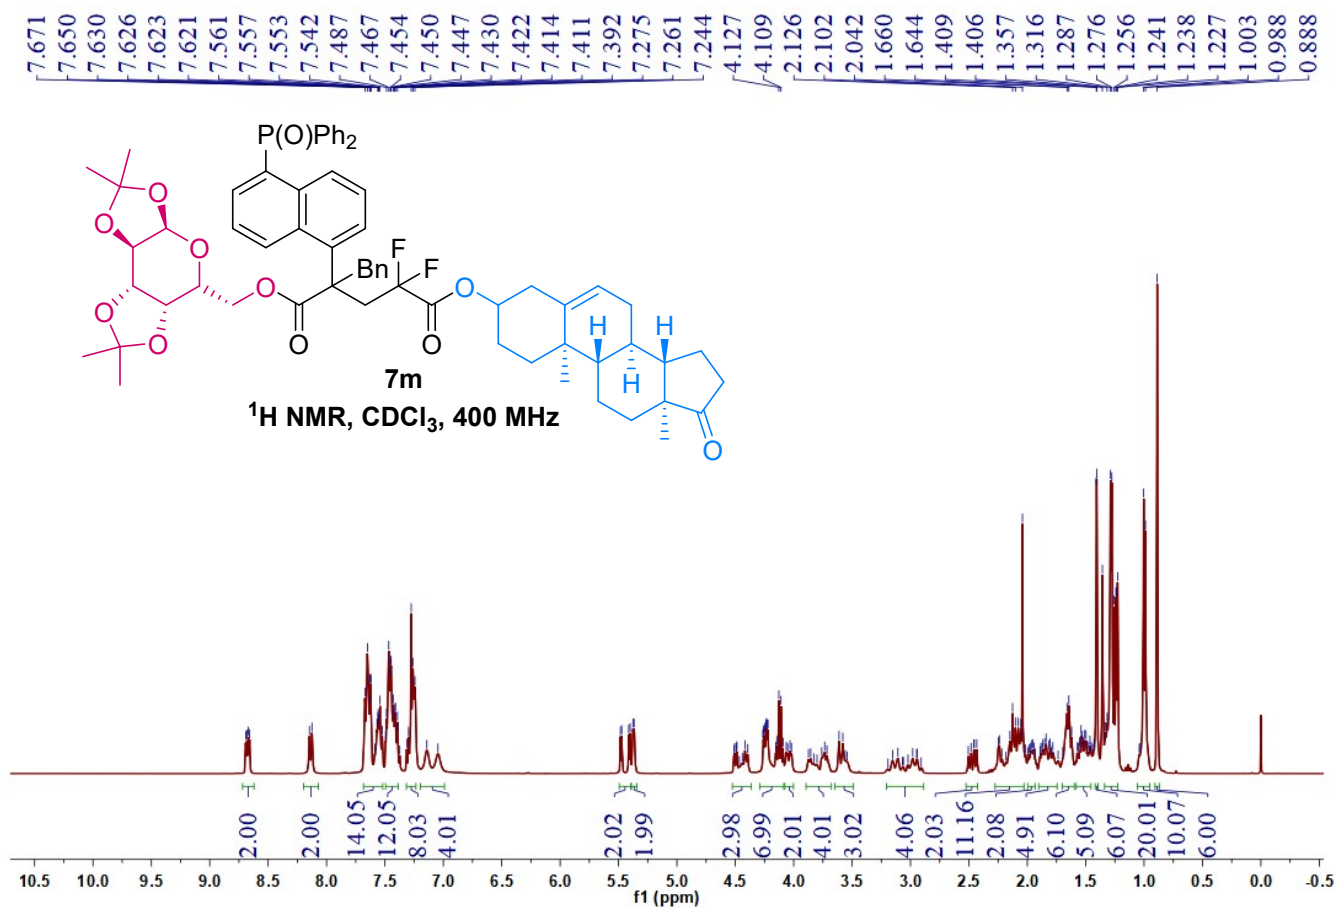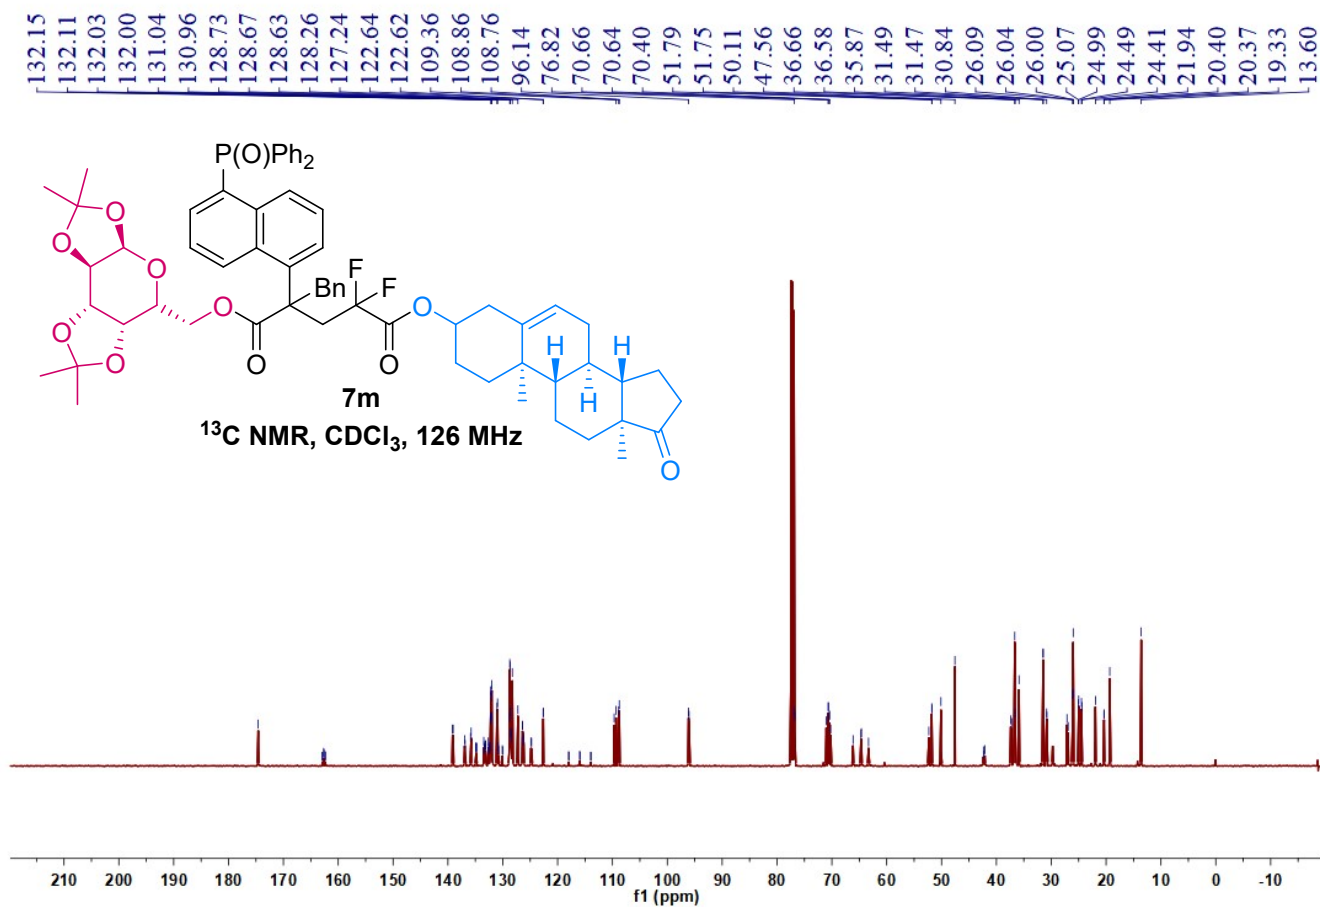

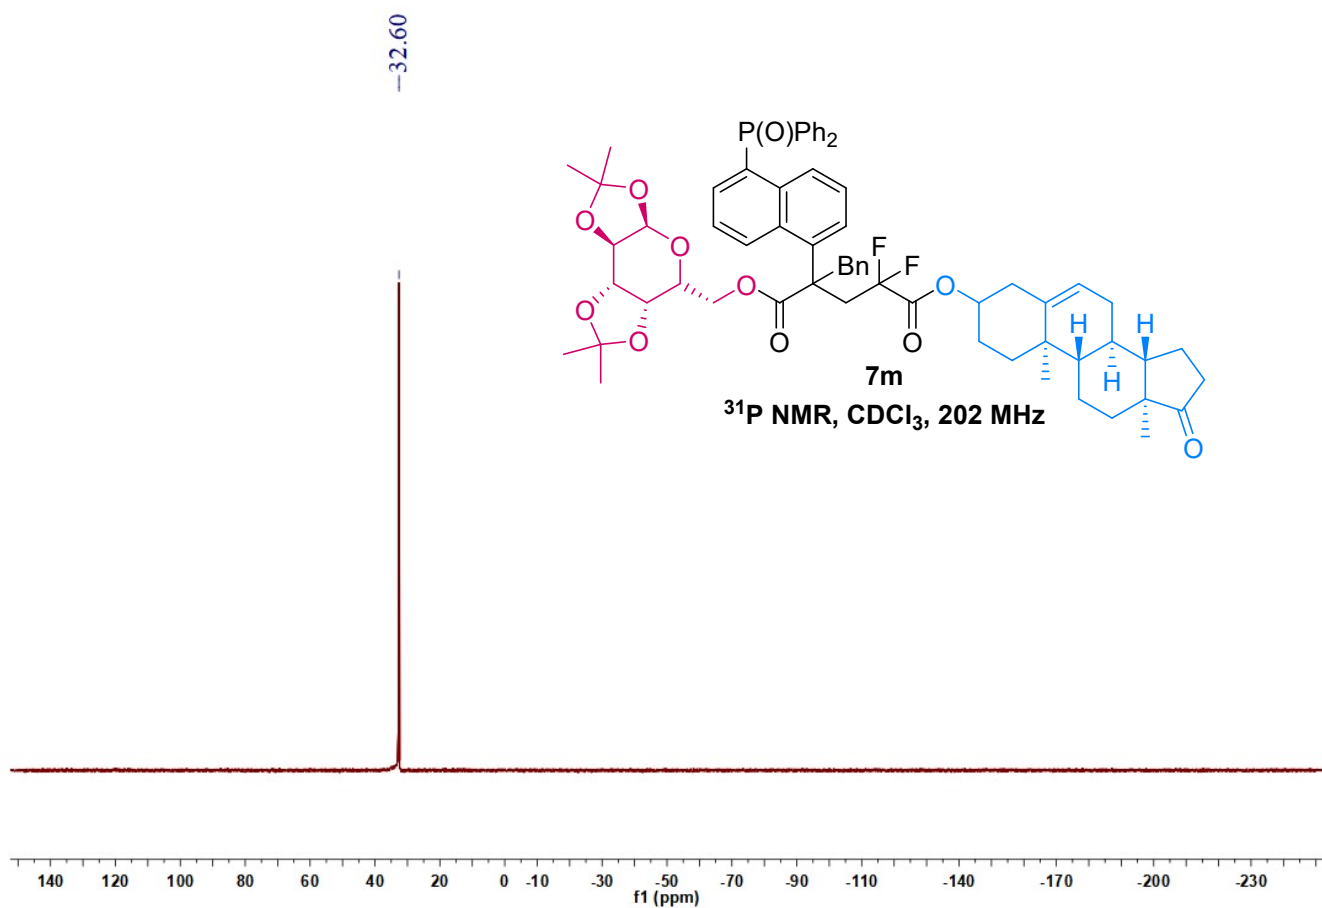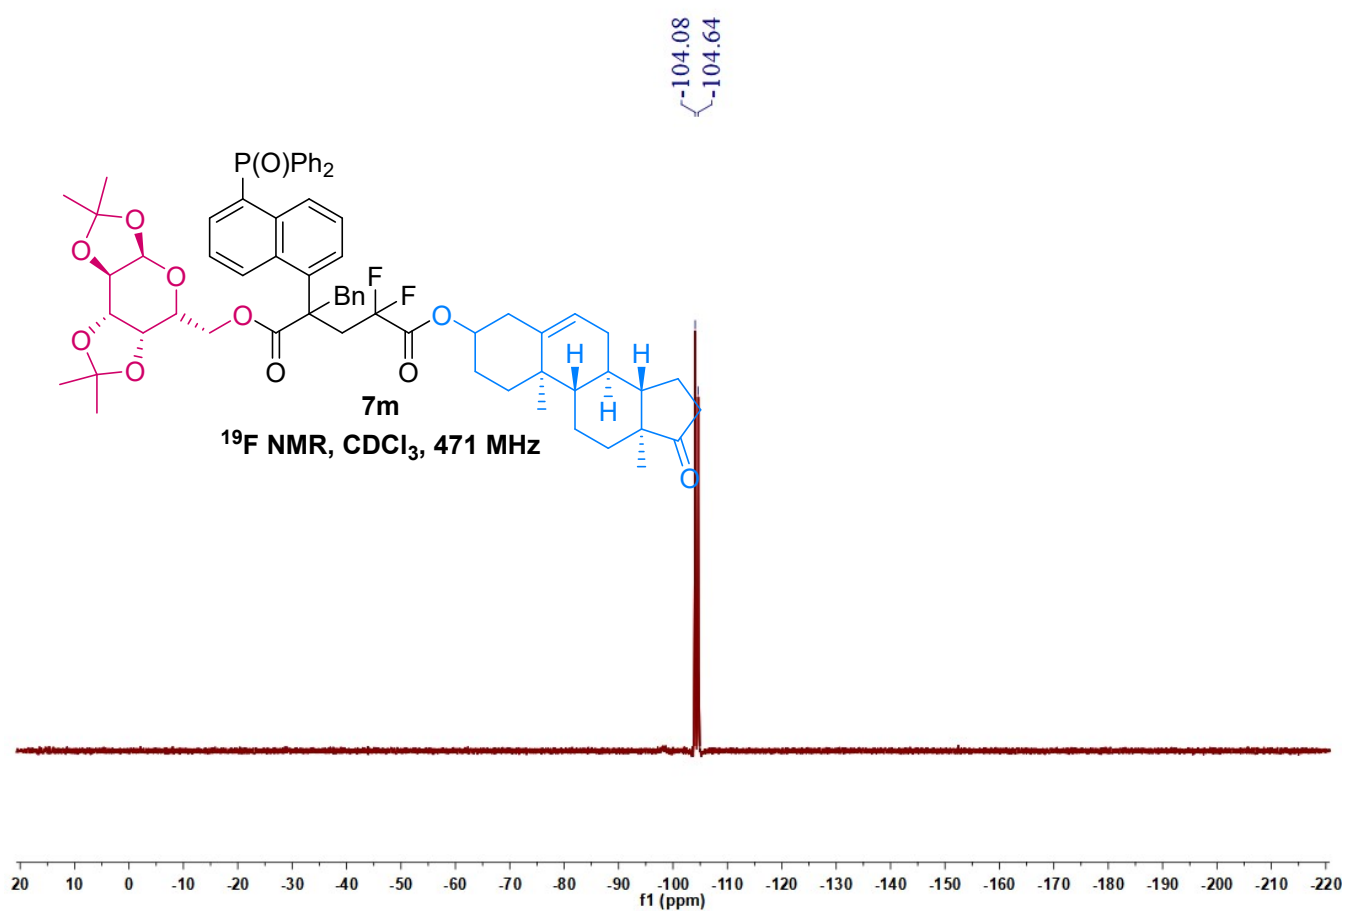

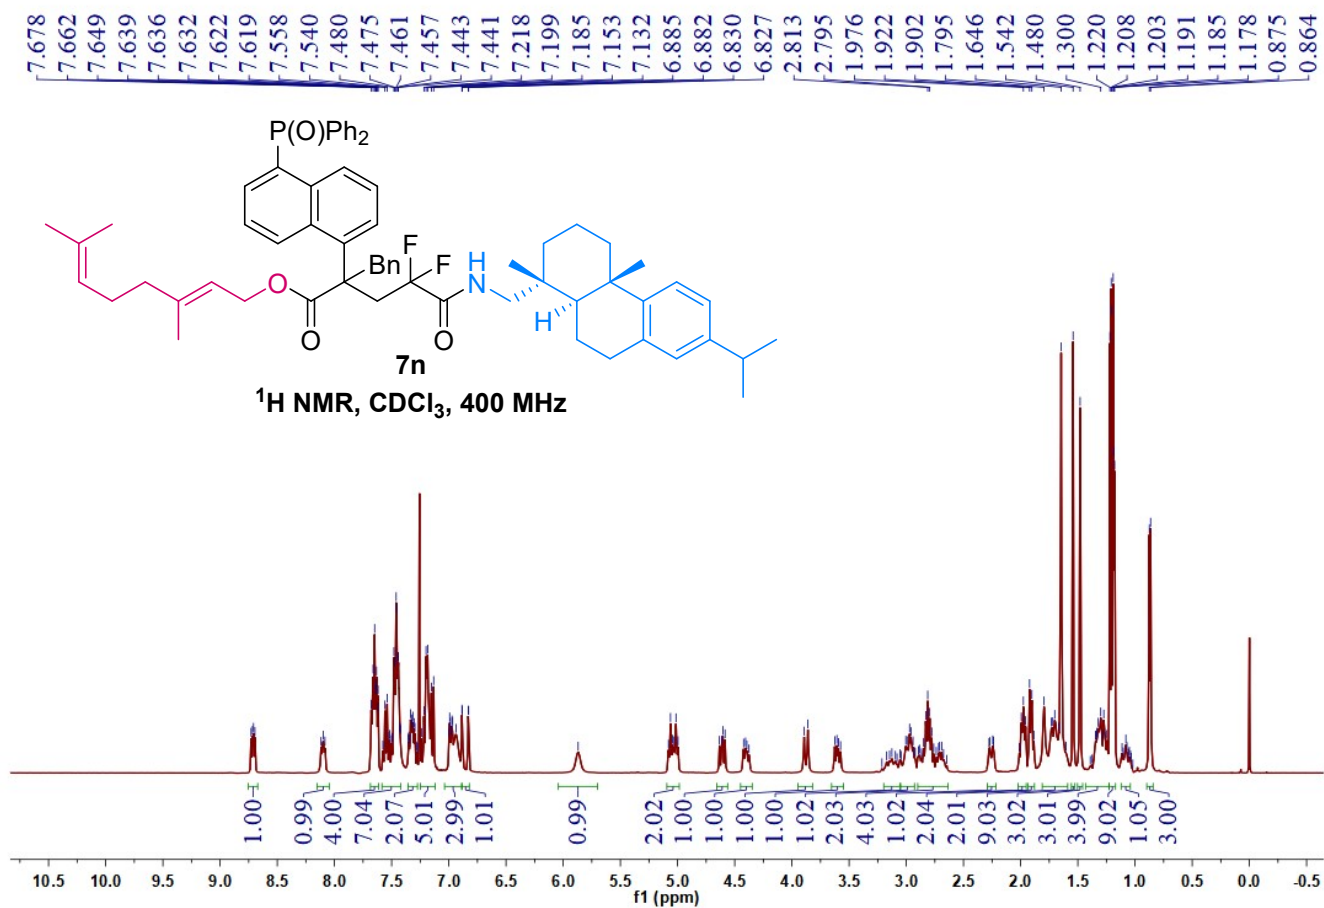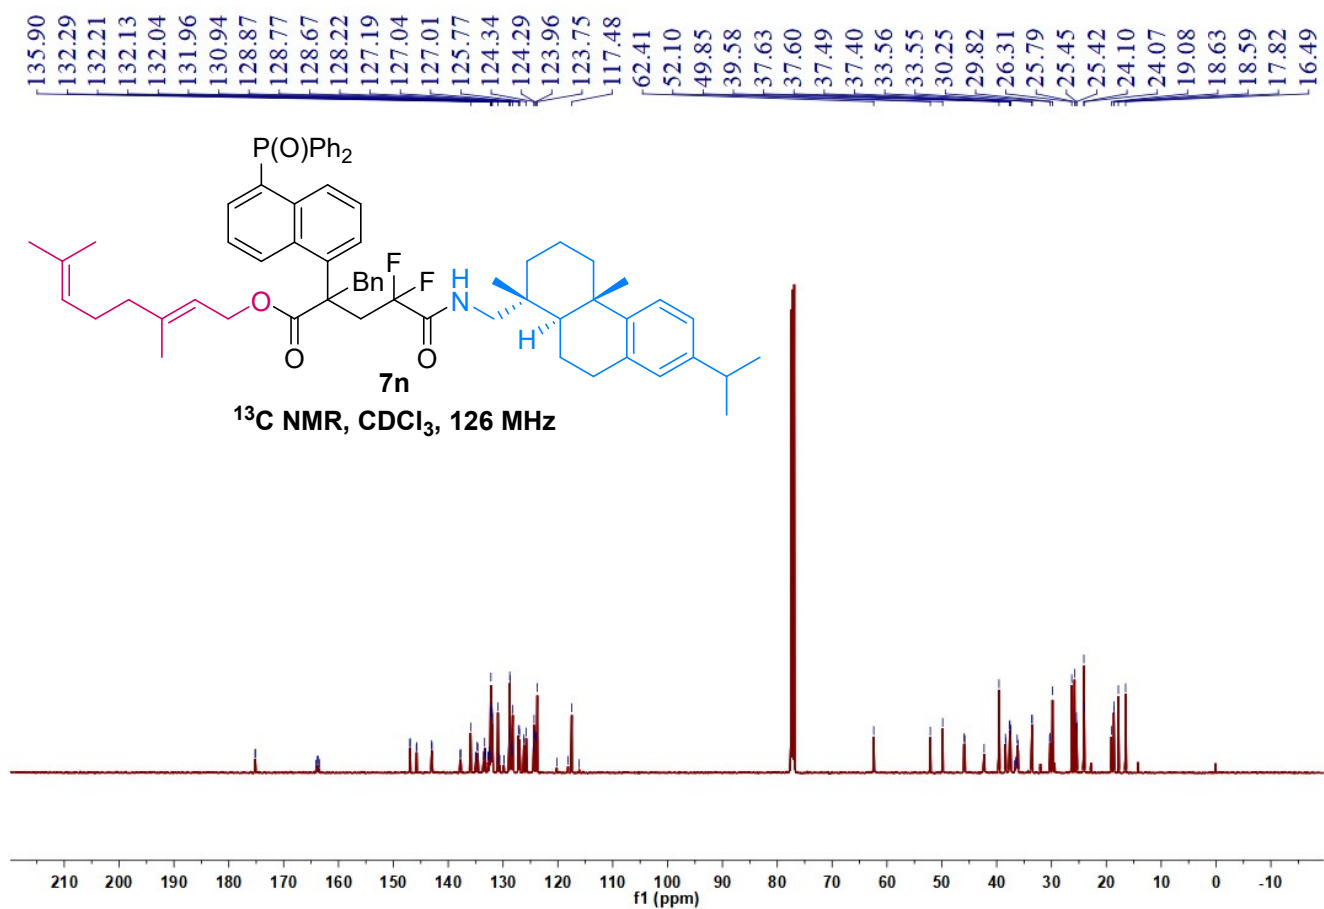

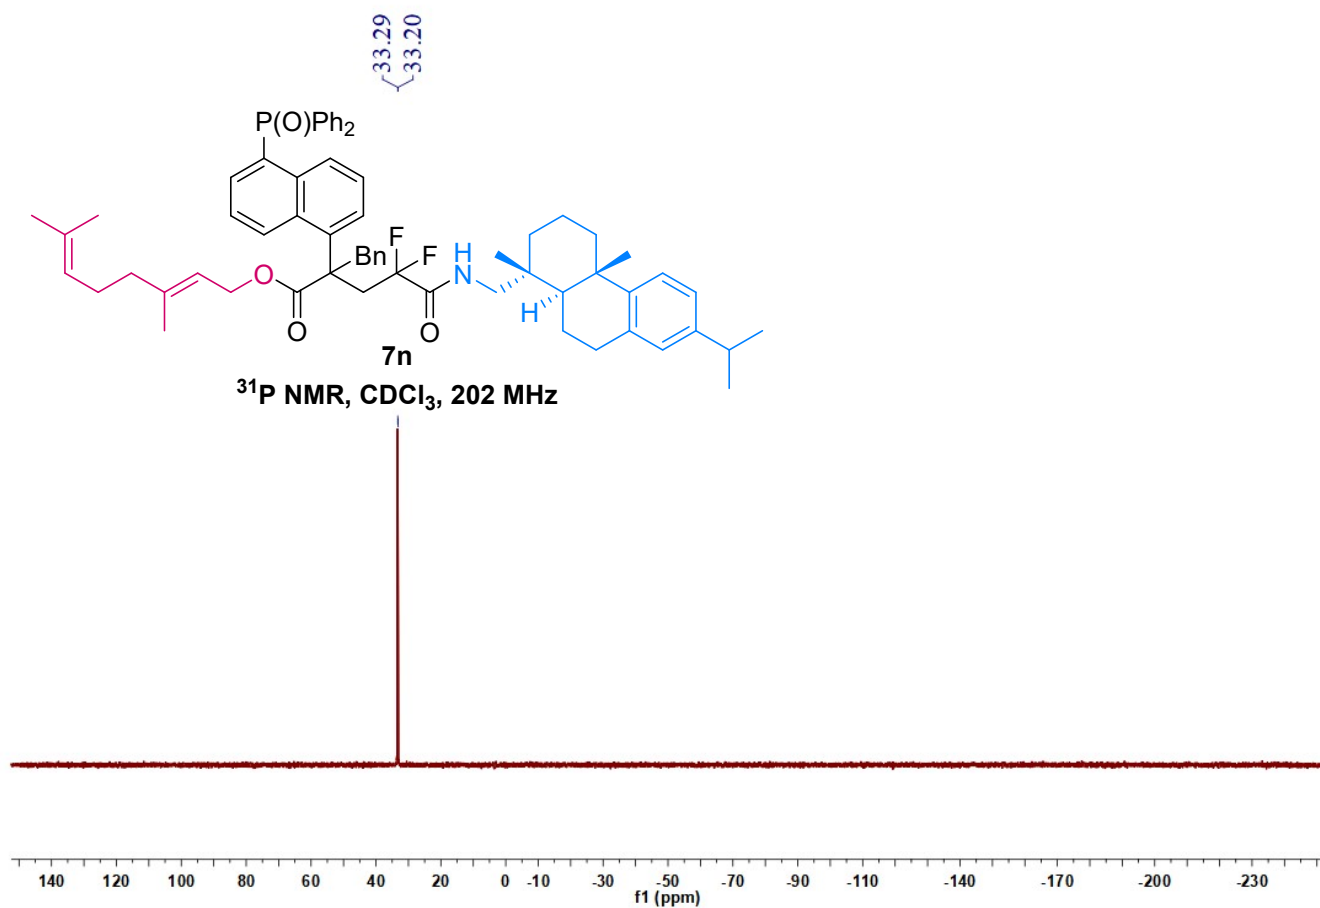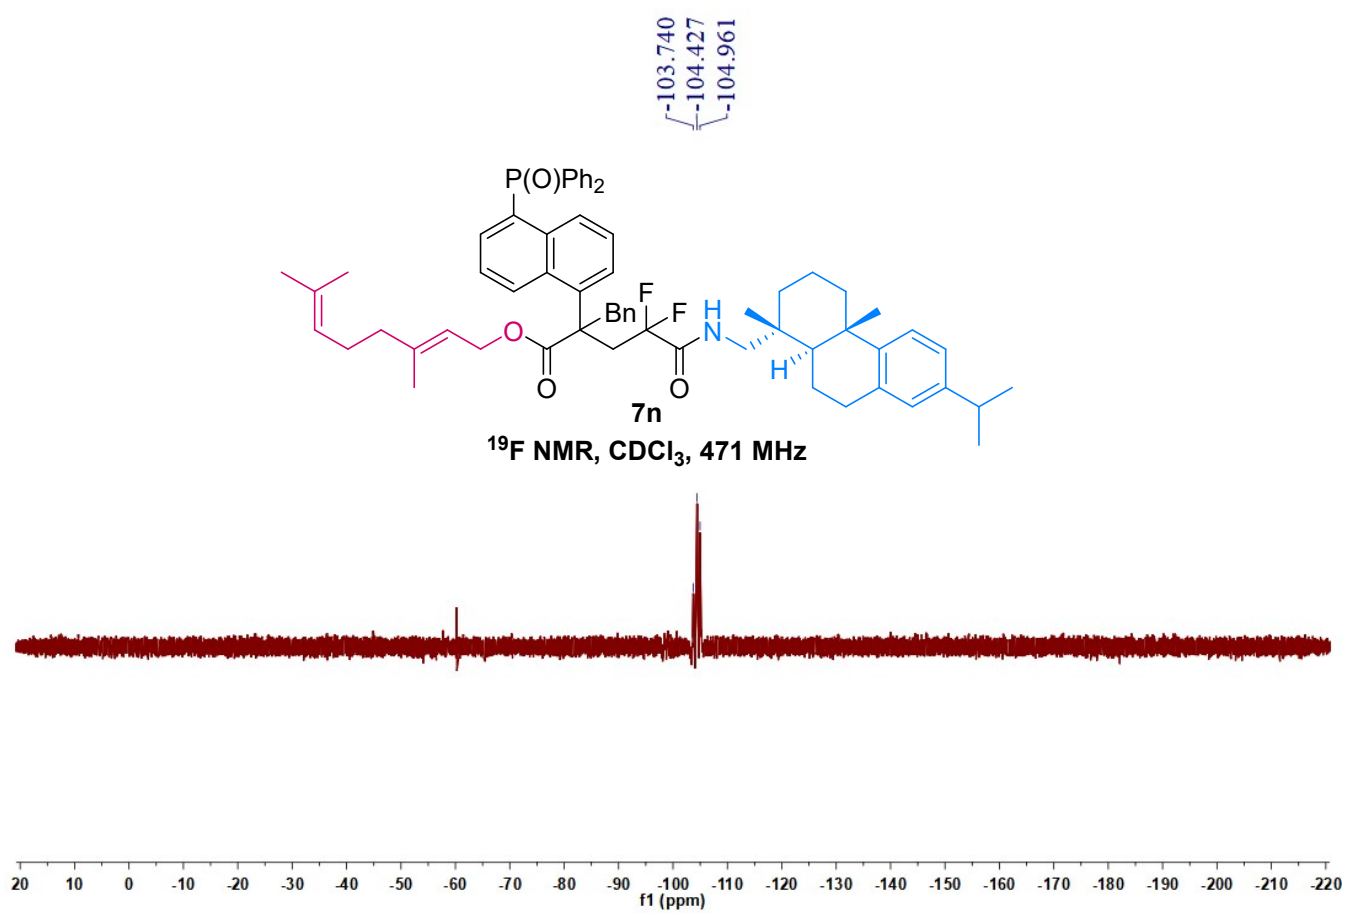



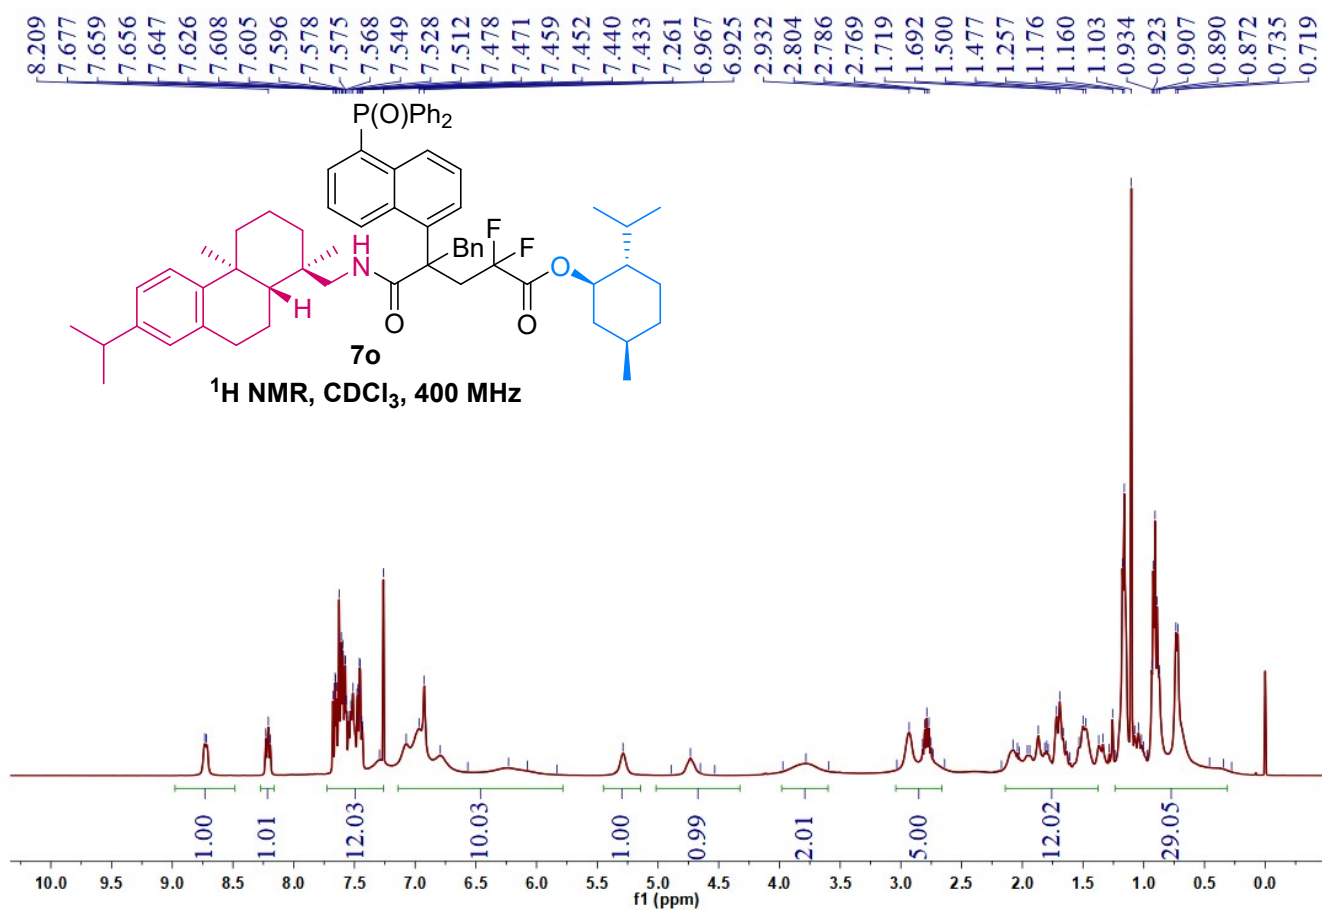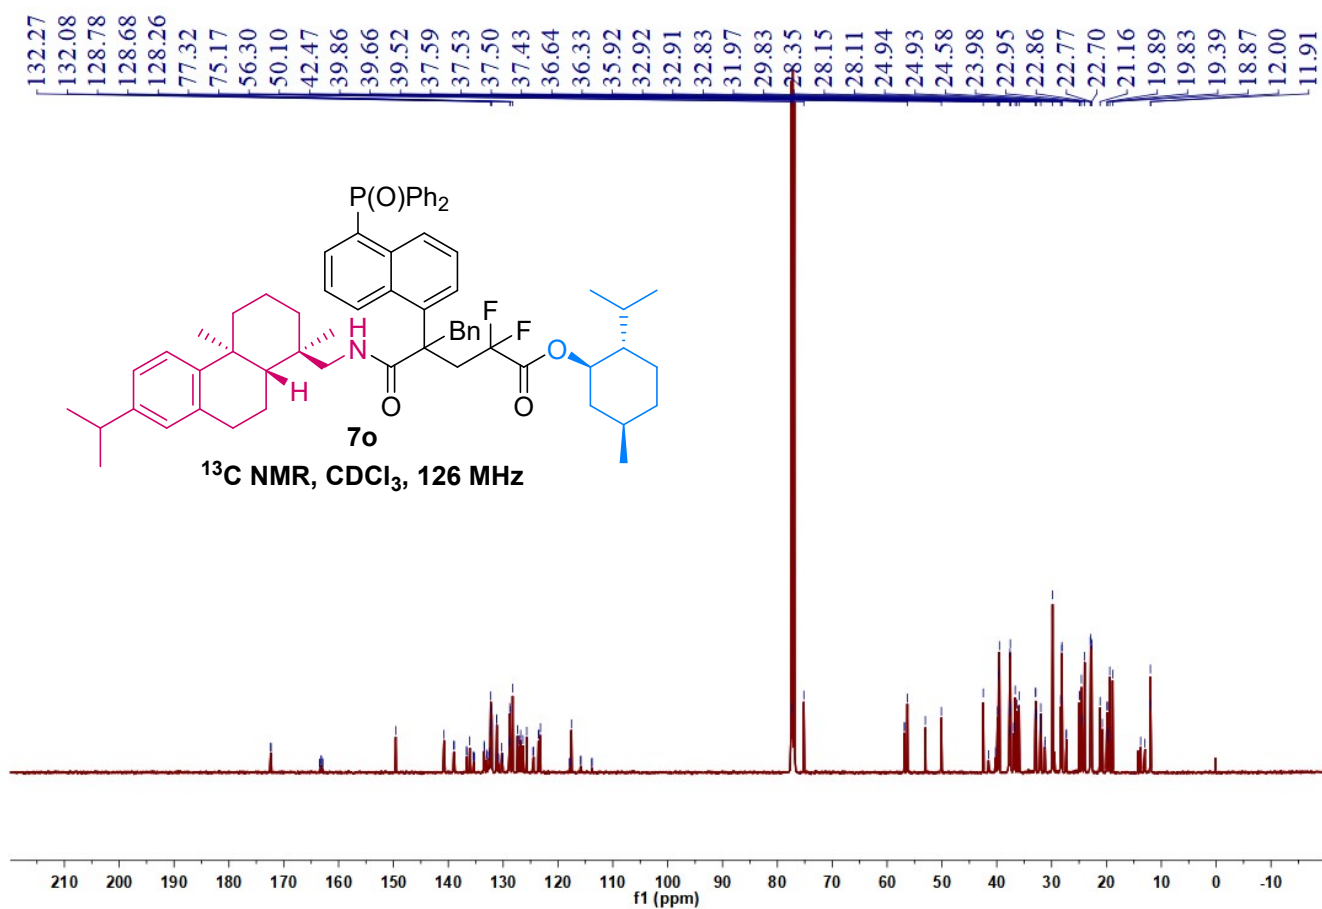

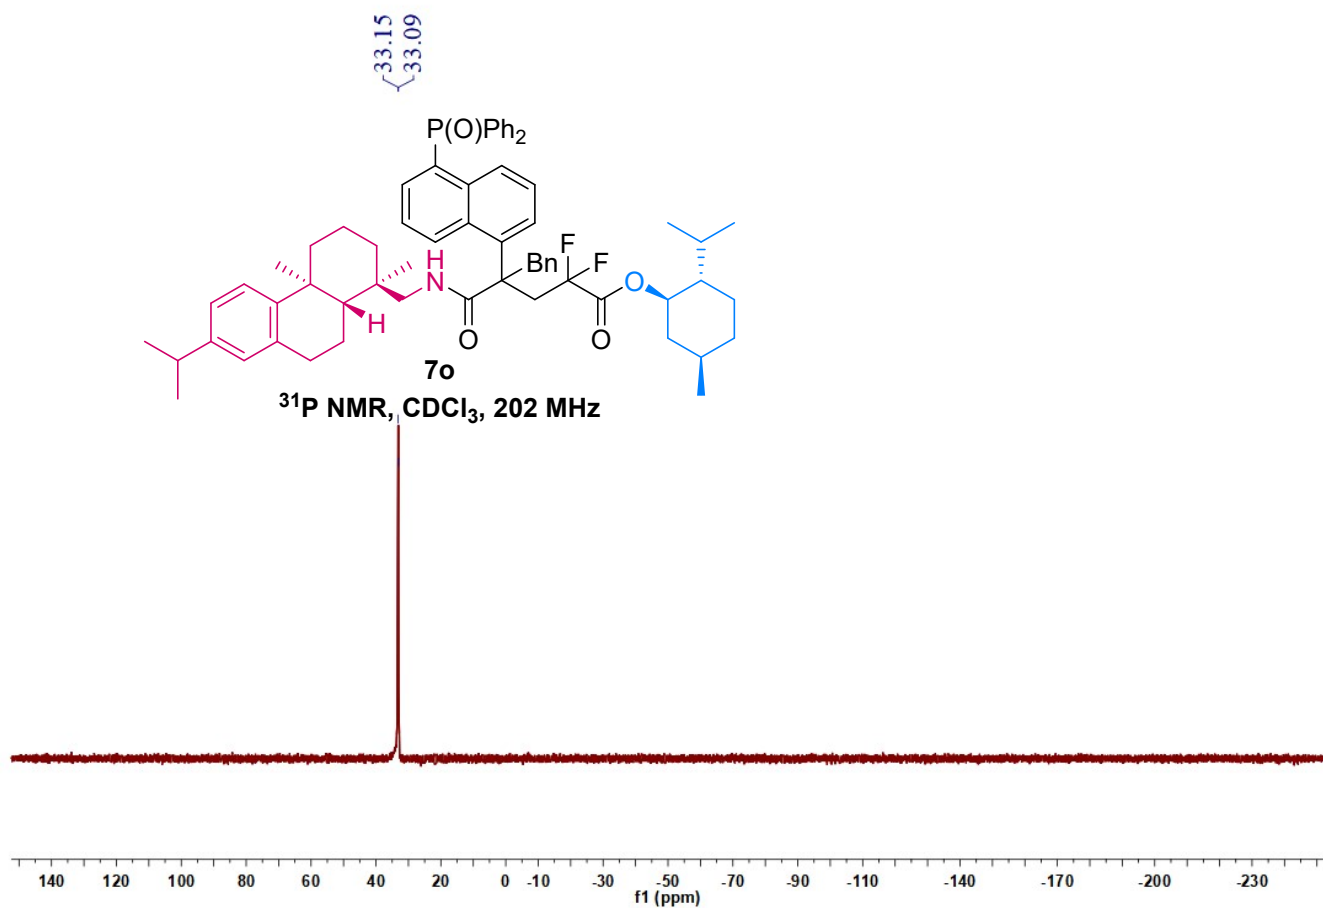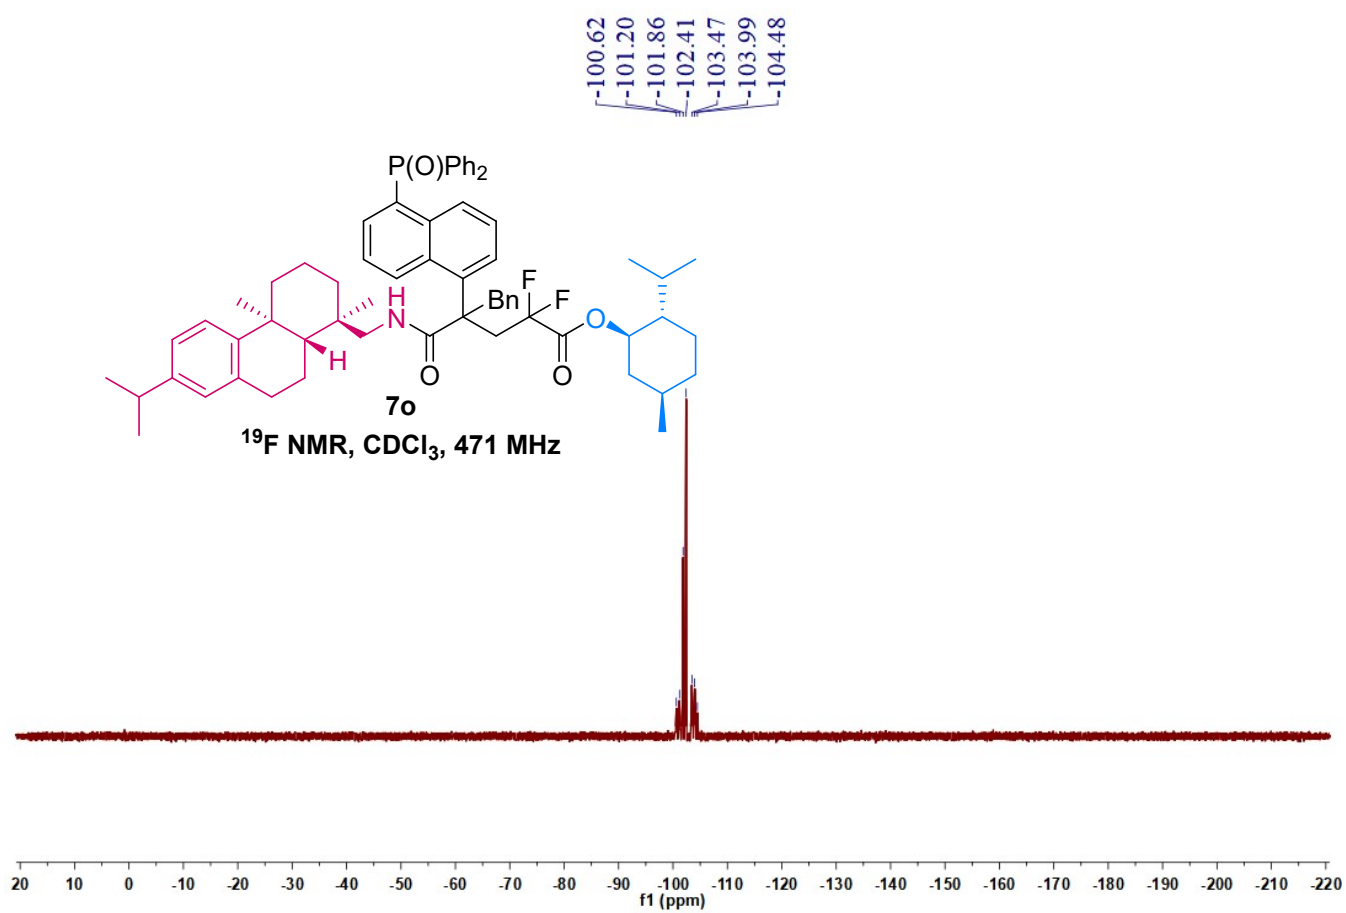

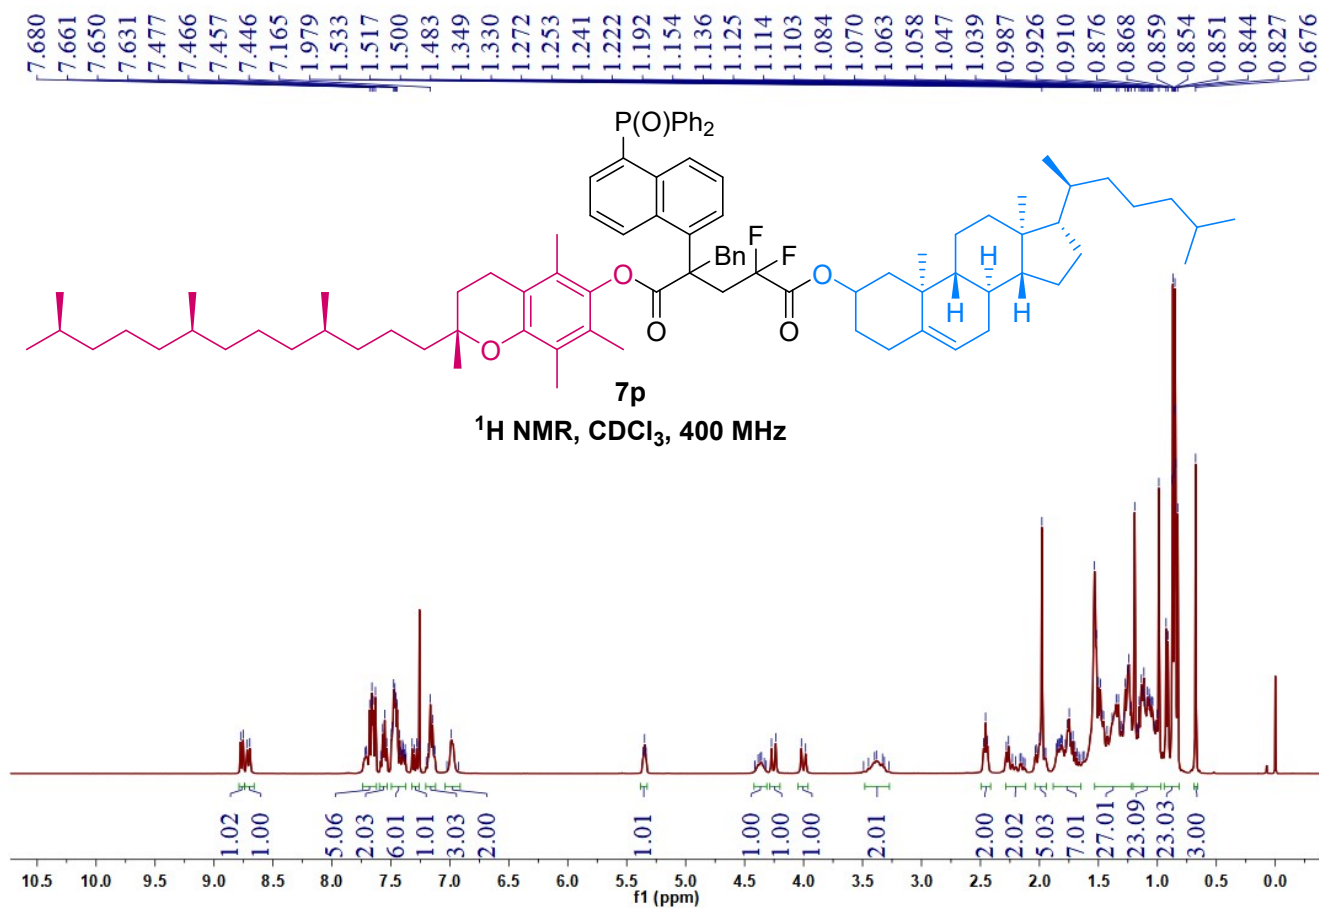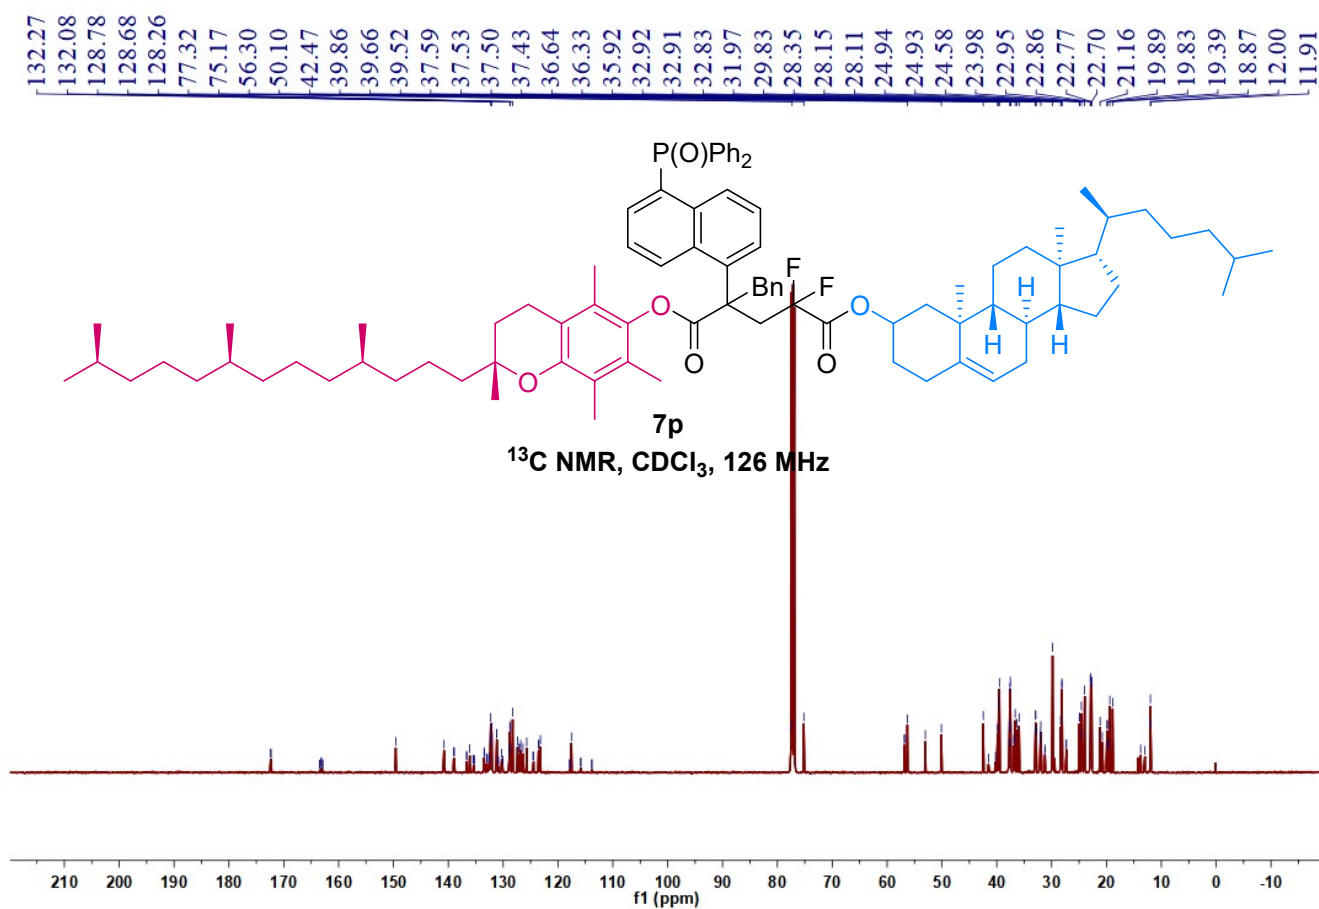

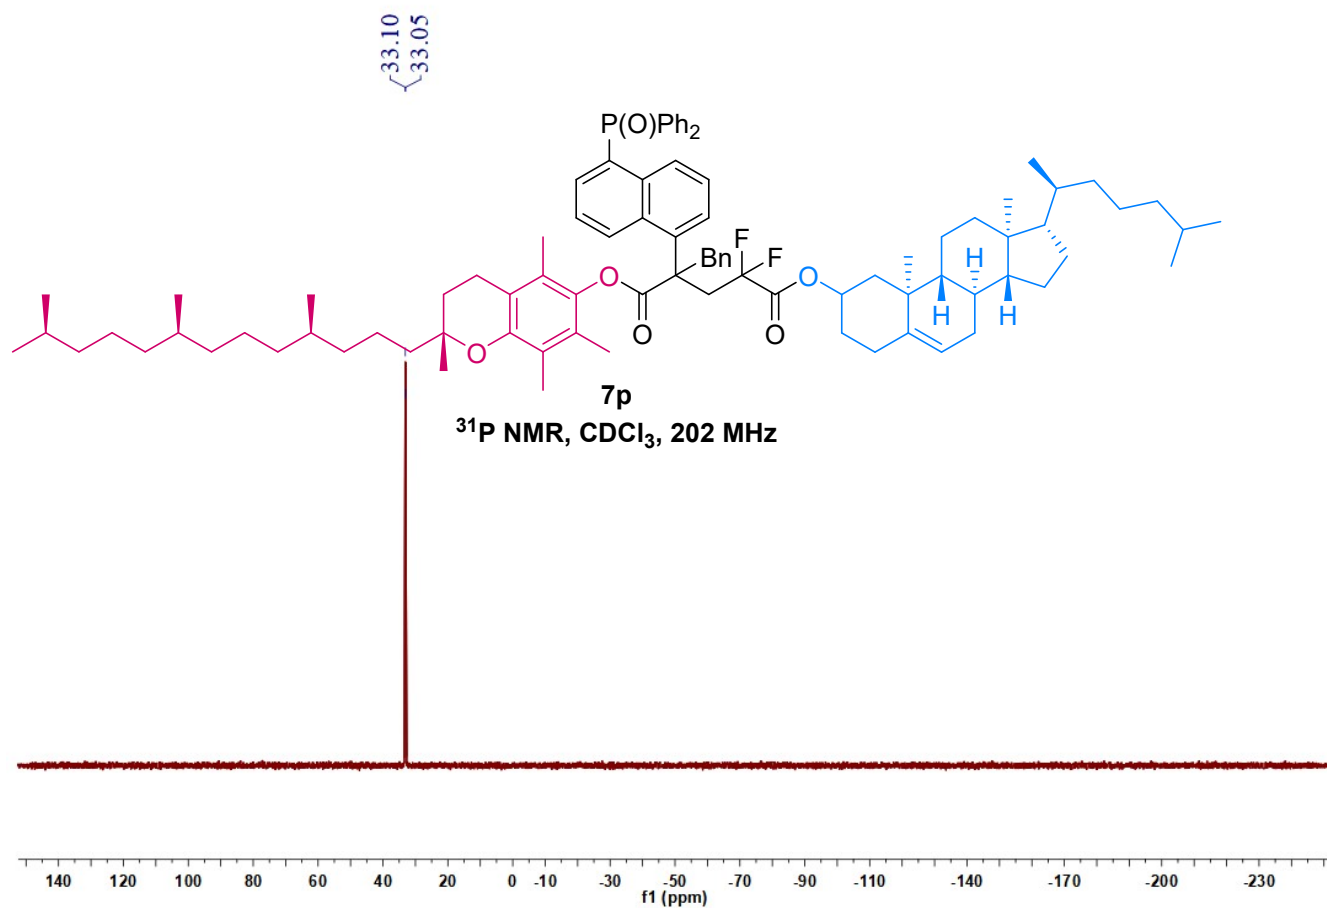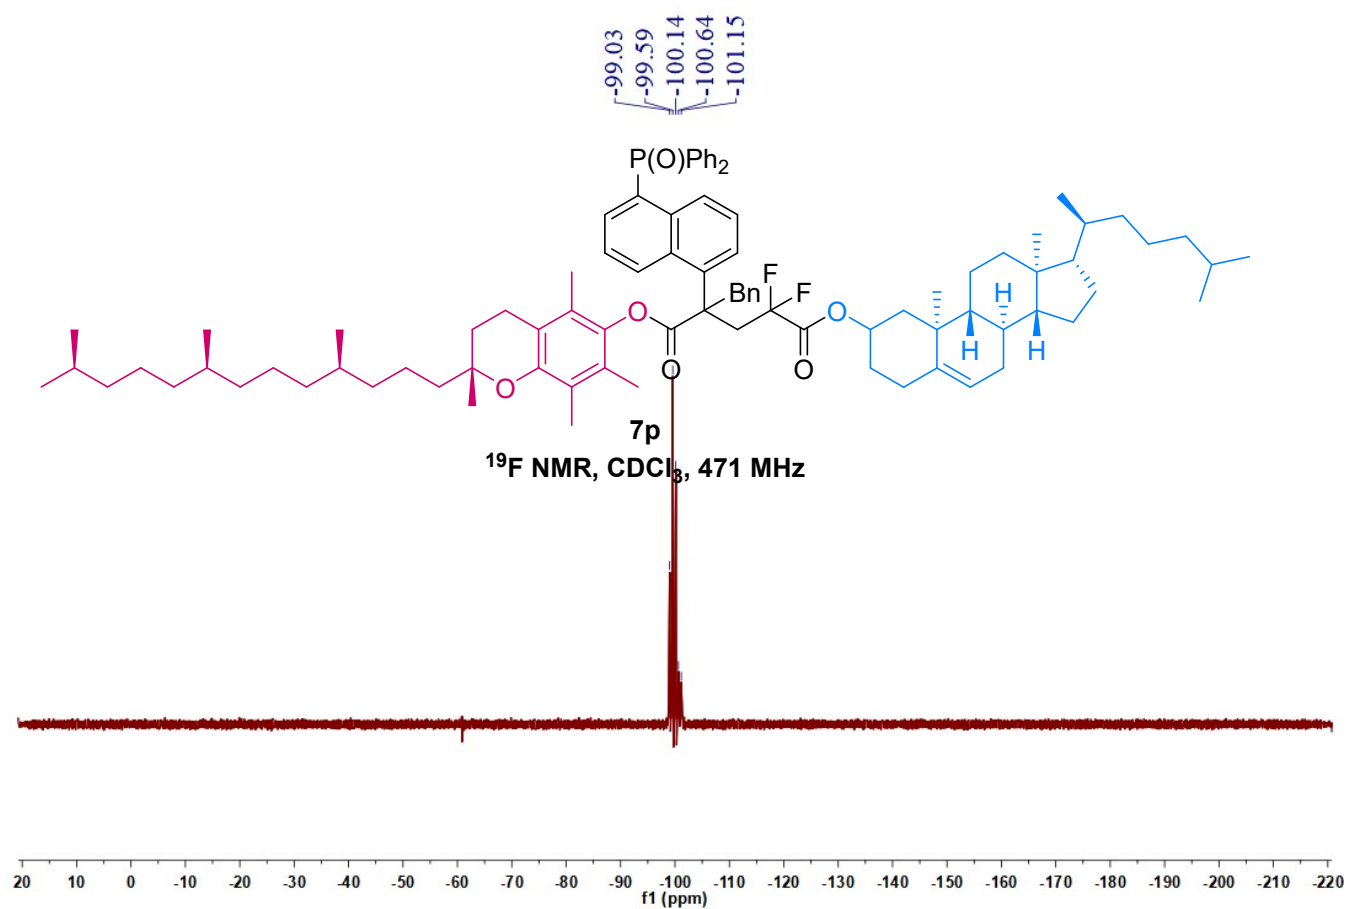

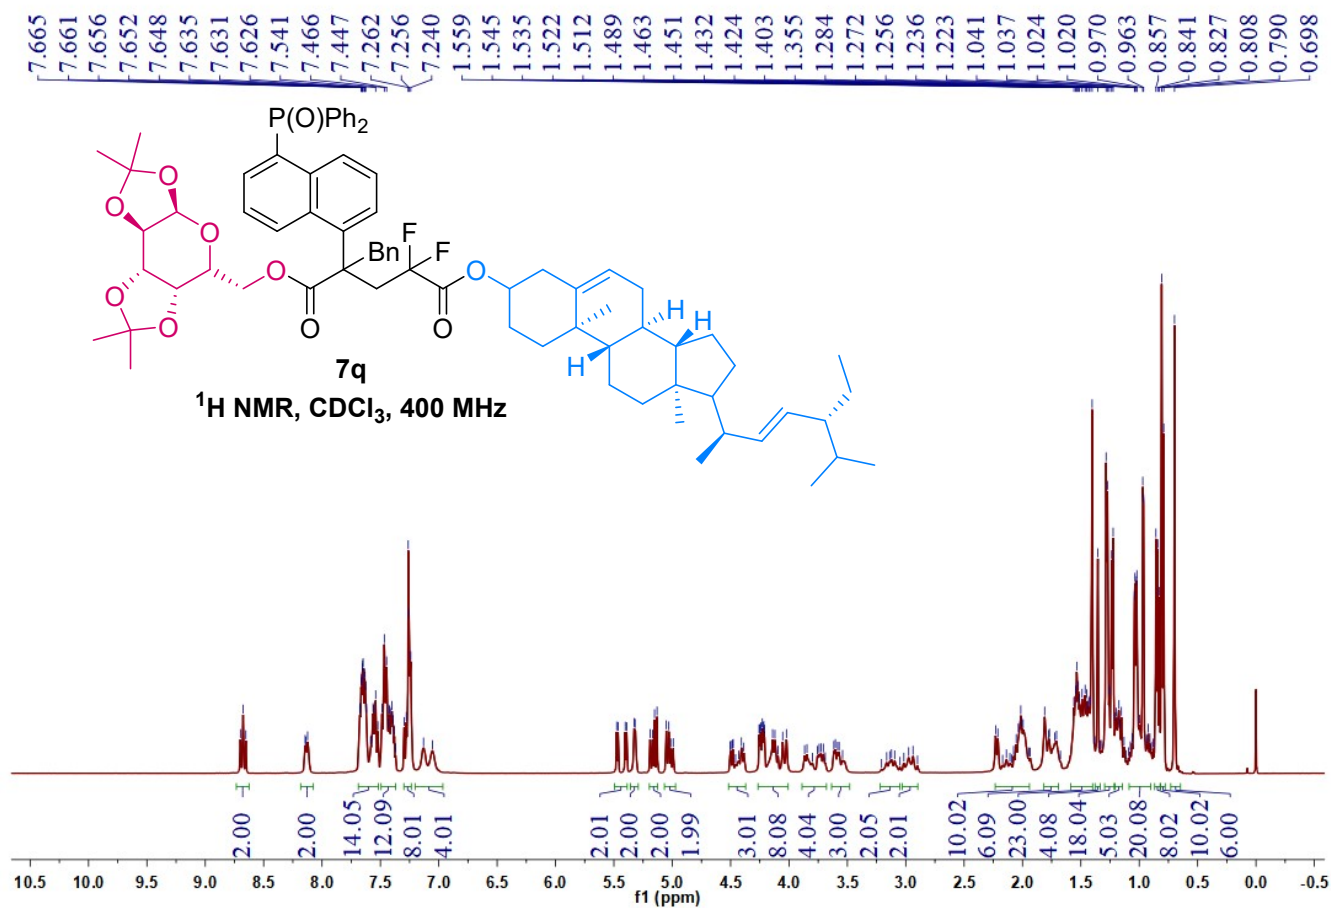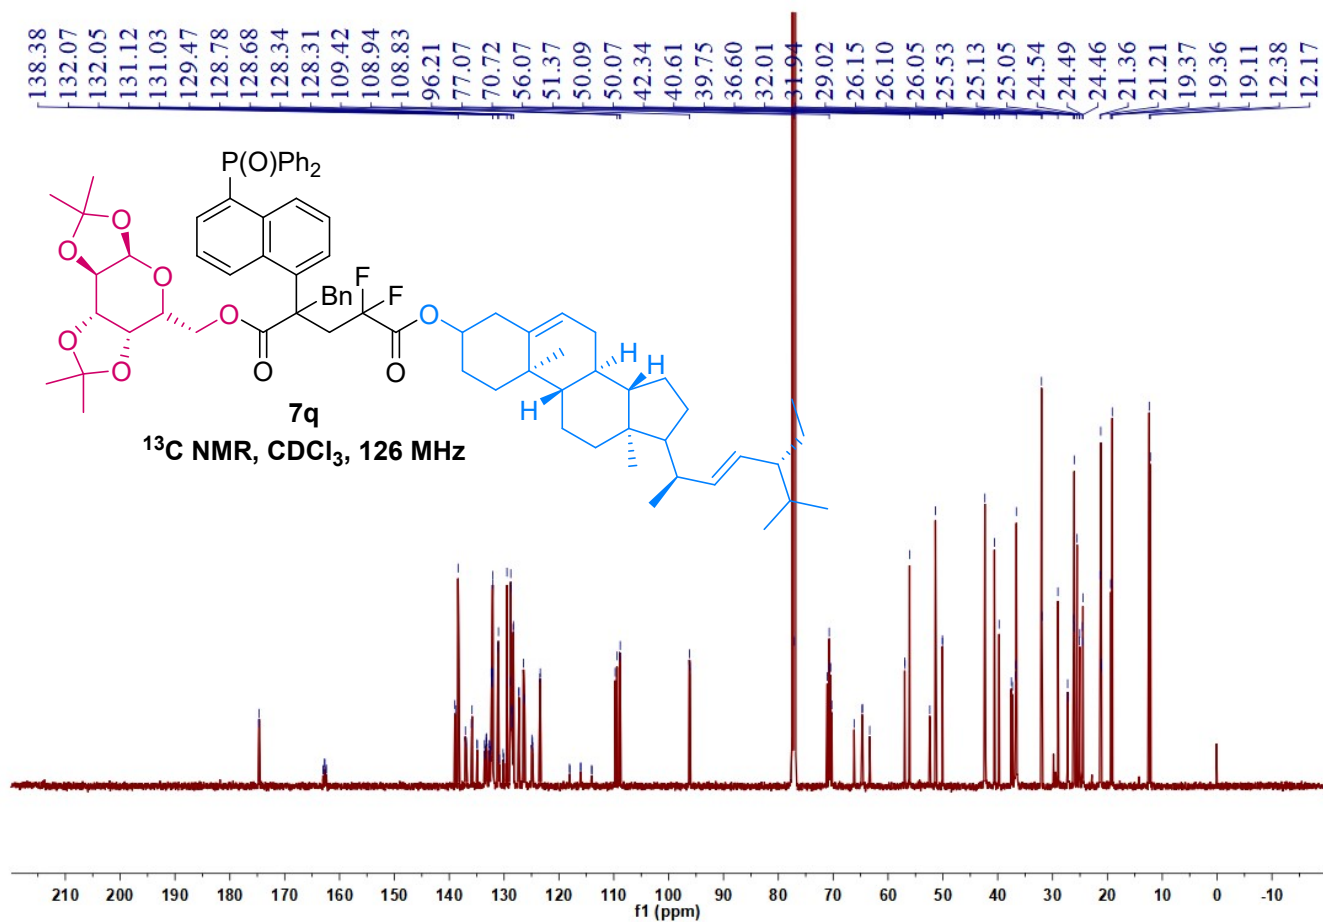

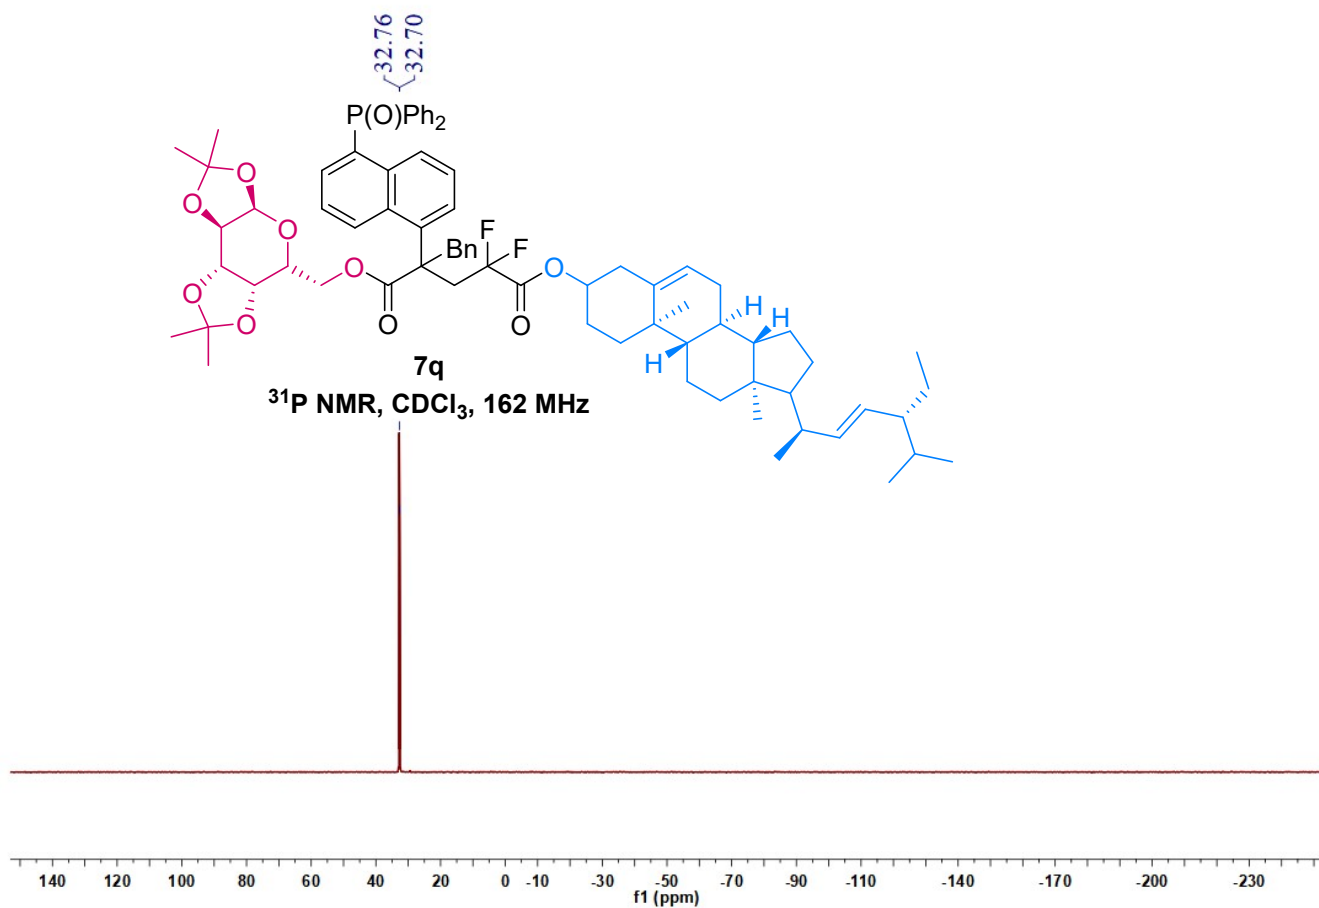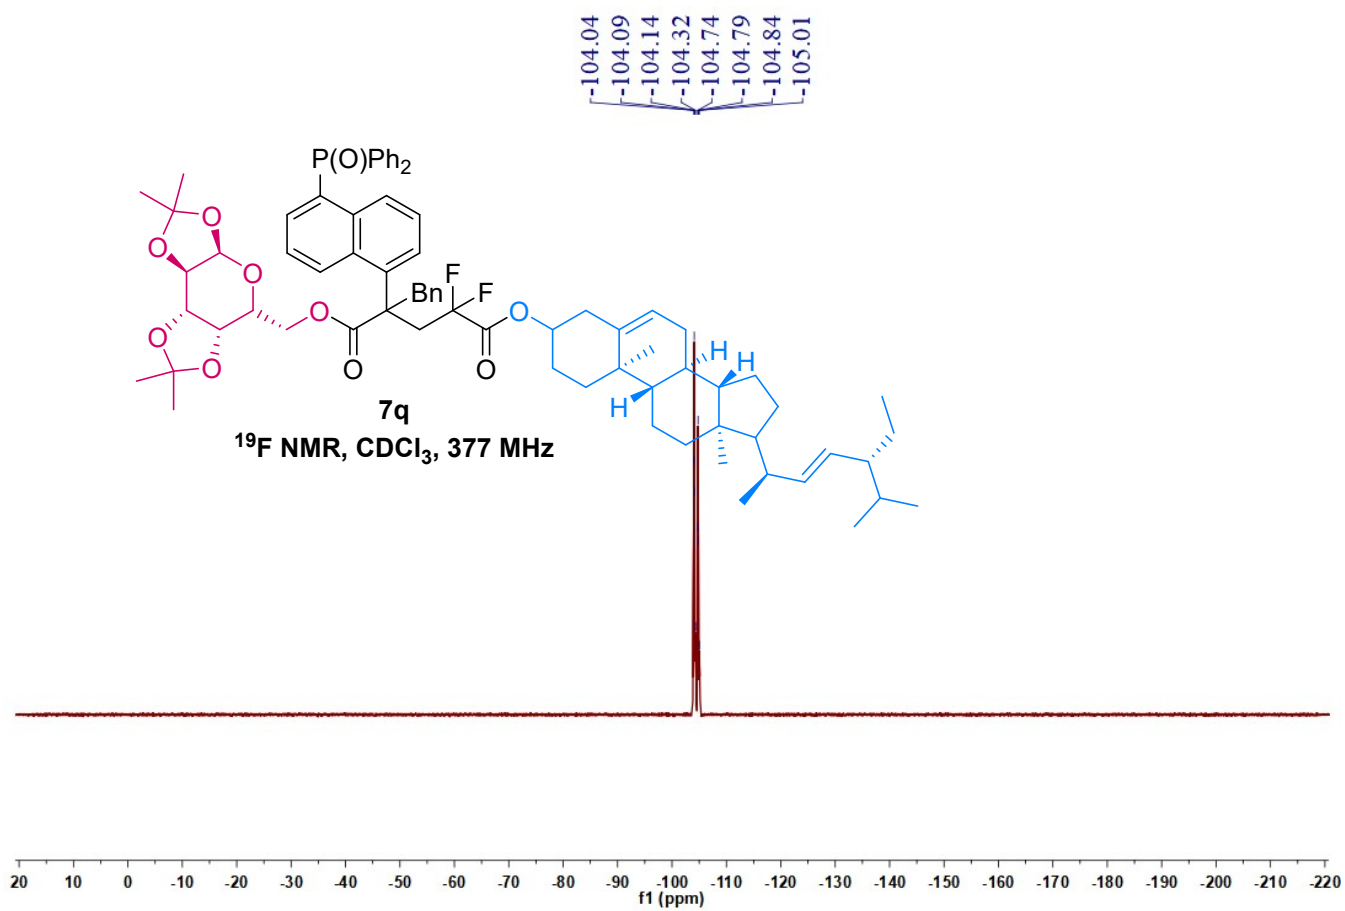



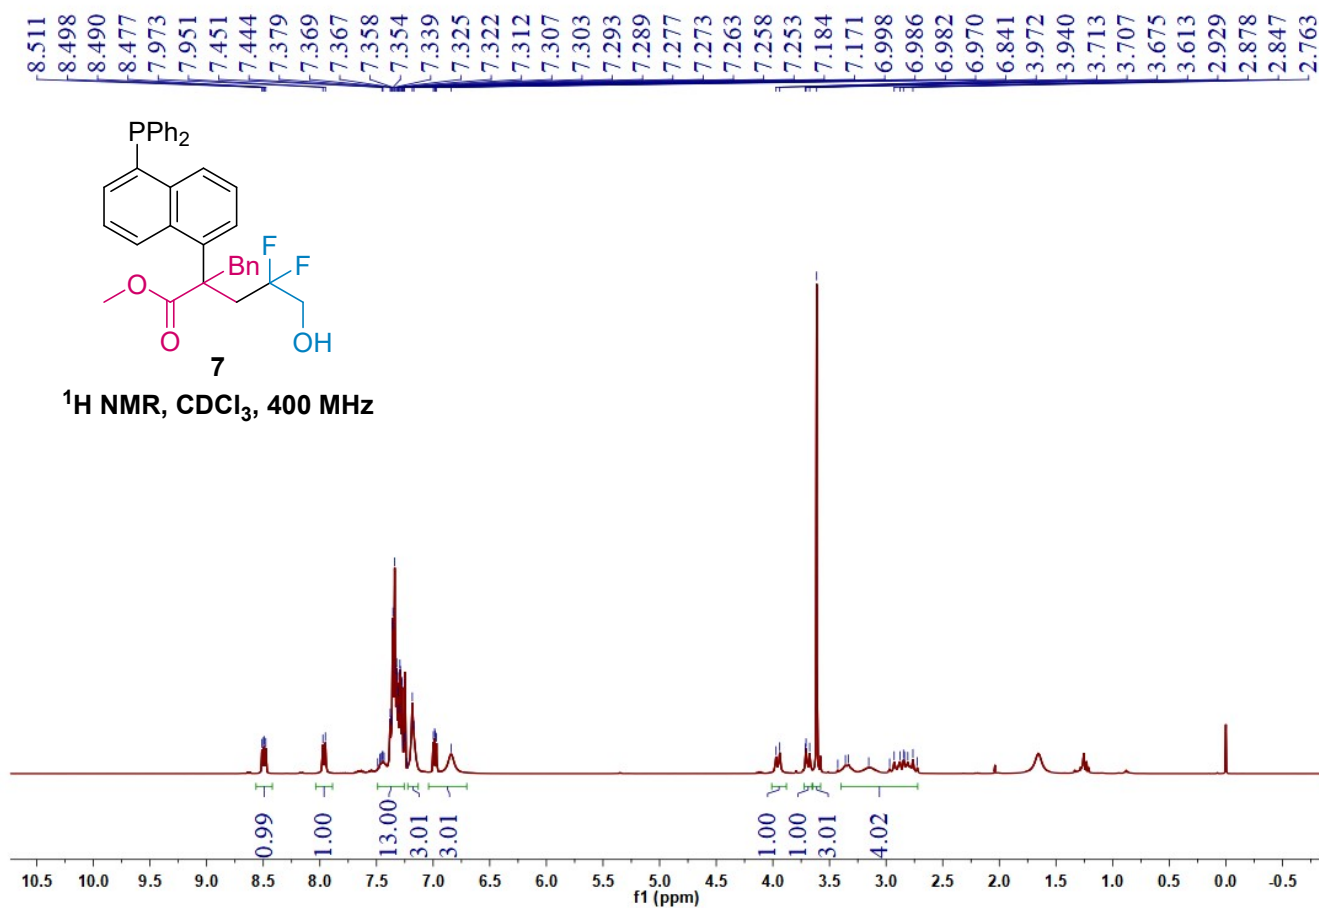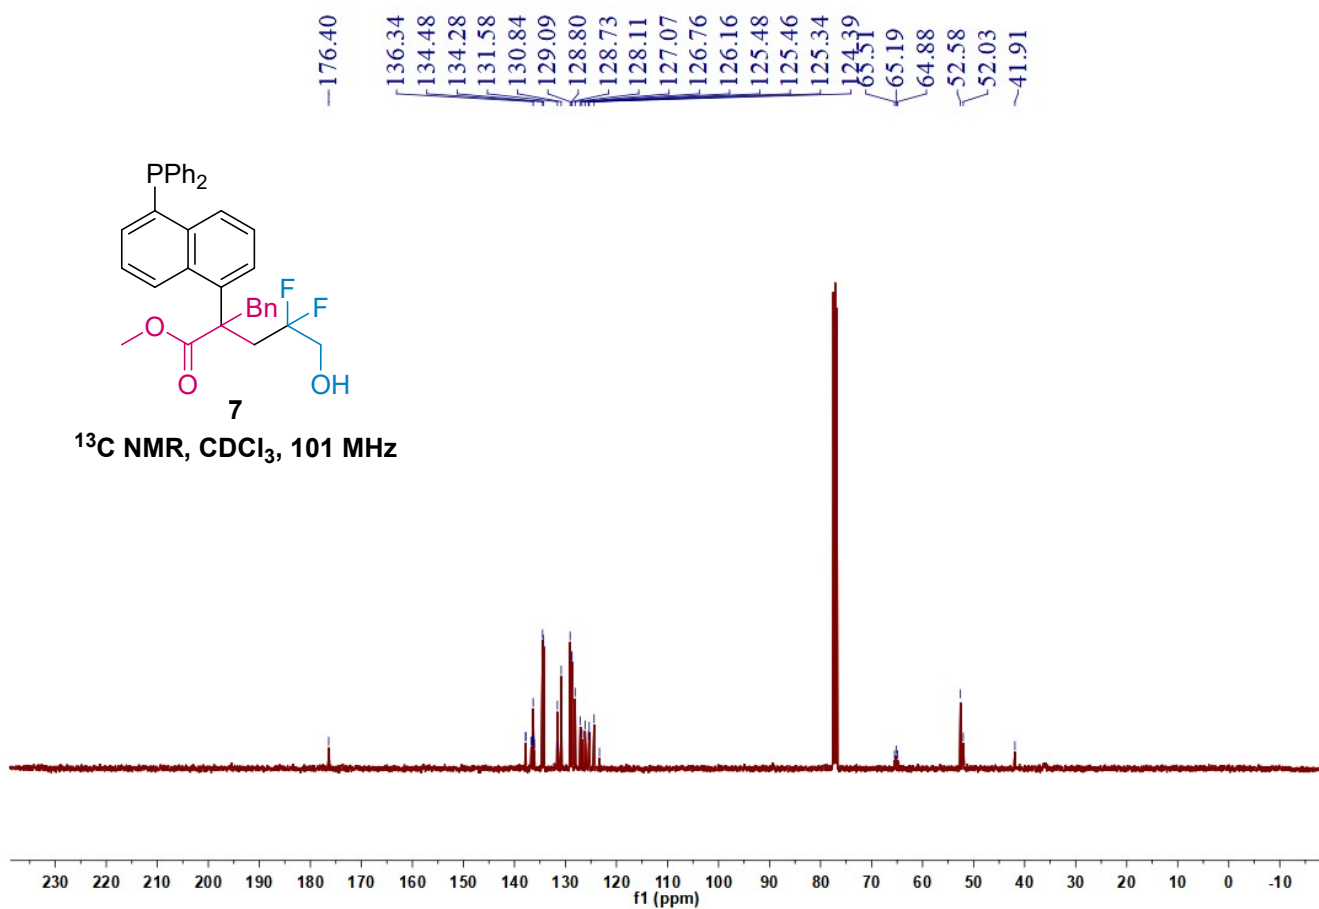



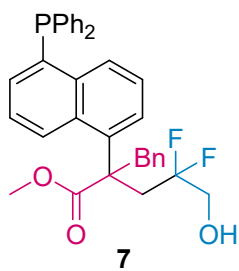

$^{31}\text{P}$  NMR,  $\text{CDCl}_3$ , 162 MHz

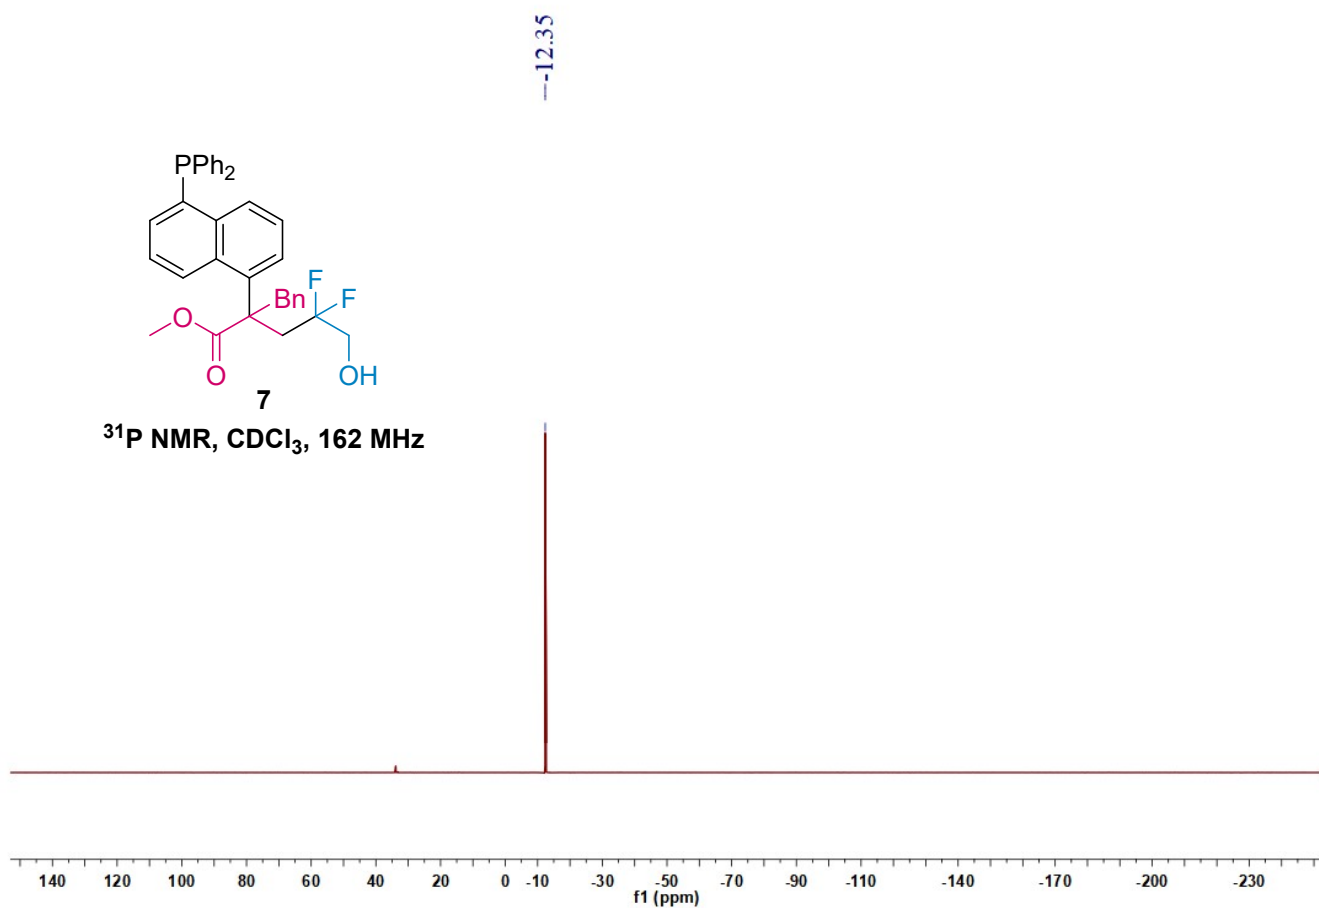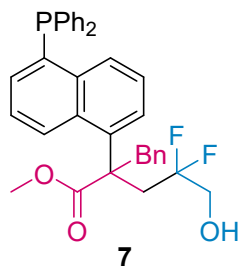

$^{19}\text{F}$  NMR,  $\text{CDCl}_3$ , 377 MHz

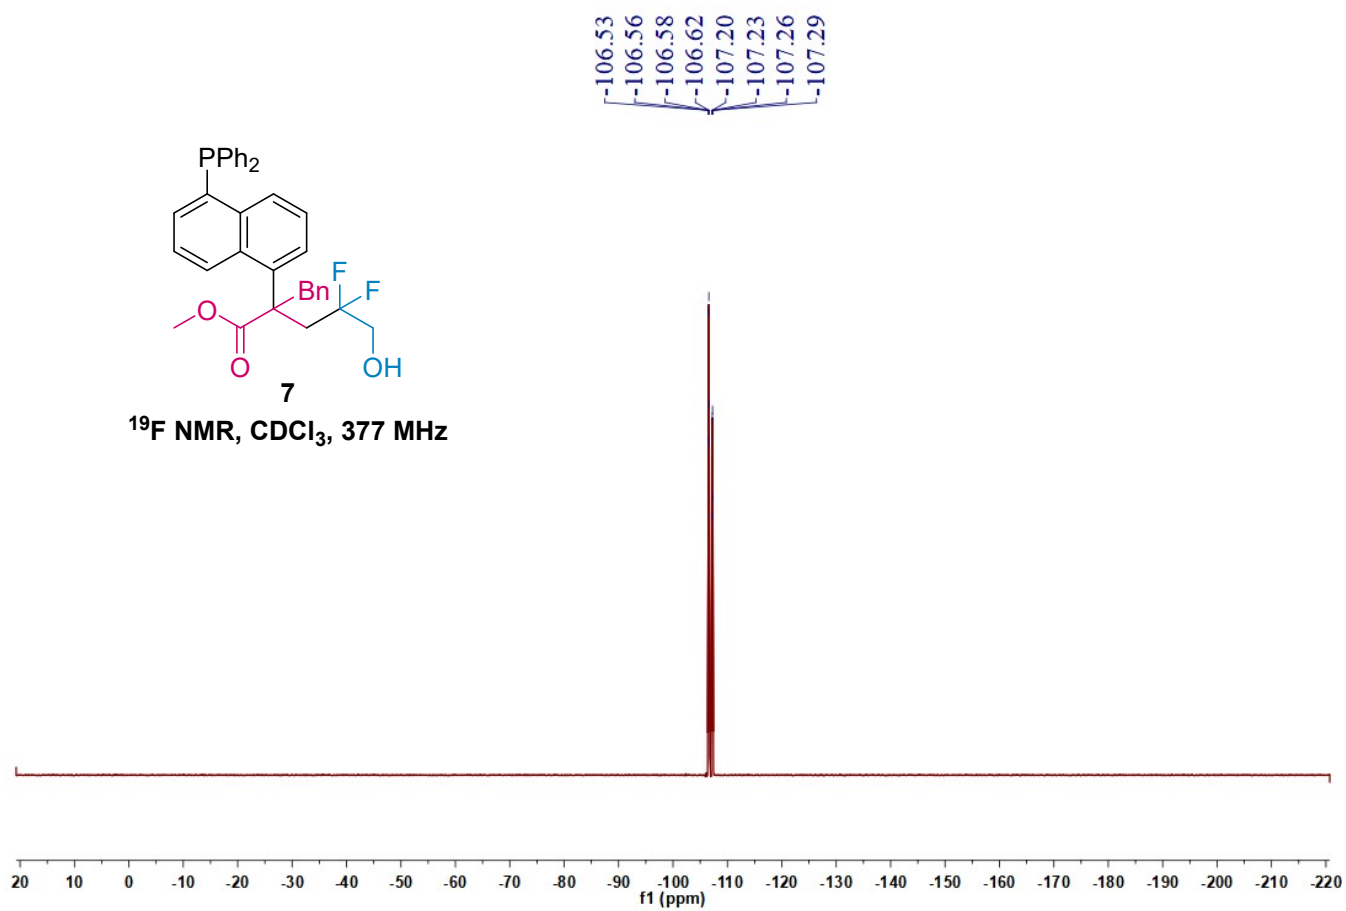

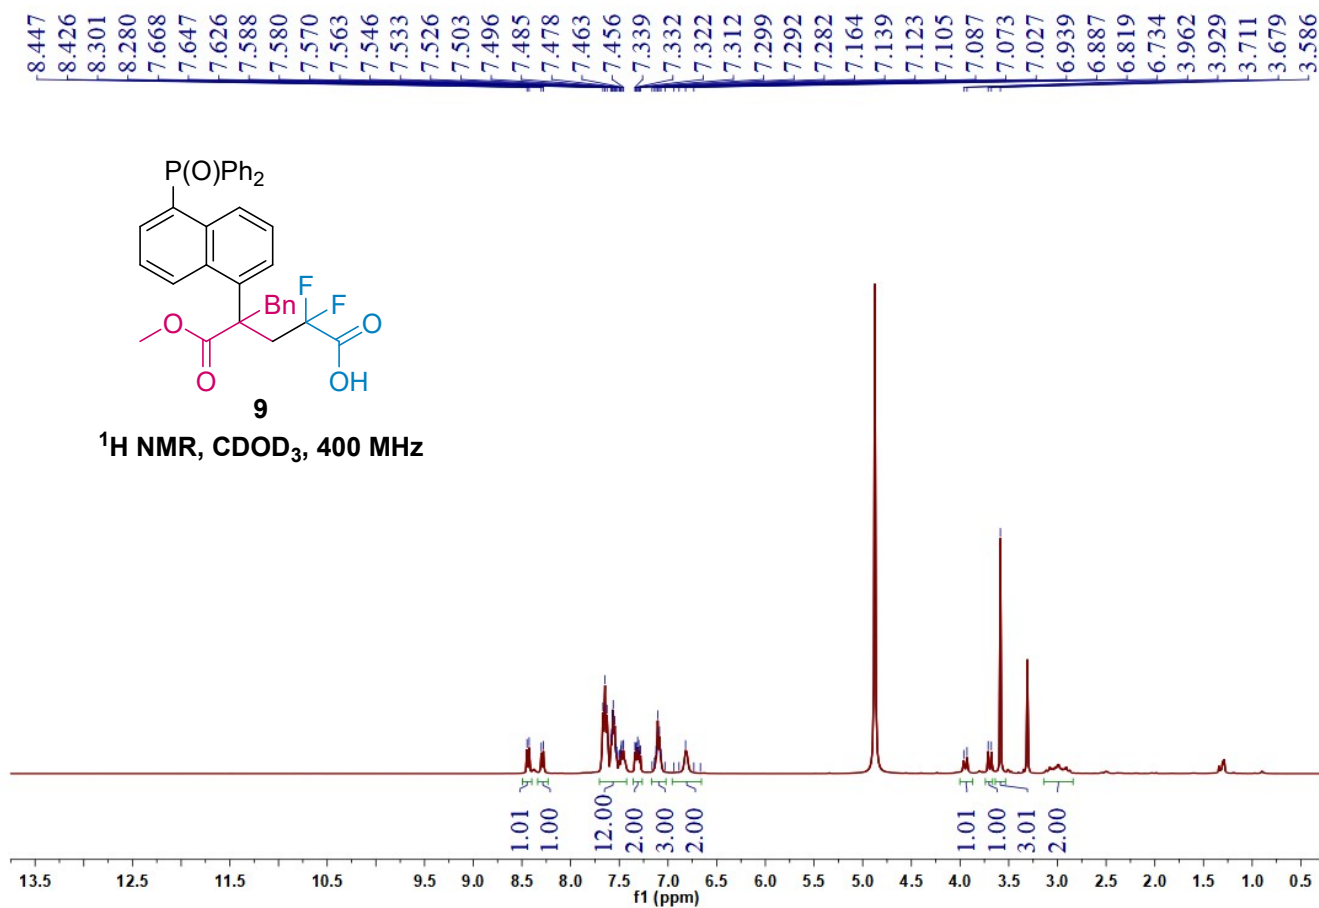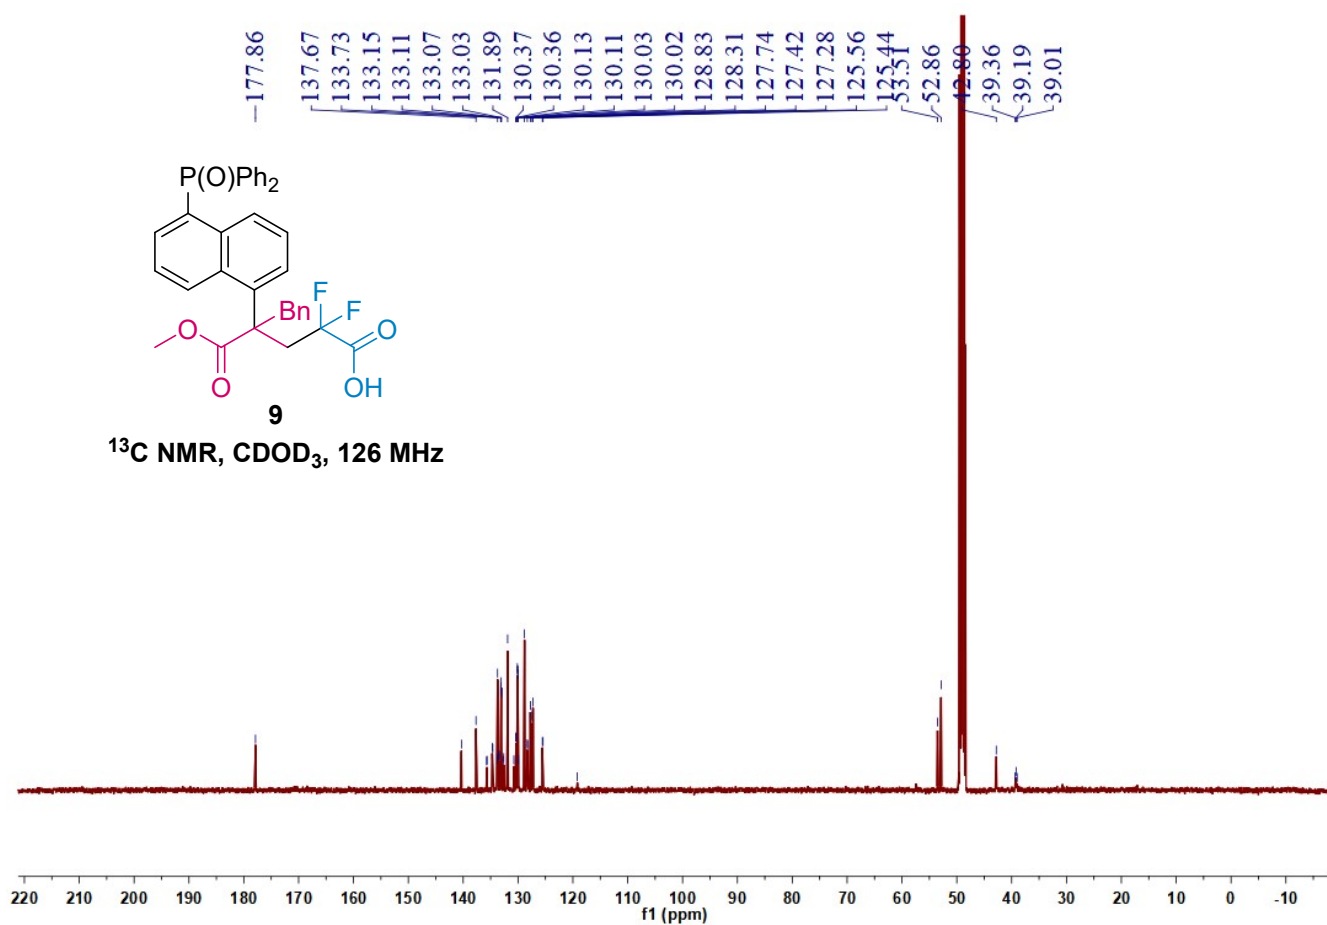

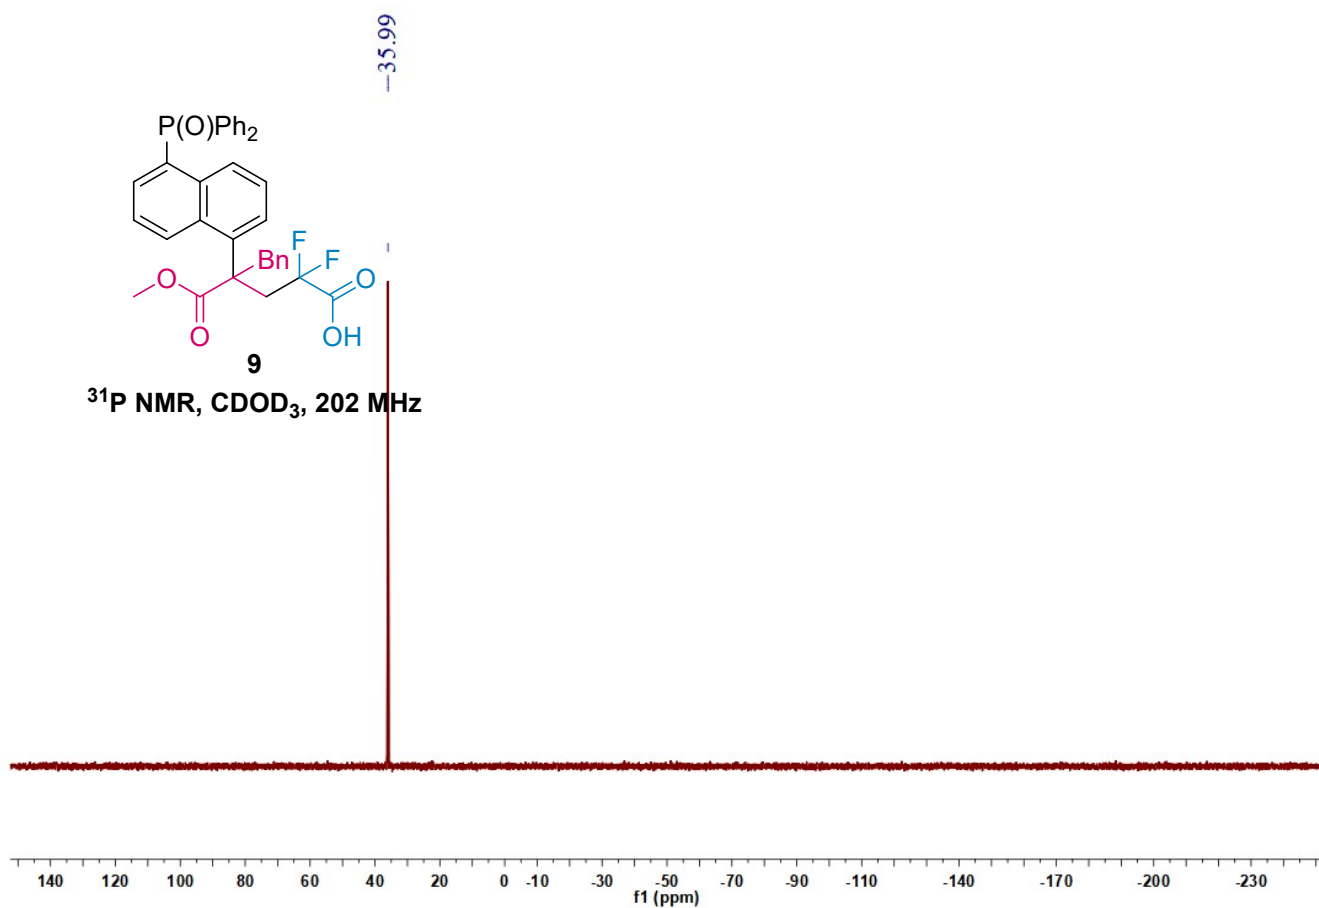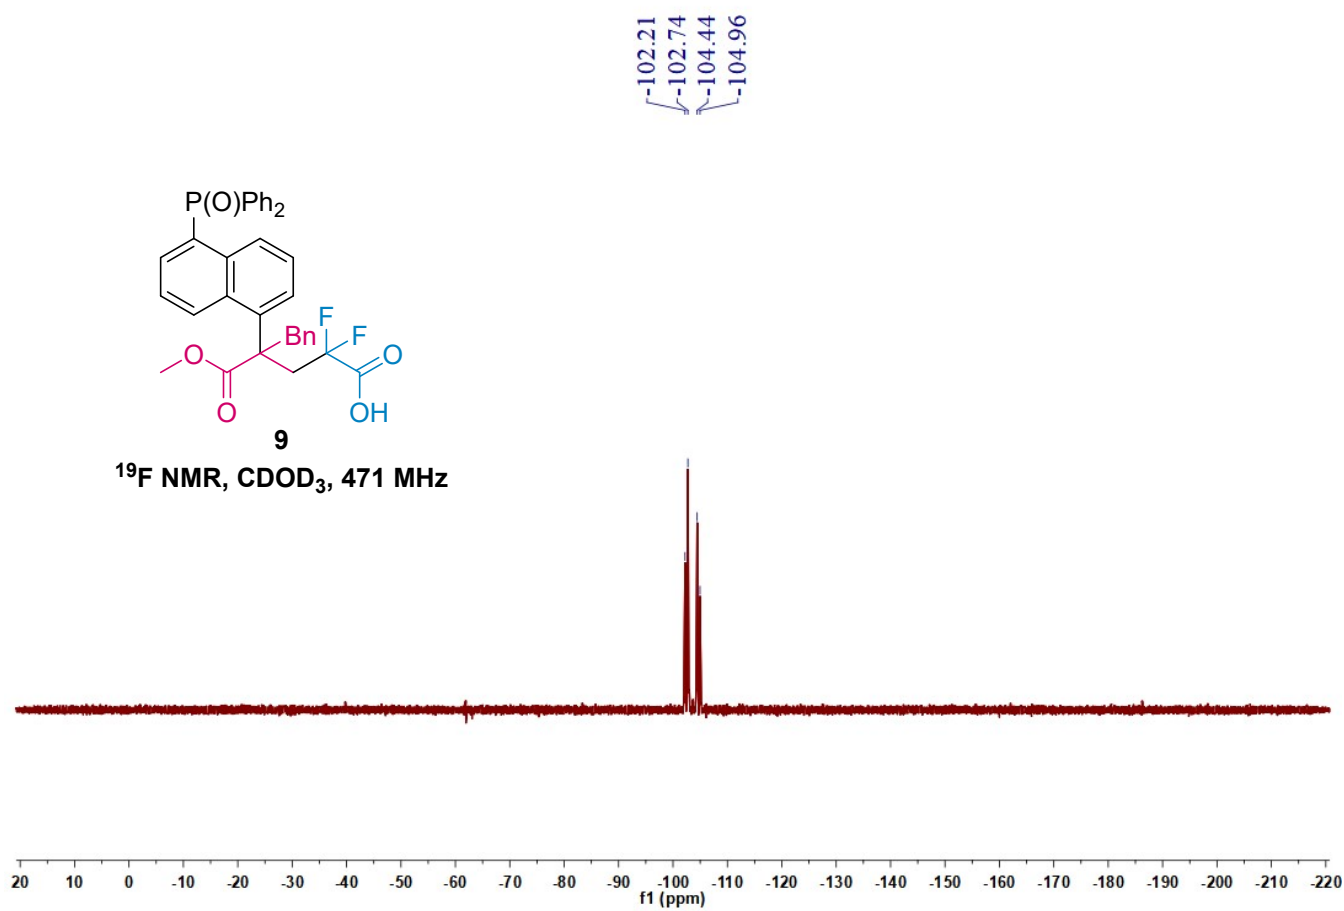

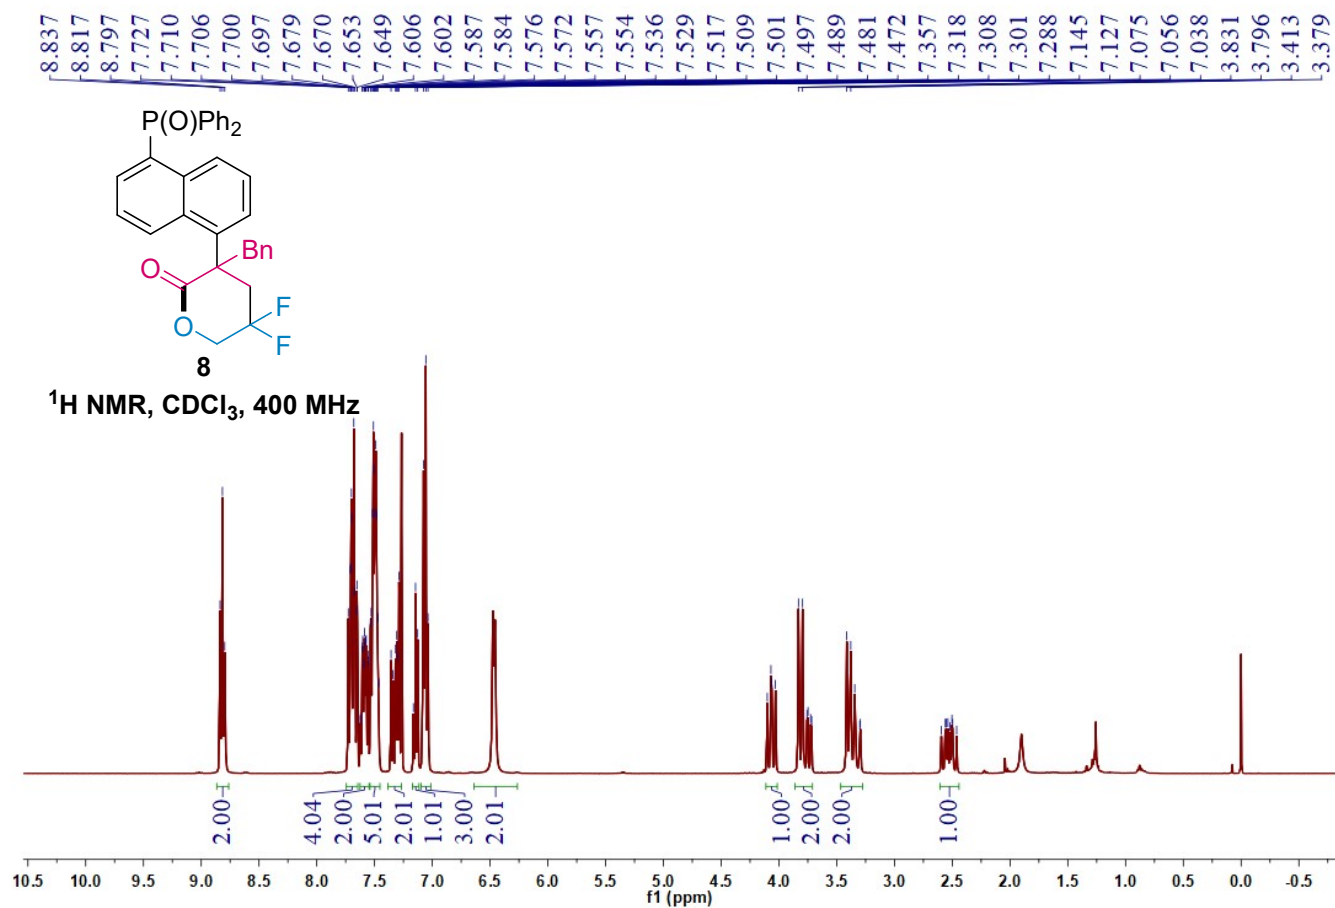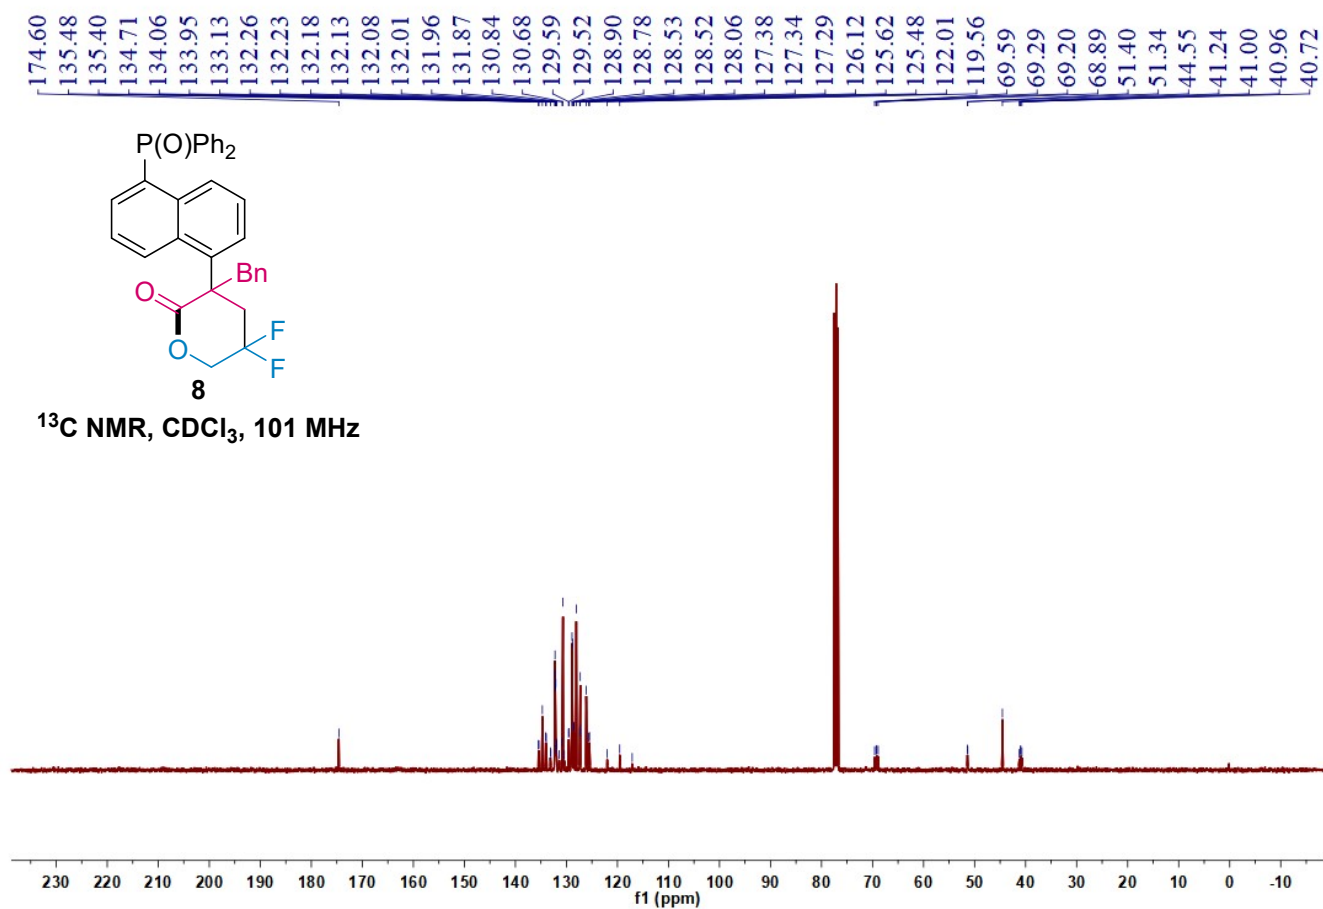

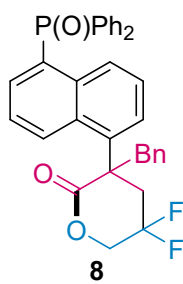

$^{31}\text{P}$  NMR,  $\text{CDCl}_3$ , 162 MHz

-33.34

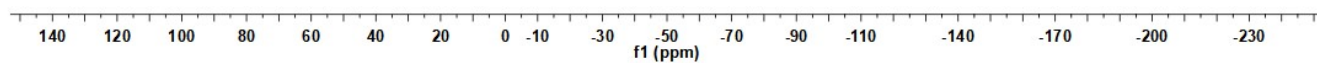

-85.28  
-85.95  
-96.39  
-96.43  
-96.47  
-97.05  
-97.10  
-97.14

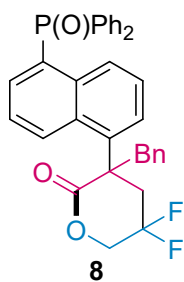

$^{19}\text{F}$  NMR,  $\text{CDCl}_3$ , 377 MHz

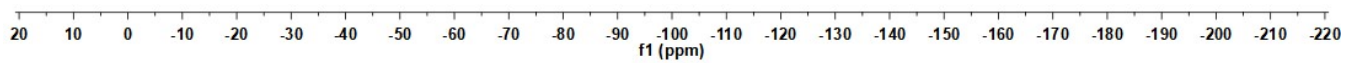

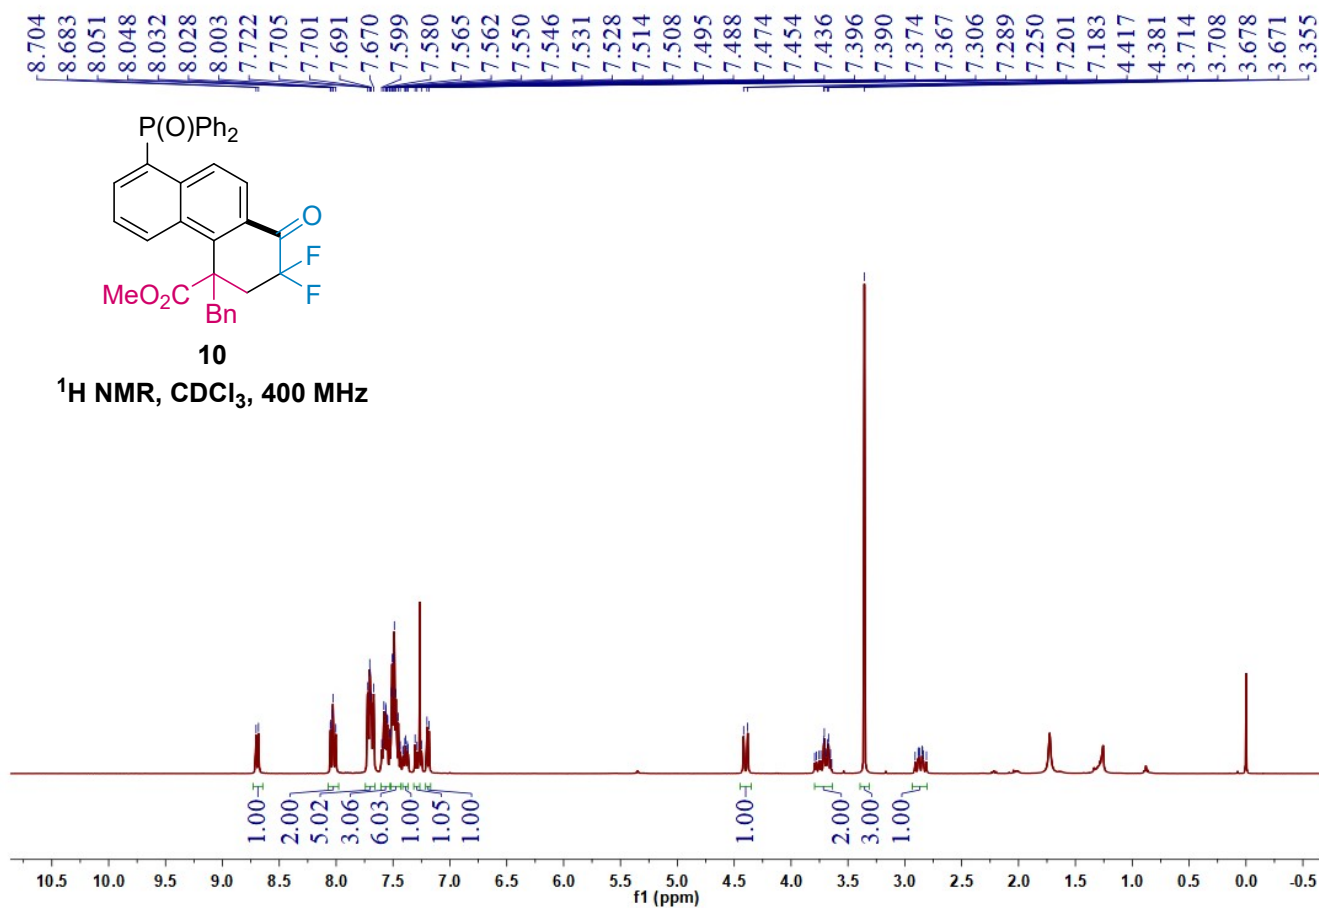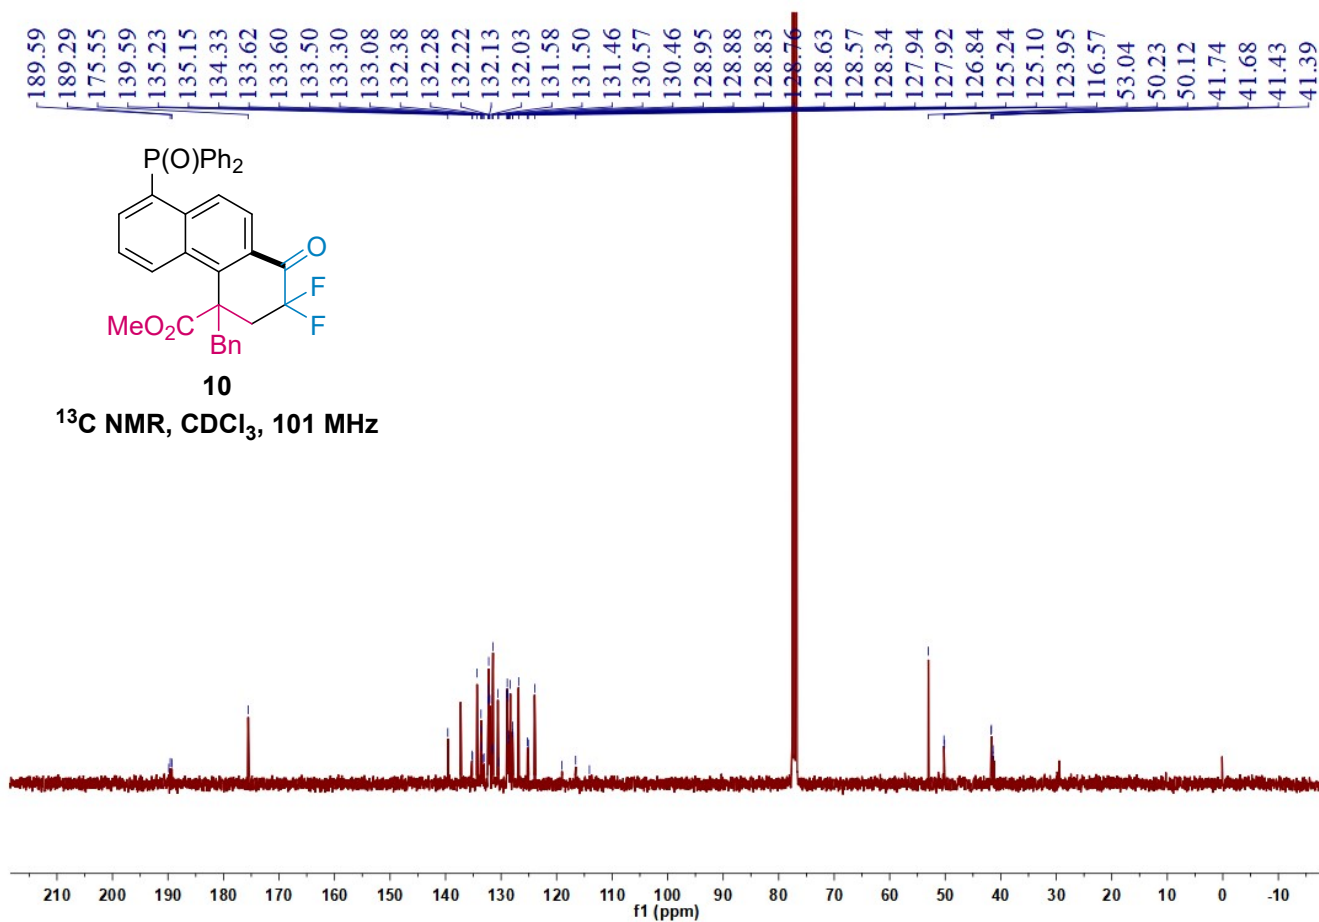

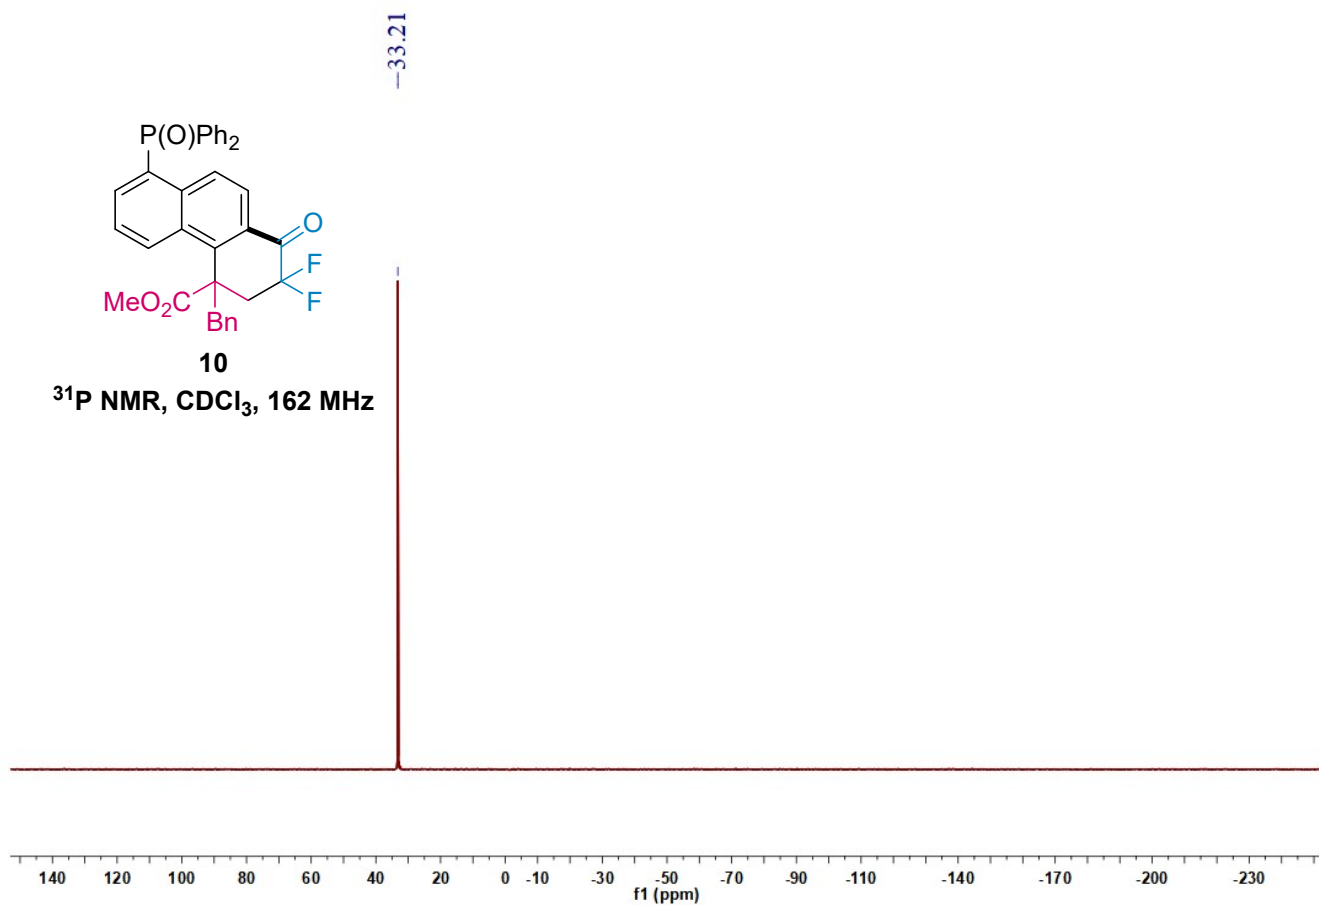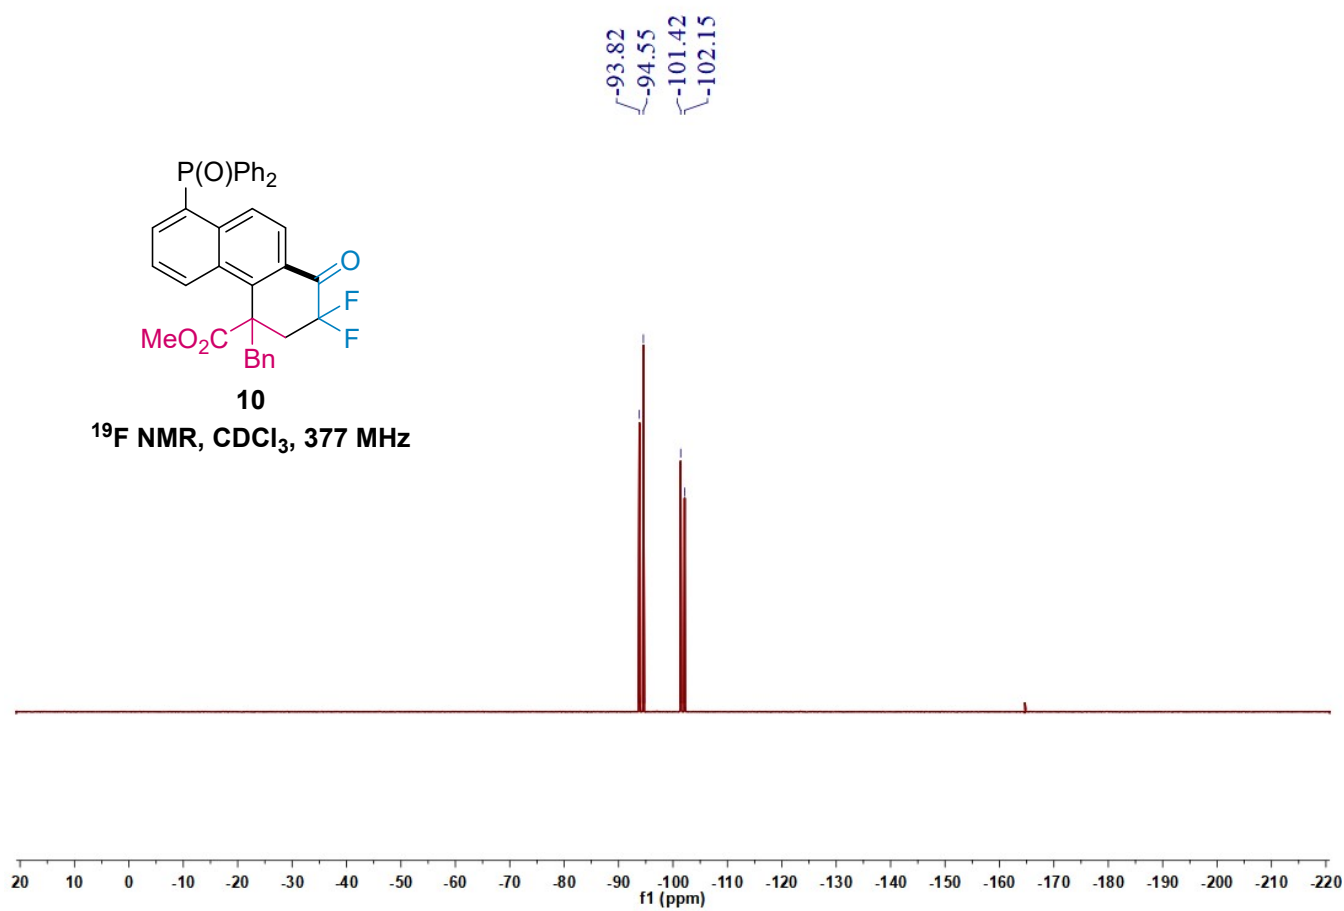

Supplement: d4sc06846g1.pdf [file d4sc06846g1.pdf]
